# Supplementary material for: Automated genome mining predicts structural diversity and taxonomic distribution of peptide metallophores across bacteria
Source: eLife. 2026 Mar 9;14:RP109154. doi: 10.7554/eLife.109154 (PMC12971057; doi:10.7554/eLife.109154)
Supplement: Supplementary file 1. — An Excel (xlsx) file containing four sheets: (a) Reference BGCs used in this work. Numbering matches Figure 3. BGCs marked with an asterisk are non-metallophore BGCs that emerged as false positives during rule development. (b) Data for the rule validation. The sheet contains BGC metadata, notes used for manual classification, and individual results from detection rule strategies, as well as summary confusion matrices and performance metrics. (c) Results for applying detection rules to BGCs from NCBI RefSeq representative bacterial genomes, including bitscore values for significant matches to profile HMMs. (d) Selected MS/MS fragment ions observed for ornicorrugatin produced by Pseudomonas brassicacearum DSM 13227. All given fragment ions agree with previously reported masses for ornicorrugatin (Matthijs et al., 2008). [file elife-109154-supp1.xlsx]

## Sheet: 1a - BGCs
BGC #	Siderophore	MIBIG v2	MIBIG v3	Organism	File name in supplementary data
1	anachelin		BGC0002532	Anabaena cylindrica PCC 7122	ref_Anachelin_NZ_AP018166.1_NZ_AP018166.1.region001.gbk	BGC0002532
2	ulbactin		BGC0002472	Brevibacillus brevis	ref_ulbactin_NZ_BDFB01000007_NZ_BDFB01000007.region001.gbk	BGC0002472
3	amychelin	BGC0000300		Streptomyces sp. AA4	ref_BGC0000300_BGC0000300.1.region001.gbk	BGC0000300
4	frankobactin (locus 1)		BGC0002410	Frankia sp. CH37	ref_frankobactin_JADBID010000001.1_JADBID010000001.region001.gbk	BGC0002410
5	gobichelin	BGC0000366		Streptomyces sp. NRRL F-4415	ref_BGC0000366_BGC0000366.1.region001.gbk	BGC0000366
6	qinichelin	BGC0001752		Streptomyces sp. MBT76	ref_BGC0001752_BGC0001752.1.region001.gbk	BGC0001752
7	himastatin*	BGC0001117		Streptomyces himastatinicus ATCC 53653	ref_BGC0001117_BGC0001117.1.region001.gbk	BGC0001117
8	yersiniabactin	BGC0001055		Escherichia coli	ref_BGC0001055_BGC0001055.1.region001.gbk	BGC0001055
9	yersiniabactin		BGC0002570	Pseudomonas syringae pv. tomato str. DC3000	ref_yersiniabactin_NC_004578.1_NC_004578.1.region001.gbk	BGC0002570
10	enantio-pyochelin		BGC0002475	Pseudomonas protegens	ref_enantio-pyochelin_EU088199.1_EU088199.1.region001.gbk	BGC0002475
11	piscibactin		BGC0002533	Photobacterium damselae subsp. piscicida DI21	ref_piscibactin_NZ_KP100338.1_NZ_KP100338.1.region001.gbk	BGC0002533
12	piscibactin		BGC0002613	Vibrio neptunius	ref_piscibactin_JAFHLB010000021.1_JAFHLB010000021.region001.gbk	BGC0002613
13	thiazostatin	BGC0001801		Streptomyces venezuelae ATCC 10712	ref_BGC0001801_BGC0001801.1.region001.gbk	BGC0001801
14	pseudomonine	BGC0000410		Pseudomonas fluorescens	ref_BGC0000410_BGC0000410.1.region001.gbk	BGC0000410
15	acinetobactin	BGC0000294		Acinetobacter baumannii	ref_BGC0000294_BGC0000294.1.region001.gbk	BGC0000294
16	anguibactin		BGC0002468	Vibrio anguillarum 775	ref_anguibactin_AY312585.1_AY312585.1.region001.gbk	BGC0002468
17	amphi-enterobactin	BGC0001890		Vibrio campbellii ATCC BAA-1116	ref_BGC0001890_BGC0001890.1.region001.gbk	BGC0001890
18	vulnibactin	BGC0000460		Vibrio vulnificus CMCP6	ref_BGC0000460_BGC0000460.1.region001.gbk	BGC0000460
19	myxochelin		BGC0002492	Myxococcus xanthus DK 1622	ref_myxochelin_NC_008095_NC_008095.1.region001.gbk	BGC0002492
20	myxochelin	BGC0001345		Stigmatella aurantiaca Sg a15	ref_BGC0001345_BGC0001345.1.region001.gbk	BGC0001345
21	coelibactin	BGC0000324		Streptomyces coelicolor A3(2)	ref_BGC0000324_BGC0000324.1.region001.gbk	BGC0000324
22	mycobactin	BGC0001021		Mycobacterium tuberculosis H37Rv	ref_BGC0001021_BGC0001021.1.region001.gbk	BGC0001021
23	nocobactin	BGC0001027		Nocardia farcinica IFM 10152	ref_BGC0001027_BGC0001027.1.region001.gbk	BGC0001027
24	amphibactin		BGC0002465	Alcanivorax borkumensis SK2	ref_Amphibactin_NC_008260.1_NC_008260.1.region001.gbk	BGC0002465
25	vicibactin	BGC0000457		Rhizobium etli CFN 42	ref_BGC0000457_BGC0000457.1.region001.gbk	BGC0000457
26	erythrochelin	BGC0000349		Saccharopolyspora erythraea NRRL 2338	ref_BGC0000349_BGC0000349.1.region001.gbk	BGC0000349
27	peucechelin		BGC0002466	Streptomyces peucetius subsp. caesius ATCC 27952	ref_peucechelin_NZ_CP022438.1_NZ_CP022438.1.region001.gbk	BGC0002466
28	salinichelin	BGC0001767		Salinispora pacifica CNY331	ref_BGC0001767_BGC0001767.1.region001.gbk	BGC0001767
29	albachelin	BGC0001211		Amycolatopsis alba DSM 44262	ref_BGC0001211_BGC0001211.1.region001.gbk	BGC0001211
30	thermochelin		BGC0002467	Thermocrispum agreste DSM 44070	ref_Thermochelin_NZ_KE386603_NZ_KE386603.1.region001.gbk	BGC0002467
31	scabichelin	BGC0000423		Streptomyces scabiei 87.22	ref_BGC0000423_BGC0000423.1.region001.gbk	BGC0000423
32	mirubactin	BGC0000392		Actinosynnema mirum DSM 43827	ref_BGC0000392_BGC0000392.1.region001.gbk	BGC0000392
33	parabactin		BGC0002493	Paracoccus denitrificans PD1222	ref_parabactin_NC_008686_NC_008686.1.region001.gbk	BGC0002493
34	propanochelin		BGC0002473	Acinetobacter bouvetii DSM 14964 = CIP 107468	ref_propanochelin_NZ_KB892261.1_NZ_KB892261.1.region001.gbk	BGC0002473
35	cyclic trichrysobactin		BGC0002414	Dickeya chrysanthemi	ref_cyclic_NZ_JAFCAF010000006.1_c00001_NZ_JAFC...region001.gbk	BGC0002414
36	trivanchrobactin		BGC0002415	Vibrio campbellii	ref_trivanchrobactin_NZ_CP030789.1_NZ_CP030789.1.region001.gbk	BGC0002415
37	frederiksenibactin		BGC0002413	Yersinia frederiksenii ATCC 33641	ref_frederiksenibactin_NZ_KN150731.1_NZ_KN150731.1.region001.gbk	BGC0002413
38	vanchrobactin	BGC0000454		Vibrio anguillarum RV22	ref_BGC0000454_BGC0000454.1.region001.gbk	BGC0000454
39	coelichelin	BGC0000325		Streptomyces coelicolor A3(2)	ref_BGC0000325_BGC0000325.1.region001.gbk	BGC0000325
40	streptobactin	BGC0000368		Streptomyces sp. ATCC 700974	ref_BGC0000368_BGC0000368.1.region001.gbk	BGC0000368
41	fuscachelin	BGC0000359		Thermobifida fusca YX	ref_BGC0000359_BGC0000359.1.region001.gbk	BGC0000359
42	histicorrugatin		BGC0002422	Pseudomonas thivervalensis	ref_histicorrugatin_NZ_LT629691_NZ_LT629691.1.region001.gbk	BGC0002422
43	azotobactin		BGC0002433	Azotobacter vinelandii DJ	ref_Azotobactin_NC_012560_NC_012560.1.region001.gbk	BGC0002433
44	pyoverdine PAO1	BGC0000413		Pseudomonas protegens Pf-5	ref_BGC0000413_BGC0000413.1.region001.gbk	BGC0000413
45	pyoverdine DC3000		BGC0002571	Pseudomonas syringae pv. tomato str. DC3000	ref_pyoverdine2_CP000076.1_CP000076.1.region001.gbk	BGC0002571
46	bacillibactin	BGC0001185		Bacillus velezensis FZB42	ref_BGC0001185_BGC0001185.1.region001.gbk	BGC0001185
47	bacillibactin	BGC0000309		Bacillus subtilis subsp. subtilis str. 168	ref_BGC0000309_BGC0000309.1.region001.gbk	BGC0000309
48	paenibactin	BGC0000401		Paenibacillus elgii B69	ref_BGC0000401_BGC0000401.1.region001.gbk	BGC0000401
49	alterobactin		*	Pseudoalteromonas luteoviolacea DSM 6061	ref_alterobactin_AQHB01000035.1.region001.gbk	*
50	pseudochelin		BGC0002491	Pseudoalteromonas piscicida	ref_pseudochelin_NZ_JXXW01000072.1_NZ_JXXW01000072.region001.gbk	BGC0002491
51	amonabactin	BGC0001502		Aeromonas hydrophila subsp. hydrophila ATCC 7966	ref_BGC0001502_BGC0001502.1.region001.gbk	BGC0001502
52	aminochelin		BGC0002528	Azotobacter vinelandii CA	ref_aminochelin_CP005094.1_CP005094.1.region001.gbk	BGC0002528
53	fimsbactin	BGC0000352		Acinetobacter sp. ADP1	ref_BGC0000352_BGC0000352.1.region001.gbk	BGC0000352
54	vibriobactin		BGC0002494	Vibrio cholerae	ref_vibriobactin_U52150.2_U52150.2.region001.gbk	BGC0002494
55	photobactin		BGC0002495	Photorhabdus luminescens	ref_photobactin_AY042783_AY042783.1.region001.gbk	BGC0002495
56	heterobactin	BGC0000371		Rhodococcus erythropolis PR4	ref_BGC0000371_BGC0000371.1.region001.gbk	BGC0000371
57	ornibactin	BGC0001721		Burkholderia cepacia	ref_BGC0001721_BGC0001721.1.region001.gbk	BGC0001721
58	malleobactin X		BGC0002408	Collimonas pratensis	ref_malleobactin_WXXL01000019.1_WXXL01000019.1.region001.gbk	BGC0002408
59	malleobactin LB400		BGC0002421	Paraburkholderia xenovorans LB400	ref_malleobactin_NC_007952_NC_007952.1.region001.gbk	BGC0002421
60	delftibactin	BGC0000984		Delftia acidovorans SPH-1	ref_BGC0000984_BGC0000984.1.region001.gbk	BGC0000984
61	cupriachelin	BGC0000330		Cupriavidus necator H16	ref_BGC0000330_BGC0000330.1.region001.gbk	BGC0000330
62	pacifibactin		BGC0002418	Alcanivorax pacificus W11-5	ref_pacifibactin_NZ_CP004387.1_NZ_CP004387.1.region001.gbk	BGC0002418
63	taiwachelin	BGC0001189		Cupriavidus taiwanensis LMG 19424	ref_BGC0001189_BGC0001189.1.region001.gbk	BGC0001189
64	serobactin	BGC0000424		Herbaspirillum seropedicae SmR1	ref_BGC0000424_BGC0000424.1.region001.gbk	BGC0000424
65	acidobactin		BGC0002419	Acidovorax citrulli AAC00-1	ref_acidobactin_CP000512.1_CP000512.1.region001.gbk	BGC0002419
66	variobactin		BGC0002416	Variovorax paradoxus	ref_variobactin_KT362218.1_KT362218.1.region001.gbk	BGC0002416
67	vacidobactin		BGC0002420	Variovorax paradoxus S110	ref_vacidobactin_NC_012791.1_NC_012791.1.region001.gbk	BGC0002420
68	variochelin		BGC0002417	Variovorax paradoxus B4	ref_variochelin_NC_022247.1_NC_022247.1.region001.gbk	BGC0002417
69	crochelin	BGC0002001		Azotobacter chroococcum NCIMB 8003	ref_BGC0002001_BGC0002001.1.region001.gbk	BGC0002001
70	plantaribactin		BGC0002565	Burkholderia plantarii	ref_plantaribactin_NZ_CP002581.1_NZ_CP002581.1.region001.gbk	BGC0002565
71	gramibactin	BGC0001999		Paraburkholderia graminis C4D1M	ref_BGC0001999_BGC0001999.1.region001.gbk	BGC0001999
72	gramibactin B		BGC0002563	Paraburkholderia caledonica	ref_gramibactin_NZ_CP024905.1_NZ_CP024905.1.region001.gbk	BGC0002563
73	megapolibactin		BGC0002564	Paraburkholderia megapolitana	ref_megapolibactin_NZ_CP041745.1_NZ_CP041745.1.region001.gbk	BGC0002564
Not clustered in BiG-SCAPE:
	kutzneride*	BGC0000378		Kutzneria sp. 744	ref_BGC0000378_BGC0000378.1.region001.gbk	BGC0000378
	viscosin*	BGC0001312		Pseudomonas fluorescens SBW25	ref_BGC0001312_BGC0001312.1.region001.gbk	BGC0001312
	frankobactin (locus 2)		BGC0002409	Frankia sp. CH37	ref_frankobactin2_JADBID010000001.1_JADBID010000001.region001.gbk	BGC0002409
	cyanochelin		BGC0002411	Rivularia sp. PCC 7116	ref_cyanochelin_CP003549_CP003549.1.region001.gbk	BGC0002411
	aminochelin (locus 2)		BGC0002529	Azotobacter vinelandii CA	ref_aminochelin2_CP005094.1_CP005094.1.region001.gbk	BGC0002529

## Sheet: 1b - Manual curation
								MANUAL CURATION					ANTISMASH DETECTION										TRANSPORTER GENES					EITHER/OR COMBINATION				JUST TONB					manual yes:		180	(original 176)			TP	FN					Gram stain from bacdive:
								Predicted Metallophore?	Only if yes: because I saw...				Predicted Metallophore?			What went wrong?		Corrected Manual					Predicted Siderophore?					Predicted Siderophore?									manual no:		578				FP	TN
	Cluster	Accession	Organism	Gram stain (BacDive)	Index				synthesis	transport	Fe utiliz.	comments		match?		category	description			match?				match?		FP only: What went wrong?			match?			TonB	match?
1	GCF_000009365.1_ASM936v1_genomic_NC_008260.1.region002.gbk	GCF_000009365.1	Alcanivorax borkumensis SK2	negative	A	1		FALSE	FALSE	FALSE	FALSE		FALSE	TRUE	TN			FALSE	FALSE	TRUE	TN		FALSE	TRUE	TN			FALSE	TRUE	TN		FALSE	TRUE	TN					AntiSMASH									AntiSMASH, Gram positive
2	GCF_000009365.1_ASM936v1_genomic_NC_008260.1.region003.gbk	GCF_000009365.1	Alcanivorax borkumensis SK2	negative	A	2		TRUE	TRUE	TRUE	TRUE		TRUE	TRUE	TP			TRUE	TRUE	TRUE	TP		FALSE	FALSE	FN			TRUE	TRUE	TP		TRUE	TRUE	TP					yes	no		Accuracy	0.940633					yes	no
3	GCF_000010305.1_ASM1030v1_genomic_NC_012489.1.region003.gbk	GCF_000010305.1	Gemmatimonas aurantiaca T-27	negative	A	3		TRUE	TRUE	TRUE	FALSE		TRUE	TRUE	TP			TRUE	TRUE	TRUE	TP		TRUE	TRUE	TP			TRUE	TRUE	TP		FALSE	FALSE	FN			manual	yes	140	40		Precision	0.965517			manual	yes	40	12
4	GCF_000010525.1_ASM1052v1_genomic_NC_009937.1.region005.gbk	GCF_000010525.1	Azorhizobium caulinodans ORS 571	negative	A	4		TRUE	TRUE	TRUE	FALSE		TRUE	TRUE	TP			TRUE	TRUE	TRUE	TP		TRUE	TRUE	TP			TRUE	TRUE	TP		TRUE	TRUE	TP				no	5	573		Recall	0.777778				no	2	167
5	GCF_000011245.1_ASM1124v1_genomic_NC_004193.1.region003.gbk	GCF_000011245.1	Oceanobacillus iheyensis HTE831	positive	A	5		TRUE	TRUE	FALSE	FALSE		TRUE	TRUE	TP			TRUE	TRUE	TRUE	TP		FALSE	FALSE	FN			TRUE	TRUE	TP		FALSE	FALSE	FN					145	613		F1	0.861538					42	179
6	GCF_000012985.1_ASM1298v1_genomic_NC_007645.1.region005.gbk	GCF_000012985.1	Hahella chejuensis KCTC 2396	negative	A	6		FALSE	FALSE	FALSE	FALSE		FALSE	TRUE	TN			FALSE	FALSE	TRUE	TN		FALSE	TRUE	TN			FALSE	TRUE	TN		FALSE	TRUE	TN
7	GCF_000012985.1_ASM1298v1_genomic_NC_007645.1.region006.gbk	GCF_000012985.1	Hahella chejuensis KCTC 2396	negative	A	7		FALSE	FALSE	FALSE	FALSE		FALSE	TRUE	TN			FALSE	FALSE	TRUE	TN		FALSE	TRUE	TN			FALSE	TRUE	TN		FALSE	TRUE	TN					Transport									Transport, Gram positive
8	GCF_000012985.1_ASM1298v1_genomic_NC_007645.1.region007.gbk	GCF_000012985.1	Hahella chejuensis KCTC 2396	negative	A	8		FALSE	FALSE	FALSE	FALSE	has TauD	FALSE	TRUE	TN			FALSE	FALSE	TRUE	TN		FALSE	TRUE	TN			FALSE	TRUE	TN		FALSE	TRUE	TN					yes	no		Accuracy	0.883905					yes	no
9	GCF_000012985.1_ASM1298v1_genomic_NC_007645.1.region008.gbk	GCF_000012985.1	Hahella chejuensis KCTC 2396	negative	A	9		FALSE	FALSE	TRUE	FALSE	has transport, no synth	FALSE	TRUE	TN			FALSE	FALSE	TRUE	TN		TRUE	FALSE	FP	coincidental transport, based on homologs all lacking it		TRUE	FALSE	FP		TRUE	FALSE	FP			manual	yes	100	80		Precision	0.925926			manual	yes	32	20
10	GCF_000012985.1_ASM1298v1_genomic_NC_007645.1.region009.gbk	GCF_000012985.1	Hahella chejuensis KCTC 2396	negative	A	10		FALSE	FALSE	FALSE	FALSE		FALSE	TRUE	TN			FALSE	FALSE	TRUE	TN		FALSE	TRUE	TN			FALSE	TRUE	TN		FALSE	TRUE	TN				no	8	570		Recall	0.555556				no	3	166
11	GCF_000012985.1_ASM1298v1_genomic_NC_007645.1.region010.gbk	GCF_000012985.1	Hahella chejuensis KCTC 2396	negative	A	11		TRUE	FALSE	TRUE	TRUE		FALSE	FALSE	FN	genes elsewhere	catechol genes elsewhere	TRUE	FALSE	FALSE	FN		FALSE	FALSE	FN			FALSE	FALSE	FN		TRUE	TRUE	TP					108	650		F1	0.694444					35	186
12	GCF_000012985.1_ASM1298v1_genomic_NC_007645.1.region014.gbk	GCF_000012985.1	Hahella chejuensis KCTC 2396	negative	A	12		TRUE	TRUE	TRUE	FALSE		TRUE	TRUE	TP			TRUE	TRUE	TRUE	TP		TRUE	TRUE	TP			TRUE	TRUE	TP		TRUE	TRUE	TP
13	GCF_000013665.1_ASM1366v1_genomic_NC_007912.1.region005.gbk	GCF_000013665.1	Saccharophagus degradans 2-40	negative	A	13		TRUE	TRUE	TRUE	TRUE		TRUE	TRUE	TP			TRUE	TRUE	TRUE	TP		FALSE	FALSE	FN			TRUE	TRUE	TP		TRUE	TRUE	TP					Either/or									Either/or, Gram positive
14	GCF_000013665.1_ASM1366v1_genomic_NC_007912.1.region007.gbk	GCF_000013665.1	Saccharophagus degradans 2-40	negative	A	14		FALSE	FALSE	FALSE	FALSE	has tonb	FALSE	TRUE	TN			FALSE	FALSE	TRUE	TN		FALSE	TRUE	TN			FALSE	TRUE	TN		TRUE	FALSE	FP					yes	no		Accuracy	0.955145					yes	no
15	GCF_000013765.1_ASM1376v1_genomic_NC_007954.1.region002.gbk	GCF_000013765.1	Shewanella denitrificans OS217	negative	A	15		FALSE	FALSE	FALSE	FALSE	has tonb and looks like anthranilate - interesting but not sid	FALSE	TRUE	TN			FALSE	FALSE	TRUE	TN		FALSE	TRUE	TN			FALSE	TRUE	TN		TRUE	FALSE	FP			manual	yes	159	21		Precision	0.924419			manual	yes	46	6
16	GCF_000013765.1_ASM1376v1_genomic_NC_007954.1.region005.gbk	GCF_000013765.1	Shewanella denitrificans OS217	negative	A	16		FALSE	FALSE	FALSE	FALSE		FALSE	TRUE	TN			FALSE	FALSE	TRUE	TN		FALSE	TRUE	TN			FALSE	TRUE	TN		FALSE	TRUE	TN				no	13	565		Recall	0.883333				no	5	164
17	GCF_000013765.1_ASM1376v1_genomic_NC_007954.1.region008.gbk	GCF_000013765.1	Shewanella denitrificans OS217	negative	A	17		FALSE	FALSE	FALSE	FALSE		FALSE	TRUE	TN			FALSE	FALSE	TRUE	TN		FALSE	TRUE	TN			FALSE	TRUE	TN		FALSE	TRUE	TN					172	586		F1	0.903409					51	170
18	GCF_000013765.1_ASM1376v1_genomic_NC_007954.1.region009.gbk	GCF_000013765.1	Shewanella denitrificans OS217	negative	A	18		FALSE	FALSE	FALSE	FALSE		FALSE	TRUE	TN			FALSE	FALSE	TRUE	TN		FALSE	TRUE	TN			FALSE	TRUE	TN		FALSE	TRUE	TN
19	GCF_000014725.1_ASM1472v1_genomic_NC_008346.1.region001.gbk	GCF_000014725.1	Syntrophomonas wolfei subsp. wolfei str. Goettingen G311	negative	A	19		FALSE	FALSE	FALSE	FALSE		FALSE	TRUE	TN			FALSE	FALSE	TRUE	TN		FALSE	TRUE	TN			FALSE	TRUE	TN		FALSE	TRUE	TN
20	GCF_000015125.1_ASM1512v1_genomic_NC_008639.1.region002.gbk	GCF_000015125.1	Chlorobium phaeobacteroides DSM 266	negative	A	20		FALSE	FALSE	FALSE	FALSE		FALSE	TRUE	TN			FALSE	FALSE	TRUE	TN		FALSE	TRUE	TN			FALSE	TRUE	TN		FALSE	TRUE	TN					Just TonB									Just TonB, Gram positive
21	GCF_000017845.1_ASM1784v1_genomic_NC_010546.1.region003.gbk	GCF_000017845.1	Crocosphaera subtropica ATCC 51142	#N/A	A	21		FALSE	FALSE	FALSE	FALSE	large cluster, has tonB but no clear synth	TRUE	FALSE	FP	TRUE POSITIVE	I missed FbnLM	TRUE	TRUE	TRUE	TP		FALSE	FALSE	FN			TRUE	TRUE	TP		TRUE	TRUE	TP					yes	no		Accuracy	0.833773					yes	no
22	GCF_000018105.1_ASM1810v1_genomic_NC_009926.1.region001.gbk	GCF_000018105.1	Acaryochloris marina MBIC11017	#N/A	A	22		FALSE	FALSE	FALSE	FALSE	neat	TRUE	FALSE	FP	TRUE POSITIVE	I missed FbnLM	TRUE	TRUE	TRUE	TP		FALSE	FALSE	FN			TRUE	TRUE	TP		FALSE	FALSE	FN			manual	yes	107	73		Precision	0.66875			manual	yes	1	51
23	GCF_000018885.1_ASM1888v1_genomic_NC_010168.1.region001.gbk	GCF_000018885.1	Renibacterium salmoninarum ATCC 33209	negative	A	23		FALSE	FALSE	FALSE	FALSE		FALSE	TRUE	TN			FALSE	FALSE	TRUE	TN		FALSE	TRUE	TN			FALSE	TRUE	TN		FALSE	TRUE	TN				no	53	525		Recall	0.594444				no	0	169
24	GCF_000019845.1_ASM1984v1_genomic_NC_010581.1.region001.gbk	GCF_000019845.1	Beijerinckia indica subsp. indica ATCC 9039	negative	A	24		FALSE	FALSE	FALSE	FALSE		FALSE	TRUE	TN			FALSE	FALSE	TRUE	TN		FALSE	TRUE	TN			FALSE	TRUE	TN		FALSE	TRUE	TN					160	598		F1	0.629412					1	220
25	GCF_000019965.1_ASM1996v1_genomic_NC_010571.1.region002.gbk	GCF_000019965.1	Opitutus terrae PB90-1	negative	A	25		FALSE	FALSE	FALSE	FALSE		FALSE	TRUE	TN			FALSE	FALSE	TRUE	TN		FALSE	TRUE	TN			FALSE	TRUE	TN		FALSE	TRUE	TN
26	GCF_000020025.1_ASM2002v1_genomic_NC_010628.1.region004.gbk	GCF_000020025.1	Nostoc punctiforme PCC 73102	#N/A	A	26		FALSE	FALSE	FALSE	FALSE		FALSE	TRUE	TN			FALSE	FALSE	TRUE	TN		FALSE	TRUE	TN			FALSE	TRUE	TN		FALSE	TRUE	TN
27	GCF_000020025.1_ASM2002v1_genomic_NC_010628.1.region005.gbk	GCF_000020025.1	Nostoc punctiforme PCC 73102	#N/A	A	27		FALSE	FALSE	FALSE	FALSE		FALSE	TRUE	TN			FALSE	FALSE	TRUE	TN		FALSE	TRUE	TN			FALSE	TRUE	TN		FALSE	TRUE	TN
28	GCF_000020025.1_ASM2002v1_genomic_NC_010628.1.region010.gbk	GCF_000020025.1	Nostoc punctiforme PCC 73102	#N/A	A	28		FALSE	FALSE	FALSE	FALSE		FALSE	TRUE	TN			FALSE	FALSE	TRUE	TN		FALSE	TRUE	TN			FALSE	TRUE	TN		FALSE	TRUE	TN
29	GCF_000020025.1_ASM2002v1_genomic_NC_010628.1.region011.gbk	GCF_000020025.1	Nostoc punctiforme PCC 73102	#N/A	A	29		FALSE	FALSE	FALSE	FALSE		FALSE	TRUE	TN			FALSE	FALSE	TRUE	TN		FALSE	TRUE	TN			FALSE	TRUE	TN		FALSE	TRUE	TN
30	GCF_000020025.1_ASM2002v1_genomic_NC_010628.1.region014.gbk	GCF_000020025.1	Nostoc punctiforme PCC 73102	#N/A	A	30		TRUE	TRUE	TRUE	FALSE	NOVEL? has tonB and many AA hydroxylases including Asn, very weird	TRUE	TRUE	TP			TRUE	TRUE	TRUE	TP		FALSE	FALSE	FN			TRUE	TRUE	TP		TRUE	TRUE	TP
31	GCF_000020025.1_ASM2002v1_genomic_NC_010628.1.region020.gbk	GCF_000020025.1	Nostoc punctiforme PCC 73102	#N/A	A	31		FALSE	FALSE	FALSE	FALSE		FALSE	TRUE	TN			FALSE	FALSE	TRUE	TN		FALSE	TRUE	TN			FALSE	TRUE	TN		FALSE	TRUE	TN
32	GCF_000020025.1_ASM2002v1_genomic_NC_010630.1.region001.gbk	GCF_000020025.1	Nostoc punctiforme PCC 73102	#N/A	A	32		FALSE	FALSE	FALSE	FALSE		FALSE	TRUE	TN			FALSE	FALSE	TRUE	TN		FALSE	TRUE	TN			FALSE	TRUE	TN		FALSE	TRUE	TN
33	GCF_000020145.1_ASM2014v1_genomic_NC_010644.1.region003.gbk	GCF_000020145.1	Elusimicrobium minutum Pei191	#N/A	A	33		FALSE	FALSE	FALSE	FALSE		FALSE	TRUE	TN			FALSE	FALSE	TRUE	TN		FALSE	TRUE	TN			FALSE	TRUE	TN		FALSE	TRUE	TN
34	GCF_000021745.1_ASM2174v1_genomic_NC_011666.1.region003.gbk	GCF_000021745.1	Methylocella silvestris BL2	negative	A	34		FALSE	FALSE	FALSE	FALSE		FALSE	TRUE	TN			FALSE	FALSE	TRUE	TN		FALSE	TRUE	TN			FALSE	TRUE	TN		FALSE	TRUE	TN
35	GCF_000021745.1_ASM2174v1_genomic_NC_011666.1.region006.gbk	GCF_000021745.1	Methylocella silvestris BL2	negative	A	35		FALSE	FALSE	FALSE	FALSE		FALSE	TRUE	TN			FALSE	FALSE	TRUE	TN		FALSE	TRUE	TN			FALSE	TRUE	TN		FALSE	TRUE	TN
36	GCF_000021745.1_ASM2174v1_genomic_NC_011666.1.region011.gbk	GCF_000021745.1	Methylocella silvestris BL2	negative	A	36		TRUE	TRUE	TRUE	FALSE		TRUE	TRUE	TP			TRUE	TRUE	TRUE	TP		FALSE	FALSE	FN			TRUE	TRUE	TP		TRUE	TRUE	TP
37	GCF_000021805.1_ASM2180v1_genomic_NC_011726.1.region003.gbk	GCF_000021805.1	Rippkaea orientalis PCC 8801	#N/A	A	37		FALSE	FALSE	FALSE	FALSE		FALSE	TRUE	TN			FALSE	FALSE	TRUE	TN		FALSE	TRUE	TN			FALSE	TRUE	TN		FALSE	TRUE	TN
38	GCF_000021805.1_ASM2180v1_genomic_NC_011726.1.region007.gbk	GCF_000021805.1	Rippkaea orientalis PCC 8801	#N/A	A	38		TRUE	TRUE	TRUE	FALSE		TRUE	TRUE	TP			TRUE	TRUE	TRUE	TP		TRUE	TRUE	TP			TRUE	TRUE	TP		TRUE	TRUE	TP
39	GCF_000021805.1_ASM2180v1_genomic_NC_011726.1.region008.gbk	GCF_000021805.1	Rippkaea orientalis PCC 8801	#N/A	A	39		FALSE	FALSE	FALSE	FALSE		FALSE	TRUE	TN			FALSE	FALSE	TRUE	TN		FALSE	TRUE	TN			FALSE	TRUE	TN		FALSE	TRUE	TN
40	GCF_000021925.1_ASM2192v1_genomic_NC_011830.1.region003.gbk	GCF_000021925.1	Desulfitobacterium hafniense DCB-2	negative	A	40		TRUE	TRUE	TRUE	FALSE		TRUE	TRUE	TP			TRUE	TRUE	TRUE	TP		FALSE	FALSE	FN			TRUE	TRUE	TP		FALSE	FALSE	FN
41	GCF_000022025.1_ASM2202v1_genomic_NC_011886.1.region004.gbk	GCF_000022025.1	Pseudarthrobacter chlorophenolicus A6	positive	A	41		FALSE	FALSE	FALSE	FALSE		FALSE	TRUE	TN			FALSE	FALSE	TRUE	TN		FALSE	TRUE	TN			FALSE	TRUE	TN		FALSE	TRUE	TN
42	GCF_000022065.1_ASM2206v1_genomic_NC_011898.1.region003.gbk	GCF_000022065.1	Ruminiclostridium cellulolyticum H10	variable	A	42		FALSE	FALSE	FALSE	FALSE		FALSE	TRUE	TN			FALSE	FALSE	TRUE	TN		FALSE	TRUE	TN			FALSE	TRUE	TN		FALSE	TRUE	TN
43	GCF_000022065.1_ASM2206v1_genomic_NC_011898.1.region004.gbk	GCF_000022065.1	Ruminiclostridium cellulolyticum H10	variable	A	43		FALSE	FALSE	FALSE	FALSE		FALSE	TRUE	TN			FALSE	FALSE	TRUE	TN		FALSE	TRUE	TN			FALSE	TRUE	TN		FALSE	TRUE	TN
44	GCF_000022065.1_ASM2206v1_genomic_NC_011898.1.region008.gbk	GCF_000022065.1	Ruminiclostridium cellulolyticum H10	variable	A	44		FALSE	FALSE	FALSE	FALSE		FALSE	TRUE	TN			FALSE	FALSE	TRUE	TN		FALSE	TRUE	TN			FALSE	TRUE	TN		FALSE	TRUE	TN
45	GCF_000022065.1_ASM2206v1_genomic_NC_011898.1.region009.gbk	GCF_000022065.1	Ruminiclostridium cellulolyticum H10	variable	A	45		FALSE	FALSE	FALSE	FALSE		FALSE	TRUE	TN			FALSE	FALSE	TRUE	TN		FALSE	TRUE	TN			FALSE	TRUE	TN		FALSE	TRUE	TN
46	GCF_000022565.1_ASM2256v1_genomic_NC_012483.1.region002.gbk	GCF_000022565.1	Acidobacterium capsulatum ATCC 51196	negative	A	46		FALSE	FALSE	FALSE	FALSE		FALSE	TRUE	TN			FALSE	FALSE	TRUE	TN		FALSE	TRUE	TN			FALSE	TRUE	TN		FALSE	TRUE	TN
47	GCF_000023865.1_ASM2386v1_genomic_NC_013159.1.region001.gbk	GCF_000023865.1	Saccharomonospora viridis DSM 43017	positive	A	47		FALSE	FALSE	FALSE	FALSE		FALSE	TRUE	TN			FALSE	FALSE	TRUE	TN		FALSE	TRUE	TN			FALSE	TRUE	TN		FALSE	TRUE	TN
48	GCF_000023865.1_ASM2386v1_genomic_NC_013159.1.region002.gbk	GCF_000023865.1	Saccharomonospora viridis DSM 43017	positive	A	48		TRUE	TRUE	TRUE	TRUE		TRUE	TRUE	TP			TRUE	TRUE	TRUE	TP		TRUE	TRUE	TP			TRUE	TRUE	TP		FALSE	FALSE	FN
49	GCF_000024025.1_ASM2402v1_genomic_NC_013131.1.region005.gbk	GCF_000024025.1	Catenulispora acidiphila DSM 44928	positive	A	49		FALSE	FALSE	FALSE	FALSE		FALSE	TRUE	TN			FALSE	FALSE	TRUE	TN		FALSE	TRUE	TN			FALSE	TRUE	TN		FALSE	TRUE	TN
50	GCF_000024025.1_ASM2402v1_genomic_NC_013131.1.region007.gbk	GCF_000024025.1	Catenulispora acidiphila DSM 44928	positive	A	50		FALSE	FALSE	FALSE	FALSE		FALSE	TRUE	TN			FALSE	FALSE	TRUE	TN		FALSE	TRUE	TN			FALSE	TRUE	TN		FALSE	TRUE	TN
51	GCF_000024025.1_ASM2402v1_genomic_NC_013131.1.region017.gbk	GCF_000024025.1	Catenulispora acidiphila DSM 44928	positive	A	51		FALSE	FALSE	FALSE	FALSE		FALSE	TRUE	TN			FALSE	FALSE	TRUE	TN		FALSE	TRUE	TN			FALSE	TRUE	TN		FALSE	TRUE	TN
52	GCF_000024025.1_ASM2402v1_genomic_NC_013131.1.region019.gbk	GCF_000024025.1	Catenulispora acidiphila DSM 44928	positive	A	52		FALSE	FALSE	FALSE	FALSE		FALSE	TRUE	TN			FALSE	FALSE	TRUE	TN		FALSE	TRUE	TN			FALSE	TRUE	TN		FALSE	TRUE	TN
53	GCF_000024205.1_ASM2420v1_genomic_NC_013216.1.region008.gbk	GCF_000024205.1	Desulfofarcimen acetoxidans DSM 771	#N/A	A	53		TRUE	TRUE	FALSE	FALSE		TRUE	TRUE	TP			TRUE	TRUE	TRUE	TP		FALSE	FALSE	FN			TRUE	TRUE	TP		FALSE	FALSE	FN
54	GCF_000024345.1_ASM2434v1_genomic_NC_013729.1.region003.gbk	GCF_000024345.1	Kribbella flavida DSM 17836	positive	A	54		FALSE	FALSE	FALSE	FALSE		FALSE	TRUE	TN			FALSE	FALSE	TRUE	TN		FALSE	TRUE	TN			FALSE	TRUE	TN		FALSE	TRUE	TN
55	GCF_000024345.1_ASM2434v1_genomic_NC_013729.1.region006.gbk	GCF_000024345.1	Kribbella flavida DSM 17836	positive	A	55		FALSE	FALSE	FALSE	FALSE		FALSE	TRUE	TN			FALSE	FALSE	TRUE	TN		FALSE	TRUE	TN			FALSE	TRUE	TN		FALSE	TRUE	TN
56	GCF_000024345.1_ASM2434v1_genomic_NC_013729.1.region010.gbk	GCF_000024345.1	Kribbella flavida DSM 17836	positive	A	56		FALSE	FALSE	FALSE	FALSE		FALSE	TRUE	TN			FALSE	FALSE	TRUE	TN		FALSE	TRUE	TN			FALSE	TRUE	TN		FALSE	TRUE	TN
57	GCF_000024365.1_ASM2436v1_genomic_NC_013235.1.region004.gbk	GCF_000024365.1	Nakamurella multipartita DSM 44233	positive	A	57		FALSE	FALSE	FALSE	FALSE		FALSE	TRUE	TN			FALSE	FALSE	TRUE	TN		FALSE	TRUE	TN			FALSE	TRUE	TN		FALSE	TRUE	TN
58	GCF_000024385.1_ASM2438v1_genomic_NC_013510.1.region001.gbk	GCF_000024385.1	Thermomonospora curvata DSM 43183	positive	A	58		TRUE	TRUE	TRUE	FALSE	"L-2-amino-thiazoline-4-carboxylic acid hydrolase" sounds interesting	TRUE	TRUE	TP			TRUE	TRUE	TRUE	TP		TRUE	TRUE	TP			TRUE	TRUE	TP		FALSE	FALSE	FN
59	GCF_000024385.1_ASM2438v1_genomic_NC_013510.1.region004.gbk	GCF_000024385.1	Thermomonospora curvata DSM 43183	positive	A	59		FALSE	FALSE	FALSE	FALSE		FALSE	TRUE	TN			FALSE	FALSE	TRUE	TN		FALSE	TRUE	TN			FALSE	TRUE	TN		FALSE	TRUE	TN
60	GCF_000024545.1_ASM2454v1_genomic_NC_013947.1.region001.gbk	GCF_000024545.1	Stackebrandtia nassauensis DSM 44728	positive	A	60		FALSE	FALSE	FALSE	FALSE		FALSE	TRUE	TN			FALSE	FALSE	TRUE	TN		FALSE	TRUE	TN			FALSE	TRUE	TN		FALSE	TRUE	TN
61	GCF_000024545.1_ASM2454v1_genomic_NC_013947.1.region012.gbk	GCF_000024545.1	Stackebrandtia nassauensis DSM 44728	positive	A	61		FALSE	FALSE	FALSE	FALSE		FALSE	TRUE	TN			FALSE	FALSE	TRUE	TN		FALSE	TRUE	TN			FALSE	TRUE	TN		FALSE	TRUE	TN
62	GCF_000024545.1_ASM2454v1_genomic_NC_013947.1.region015.gbk	GCF_000024545.1	Stackebrandtia nassauensis DSM 44728	positive	A	62		TRUE	TRUE	TRUE	FALSE		TRUE	TRUE	TP			TRUE	TRUE	TRUE	TP		TRUE	TRUE	TP			TRUE	TRUE	TP		FALSE	FALSE	FN
63	GCF_000024805.1_ASM2480v1_genomic_NC_013440.1.region004.gbk	GCF_000024805.1	Haliangium ochraceum DSM 14365	#N/A	A	63		FALSE	FALSE	FALSE	FALSE		FALSE	TRUE	TN			FALSE	FALSE	TRUE	TN		FALSE	TRUE	TN			FALSE	TRUE	TN		FALSE	TRUE	TN
64	GCF_000024805.1_ASM2480v1_genomic_NC_013440.1.region005.gbk	GCF_000024805.1	Haliangium ochraceum DSM 14365	#N/A	A	64		FALSE	FALSE	FALSE	FALSE		FALSE	TRUE	TN			FALSE	FALSE	TRUE	TN		FALSE	TRUE	TN			FALSE	TRUE	TN		FALSE	TRUE	TN
65	GCF_000024805.1_ASM2480v1_genomic_NC_013440.1.region009.gbk	GCF_000024805.1	Haliangium ochraceum DSM 14365	#N/A	A	65		FALSE	FALSE	FALSE	FALSE		FALSE	TRUE	TN			FALSE	FALSE	TRUE	TN		FALSE	TRUE	TN			FALSE	TRUE	TN		FALSE	TRUE	TN
66	GCF_000024805.1_ASM2480v1_genomic_NC_013440.1.region014.gbk	GCF_000024805.1	Haliangium ochraceum DSM 14365	#N/A	A	66		FALSE	FALSE	FALSE	FALSE		FALSE	TRUE	TN			FALSE	FALSE	TRUE	TN		FALSE	TRUE	TN			FALSE	TRUE	TN		FALSE	TRUE	TN
67	GCF_000024805.1_ASM2480v1_genomic_NC_013440.1.region015.gbk	GCF_000024805.1	Haliangium ochraceum DSM 14365	#N/A	A	67		TRUE	TRUE	TRUE	TRUE		TRUE	TRUE	TP			TRUE	TRUE	TRUE	TP		FALSE	FALSE	FN			TRUE	TRUE	TP		TRUE	TRUE	TP
68	GCF_000024805.1_ASM2480v1_genomic_NC_013440.1.region018.gbk	GCF_000024805.1	Haliangium ochraceum DSM 14365	#N/A	A	68		FALSE	FALSE	FALSE	FALSE		FALSE	TRUE	TN			FALSE	FALSE	TRUE	TN		FALSE	TRUE	TN			FALSE	TRUE	TN		FALSE	TRUE	TN
69	GCF_000024865.1_ASM2486v1_genomic_NC_013595.1.region003.gbk	GCF_000024865.1	Streptosporangium roseum DSM 43021	positive	A	69		FALSE	FALSE	FALSE	FALSE		FALSE	TRUE	TN			FALSE	FALSE	TRUE	TN		FALSE	TRUE	TN			FALSE	TRUE	TN		FALSE	TRUE	TN
70	GCF_000024865.1_ASM2486v1_genomic_NC_013595.1.region004.gbk	GCF_000024865.1	Streptosporangium roseum DSM 43021	positive	A	70		FALSE	FALSE	FALSE	FALSE		FALSE	TRUE	TN			FALSE	FALSE	TRUE	TN		FALSE	TRUE	TN			FALSE	TRUE	TN		FALSE	TRUE	TN
71	GCF_000024865.1_ASM2486v1_genomic_NC_013595.1.region007.gbk	GCF_000024865.1	Streptosporangium roseum DSM 43021	positive	A	71		FALSE	FALSE	FALSE	FALSE		FALSE	TRUE	TN			FALSE	FALSE	TRUE	TN		FALSE	TRUE	TN			FALSE	TRUE	TN		FALSE	TRUE	TN
72	GCF_000024865.1_ASM2486v1_genomic_NC_013595.1.region008.gbk	GCF_000024865.1	Streptosporangium roseum DSM 43021	positive	A	72		TRUE	TRUE	TRUE	FALSE		TRUE	TRUE	TP			TRUE	TRUE	TRUE	TP		TRUE	TRUE	TP			TRUE	TRUE	TP		FALSE	FALSE	FN
73	GCF_000024865.1_ASM2486v1_genomic_NC_013595.1.region010.gbk	GCF_000024865.1	Streptosporangium roseum DSM 43021	positive	A	73		TRUE	TRUE	TRUE	FALSE		FALSE	FALSE	FN	genes missing	salicylate missing	TRUE	FALSE	FALSE	FN		FALSE	FALSE	FN			FALSE	FALSE	FN		FALSE	FALSE	FN
74	GCF_000024865.1_ASM2486v1_genomic_NC_013595.1.region012.gbk	GCF_000024865.1	Streptosporangium roseum DSM 43021	positive	A	74		FALSE	FALSE	FALSE	FALSE		FALSE	TRUE	TN			FALSE	FALSE	TRUE	TN		FALSE	TRUE	TN			FALSE	TRUE	TN		FALSE	TRUE	TN
75	GCF_000024865.1_ASM2486v1_genomic_NC_013595.1.region014.gbk	GCF_000024865.1	Streptosporangium roseum DSM 43021	positive	A	75		FALSE	FALSE	FALSE	FALSE	has abc transport, some potential synth like tauD, but otherwise looks wrong. valine?	FALSE	TRUE	TN			FALSE	FALSE	TRUE	TN		FALSE	TRUE	TN			FALSE	TRUE	TN		FALSE	TRUE	TN
76	GCF_000024865.1_ASM2486v1_genomic_NC_013595.1.region019.gbk	GCF_000024865.1	Streptosporangium roseum DSM 43021	positive	A	76		FALSE	FALSE	FALSE	FALSE		FALSE	TRUE	TN			FALSE	FALSE	TRUE	TN		FALSE	TRUE	TN			FALSE	TRUE	TN		FALSE	TRUE	TN
77	GCF_000024865.1_ASM2486v1_genomic_NC_013595.1.region021.gbk	GCF_000024865.1	Streptosporangium roseum DSM 43021	positive	A	77		FALSE	FALSE	FALSE	FALSE		FALSE	TRUE	TN			FALSE	FALSE	TRUE	TN		FALSE	TRUE	TN			FALSE	TRUE	TN		FALSE	TRUE	TN
78	GCF_000024925.1_ASM2492v1_genomic_NC_013521.1.region003.gbk	GCF_000024925.1	Sanguibacter keddieii DSM 10542	positive	A	78		FALSE	FALSE	FALSE	FALSE	has ABC but nothing else - seems coincidental?	FALSE	TRUE	TN			FALSE	FALSE	TRUE	TN		TRUE	FALSE	FP	coincidental transport		TRUE	FALSE	FP		FALSE	TRUE	TN
79	GCF_000025265.1_ASM2526v1_genomic_NC_013739.1.region003.gbk	GCF_000025265.1	Conexibacter woesei DSM 14684	positive	A	79		FALSE	FALSE	FALSE	FALSE		FALSE	TRUE	TN			FALSE	FALSE	TRUE	TN		FALSE	TRUE	TN			FALSE	TRUE	TN		FALSE	TRUE	TN
80	GCF_000025345.1_ASM2534v1_genomic_NC_013757.1.region005.gbk	GCF_000025345.1	Geodermatophilus obscurus DSM 43160	positive	A	80		FALSE	FALSE	FALSE	FALSE	neat cluster - has SbnAB, tauD, weird nrps, probably not sid	FALSE	TRUE	TN			FALSE	FALSE	TRUE	TN		FALSE	TRUE	TN			FALSE	TRUE	TN		FALSE	TRUE	TN
81	GCF_000026185.1_ASM2618v1_genomic_NC_010694.1.region004.gbk	GCF_000026185.1	Erwinia tasmaniensis Et1/99	negative	A	81		FALSE	FALSE	FALSE	FALSE		FALSE	TRUE	TN			FALSE	FALSE	TRUE	TN		FALSE	TRUE	TN			FALSE	TRUE	TN		FALSE	TRUE	TN
82	GCF_000027225.1_ASM2722v1_genomic_NC_013892.1.region001.gbk	GCF_000027225.1	Xenorhabdus bovienii SS-2004	negative	A	82		FALSE	FALSE	FALSE	FALSE		FALSE	TRUE	TN			FALSE	FALSE	TRUE	TN		FALSE	TRUE	TN			FALSE	TRUE	TN		FALSE	TRUE	TN
83	GCF_000027225.1_ASM2722v1_genomic_NC_013892.1.region003.gbk	GCF_000027225.1	Xenorhabdus bovienii SS-2004	negative	A	83		FALSE	FALSE	FALSE	FALSE		FALSE	TRUE	TN			FALSE	FALSE	TRUE	TN		FALSE	TRUE	TN			FALSE	TRUE	TN		FALSE	TRUE	TN
84	GCF_000027225.1_ASM2722v1_genomic_NC_013892.1.region005.gbk	GCF_000027225.1	Xenorhabdus bovienii SS-2004	negative	A	84		FALSE	FALSE	FALSE	FALSE		FALSE	TRUE	TN			FALSE	FALSE	TRUE	TN		FALSE	TRUE	TN			FALSE	TRUE	TN		FALSE	TRUE	TN
85	GCF_000027225.1_ASM2722v1_genomic_NC_013892.1.region006.gbk	GCF_000027225.1	Xenorhabdus bovienii SS-2004	negative	A	85		TRUE	TRUE	TRUE	FALSE		FALSE	FALSE	FN	genes missing	Fragmented enterobactin cluster: EntA and EntE deleted	TRUE	FALSE	FALSE	FN		TRUE	TRUE	TP			TRUE	TRUE	TP		TRUE	TRUE	TP
86	GCF_000027225.1_ASM2722v1_genomic_NC_013892.1.region007.gbk	GCF_000027225.1	Xenorhabdus bovienii SS-2004	negative	A	86		FALSE	FALSE	FALSE	FALSE		FALSE	TRUE	TN			FALSE	FALSE	TRUE	TN		FALSE	TRUE	TN			FALSE	TRUE	TN		FALSE	TRUE	TN
87	GCF_000027225.1_ASM2722v1_genomic_NC_013892.1.region008.gbk	GCF_000027225.1	Xenorhabdus bovienii SS-2004	negative	A	87		FALSE	FALSE	FALSE	FALSE		FALSE	TRUE	TN			FALSE	FALSE	TRUE	TN		FALSE	TRUE	TN			FALSE	TRUE	TN		FALSE	TRUE	TN
88	GCF_000027225.1_ASM2722v1_genomic_NC_013892.1.region009.gbk	GCF_000027225.1	Xenorhabdus bovienii SS-2004	negative	A	88		FALSE	FALSE	FALSE	FALSE		FALSE	TRUE	TN			FALSE	FALSE	TRUE	TN		FALSE	TRUE	TN			FALSE	TRUE	TN		FALSE	TRUE	TN
89	GCF_000027225.1_ASM2722v1_genomic_NC_013892.1.region010.gbk	GCF_000027225.1	Xenorhabdus bovienii SS-2004	negative	A	89		FALSE	FALSE	FALSE	FALSE		FALSE	TRUE	TN			FALSE	FALSE	TRUE	TN		FALSE	TRUE	TN			FALSE	TRUE	TN		FALSE	TRUE	TN
90	GCF_000027225.1_ASM2722v1_genomic_NC_013892.1.region011.gbk	GCF_000027225.1	Xenorhabdus bovienii SS-2004	negative	A	90		FALSE	FALSE	FALSE	FALSE		FALSE	TRUE	TN			FALSE	FALSE	TRUE	TN		FALSE	TRUE	TN			FALSE	TRUE	TN		FALSE	TRUE	TN
91	GCF_000058485.1_ASM5848v1_genomic_NC_008278.1.region010.gbk	GCF_000058485.1	Frankia alni ACN14a	positive	A	91		FALSE	FALSE	FALSE	FALSE		TRUE	FALSE	FP	antismash issue	negative gene too far away	FALSE	TRUE	FALSE	FP		FALSE	TRUE	TN			TRUE	FALSE	FP		FALSE	TRUE	TN
92	GCF_000058485.1_ASM5848v1_genomic_NC_008278.1.region019.gbk	GCF_000058485.1	Frankia alni ACN14a	positive	A	92		TRUE	TRUE	TRUE	FALSE	investigate - sal + tauD	TRUE	TRUE	TP			TRUE	TRUE	TRUE	TP		TRUE	TRUE	TP			TRUE	TRUE	TP		FALSE	FALSE	FN
93	GCF_000062885.1_ASM6288v1_genomic_NC_009142.1.region011.gbk	GCF_000062885.1	Saccharopolyspora erythraea NRRL 2338	positive	A	93		FALSE	FALSE	FALSE	FALSE		FALSE	TRUE	TN			FALSE	FALSE	TRUE	TN		FALSE	TRUE	TN			FALSE	TRUE	TN		FALSE	TRUE	TN
94	GCF_000062885.1_ASM6288v1_genomic_NC_009142.1.region012.gbk	GCF_000062885.1	Saccharopolyspora erythraea NRRL 2338	positive	A	94		TRUE	TRUE	TRUE	FALSE	investigate - sal + tauD	TRUE	TRUE	TP			TRUE	TRUE	TRUE	TP		FALSE	FALSE	FN			TRUE	TRUE	TP		FALSE	FALSE	FN
95	GCF_000062885.1_ASM6288v1_genomic_NC_009142.1.region015.gbk	GCF_000062885.1	Saccharopolyspora erythraea NRRL 2338	positive	A	95		TRUE	TRUE	TRUE	FALSE		TRUE	TRUE	TP			TRUE	TRUE	TRUE	TP		FALSE	FALSE	FN			TRUE	TRUE	TP		FALSE	FALSE	FN
96	GCF_000062885.1_ASM6288v1_genomic_NC_009142.1.region025.gbk	GCF_000062885.1	Saccharopolyspora erythraea NRRL 2338	positive	A	96		FALSE	FALSE	FALSE	FALSE		FALSE	TRUE	TN			FALSE	FALSE	TRUE	TN		FALSE	TRUE	TN			FALSE	TRUE	TN		FALSE	TRUE	TN
97	GCF_000067165.1_ASM6716v1_genomic_NC_010162.1.region003.gbk	GCF_000067165.1	Sorangium cellulosum So ce56	negative	A	97		FALSE	FALSE	FALSE	FALSE		FALSE	TRUE	TN			FALSE	FALSE	TRUE	TN		FALSE	TRUE	TN			FALSE	TRUE	TN		FALSE	TRUE	TN
98	GCF_000067165.1_ASM6716v1_genomic_NC_010162.1.region014.gbk	GCF_000067165.1	Sorangium cellulosum So ce56	negative	A	98		FALSE	FALSE	FALSE	FALSE		FALSE	TRUE	TN			FALSE	FALSE	TRUE	TN		FALSE	TRUE	TN			FALSE	TRUE	TN		FALSE	TRUE	TN
99	GCF_000067165.1_ASM6716v1_genomic_NC_010162.1.region018.gbk	GCF_000067165.1	Sorangium cellulosum So ce56	negative	A	99		TRUE	TRUE	TRUE	TRUE		TRUE	TRUE	TP			TRUE	TRUE	TRUE	TP		FALSE	FALSE	FN			TRUE	TRUE	TP		TRUE	TRUE	TP
100	GCF_000067165.1_ASM6716v1_genomic_NC_010162.1.region019.gbk	GCF_000067165.1	Sorangium cellulosum So ce56	negative	A	100		FALSE	FALSE	FALSE	FALSE		FALSE	TRUE	TN			FALSE	FALSE	TRUE	TN		FALSE	TRUE	TN			FALSE	TRUE	TN		TRUE	FALSE	FP
101	GCF_000067165.1_ASM6716v1_genomic_NC_010162.1.region027.gbk	GCF_000067165.1	Sorangium cellulosum So ce56	negative	B	1		FALSE	FALSE	FALSE	FALSE		FALSE	TRUE	TN			FALSE	FALSE	TRUE	TN		FALSE	TRUE	TN			FALSE	TRUE	TN		FALSE	TRUE	TN
102	GCF_000067165.1_ASM6716v1_genomic_NC_010162.1.region033.gbk	GCF_000067165.1	Sorangium cellulosum So ce56	negative	B	2		TRUE	TRUE	TRUE	FALSE		TRUE	TRUE	TP			TRUE	TRUE	TRUE	TP		FALSE	FALSE	FN			TRUE	TRUE	TP		TRUE	TRUE	TP
103	GCF_000067205.1_ASM6720v1_genomic_NC_010170.1.region005.gbk	GCF_000067205.1	Bordetella petrii	negative	B	3		FALSE	FALSE	FALSE	FALSE	Seems to be a cheater - has transport and fragment of NRPS. clusterblast shows relatives have full nrps	FALSE	TRUE	TN			FALSE	FALSE	TRUE	TN		TRUE	FALSE	FP	cheater with fragment of biosynthesis		TRUE	FALSE	FP		TRUE	FALSE	FP
104	GCF_000092245.1_ASM9224v1_genomic_NC_014166.1.region001.gbk	GCF_000092245.1	Arcobacter nitrofigilis DSM 7299	negative	B	4		FALSE	FALSE	FALSE	FALSE		FALSE	TRUE	TN			FALSE	FALSE	TRUE	TN		FALSE	TRUE	TN			FALSE	TRUE	TN		TRUE	FALSE	FP
105	GCF_000092825.1_ASM9282v1_genomic_NC_014168.1.region004.gbk	GCF_000092825.1	Segniliparus rotundus DSM 44985	positive	B	5		TRUE	FALSE	TRUE	TRUE		TRUE	TRUE	TP			TRUE	TRUE	TRUE	TP		FALSE	FALSE	FN			TRUE	TRUE	TP		FALSE	FALSE	FN
106	GCF_000092825.1_ASM9282v1_genomic_NC_014168.1.region006.gbk	GCF_000092825.1	Segniliparus rotundus DSM 44985	positive	B	6		FALSE	FALSE	FALSE	FALSE		FALSE	TRUE	TN			FALSE	FALSE	TRUE	TN		FALSE	TRUE	TN			FALSE	TRUE	TN		FALSE	TRUE	TN
107	GCF_000092925.1_ASM9292v1_genomic_NC_014217.1.region004.gbk	GCF_000092925.1	Starkeya novella DSM 506	#N/A	B	7		TRUE	TRUE	TRUE	FALSE		TRUE	TRUE	TP			TRUE	TRUE	TRUE	TP		TRUE	TRUE	TP			TRUE	TRUE	TP		FALSE	FALSE	FN
108	GCF_000143145.1_ASM14314v1_genomic_NC_014313.1.region004.gbk	GCF_000143145.1	Hyphomicrobium denitrificans ATCC 51888	negative	B	8		FALSE	FALSE	FALSE	FALSE		FALSE	TRUE	TN			FALSE	FALSE	TRUE	TN		FALSE	TRUE	TN			FALSE	TRUE	TN		TRUE	FALSE	FP
109	GCF_000145035.1_ASM14503v1_genomic_NC_014387.1.region001.gbk	GCF_000145035.1	Butyrivibrio proteoclasticus B316	#N/A	B	9		FALSE	FALSE	FALSE	FALSE		FALSE	TRUE	TN			FALSE	FALSE	TRUE	TN		FALSE	TRUE	TN			FALSE	TRUE	TN		FALSE	TRUE	TN
110	GCF_000145235.1_ASM14523v1_genomic_NC_014391.1.region005.gbk	GCF_000145235.1	Micromonospora aurantiaca ATCC 27029	positive	B	10		FALSE	FALSE	FALSE	FALSE		FALSE	TRUE	TN			FALSE	FALSE	TRUE	TN		FALSE	TRUE	TN			FALSE	TRUE	TN		FALSE	TRUE	TN
111	GCF_000145235.1_ASM14523v1_genomic_NC_014391.1.region008.gbk	GCF_000145235.1	Micromonospora aurantiaca ATCC 27029	positive	B	11		FALSE	FALSE	FALSE	FALSE		FALSE	TRUE	TN			FALSE	FALSE	TRUE	TN		FALSE	TRUE	TN			FALSE	TRUE	TN		FALSE	TRUE	TN
112	GCF_000145235.1_ASM14523v1_genomic_NC_014391.1.region009.gbk	GCF_000145235.1	Micromonospora aurantiaca ATCC 27029	positive	B	12		FALSE	FALSE	FALSE	FALSE		FALSE	TRUE	TN			FALSE	FALSE	TRUE	TN		FALSE	TRUE	TN			FALSE	TRUE	TN		FALSE	TRUE	TN
113	GCF_000145235.1_ASM14523v1_genomic_NC_014391.1.region013.gbk	GCF_000145235.1	Micromonospora aurantiaca ATCC 27029	positive	B	13		FALSE	FALSE	FALSE	FALSE		FALSE	TRUE	TN			FALSE	FALSE	TRUE	TN		FALSE	TRUE	TN			FALSE	TRUE	TN		FALSE	TRUE	TN
114	GCF_000146505.1_ASM14650v1_genomic_NC_017448.1.region003.gbk	GCF_000146505.1	Fibrobacter succinogenes subsp. succinogenes S85	negative	B	14		FALSE	FALSE	FALSE	FALSE		FALSE	TRUE	TN			FALSE	FALSE	TRUE	TN		FALSE	TRUE	TN			FALSE	TRUE	TN		FALSE	TRUE	TN
115	GCF_000147335.1_ASM14733v1_genomic_NC_014533.1.region001.gbk	GCF_000147335.1	Gloeothece verrucosa PCC 7822	#N/A	B	15		FALSE	FALSE	FALSE	FALSE		FALSE	TRUE	TN			FALSE	FALSE	TRUE	TN		FALSE	TRUE	TN			FALSE	TRUE	TN		FALSE	TRUE	TN
116	GCF_000147335.1_ASM14733v1_genomic_NC_014533.1.region002.gbk	GCF_000147335.1	Gloeothece verrucosa PCC 7822	#N/A	B	16		FALSE	FALSE	FALSE	FALSE		FALSE	TRUE	TN			FALSE	FALSE	TRUE	TN		FALSE	TRUE	TN			FALSE	TRUE	TN		FALSE	TRUE	TN
117	GCF_000164695.2_ASM16469v2_genomic_NC_014643.1.region004.gbk	GCF_000164695.2	Rothia dentocariosa ATCC 17931	positive	B	17		TRUE	TRUE	TRUE	TRUE		FALSE	FALSE	FN	genes elsewhere	catechol genes elsewhere	TRUE	FALSE	FALSE	FN		TRUE	TRUE	TP			TRUE	TRUE	TP		FALSE	FALSE	FN
118	GCF_000176855.2_ASM17685v2_genomic_NC_015138.1.region006.gbk	GCF_000176855.2	Acidovorax avenae subsp. avenae ATCC 19860	negative	B	18		TRUE	TRUE	TRUE	TRUE		TRUE	TRUE	TP			TRUE	TRUE	TRUE	TP		FALSE	FALSE	FN			TRUE	TRUE	TP		TRUE	TRUE	TP
119	GCF_000176855.2_ASM17685v2_genomic_NC_015138.1.region009.gbk	GCF_000176855.2	Acidovorax avenae subsp. avenae ATCC 19860	negative	B	19		FALSE	FALSE	FALSE	FALSE		FALSE	TRUE	TN			FALSE	FALSE	TRUE	TN		FALSE	TRUE	TN			FALSE	TRUE	TN		FALSE	TRUE	TN
120	GCF_000178835.2_ASM17883v2_genomic_NC_015275.1.region007.gbk	GCF_000178835.2	Cellulosilyticum lentocellum DSM 5427	negative	B	20		FALSE	FALSE	FALSE	FALSE		FALSE	TRUE	TN			FALSE	FALSE	TRUE	TN		FALSE	TRUE	TN			FALSE	TRUE	TN		FALSE	TRUE	TN
121	GCF_000178955.2_ASM17895v2_genomic_NC_016631.1.region006.gbk	GCF_000178955.2	Granulicella mallensis MP5ACTX8	negative	B	21		FALSE	FALSE	FALSE	FALSE		FALSE	TRUE	TN			FALSE	FALSE	TRUE	TN		FALSE	TRUE	TN			FALSE	TRUE	TN		FALSE	TRUE	TN
122	GCF_000178955.2_ASM17895v2_genomic_NC_016631.1.region009.gbk	GCF_000178955.2	Granulicella mallensis MP5ACTX8	negative	B	22		FALSE	FALSE	FALSE	FALSE		FALSE	TRUE	TN			FALSE	FALSE	TRUE	TN		FALSE	TRUE	TN			FALSE	TRUE	TN		FALSE	TRUE	TN
123	GCF_000178955.2_ASM17895v2_genomic_NC_016631.1.region011.gbk	GCF_000178955.2	Granulicella mallensis MP5ACTX8	negative	B	23		FALSE	FALSE	FALSE	FALSE		FALSE	TRUE	TN			FALSE	FALSE	TRUE	TN		FALSE	TRUE	TN			FALSE	TRUE	TN		FALSE	TRUE	TN
124	GCF_000179635.2_ASM17963v2_genomic_NC_014833.1.region001.gbk	GCF_000179635.2	Ruminococcus albus 7 = DSM 20455	positive	B	24		FALSE	FALSE	FALSE	FALSE		FALSE	TRUE	TN			FALSE	FALSE	TRUE	TN		FALSE	TRUE	TN			FALSE	TRUE	TN		FALSE	TRUE	TN
125	GCF_000190635.1_ASM19063v1_genomic_NC_015172.1.region002.gbk	GCF_000190635.1	Syntrophobotulus glycolicus DSM 8271	#N/A	B	25		FALSE	FALSE	FALSE	FALSE		FALSE	TRUE	TN			FALSE	FALSE	TRUE	TN		FALSE	TRUE	TN			FALSE	TRUE	TN		FALSE	TRUE	TN
126	GCF_000190635.1_ASM19063v1_genomic_NC_015172.1.region004.gbk	GCF_000190635.1	Syntrophobotulus glycolicus DSM 8271	#N/A	B	26		FALSE	FALSE	FALSE	FALSE		FALSE	TRUE	TN			FALSE	FALSE	TRUE	TN		FALSE	TRUE	TN			FALSE	TRUE	TN		FALSE	TRUE	TN
127	GCF_000192865.1_ASM19286v1_genomic_NC_015276.1.region003.gbk	GCF_000192865.1	Marinomonas mediterranea MMB-1	negative	B	27		TRUE	TRUE	TRUE	FALSE		TRUE	TRUE	TP			TRUE	TRUE	TRUE	TP		TRUE	TRUE	TP			TRUE	TRUE	TP		TRUE	TRUE	TP
128	GCF_000192865.1_ASM19286v1_genomic_NC_015276.1.region005.gbk	GCF_000192865.1	Marinomonas mediterranea MMB-1	negative	B	28		TRUE	TRUE	TRUE	TRUE		FALSE	FALSE	FN	genes elsewhere	catechol genes elsewhere	TRUE	FALSE	FALSE	FN		FALSE	FALSE	FN			FALSE	FALSE	FN		TRUE	TRUE	TP
129	GCF_000195295.1_ASM19529v1_genomic_NC_015388.1.region006.gbk	GCF_000195295.1	Desulfobacca acetoxidans DSM 11109	negative	B	29		FALSE	FALSE	FALSE	FALSE		FALSE	TRUE	TN			FALSE	FALSE	TRUE	TN		FALSE	TRUE	TN			FALSE	TRUE	TN		FALSE	TRUE	TN
130	GCF_000196115.1_ASM19611v1_genomic_NC_005027.1.region004.gbk	GCF_000196115.1	Rhodopirellula baltica SH 1	negative	B	30		FALSE	FALSE	FALSE	FALSE		FALSE	TRUE	TN			FALSE	FALSE	TRUE	TN		FALSE	TRUE	TN			FALSE	TRUE	TN		FALSE	TRUE	TN
131	GCF_000196355.1_ASM19635v1_genomic_NC_007614.1.region003.gbk	GCF_000196355.1	Nitrosospira multiformis ATCC 25196	negative	B	31		TRUE	TRUE	TRUE	FALSE		TRUE	TRUE	TP			TRUE	TRUE	TRUE	TP		FALSE	FALSE	FN			TRUE	TRUE	TP		TRUE	TRUE	TP
132	GCF_000196795.1_ASM19679v1_genomic_NC_014259.1.region003.gbk	GCF_000196795.1	Acinetobacter oleivorans DR1	negative	B	32		TRUE	TRUE	TRUE	TRUE		TRUE	TRUE	TP			TRUE	TRUE	TRUE	TP		FALSE	FALSE	FN			TRUE	TRUE	TP		TRUE	TRUE	TP
133	GCF_000196795.1_ASM19679v1_genomic_NC_014259.1.region008.gbk	GCF_000196795.1	Acinetobacter oleivorans DR1	negative	B	33		FALSE	FALSE	FALSE	FALSE		FALSE	TRUE	TN			FALSE	FALSE	TRUE	TN		FALSE	TRUE	TN			FALSE	TRUE	TN		FALSE	TRUE	TN
134	GCF_000196875.2_ASM19687v2_genomic_NC_014532.2.region003.gbk	GCF_000196875.2	Halomonas elongata DSM 2581	negative	B	34		TRUE	TRUE	TRUE	TRUE		TRUE	TRUE	TP			TRUE	TRUE	TRUE	TP		TRUE	TRUE	TP			TRUE	TRUE	TP		TRUE	TRUE	TP
135	GCF_000198775.1_ASM19877v1_genomic_NC_014718.1.region001.gbk	GCF_000198775.1	Mycetohabitans rhizoxinica HKI 454	negative	B	35		FALSE	FALSE	FALSE	FALSE		FALSE	TRUE	TN			FALSE	FALSE	TRUE	TN		FALSE	TRUE	TN			FALSE	TRUE	TN		FALSE	TRUE	TN
136	GCF_000198775.1_ASM19877v1_genomic_NC_014718.1.region002.gbk	GCF_000198775.1	Mycetohabitans rhizoxinica HKI 454	negative	B	36		FALSE	FALSE	FALSE	FALSE		FALSE	TRUE	TN			FALSE	FALSE	TRUE	TN		FALSE	TRUE	TN			FALSE	TRUE	TN		FALSE	TRUE	TN
137	GCF_000198775.1_ASM19877v1_genomic_NC_014718.1.region003.gbk	GCF_000198775.1	Mycetohabitans rhizoxinica HKI 454	negative	B	37		FALSE	FALSE	FALSE	FALSE		FALSE	TRUE	TN			FALSE	FALSE	TRUE	TN		FALSE	TRUE	TN			FALSE	TRUE	TN		FALSE	TRUE	TN
138	GCF_000198775.1_ASM19877v1_genomic_NC_014718.1.region004.gbk	GCF_000198775.1	Mycetohabitans rhizoxinica HKI 454	negative	B	38		FALSE	FALSE	FALSE	FALSE		FALSE	TRUE	TN			FALSE	FALSE	TRUE	TN		FALSE	TRUE	TN			FALSE	TRUE	TN		FALSE	TRUE	TN
139	GCF_000198775.1_ASM19877v1_genomic_NC_014718.1.region005.gbk	GCF_000198775.1	Mycetohabitans rhizoxinica HKI 454	negative	B	39		FALSE	FALSE	FALSE	FALSE		FALSE	TRUE	TN			FALSE	FALSE	TRUE	TN		FALSE	TRUE	TN			FALSE	TRUE	TN		FALSE	TRUE	TN
140	GCF_000198775.1_ASM19877v1_genomic_NC_014718.1.region006.gbk	GCF_000198775.1	Mycetohabitans rhizoxinica HKI 454	negative	B	40		FALSE	FALSE	FALSE	FALSE		FALSE	TRUE	TN			FALSE	FALSE	TRUE	TN		FALSE	TRUE	TN			FALSE	TRUE	TN		FALSE	TRUE	TN
141	GCF_000198775.1_ASM19877v1_genomic_NC_014722.1.region004.gbk	GCF_000198775.1	Mycetohabitans rhizoxinica HKI 454	negative	B	41		FALSE	FALSE	FALSE	FALSE		FALSE	TRUE	TN			FALSE	FALSE	TRUE	TN		FALSE	TRUE	TN			FALSE	TRUE	TN		FALSE	TRUE	TN
142	GCF_000198775.1_ASM19877v1_genomic_NC_014722.1.region008.gbk	GCF_000198775.1	Mycetohabitans rhizoxinica HKI 454	negative	B	42		FALSE	FALSE	FALSE	FALSE		FALSE	TRUE	TN			FALSE	FALSE	TRUE	TN		FALSE	TRUE	TN			FALSE	TRUE	TN		FALSE	TRUE	TN
143	GCF_000198775.1_ASM19877v1_genomic_NC_014722.1.region009.gbk	GCF_000198775.1	Mycetohabitans rhizoxinica HKI 454	negative	B	43		FALSE	FALSE	FALSE	FALSE		FALSE	TRUE	TN			FALSE	FALSE	TRUE	TN		FALSE	TRUE	TN			FALSE	TRUE	TN		FALSE	TRUE	TN
144	GCF_000214175.1_ASM21417v1_genomic_NC_015564.1.region001.gbk	GCF_000214175.1	Hoyosella subflava DQS3-9A1	positive	B	44		TRUE	TRUE	TRUE	TRUE		TRUE	TRUE	TP			TRUE	TRUE	TRUE	TP		TRUE	TRUE	TP			TRUE	TRUE	TP		FALSE	FALSE	FN
145	GCF_000214175.1_ASM21417v1_genomic_NC_015564.1.region003.gbk	GCF_000214175.1	Hoyosella subflava DQS3-9A1	positive	B	45		FALSE	FALSE	FALSE	FALSE		FALSE	TRUE	TN			FALSE	FALSE	TRUE	TN		FALSE	TRUE	TN			FALSE	TRUE	TN		FALSE	TRUE	TN
146	GCF_000214175.1_ASM21417v1_genomic_NC_015564.1.region010.gbk	GCF_000214175.1	Hoyosella subflava DQS3-9A1	positive	B	46		FALSE	FALSE	FALSE	FALSE		FALSE	TRUE	TN			FALSE	FALSE	TRUE	TN		FALSE	TRUE	TN			FALSE	TRUE	TN		FALSE	TRUE	TN
147	GCF_000214175.1_ASM21417v1_genomic_NC_015564.1.region014.gbk	GCF_000214175.1	Hoyosella subflava DQS3-9A1	positive	B	47		FALSE	FALSE	FALSE	FALSE		FALSE	TRUE	TN			FALSE	FALSE	TRUE	TN		FALSE	TRUE	TN			FALSE	TRUE	TN		FALSE	TRUE	TN
148	GCF_000224005.2_ASM22400v3_genomic_NZ_CP007031.1.region001.gbk	GCF_000224005.2	Marichromatium purpuratum 984	negative	B	48		TRUE	FALSE	TRUE	FALSE		FALSE	FALSE	FN	genes elsewhere	salicylate genes elsewhere	TRUE	FALSE	FALSE	FN		FALSE	FALSE	FN			FALSE	FALSE	FN		TRUE	TRUE	TP
149	GCF_000224005.2_ASM22400v3_genomic_NZ_CP007031.1.region003.gbk	GCF_000224005.2	Marichromatium purpuratum 984	negative	B	49		TRUE	TRUE	FALSE	FALSE	FRAGMENT	TRUE	TRUE	TP			TRUE	TRUE	TRUE	TP		FALSE	FALSE	FN			TRUE	TRUE	TP		FALSE	FALSE	FN
150	GCF_000231385.2_ASM23138v3_genomic_NC_018515.1.region003.gbk	GCF_000231385.2	Desulfosporosinus meridiei DSM 13257	negative	B	50		FALSE	FALSE	FALSE	FALSE		FALSE	TRUE	TN			FALSE	FALSE	TRUE	TN		FALSE	TRUE	TN			FALSE	TRUE	TN		FALSE	TRUE	TN
151	GCF_000231385.2_ASM23138v3_genomic_NC_018515.1.region004.gbk	GCF_000231385.2	Desulfosporosinus meridiei DSM 13257	negative	B	51		FALSE	FALSE	FALSE	FALSE		FALSE	TRUE	TN			FALSE	FALSE	TRUE	TN		FALSE	TRUE	TN			FALSE	TRUE	TN		FALSE	TRUE	TN
152	GCF_000237085.1_ASM23708v1_genomic_NC_016627.1.region007.gbk	GCF_000237085.1	Acetivibrio clariflavus DSM 19732	variable	B	52		FALSE	FALSE	FALSE	FALSE		FALSE	TRUE	TN			FALSE	FALSE	TRUE	TN		FALSE	TRUE	TN			FALSE	TRUE	TN		FALSE	TRUE	TN
153	GCF_000242255.2_ASM24225v3_genomic_NC_017033.1.region004.gbk	GCF_000242255.2	Frateuria aurantia DSM 6220	negative	B	53		FALSE	FALSE	FALSE	FALSE		FALSE	TRUE	TN			FALSE	FALSE	TRUE	TN		FALSE	TRUE	TN			FALSE	TRUE	TN		FALSE	TRUE	TN
154	GCF_000242455.2_ASM24245v3_genomic_NC_019892.1.region002.gbk	GCF_000242455.2	Singulisphaera acidiphila DSM 18658	negative	B	54		FALSE	FALSE	FALSE	FALSE		FALSE	TRUE	TN			FALSE	FALSE	TRUE	TN		FALSE	TRUE	TN			FALSE	TRUE	TN		FALSE	TRUE	TN
155	GCF_000242455.2_ASM24245v3_genomic_NC_019892.1.region010.gbk	GCF_000242455.2	Singulisphaera acidiphila DSM 18658	negative	B	55		FALSE	FALSE	FALSE	FALSE		FALSE	TRUE	TN			FALSE	FALSE	TRUE	TN		FALSE	TRUE	TN			FALSE	TRUE	TN		FALSE	TRUE	TN
156	GCF_000246855.1_ASM24685v1_genomic_NC_016609.1.region002.gbk	GCF_000246855.1	Niastella koreensis GR20-10	negative	B	56		FALSE	FALSE	FALSE	FALSE		FALSE	TRUE	TN			FALSE	FALSE	TRUE	TN		FALSE	TRUE	TN			FALSE	TRUE	TN		TRUE	FALSE	FP
157	GCF_000247605.1_ASM24760v1_genomic_NC_016894.1.region004.gbk	GCF_000247605.1	Acetobacterium woodii DSM 1030	#N/A	B	57		FALSE	FALSE	FALSE	FALSE		FALSE	TRUE	TN			FALSE	FALSE	TRUE	TN		FALSE	TRUE	TN			FALSE	TRUE	TN		FALSE	TRUE	TN
158	GCF_000255295.1_ASM25529v1_genomic_NC_017030.1.region002.gbk	GCF_000255295.1	Corallococcus coralloides DSM 2259	positive	B	58		FALSE	FALSE	FALSE	FALSE		FALSE	TRUE	TN			FALSE	FALSE	TRUE	TN		FALSE	TRUE	TN			FALSE	TRUE	TN		FALSE	TRUE	TN
159	GCF_000255295.1_ASM25529v1_genomic_NC_017030.1.region005.gbk	GCF_000255295.1	Corallococcus coralloides DSM 2259	positive	B	59		FALSE	FALSE	FALSE	FALSE		FALSE	TRUE	TN			FALSE	FALSE	TRUE	TN		FALSE	TRUE	TN			FALSE	TRUE	TN		FALSE	TRUE	TN
160	GCF_000255295.1_ASM25529v1_genomic_NC_017030.1.region007.gbk	GCF_000255295.1	Corallococcus coralloides DSM 2259	positive	B	60		FALSE	FALSE	FALSE	FALSE		FALSE	TRUE	TN			FALSE	FALSE	TRUE	TN		FALSE	TRUE	TN			FALSE	TRUE	TN		FALSE	TRUE	TN
161	GCF_000255295.1_ASM25529v1_genomic_NC_017030.1.region009.gbk	GCF_000255295.1	Corallococcus coralloides DSM 2259	positive	B	61		FALSE	FALSE	FALSE	FALSE		FALSE	TRUE	TN			FALSE	FALSE	TRUE	TN		FALSE	TRUE	TN			FALSE	TRUE	TN		FALSE	TRUE	TN
162	GCF_000255295.1_ASM25529v1_genomic_NC_017030.1.region010.gbk	GCF_000255295.1	Corallococcus coralloides DSM 2259	positive	B	62		FALSE	FALSE	FALSE	FALSE		FALSE	TRUE	TN			FALSE	FALSE	TRUE	TN		FALSE	TRUE	TN			FALSE	TRUE	TN		FALSE	TRUE	TN
163	GCF_000255295.1_ASM25529v1_genomic_NC_017030.1.region012.gbk	GCF_000255295.1	Corallococcus coralloides DSM 2259	positive	B	63		FALSE	FALSE	FALSE	FALSE		FALSE	TRUE	TN			FALSE	FALSE	TRUE	TN		FALSE	TRUE	TN			FALSE	TRUE	TN		FALSE	TRUE	TN
164	GCF_000255295.1_ASM25529v1_genomic_NC_017030.1.region013.gbk	GCF_000255295.1	Corallococcus coralloides DSM 2259	positive	B	64		FALSE	FALSE	FALSE	FALSE		FALSE	TRUE	TN			FALSE	FALSE	TRUE	TN		FALSE	TRUE	TN			FALSE	TRUE	TN		FALSE	TRUE	TN
165	GCF_000255295.1_ASM25529v1_genomic_NC_017030.1.region016.gbk	GCF_000255295.1	Corallococcus coralloides DSM 2259	positive	B	65		FALSE	FALSE	FALSE	FALSE		FALSE	TRUE	TN			FALSE	FALSE	TRUE	TN		FALSE	TRUE	TN			FALSE	TRUE	TN		FALSE	TRUE	TN
166	GCF_000255295.1_ASM25529v1_genomic_NC_017030.1.region018.gbk	GCF_000255295.1	Corallococcus coralloides DSM 2259	positive	B	66		FALSE	FALSE	FALSE	FALSE		FALSE	TRUE	TN			FALSE	FALSE	TRUE	TN		FALSE	TRUE	TN			FALSE	TRUE	TN		FALSE	TRUE	TN
167	GCF_000255295.1_ASM25529v1_genomic_NC_017030.1.region020.gbk	GCF_000255295.1	Corallococcus coralloides DSM 2259	positive	B	67		TRUE	TRUE	TRUE	FALSE		TRUE	TRUE	TP			TRUE	TRUE	TRUE	TP		FALSE	FALSE	FN			TRUE	TRUE	TP		FALSE	FALSE	FN
168	GCF_000255295.1_ASM25529v1_genomic_NC_017030.1.region021.gbk	GCF_000255295.1	Corallococcus coralloides DSM 2259	positive	B	68		FALSE	FALSE	FALSE	FALSE		FALSE	TRUE	TN			FALSE	FALSE	TRUE	TN		FALSE	TRUE	TN			FALSE	TRUE	TN		FALSE	TRUE	TN
169	GCF_000255295.1_ASM25529v1_genomic_NC_017030.1.region028.gbk	GCF_000255295.1	Corallococcus coralloides DSM 2259	positive	B	69		FALSE	FALSE	FALSE	FALSE		FALSE	TRUE	TN			FALSE	FALSE	TRUE	TN		FALSE	TRUE	TN			FALSE	TRUE	TN		FALSE	TRUE	TN
170	GCF_000255295.1_ASM25529v1_genomic_NC_017030.1.region029.gbk	GCF_000255295.1	Corallococcus coralloides DSM 2259	positive	B	70		FALSE	FALSE	FALSE	FALSE		FALSE	TRUE	TN			FALSE	FALSE	TRUE	TN		FALSE	TRUE	TN			FALSE	TRUE	TN		FALSE	TRUE	TN
171	GCF_000258405.1_ASM25840v1_genomic_NC_017464.1.region003.gbk	GCF_000258405.1	Ignavibacterium album JCM 16511	negative	B	71		FALSE	FALSE	FALSE	FALSE		FALSE	TRUE	TN			FALSE	FALSE	TRUE	TN		FALSE	TRUE	TN			FALSE	TRUE	TN		FALSE	TRUE	TN
172	GCF_000260965.1_ASM26096v1_genomic_NC_017856.1.region003.gbk	GCF_000260965.1	Methylophaga frappieri	negative	B	72		TRUE	TRUE	TRUE	FALSE		TRUE	TRUE	TP			TRUE	TRUE	TRUE	TP		TRUE	TRUE	TP			TRUE	TRUE	TP		TRUE	TRUE	TP
173	GCF_000262305.1_ASM26230v1_genomic_NC_017910.1.region002.gbk	GCF_000262305.1	Shimwellia blattae DSM 4481 = NBRC 105725	negative	B	73		TRUE	TRUE	TRUE	TRUE		TRUE	TRUE	TP			TRUE	TRUE	TRUE	TP		TRUE	TRUE	TP			TRUE	TRUE	TP		TRUE	TRUE	TP
174	GCF_000264455.2_ASM26445v2_genomic_NC_017956.1.region003.gbk	GCF_000264455.2	Tistrella mobilis KA081020-065	negative	B	74		FALSE	FALSE	FALSE	FALSE		FALSE	TRUE	TN			FALSE	FALSE	TRUE	TN		FALSE	TRUE	TN			FALSE	TRUE	TN		FALSE	TRUE	TN
175	GCF_000264455.2_ASM26445v2_genomic_NC_017957.2.region004.gbk	GCF_000264455.2	Tistrella mobilis KA081020-065	negative	B	75		FALSE	FALSE	FALSE	FALSE		FALSE	TRUE	TN			FALSE	FALSE	TRUE	TN		FALSE	TRUE	TN			FALSE	TRUE	TN		TRUE	FALSE	FP
176	GCF_000264455.2_ASM26445v2_genomic_NC_017958.1.region003.gbk	GCF_000264455.2	Tistrella mobilis KA081020-065	negative	B	76		FALSE	FALSE	FALSE	FALSE		FALSE	TRUE	TN			FALSE	FALSE	TRUE	TN		FALSE	TRUE	TN			FALSE	TRUE	TN		FALSE	TRUE	TN
177	GCF_000264455.2_ASM26445v2_genomic_NC_017966.1.region001.gbk	GCF_000264455.2	Tistrella mobilis KA081020-065	negative	B	77		TRUE	TRUE	TRUE	TRUE		TRUE	TRUE	TP			TRUE	TRUE	TRUE	TP		TRUE	TRUE	TP			TRUE	TRUE	TP		TRUE	TRUE	TP
178	GCF_000264765.2_ASM26476v2_genomic_NZ_CP006664.1.region006.gbk	GCF_000264765.2	Edwardsiella anguillarum ET080813	negative	B	78		FALSE	FALSE	FALSE	FALSE		FALSE	TRUE	TN			FALSE	FALSE	TRUE	TN		FALSE	TRUE	TN			FALSE	TRUE	TN		FALSE	TRUE	TN
179	GCF_000265295.1_ASM26529v1_genomic_NC_018002.1.region001.gbk	GCF_000265295.1	Sulfurospirillum barnesii SES-3	negative	B	79		FALSE	FALSE	FALSE	FALSE		FALSE	TRUE	TN			FALSE	FALSE	TRUE	TN		FALSE	TRUE	TN			FALSE	TRUE	TN		FALSE	TRUE	TN
180	GCF_000269985.1_ASM26998v1_genomic_NC_016109.1.region027.gbk	GCF_000269985.1	Kitasatospora setae KM-6054	positive	B	80		FALSE	FALSE	FALSE	FALSE		FALSE	TRUE	TN			FALSE	FALSE	TRUE	TN		FALSE	TRUE	TN			FALSE	TRUE	TN		FALSE	TRUE	TN
181	GCF_000269985.1_ASM26998v1_genomic_NC_016109.1.region036.gbk	GCF_000269985.1	Kitasatospora setae KM-6054	positive	B	81		FALSE	FALSE	FALSE	FALSE		FALSE	TRUE	TN			FALSE	FALSE	TRUE	TN		FALSE	TRUE	TN			FALSE	TRUE	TN		FALSE	TRUE	TN
182	GCF_000269985.1_ASM26998v1_genomic_NC_016109.1.region039.gbk	GCF_000269985.1	Kitasatospora setae KM-6054	positive	B	82		FALSE	FALSE	FALSE	FALSE		FALSE	TRUE	TN			FALSE	FALSE	TRUE	TN		FALSE	TRUE	TN			FALSE	TRUE	TN		FALSE	TRUE	TN
183	GCF_000270245.1_ASM27024v1_genomic_NC_015635.1.region001.gbk	GCF_000270245.1	Microlunatus phosphovorus NM-1	positive	B	83		FALSE	FALSE	FALSE	FALSE		FALSE	TRUE	TN			FALSE	FALSE	TRUE	TN		FALSE	TRUE	TN			FALSE	TRUE	TN		FALSE	TRUE	TN
184	GCF_000270245.1_ASM27024v1_genomic_NC_015635.1.region003.gbk	GCF_000270245.1	Microlunatus phosphovorus NM-1	positive	B	84		TRUE	TRUE	TRUE	TRUE		TRUE	TRUE	TP			TRUE	TRUE	TRUE	TP		TRUE	TRUE	TP			TRUE	TRUE	TP		FALSE	FALSE	FN
185	GCF_000307105.1_ASM30710v1_genomic_NC_018645.1.region007.gbk	GCF_000307105.1	Desulfobacula toluolica Tol2	negative	B	85		FALSE	FALSE	FALSE	FALSE		FALSE	TRUE	TN			FALSE	FALSE	TRUE	TN		FALSE	TRUE	TN			FALSE	TRUE	TN		FALSE	TRUE	TN
186	GCF_000317105.1_ASM31710v1_genomic_NC_019693.1.region001.gbk	GCF_000317105.1	Oscillatoria acuminata PCC 6304	#N/A	B	86		FALSE	FALSE	FALSE	FALSE		FALSE	TRUE	TN			FALSE	FALSE	TRUE	TN		FALSE	TRUE	TN			FALSE	TRUE	TN		FALSE	TRUE	TN
187	GCF_000317105.1_ASM31710v1_genomic_NC_019693.1.region002.gbk	GCF_000317105.1	Oscillatoria acuminata PCC 6304	#N/A	B	87		FALSE	FALSE	FALSE	FALSE		FALSE	TRUE	TN			FALSE	FALSE	TRUE	TN		FALSE	TRUE	TN			FALSE	TRUE	TN		FALSE	TRUE	TN
188	GCF_000317105.1_ASM31710v1_genomic_NC_019693.1.region006.gbk	GCF_000317105.1	Oscillatoria acuminata PCC 6304	#N/A	B	88		TRUE	TRUE	TRUE	FALSE		TRUE	TRUE	TP			TRUE	TRUE	TRUE	TP		TRUE	TRUE	TP			TRUE	TRUE	TP		TRUE	TRUE	TP
189	GCF_000317125.1_ASM31712v1_genomic_NC_019695.1.region001.gbk	GCF_000317125.1	Chroococcidiopsis thermalis PCC 7203	negative	B	89		FALSE	FALSE	FALSE	FALSE		FALSE	TRUE	TN			FALSE	FALSE	TRUE	TN		FALSE	TRUE	TN			FALSE	TRUE	TN		FALSE	TRUE	TN
190	GCF_000317125.1_ASM31712v1_genomic_NC_019695.1.region004.gbk	GCF_000317125.1	Chroococcidiopsis thermalis PCC 7203	negative	B	90		FALSE	FALSE	FALSE	FALSE		FALSE	TRUE	TN			FALSE	FALSE	TRUE	TN		FALSE	TRUE	TN			FALSE	TRUE	TN		FALSE	TRUE	TN
191	GCF_000317125.1_ASM31712v1_genomic_NC_019695.1.region005.gbk	GCF_000317125.1	Chroococcidiopsis thermalis PCC 7203	negative	B	91		FALSE	FALSE	FALSE	FALSE		FALSE	TRUE	TN			FALSE	FALSE	TRUE	TN		FALSE	TRUE	TN			FALSE	TRUE	TN		FALSE	TRUE	TN
192	GCF_000317125.1_ASM31712v1_genomic_NC_019695.1.region008.gbk	GCF_000317125.1	Chroococcidiopsis thermalis PCC 7203	negative	B	92		FALSE	FALSE	FALSE	FALSE	coincidental transport	FALSE	TRUE	TN			FALSE	FALSE	TRUE	TN		TRUE	FALSE	FP	Coincidental transport		TRUE	FALSE	FP		TRUE	FALSE	FP
193	GCF_000317125.1_ASM31712v1_genomic_NC_019695.1.region010.gbk	GCF_000317125.1	Chroococcidiopsis thermalis PCC 7203	negative	B	93		TRUE	TRUE	TRUE	FALSE		TRUE	TRUE	TP			TRUE	TRUE	TRUE	TP		TRUE	TRUE	TP			TRUE	TRUE	TP		TRUE	TRUE	TP
194	GCF_000317125.1_ASM31712v1_genomic_NC_019695.1.region011.gbk	GCF_000317125.1	Chroococcidiopsis thermalis PCC 7203	negative	B	94		TRUE	TRUE	TRUE	FALSE		TRUE	TRUE	TP			TRUE	TRUE	TRUE	TP		TRUE	TRUE	TP			TRUE	TRUE	TP		TRUE	TRUE	TP
195	GCF_000317475.1_ASM31747v1_genomic_NC_019729.1.region002.gbk	GCF_000317475.1	Oscillatoria nigro-viridis PCC 7112	#N/A	B	95		FALSE	FALSE	FALSE	FALSE		FALSE	TRUE	TN			FALSE	FALSE	TRUE	TN		FALSE	TRUE	TN			FALSE	TRUE	TN		FALSE	TRUE	TN
196	GCF_000317475.1_ASM31747v1_genomic_NC_019729.1.region003.gbk	GCF_000317475.1	Oscillatoria nigro-viridis PCC 7112	#N/A	B	96		FALSE	FALSE	FALSE	FALSE		FALSE	TRUE	TN			FALSE	FALSE	TRUE	TN		FALSE	TRUE	TN			FALSE	TRUE	TN		FALSE	TRUE	TN
197	GCF_000317475.1_ASM31747v1_genomic_NC_019729.1.region005.gbk	GCF_000317475.1	Oscillatoria nigro-viridis PCC 7112	#N/A	B	97		TRUE	TRUE	TRUE	TRUE		TRUE	TRUE	TP			TRUE	TRUE	TRUE	TP		FALSE	FALSE	FN			TRUE	TRUE	TP		TRUE	TRUE	TP
198	GCF_000317495.1_ASM31749v1_genomic_NC_019753.1.region001.gbk	GCF_000317495.1	Crinalium epipsammum PCC 9333	#N/A	B	98		TRUE	TRUE	TRUE	TRUE		TRUE	TRUE	TP			TRUE	TRUE	TRUE	TP		FALSE	FALSE	FN			TRUE	TRUE	TP		TRUE	TRUE	TP
199	GCF_000317495.1_ASM31749v1_genomic_NC_019753.1.region002.gbk	GCF_000317495.1	Crinalium epipsammum PCC 9333	#N/A	B	99		FALSE	FALSE	FALSE	FALSE		FALSE	TRUE	TN			FALSE	FALSE	TRUE	TN		FALSE	TRUE	TN			FALSE	TRUE	TN		FALSE	TRUE	TN
200	GCF_000317495.1_ASM31749v1_genomic_NC_019753.1.region004.gbk	GCF_000317495.1	Crinalium epipsammum PCC 9333	#N/A	B	100		FALSE	FALSE	FALSE	FALSE		FALSE	TRUE	TN			FALSE	FALSE	TRUE	TN		FALSE	TRUE	TN			FALSE	TRUE	TN		FALSE	TRUE	TN
201	GCF_000317515.1_ASM31751v1_genomic_NC_019738.1.region002.gbk	GCF_000317515.1	Allocoleopsis franciscana PCC 7113	#N/A	C	1		TRUE	TRUE	TRUE	FALSE		TRUE	TRUE	TP			TRUE	TRUE	TRUE	TP		TRUE	TRUE	TP			TRUE	TRUE	TP		TRUE	TRUE	TP
202	GCF_000317515.1_ASM31751v1_genomic_NC_019738.1.region003.gbk	GCF_000317515.1	Allocoleopsis franciscana PCC 7113	#N/A	C	2		FALSE	FALSE	FALSE	FALSE		FALSE	TRUE	TN			FALSE	FALSE	TRUE	TN		FALSE	TRUE	TN			FALSE	TRUE	TN		FALSE	TRUE	TN
203	GCF_000317575.1_ASM31757v1_genomic_NC_019748.1.region010.gbk	GCF_000317575.1	Stanieria cyanosphaera PCC 7437	#N/A	C	3		TRUE	TRUE	TRUE	FALSE		TRUE	TRUE	TP			TRUE	TRUE	TRUE	TP		TRUE	TRUE	TP			TRUE	TRUE	TP		TRUE	TRUE	TP
204	GCF_000317615.1_ASM31761v1_genomic_NC_019780.1.region002.gbk	GCF_000317615.1	Dactylococcopsis salina PCC 8305	#N/A	C	4		FALSE	FALSE	FALSE	FALSE		FALSE	TRUE	TN			FALSE	FALSE	TRUE	TN		FALSE	TRUE	TN			FALSE	TRUE	TN		FALSE	TRUE	TN
205	GCF_000317695.1_ASM31769v1_genomic_NC_019771.1.region004.gbk	GCF_000317695.1	Anabaena cylindrica PCC 7122	#N/A	C	5		FALSE	FALSE	FALSE	FALSE		FALSE	TRUE	TN			FALSE	FALSE	TRUE	TN		FALSE	TRUE	TN			FALSE	TRUE	TN		FALSE	TRUE	TN
206	GCF_000317695.1_ASM31769v1_genomic_NC_019771.1.region005.gbk	GCF_000317695.1	Anabaena cylindrica PCC 7122	#N/A	C	6		FALSE	FALSE	FALSE	FALSE		FALSE	TRUE	TN			FALSE	FALSE	TRUE	TN		FALSE	TRUE	TN			FALSE	TRUE	TN		FALSE	TRUE	TN
207	GCF_000317695.1_ASM31769v1_genomic_NC_019771.1.region006.gbk	GCF_000317695.1	Anabaena cylindrica PCC 7122	#N/A	C	7		FALSE	FALSE	FALSE	FALSE		FALSE	TRUE	TN			FALSE	FALSE	TRUE	TN		FALSE	TRUE	TN			FALSE	TRUE	TN		FALSE	TRUE	TN
208	GCF_000317695.1_ASM31769v1_genomic_NC_019771.1.region009.gbk	GCF_000317695.1	Anabaena cylindrica PCC 7122	#N/A	C	8		FALSE	FALSE	FALSE	FALSE		FALSE	TRUE	TN			FALSE	FALSE	TRUE	TN		FALSE	TRUE	TN			FALSE	TRUE	TN		FALSE	TRUE	TN
209	GCF_000317695.1_ASM31769v1_genomic_NC_019771.1.region015.gbk	GCF_000317695.1	Anabaena cylindrica PCC 7122	#N/A	C	9		TRUE	TRUE	TRUE	FALSE		TRUE	TRUE	TP			TRUE	TRUE	TRUE	TP		TRUE	TRUE	TP			TRUE	TRUE	TP		TRUE	TRUE	TP
210	GCF_000319385.1_ASM31938v1_genomic_NC_019566.1.region003.gbk	GCF_000319385.1	Candidatus Endolissoclinum faulkneri L2	negative	C	10		FALSE	FALSE	FALSE	FALSE		FALSE	TRUE	TN			FALSE	FALSE	TRUE	TN		FALSE	TRUE	TN			FALSE	TRUE	TN		FALSE	TRUE	TN
211	GCF_000331735.1_ASM33173v1_genomic_NC_020126.1.region002.gbk	GCF_000331735.1	Myxococcus stipitatus DSM 14675	negative	C	11		FALSE	FALSE	FALSE	FALSE		FALSE	TRUE	TN			FALSE	FALSE	TRUE	TN		FALSE	TRUE	TN			FALSE	TRUE	TN		FALSE	TRUE	TN
212	GCF_000331735.1_ASM33173v1_genomic_NC_020126.1.region004.gbk	GCF_000331735.1	Myxococcus stipitatus DSM 14675	negative	C	12		FALSE	FALSE	FALSE	FALSE		FALSE	TRUE	TN			FALSE	FALSE	TRUE	TN		FALSE	TRUE	TN			FALSE	TRUE	TN		FALSE	TRUE	TN
213	GCF_000331735.1_ASM33173v1_genomic_NC_020126.1.region007.gbk	GCF_000331735.1	Myxococcus stipitatus DSM 14675	negative	C	13		FALSE	FALSE	FALSE	FALSE		FALSE	TRUE	TN			FALSE	FALSE	TRUE	TN		FALSE	TRUE	TN			FALSE	TRUE	TN		FALSE	TRUE	TN
214	GCF_000331735.1_ASM33173v1_genomic_NC_020126.1.region008.gbk	GCF_000331735.1	Myxococcus stipitatus DSM 14675	negative	C	14		FALSE	FALSE	FALSE	FALSE		FALSE	TRUE	TN			FALSE	FALSE	TRUE	TN		FALSE	TRUE	TN			FALSE	TRUE	TN		FALSE	TRUE	TN
215	GCF_000331735.1_ASM33173v1_genomic_NC_020126.1.region009.gbk	GCF_000331735.1	Myxococcus stipitatus DSM 14675	negative	C	15		FALSE	FALSE	FALSE	FALSE		FALSE	TRUE	TN			FALSE	FALSE	TRUE	TN		FALSE	TRUE	TN			FALSE	TRUE	TN		FALSE	TRUE	TN
216	GCF_000331735.1_ASM33173v1_genomic_NC_020126.1.region011.gbk	GCF_000331735.1	Myxococcus stipitatus DSM 14675	negative	C	16		FALSE	FALSE	FALSE	FALSE		FALSE	TRUE	TN			FALSE	FALSE	TRUE	TN		FALSE	TRUE	TN			FALSE	TRUE	TN		FALSE	TRUE	TN
217	GCF_000331735.1_ASM33173v1_genomic_NC_020126.1.region013.gbk	GCF_000331735.1	Myxococcus stipitatus DSM 14675	negative	C	17		FALSE	FALSE	FALSE	FALSE		FALSE	TRUE	TN			FALSE	FALSE	TRUE	TN		FALSE	TRUE	TN			FALSE	TRUE	TN		FALSE	TRUE	TN
218	GCF_000331735.1_ASM33173v1_genomic_NC_020126.1.region014.gbk	GCF_000331735.1	Myxococcus stipitatus DSM 14675	negative	C	18		FALSE	FALSE	FALSE	FALSE		FALSE	TRUE	TN			FALSE	FALSE	TRUE	TN		FALSE	TRUE	TN			FALSE	TRUE	TN		FALSE	TRUE	TN
219	GCF_000331735.1_ASM33173v1_genomic_NC_020126.1.region016.gbk	GCF_000331735.1	Myxococcus stipitatus DSM 14675	negative	C	19		TRUE	TRUE	TRUE	FALSE		TRUE	TRUE	TP			TRUE	TRUE	TRUE	TP		FALSE	FALSE	FN			TRUE	TRUE	TP		TRUE	TRUE	TP
220	GCF_000331735.1_ASM33173v1_genomic_NC_020126.1.region020.gbk	GCF_000331735.1	Myxococcus stipitatus DSM 14675	negative	C	20		FALSE	FALSE	FALSE	FALSE		FALSE	TRUE	TN			FALSE	FALSE	TRUE	TN		FALSE	TRUE	TN			FALSE	TRUE	TN		FALSE	TRUE	TN
221	GCF_000331735.1_ASM33173v1_genomic_NC_020126.1.region021.gbk	GCF_000331735.1	Myxococcus stipitatus DSM 14675	negative	C	21		FALSE	FALSE	FALSE	FALSE		FALSE	TRUE	TN			FALSE	FALSE	TRUE	TN		FALSE	TRUE	TN			FALSE	TRUE	TN		FALSE	TRUE	TN
222	GCF_000331735.1_ASM33173v1_genomic_NC_020126.1.region024.gbk	GCF_000331735.1	Myxococcus stipitatus DSM 14675	negative	C	22		FALSE	FALSE	FALSE	FALSE		FALSE	TRUE	TN			FALSE	FALSE	TRUE	TN		FALSE	TRUE	TN			FALSE	TRUE	TN		FALSE	TRUE	TN
223	GCF_000331735.1_ASM33173v1_genomic_NC_020126.1.region025.gbk	GCF_000331735.1	Myxococcus stipitatus DSM 14675	negative	C	23		FALSE	FALSE	FALSE	FALSE		FALSE	TRUE	TN			FALSE	FALSE	TRUE	TN		FALSE	TRUE	TN			FALSE	TRUE	TN		FALSE	TRUE	TN
224	GCF_000340885.1_ASM34088v1_genomic_NC_020291.1.region003.gbk	GCF_000340885.1	Clostridium saccharoperbutylacetonicum N1-4(HMT)	negative	C	24		FALSE	FALSE	FALSE	FALSE		FALSE	TRUE	TN			FALSE	FALSE	TRUE	TN		FALSE	TRUE	TN			FALSE	TRUE	TN		FALSE	TRUE	TN
225	GCF_000340885.1_ASM34088v1_genomic_NC_020291.1.region007.gbk	GCF_000340885.1	Clostridium saccharoperbutylacetonicum N1-4(HMT)	negative	C	25		FALSE	FALSE	FALSE	FALSE		FALSE	TRUE	TN			FALSE	FALSE	TRUE	TN		FALSE	TRUE	TN			FALSE	TRUE	TN		FALSE	TRUE	TN
226	GCF_000340885.1_ASM34088v1_genomic_NC_020291.1.region009.gbk	GCF_000340885.1	Clostridium saccharoperbutylacetonicum N1-4(HMT)	negative	C	26		FALSE	FALSE	FALSE	FALSE		FALSE	TRUE	TN			FALSE	FALSE	TRUE	TN		FALSE	TRUE	TN			FALSE	TRUE	TN		FALSE	TRUE	TN
227	GCF_000340885.1_ASM34088v1_genomic_NC_020291.1.region010.gbk	GCF_000340885.1	Clostridium saccharoperbutylacetonicum N1-4(HMT)	negative	C	27		FALSE	FALSE	FALSE	FALSE		FALSE	TRUE	TN			FALSE	FALSE	TRUE	TN		FALSE	TRUE	TN			FALSE	TRUE	TN		FALSE	TRUE	TN
228	GCF_000340885.1_ASM34088v1_genomic_NC_020291.1.region011.gbk	GCF_000340885.1	Clostridium saccharoperbutylacetonicum N1-4(HMT)	negative	C	28		FALSE	FALSE	FALSE	FALSE		FALSE	TRUE	TN			FALSE	FALSE	TRUE	TN		FALSE	TRUE	TN			FALSE	TRUE	TN		FALSE	TRUE	TN
229	GCF_000402035.1_ASM40203v1_genomic_NC_021288.1.region002.gbk	GCF_000402035.1	Caballeronia insecticola	negative	C	29		FALSE	FALSE	FALSE	FALSE		FALSE	TRUE	TN			FALSE	FALSE	TRUE	TN		FALSE	TRUE	TN			FALSE	TRUE	TN		FALSE	TRUE	TN
230	GCF_000402035.1_ASM40203v1_genomic_NC_021289.1.region001.gbk	GCF_000402035.1	Caballeronia insecticola	negative	C	30		TRUE	TRUE	TRUE	TRUE		TRUE	TRUE	TP			TRUE	TRUE	TRUE	TP		TRUE	TRUE	TP			TRUE	TRUE	TP		TRUE	TRUE	TP
231	GCF_000441555.1_ASM44155v1_genomic_NC_021885.1.region002.gbk	GCF_000441555.1	Candidatus Profftella armatura	negative	C	31		FALSE	FALSE	FALSE	FALSE		FALSE	TRUE	TN			FALSE	FALSE	TRUE	TN		FALSE	TRUE	TN			FALSE	TRUE	TN		FALSE	TRUE	TN
232	GCF_000478885.1_ASM47888v1_genomic_NC_022567.1.region001.gbk	GCF_000478885.1	Adlercreutzia equolifaciens DSM 19450	negative	C	32		TRUE	TRUE	TRUE	FALSE		FALSE	FALSE	FN	genes missing	salicylate genes missing - mention equibactin	TRUE	FALSE	FALSE	FN		FALSE	FALSE	FN			FALSE	FALSE	FN		FALSE	FALSE	FN
233	GCF_000484535.1_ASM48453v1_genomic_NC_022600.1.region005.gbk	GCF_000484535.1	Gloeobacter kilaueensis JS1	#N/A	C	33		FALSE	FALSE	FALSE	FALSE		FALSE	TRUE	TN			FALSE	FALSE	TRUE	TN		FALSE	TRUE	TN			FALSE	TRUE	TN		FALSE	TRUE	TN
234	GCF_000484535.1_ASM48453v1_genomic_NC_022600.1.region006.gbk	GCF_000484535.1	Gloeobacter kilaueensis JS1	#N/A	C	34		FALSE	FALSE	FALSE	FALSE		FALSE	TRUE	TN			FALSE	FALSE	TRUE	TN		FALSE	TRUE	TN			FALSE	TRUE	TN		FALSE	TRUE	TN
235	GCF_000494755.1_ASM49475v1_genomic_NC_022657.1.region003.gbk	GCF_000494755.1	Actinoplanes friuliensis DSM 7358	positive	C	35		FALSE	FALSE	FALSE	FALSE		FALSE	TRUE	TN			FALSE	FALSE	TRUE	TN		FALSE	TRUE	TN			FALSE	TRUE	TN		FALSE	TRUE	TN
236	GCF_000494755.1_ASM49475v1_genomic_NC_022657.1.region005.gbk	GCF_000494755.1	Actinoplanes friuliensis DSM 7358	positive	C	36		FALSE	FALSE	FALSE	FALSE		FALSE	TRUE	TN			FALSE	FALSE	TRUE	TN		FALSE	TRUE	TN			FALSE	TRUE	TN		FALSE	TRUE	TN
237	GCF_000494755.1_ASM49475v1_genomic_NC_022657.1.region007.gbk	GCF_000494755.1	Actinoplanes friuliensis DSM 7358	positive	C	37		TRUE	FALSE	TRUE	FALSE	expected false negative	FALSE	FALSE	FN	genes elsewhere	hydroxamate genes elsewhere	TRUE	FALSE	FALSE	FN		TRUE	TRUE	TP			TRUE	TRUE	TP		FALSE	FALSE	FN
238	GCF_000494755.1_ASM49475v1_genomic_NC_022657.1.region008.gbk	GCF_000494755.1	Actinoplanes friuliensis DSM 7358	positive	C	38		FALSE	FALSE	FALSE	FALSE		FALSE	TRUE	TN			FALSE	FALSE	TRUE	TN		FALSE	TRUE	TN			FALSE	TRUE	TN		FALSE	TRUE	TN
239	GCF_000494755.1_ASM49475v1_genomic_NC_022657.1.region009.gbk	GCF_000494755.1	Actinoplanes friuliensis DSM 7358	positive	C	39		FALSE	FALSE	FALSE	FALSE		FALSE	TRUE	TN			FALSE	FALSE	TRUE	TN		FALSE	TRUE	TN			FALSE	TRUE	TN		FALSE	TRUE	TN
240	GCF_000513295.1_MGMSRv2_genomic_NC_023065.1.region004.gbk	GCF_000513295.1	Magnetospirillum gryphiswaldense MSR-1 v2	negative	C	40		FALSE	FALSE	FALSE	FALSE		FALSE	TRUE	TN			FALSE	FALSE	TRUE	TN		FALSE	TRUE	TN			FALSE	TRUE	TN		FALSE	TRUE	TN
241	GCF_000520015.2_ASM52001v2_genomic_NZ_CP007044.2.region001.gbk	GCF_000520015.2	Chania multitudinisentens RB-25	negative	C	41		FALSE	FALSE	FALSE	FALSE		FALSE	TRUE	TN			FALSE	FALSE	TRUE	TN		FALSE	TRUE	TN			FALSE	TRUE	TN		FALSE	TRUE	TN
242	GCF_000520015.2_ASM52001v2_genomic_NZ_CP007044.2.region005.gbk	GCF_000520015.2	Chania multitudinisentens RB-25	negative	C	42		TRUE	TRUE	TRUE	TRUE		TRUE	TRUE	TP			TRUE	TRUE	TRUE	TP		TRUE	TRUE	TP			TRUE	TRUE	TP		TRUE	TRUE	TP
243	GCF_000520015.2_ASM52001v2_genomic_NZ_CP007044.2.region006.gbk	GCF_000520015.2	Chania multitudinisentens RB-25	negative	C	43		FALSE	FALSE	FALSE	FALSE		FALSE	TRUE	TN			FALSE	FALSE	TRUE	TN		FALSE	TRUE	TN			FALSE	TRUE	TN		FALSE	TRUE	TN
244	GCF_000520015.2_ASM52001v2_genomic_NZ_CP007044.2.region007.gbk	GCF_000520015.2	Chania multitudinisentens RB-25	negative	C	44		FALSE	FALSE	FALSE	FALSE		FALSE	TRUE	TN			FALSE	FALSE	TRUE	TN		FALSE	TRUE	TN			FALSE	TRUE	TN		FALSE	TRUE	TN
245	GCF_000522985.1_ASM52298v1_genomic_NZ_CP007128.1.region001.gbk	GCF_000522985.1	Gemmatirosa kalamazoonesis	#N/A	C	45		FALSE	FALSE	FALSE	FALSE		FALSE	TRUE	TN			FALSE	FALSE	TRUE	TN		FALSE	TRUE	TN			FALSE	TRUE	TN		FALSE	TRUE	TN
246	GCF_000522985.1_ASM52298v1_genomic_NZ_CP007130.1.region001.gbk	GCF_000522985.1	Gemmatirosa kalamazoonesis	#N/A	C	46		FALSE	FALSE	FALSE	FALSE	MAYBE: Has TauD and many Asps	FALSE	TRUE	TN			FALSE	FALSE	TRUE	TN		FALSE	TRUE	TN			FALSE	TRUE	TN		TRUE	FALSE	FP
247	GCF_000590925.1_ASM59092v1_genomic_NZ_CP004372.1.region005.gbk	GCF_000590925.1	Roseibacterium elongatum DSM 19469	#N/A	C	47		FALSE	FALSE	FALSE	FALSE		FALSE	TRUE	TN			FALSE	FALSE	TRUE	TN		FALSE	TRUE	TN			FALSE	TRUE	TN		FALSE	TRUE	TN
248	GCF_000599985.1_ASM59998v1_genomic_NZ_CP007445.1.region001.gbk	GCF_000599985.1	Gilliamella apicola	negative	C	48		FALSE	FALSE	FALSE	FALSE		FALSE	TRUE	TN			FALSE	FALSE	TRUE	TN		FALSE	TRUE	TN			FALSE	TRUE	TN		FALSE	TRUE	TN
249	GCF_000723165.1_JAG1_genomic_NZ_HG322949.1.region001.gbk	GCF_000723165.1	Janthinobacterium agaricidamnosum NBRC 102515 = DSM 9628	negative	C	49		FALSE	FALSE	FALSE	FALSE		FALSE	TRUE	TN			FALSE	FALSE	TRUE	TN		FALSE	TRUE	TN			FALSE	TRUE	TN		FALSE	TRUE	TN
250	GCF_000723165.1_JAG1_genomic_NZ_HG322949.1.region004.gbk	GCF_000723165.1	Janthinobacterium agaricidamnosum NBRC 102515 = DSM 9628	negative	C	50		FALSE	FALSE	FALSE	FALSE		FALSE	TRUE	TN			FALSE	FALSE	TRUE	TN		FALSE	TRUE	TN			FALSE	TRUE	TN		FALSE	TRUE	TN
251	GCF_000723165.1_JAG1_genomic_NZ_HG322949.1.region005.gbk	GCF_000723165.1	Janthinobacterium agaricidamnosum NBRC 102515 = DSM 9628	negative	C	51		TRUE	TRUE	TRUE	FALSE		TRUE	TRUE	TP			TRUE	TRUE	TRUE	TP		FALSE	FALSE	FN			TRUE	TRUE	TP		TRUE	TRUE	TP
252	GCF_000723165.1_JAG1_genomic_NZ_HG322949.1.region008.gbk	GCF_000723165.1	Janthinobacterium agaricidamnosum NBRC 102515 = DSM 9628	negative	C	52		TRUE	TRUE	TRUE	TRUE		TRUE	TRUE	TP			TRUE	TRUE	TRUE	TP		TRUE	TRUE	TP			TRUE	TRUE	TP		TRUE	TRUE	TP
253	GCF_000723165.1_JAG1_genomic_NZ_HG322949.1.region010.gbk	GCF_000723165.1	Janthinobacterium agaricidamnosum NBRC 102515 = DSM 9628	negative	C	53		FALSE	FALSE	FALSE	FALSE		TRUE	FALSE	FP	questionable hits	IBH_Asp false catch	FALSE	TRUE	FALSE	FP		FALSE	TRUE	TN			TRUE	FALSE	FP		FALSE	TRUE	TN
254	GCF_000730165.1_ASM73016v2_genomic_NZ_CP022112.1.region006.gbk	GCF_000730165.1	Nitrospirillum amazonense CBAmc	negative	C	54		TRUE	TRUE	TRUE	FALSE		TRUE	TRUE	TP			TRUE	TRUE	TRUE	TP		FALSE	FALSE	FN			TRUE	TRUE	TP		TRUE	TRUE	TP
255	GCF_000730165.1_ASM73016v2_genomic_NZ_CP022113.1.region001.gbk	GCF_000730165.1	Nitrospirillum amazonense CBAmc	negative	C	55		FALSE	FALSE	FALSE	FALSE	Has TonB, TauD, feels no	FALSE	TRUE	TN			FALSE	FALSE	TRUE	TN		FALSE	TRUE	TN			FALSE	TRUE	TN		TRUE	FALSE	FP
256	GCF_000732925.1_ASM73292v1_genomic_NZ_CP008953.1.region006.gbk	GCF_000732925.1	Amycolatopsis japonica	positive	C	56		FALSE	FALSE	FALSE	FALSE		FALSE	TRUE	TN			FALSE	FALSE	TRUE	TN		FALSE	TRUE	TN			FALSE	TRUE	TN		FALSE	TRUE	TN
257	GCF_000732925.1_ASM73292v1_genomic_NZ_CP008953.1.region010.gbk	GCF_000732925.1	Amycolatopsis japonica	positive	C	57		FALSE	FALSE	FALSE	FALSE		FALSE	TRUE	TN			FALSE	FALSE	TRUE	TN		FALSE	TRUE	TN			FALSE	TRUE	TN		FALSE	TRUE	TN
258	GCF_000732925.1_ASM73292v1_genomic_NZ_CP008953.1.region014.gbk	GCF_000732925.1	Amycolatopsis japonica	positive	C	58		FALSE	FALSE	FALSE	FALSE		FALSE	TRUE	TN			FALSE	FALSE	TRUE	TN		FALSE	TRUE	TN			FALSE	TRUE	TN		FALSE	TRUE	TN
259	GCF_000732925.1_ASM73292v1_genomic_NZ_CP008953.1.region015.gbk	GCF_000732925.1	Amycolatopsis japonica	positive	C	59		TRUE	TRUE	TRUE	FALSE		TRUE	TRUE	TP			TRUE	TRUE	TRUE	TP		TRUE	TRUE	TP			TRUE	TRUE	TP		FALSE	FALSE	FN
260	GCF_000732925.1_ASM73292v1_genomic_NZ_CP008953.1.region016.gbk	GCF_000732925.1	Amycolatopsis japonica	positive	C	60		TRUE	TRUE	TRUE	TRUE		TRUE	TRUE	TP			TRUE	TRUE	TRUE	TP		TRUE	TRUE	TP			TRUE	TRUE	TP		FALSE	FALSE	FN
261	GCF_000732925.1_ASM73292v1_genomic_NZ_CP008953.1.region018.gbk	GCF_000732925.1	Amycolatopsis japonica	positive	C	61		FALSE	FALSE	FALSE	FALSE		FALSE	TRUE	TN			FALSE	FALSE	TRUE	TN		FALSE	TRUE	TN			FALSE	TRUE	TN		FALSE	TRUE	TN
262	GCF_000732925.1_ASM73292v1_genomic_NZ_CP008953.1.region024.gbk	GCF_000732925.1	Amycolatopsis japonica	positive	C	62		FALSE	FALSE	FALSE	FALSE		FALSE	TRUE	TN			FALSE	FALSE	TRUE	TN		FALSE	TRUE	TN			FALSE	TRUE	TN		FALSE	TRUE	TN
263	GCF_000737325.1_ASM73732v2_genomic_NZ_CP011125.1.region009.gbk	GCF_000737325.1	Sandaracinus amylolyticus	negative	C	63		FALSE	FALSE	FALSE	FALSE		FALSE	TRUE	TN			FALSE	FALSE	TRUE	TN		FALSE	TRUE	TN			FALSE	TRUE	TN		FALSE	TRUE	TN
264	GCF_000737325.1_ASM73732v2_genomic_NZ_CP011125.1.region014.gbk	GCF_000737325.1	Sandaracinus amylolyticus	negative	C	64		TRUE	TRUE	TRUE	TRUE		TRUE	TRUE	TP			TRUE	TRUE	TRUE	TP		FALSE	FALSE	FN			TRUE	TRUE	TP		TRUE	TRUE	TP
265	GCF_000737325.1_ASM73732v2_genomic_NZ_CP011125.1.region016.gbk	GCF_000737325.1	Sandaracinus amylolyticus	negative	C	65		FALSE	FALSE	FALSE	FALSE		FALSE	TRUE	TN			FALSE	FALSE	TRUE	TN		FALSE	TRUE	TN			FALSE	TRUE	TN		FALSE	TRUE	TN
266	GCF_000742835.1_ASM74283v1_genomic_NZ_CP008941.1.region003.gbk	GCF_000742835.1	Candidatus Paracaedibacter acanthamoebae	negative	C	66		FALSE	FALSE	FALSE	FALSE		FALSE	TRUE	TN			FALSE	FALSE	TRUE	TN		FALSE	TRUE	TN			FALSE	TRUE	TN		FALSE	TRUE	TN
267	GCF_000758705.1_ASM75870v1_genomic_NZ_CP009287.1.region001.gbk	GCF_000758705.1	Paenibacillus graminis	positive	C	67		FALSE	FALSE	FALSE	FALSE		FALSE	TRUE	TN			FALSE	FALSE	TRUE	TN		FALSE	TRUE	TN			FALSE	TRUE	TN		FALSE	TRUE	TN
268	GCF_000758705.1_ASM75870v1_genomic_NZ_CP009287.1.region004.gbk	GCF_000758705.1	Paenibacillus graminis	positive	C	68		FALSE	FALSE	FALSE	FALSE		FALSE	TRUE	TN			FALSE	FALSE	TRUE	TN		FALSE	TRUE	TN			FALSE	TRUE	TN		FALSE	TRUE	TN
269	GCF_000758705.1_ASM75870v1_genomic_NZ_CP009287.1.region005.gbk	GCF_000758705.1	Paenibacillus graminis	positive	C	69		FALSE	FALSE	FALSE	FALSE		FALSE	TRUE	TN			FALSE	FALSE	TRUE	TN		FALSE	TRUE	TN			FALSE	TRUE	TN		FALSE	TRUE	TN
270	GCF_000758705.1_ASM75870v1_genomic_NZ_CP009287.1.region012.gbk	GCF_000758705.1	Paenibacillus graminis	positive	C	70		FALSE	FALSE	FALSE	FALSE	has transport, nothing else	FALSE	TRUE	TN			FALSE	FALSE	TRUE	TN		TRUE	FALSE	FP	coincidental transport		TRUE	FALSE	FP		FALSE	TRUE	TN
271	GCF_000763575.1_ASM76357v1_genomic_NZ_CP009170.1.region004.gbk	GCF_000763575.1	Thermoanaerobacter kivui	negative	C	71		FALSE	FALSE	FALSE	FALSE		FALSE	TRUE	TN			FALSE	FALSE	TRUE	TN		FALSE	TRUE	TN			FALSE	TRUE	TN		FALSE	TRUE	TN
272	GCF_000767465.1_ASM76746v1_genomic_NZ_CP009291.1.region002.gbk	GCF_000767465.1	Novosphingobium pentaromativorans US6-1	negative	C	72		TRUE	FALSE	TRUE	FALSE	NOVEL? has transport, feels siderophore	FALSE	FALSE	FN	novel synth	If siderophore, is novel	TRUE	FALSE	FALSE	FN		TRUE	TRUE	TP			TRUE	TRUE	TP		FALSE	FALSE	FN
273	GCF_000807275.1_ASM80727v1_genomic_NZ_CP009056.1.region001.gbk	GCF_000807275.1	Frischella perrara	negative	C	73		FALSE	FALSE	FALSE	FALSE		FALSE	TRUE	TN			FALSE	FALSE	TRUE	TN		FALSE	TRUE	TN			FALSE	TRUE	TN		FALSE	TRUE	TN
274	GCF_000819565.1_ASM81956v1_genomic_NZ_CP004393.1.region003.gbk	GCF_000819565.1	Celeribacter indicus	negative	C	74		TRUE	FALSE	TRUE	FALSE		FALSE	FALSE	FN	genes missing	enterobactin, no cat genes in genome	TRUE	FALSE	FALSE	FN		TRUE	TRUE	TP			TRUE	TRUE	TP		TRUE	TRUE	TP
275	GCF_000940805.1_ASM94080v1_genomic_NZ_CP007142.1.region002.gbk	GCF_000940805.1	Gynuella sunshinyii YC6258	negative	C	75		FALSE	FALSE	FALSE	FALSE		FALSE	TRUE	TN			FALSE	FALSE	TRUE	TN		FALSE	TRUE	TN			FALSE	TRUE	TN		FALSE	TRUE	TN
276	GCF_000940805.1_ASM94080v1_genomic_NZ_CP007142.1.region004.gbk	GCF_000940805.1	Gynuella sunshinyii YC6258	negative	C	76		FALSE	FALSE	FALSE	FALSE		FALSE	TRUE	TN			FALSE	FALSE	TRUE	TN		FALSE	TRUE	TN			FALSE	TRUE	TN		FALSE	TRUE	TN
277	GCF_000940805.1_ASM94080v1_genomic_NZ_CP007142.1.region005.gbk	GCF_000940805.1	Gynuella sunshinyii YC6258	negative	C	77		FALSE	FALSE	FALSE	FALSE		FALSE	TRUE	TN			FALSE	FALSE	TRUE	TN		FALSE	TRUE	TN			FALSE	TRUE	TN		FALSE	TRUE	TN
278	GCF_000940805.1_ASM94080v1_genomic_NZ_CP007142.1.region006.gbk	GCF_000940805.1	Gynuella sunshinyii YC6258	negative	C	78		TRUE	FALSE	TRUE	TRUE		FALSE	FALSE	FN	genes elsewhere	catechol genes elsewhere	TRUE	FALSE	FALSE	FN		FALSE	FALSE	FN			FALSE	FALSE	FN		TRUE	TRUE	TP
279	GCF_000940805.1_ASM94080v1_genomic_NZ_CP007142.1.region008.gbk	GCF_000940805.1	Gynuella sunshinyii YC6258	negative	C	79		FALSE	FALSE	FALSE	FALSE		FALSE	TRUE	TN			FALSE	FALSE	TRUE	TN		FALSE	TRUE	TN			FALSE	TRUE	TN		FALSE	TRUE	TN
280	GCF_000940805.1_ASM94080v1_genomic_NZ_CP007142.1.region009.gbk	GCF_000940805.1	Gynuella sunshinyii YC6258	negative	C	80		TRUE	TRUE	FALSE	FALSE		TRUE	TRUE	TP			TRUE	TRUE	TRUE	TP		FALSE	FALSE	FN			TRUE	TRUE	TP		FALSE	FALSE	FN
281	GCF_000940805.1_ASM94080v1_genomic_NZ_CP007142.1.region010.gbk	GCF_000940805.1	Gynuella sunshinyii YC6258	negative	C	81		FALSE	FALSE	FALSE	FALSE		FALSE	TRUE	TN			FALSE	FALSE	TRUE	TN		FALSE	TRUE	TN			FALSE	TRUE	TN		FALSE	TRUE	TN
282	GCF_000940805.1_ASM94080v1_genomic_NZ_CP007142.1.region012.gbk	GCF_000940805.1	Gynuella sunshinyii YC6258	negative	C	82		FALSE	FALSE	FALSE	FALSE		FALSE	TRUE	TN			FALSE	FALSE	TRUE	TN		FALSE	TRUE	TN			FALSE	TRUE	TN		FALSE	TRUE	TN
283	GCF_000940805.1_ASM94080v1_genomic_NZ_CP007142.1.region015.gbk	GCF_000940805.1	Gynuella sunshinyii YC6258	negative	C	83		FALSE	FALSE	FALSE	FALSE		FALSE	TRUE	TN			FALSE	FALSE	TRUE	TN		FALSE	TRUE	TN			FALSE	TRUE	TN		FALSE	TRUE	TN
284	GCF_000940805.1_ASM94080v1_genomic_NZ_CP007142.1.region016.gbk	GCF_000940805.1	Gynuella sunshinyii YC6258	negative	C	84		FALSE	FALSE	FALSE	FALSE		FALSE	TRUE	TN			FALSE	FALSE	TRUE	TN		FALSE	TRUE	TN			FALSE	TRUE	TN		FALSE	TRUE	TN
285	GCF_000940805.1_ASM94080v1_genomic_NZ_CP007142.1.region017.gbk	GCF_000940805.1	Gynuella sunshinyii YC6258	negative	C	85		FALSE	FALSE	FALSE	FALSE		FALSE	TRUE	TN			FALSE	FALSE	TRUE	TN		FALSE	TRUE	TN			FALSE	TRUE	TN		FALSE	TRUE	TN
286	GCF_000940805.1_ASM94080v1_genomic_NZ_CP007142.1.region018.gbk	GCF_000940805.1	Gynuella sunshinyii YC6258	negative	C	86		FALSE	FALSE	FALSE	FALSE		FALSE	TRUE	TN			FALSE	FALSE	TRUE	TN		FALSE	TRUE	TN			FALSE	TRUE	TN		FALSE	TRUE	TN
287	GCF_000940995.1_ASM94099v1_genomic_NZ_CP005973.1.region001.gbk	GCF_000940995.1	Photobacterium gaetbulicola Gung47	negative	C	87		FALSE	FALSE	FALSE	FALSE		FALSE	TRUE	TN			FALSE	FALSE	TRUE	TN		FALSE	TRUE	TN			FALSE	TRUE	TN		FALSE	TRUE	TN
288	GCF_000940995.1_ASM94099v1_genomic_NZ_CP005973.1.region003.gbk	GCF_000940995.1	Photobacterium gaetbulicola Gung47	negative	C	88		FALSE	FALSE	FALSE	FALSE		FALSE	TRUE	TN			FALSE	FALSE	TRUE	TN		FALSE	TRUE	TN			FALSE	TRUE	TN		FALSE	TRUE	TN
289	GCF_000950575.1_ASM95057v1_genomic_NZ_CP011005.1.region002.gbk	GCF_000950575.1	Psychromicrobium lacuslunae	positive	C	89		TRUE	TRUE	TRUE	FALSE		TRUE	TRUE	TP			TRUE	TRUE	TRUE	TP		TRUE	TRUE	TP			TRUE	TRUE	TP		FALSE	FALSE	FN
290	GCF_000950575.1_ASM95057v1_genomic_NZ_CP011005.1.region007.gbk	GCF_000950575.1	Psychromicrobium lacuslunae	positive	C	90		FALSE	FALSE	FALSE	FALSE		FALSE	TRUE	TN			FALSE	FALSE	TRUE	TN		FALSE	TRUE	TN			FALSE	TRUE	TN		FALSE	TRUE	TN
291	GCF_000953655.1_LHA_genomic_NZ_LN681225.1.region001.gbk	GCF_000953655.1	Legionella hackeliae	negative	C	91		FALSE	FALSE	FALSE	FALSE		FALSE	TRUE	TN			FALSE	FALSE	TRUE	TN		FALSE	TRUE	TN			FALSE	TRUE	TN		FALSE	TRUE	TN
292	GCF_000953655.1_LHA_genomic_NZ_LN681225.1.region003.gbk	GCF_000953655.1	Legionella hackeliae	negative	C	92		FALSE	FALSE	FALSE	FALSE		FALSE	TRUE	TN			FALSE	FALSE	TRUE	TN		FALSE	TRUE	TN			FALSE	TRUE	TN		FALSE	TRUE	TN
293	GCF_000953655.1_LHA_genomic_NZ_LN681225.1.region004.gbk	GCF_000953655.1	Legionella hackeliae	negative	C	93		FALSE	FALSE	FALSE	FALSE		FALSE	TRUE	TN			FALSE	FALSE	TRUE	TN		FALSE	TRUE	TN			FALSE	TRUE	TN		FALSE	TRUE	TN
294	GCF_000953655.1_LHA_genomic_NZ_LN681225.1.region005.gbk	GCF_000953655.1	Legionella hackeliae	negative	C	94		FALSE	FALSE	FALSE	FALSE		FALSE	TRUE	TN			FALSE	FALSE	TRUE	TN		FALSE	TRUE	TN			FALSE	TRUE	TN		FALSE	TRUE	TN
295	GCF_000953655.1_LHA_genomic_NZ_LN681225.1.region009.gbk	GCF_000953655.1	Legionella hackeliae	negative	C	95		FALSE	FALSE	FALSE	FALSE		FALSE	TRUE	TN			FALSE	FALSE	TRUE	TN		FALSE	TRUE	TN			FALSE	TRUE	TN		FALSE	TRUE	TN
296	GCF_000968535.2_ASM96853v1_genomic_NC_016112.1.region005.gbk	GCF_000968535.2	Methylotuvimicrobium alcaliphilum 20Z	negative	C	96		FALSE	FALSE	FALSE	FALSE	fragment? has tonB and pepsy, transposase in middle of NRPS	FALSE	TRUE	TN			FALSE	FALSE	TRUE	TN		FALSE	TRUE	TN			FALSE	TRUE	TN		TRUE	FALSE	FP
297	GCF_000972785.3_ASM97278v3_genomic_NZ_CP011253.3.region007.gbk	GCF_000972785.3	Pandoraea oxalativorans	negative	C	97		TRUE	TRUE	TRUE	TRUE		TRUE	TRUE	TP			TRUE	TRUE	TRUE	TP		TRUE	TRUE	TP			TRUE	TRUE	TP		TRUE	TRUE	TP
298	GCF_001006005.1_ASM100600v1_genomic_NZ_CP011254.1.region002.gbk	GCF_001006005.1	Serratia fonticola	negative	C	98		FALSE	FALSE	FALSE	FALSE		FALSE	TRUE	TN			FALSE	FALSE	TRUE	TN		FALSE	TRUE	TN			FALSE	TRUE	TN		FALSE	TRUE	TN
299	GCF_001006005.1_ASM100600v1_genomic_NZ_CP011254.1.region005.gbk	GCF_001006005.1	Serratia fonticola	negative	C	99		TRUE	TRUE	TRUE	FALSE		TRUE	TRUE	TP			TRUE	TRUE	TRUE	TP		TRUE	TRUE	TP			TRUE	TRUE	TP		TRUE	TRUE	TP
300	GCF_001006005.1_ASM100600v1_genomic_NZ_CP011254.1.region008.gbk	GCF_001006005.1	Serratia fonticola	negative	C	100		TRUE	TRUE	TRUE	TRUE		TRUE	TRUE	TP			TRUE	TRUE	TRUE	TP		TRUE	TRUE	TP			TRUE	TRUE	TP		TRUE	TRUE	TP
301	GCF_001007935.1_ASM100793v1_genomic_NZ_CP011451.1.region004.gbk	GCF_001007935.1	Nitrosomonas communis	negative	D	1		FALSE	FALSE	FALSE	FALSE		TRUE	FALSE	FP	TRUE POSITIVE	I missed it	TRUE	TRUE	TRUE	TP		FALSE	FALSE	FN			TRUE	TRUE	TP		TRUE	TRUE	TP
302	GCF_001010285.1_ASM101028v1_genomic_NZ_CP011104.1.region001.gbk	GCF_001010285.1	Photorhabdus thracensis	negative	D	2		FALSE	FALSE	FALSE	FALSE		FALSE	TRUE	TN			FALSE	FALSE	TRUE	TN		FALSE	TRUE	TN			FALSE	TRUE	TN		FALSE	TRUE	TN
303	GCF_001010285.1_ASM101028v1_genomic_NZ_CP011104.1.region002.gbk	GCF_001010285.1	Photorhabdus thracensis	negative	D	3		FALSE	FALSE	FALSE	FALSE		FALSE	TRUE	TN			FALSE	FALSE	TRUE	TN		FALSE	TRUE	TN			FALSE	TRUE	TN		FALSE	TRUE	TN
304	GCF_001010285.1_ASM101028v1_genomic_NZ_CP011104.1.region006.gbk	GCF_001010285.1	Photorhabdus thracensis	negative	D	4		FALSE	FALSE	FALSE	FALSE		TRUE	FALSE	FP	TRUE POSITIVE	genuine fragment i missed	TRUE	TRUE	TRUE	TP		FALSE	FALSE	FN			TRUE	TRUE	TP		FALSE	FALSE	FN
305	GCF_001010285.1_ASM101028v1_genomic_NZ_CP011104.1.region007.gbk	GCF_001010285.1	Photorhabdus thracensis	negative	D	5		FALSE	FALSE	FALSE	FALSE		FALSE	TRUE	TN			FALSE	FALSE	TRUE	TN		FALSE	TRUE	TN			FALSE	TRUE	TN		FALSE	TRUE	TN
306	GCF_001010285.1_ASM101028v1_genomic_NZ_CP011104.1.region008.gbk	GCF_001010285.1	Photorhabdus thracensis	negative	D	6		TRUE	FALSE	TRUE	FALSE		FALSE	FALSE	FN	genes missing	sal genes missing	TRUE	FALSE	FALSE	FN		FALSE	FALSE	FN			FALSE	FALSE	FN		TRUE	TRUE	TP
307	GCF_001010285.1_ASM101028v1_genomic_NZ_CP011104.1.region010.gbk	GCF_001010285.1	Photorhabdus thracensis	negative	D	7		FALSE	FALSE	FALSE	FALSE		FALSE	TRUE	TN			FALSE	FALSE	TRUE	TN		FALSE	TRUE	TN			FALSE	TRUE	TN		FALSE	TRUE	TN
308	GCF_001010285.1_ASM101028v1_genomic_NZ_CP011104.1.region013.gbk	GCF_001010285.1	Photorhabdus thracensis	negative	D	8		FALSE	FALSE	FALSE	FALSE		FALSE	TRUE	TN			FALSE	FALSE	TRUE	TN		FALSE	TRUE	TN			FALSE	TRUE	TN		FALSE	TRUE	TN
309	GCF_001010285.1_ASM101028v1_genomic_NZ_CP011104.1.region021.gbk	GCF_001010285.1	Photorhabdus thracensis	negative	D	9		FALSE	FALSE	FALSE	FALSE		FALSE	TRUE	TN			FALSE	FALSE	TRUE	TN		FALSE	TRUE	TN			FALSE	TRUE	TN		TRUE	FALSE	FP
310	GCF_001010285.1_ASM101028v1_genomic_NZ_CP011104.1.region023.gbk	GCF_001010285.1	Photorhabdus thracensis	negative	D	10		FALSE	FALSE	FALSE	FALSE		FALSE	TRUE	TN			FALSE	FALSE	TRUE	TN		FALSE	TRUE	TN			FALSE	TRUE	TN		FALSE	TRUE	TN
311	GCF_001010285.1_ASM101028v1_genomic_NZ_CP011104.1.region024.gbk	GCF_001010285.1	Photorhabdus thracensis	negative	D	11		FALSE	FALSE	FALSE	FALSE		FALSE	TRUE	TN			FALSE	FALSE	TRUE	TN		FALSE	TRUE	TN			FALSE	TRUE	TN		FALSE	TRUE	TN
312	GCF_001017435.1_ASM101743v1_genomic_NZ_CP011371.1.region005.gbk	GCF_001017435.1	Schlegelella brevitalea	#N/A	D	12		FALSE	FALSE	FALSE	FALSE		FALSE	TRUE	TN			FALSE	FALSE	TRUE	TN		FALSE	TRUE	TN			FALSE	TRUE	TN		FALSE	TRUE	TN
313	GCF_001017435.1_ASM101743v1_genomic_NZ_CP011371.1.region006.gbk	GCF_001017435.1	Schlegelella brevitalea	#N/A	D	13		FALSE	FALSE	FALSE	FALSE		FALSE	TRUE	TN			FALSE	FALSE	TRUE	TN		FALSE	TRUE	TN			FALSE	TRUE	TN		FALSE	TRUE	TN
314	GCF_001017435.1_ASM101743v1_genomic_NZ_CP011371.1.region007.gbk	GCF_001017435.1	Schlegelella brevitalea	#N/A	D	14		TRUE	TRUE	TRUE	FALSE		TRUE	TRUE	TP			TRUE	TRUE	TRUE	TP		FALSE	FALSE	FN			TRUE	TRUE	TP		TRUE	TRUE	TP
315	GCF_001017435.1_ASM101743v1_genomic_NZ_CP011371.1.region010.gbk	GCF_001017435.1	Schlegelella brevitalea	#N/A	D	15		FALSE	FALSE	FALSE	FALSE		FALSE	TRUE	TN			FALSE	FALSE	TRUE	TN		FALSE	TRUE	TN			FALSE	TRUE	TN		TRUE	FALSE	FP
316	GCF_001017435.1_ASM101743v1_genomic_NZ_CP011371.1.region011.gbk	GCF_001017435.1	Schlegelella brevitalea	#N/A	D	16		FALSE	FALSE	FALSE	FALSE		FALSE	TRUE	TN			FALSE	FALSE	TRUE	TN		FALSE	TRUE	TN			FALSE	TRUE	TN		FALSE	TRUE	TN
317	GCF_001017435.1_ASM101743v1_genomic_NZ_CP011371.1.region014.gbk	GCF_001017435.1	Schlegelella brevitalea	#N/A	D	17		FALSE	FALSE	FALSE	FALSE		FALSE	TRUE	TN			FALSE	FALSE	TRUE	TN		FALSE	TRUE	TN			FALSE	TRUE	TN		FALSE	TRUE	TN
318	GCF_001017655.1_ASM101765v1_genomic_NZ_CP010904.1.region001.gbk	GCF_001017655.1	Kiritimatiella glycovorans	negative	D	18		FALSE	FALSE	FALSE	FALSE		FALSE	TRUE	TN			FALSE	FALSE	TRUE	TN		FALSE	TRUE	TN			FALSE	TRUE	TN		FALSE	TRUE	TN
319	GCF_001027285.1_ASM102728v1_genomic_NZ_CP011509.1.region005.gbk	GCF_001027285.1	Archangium gephyra	negative	D	19		FALSE	FALSE	FALSE	FALSE		FALSE	TRUE	TN			FALSE	FALSE	TRUE	TN		FALSE	TRUE	TN			FALSE	TRUE	TN		FALSE	TRUE	TN
320	GCF_001027285.1_ASM102728v1_genomic_NZ_CP011509.1.region009.gbk	GCF_001027285.1	Archangium gephyra	negative	D	20		FALSE	FALSE	FALSE	FALSE		FALSE	TRUE	TN			FALSE	FALSE	TRUE	TN		FALSE	TRUE	TN			FALSE	TRUE	TN		FALSE	TRUE	TN
321	GCF_001027285.1_ASM102728v1_genomic_NZ_CP011509.1.region013.gbk	GCF_001027285.1	Archangium gephyra	negative	D	21		FALSE	FALSE	FALSE	FALSE		FALSE	TRUE	TN			FALSE	FALSE	TRUE	TN		FALSE	TRUE	TN			FALSE	TRUE	TN		FALSE	TRUE	TN
322	GCF_001027285.1_ASM102728v1_genomic_NZ_CP011509.1.region018.gbk	GCF_001027285.1	Archangium gephyra	negative	D	22		FALSE	FALSE	FALSE	FALSE		FALSE	TRUE	TN			FALSE	FALSE	TRUE	TN		FALSE	TRUE	TN			FALSE	TRUE	TN		FALSE	TRUE	TN
323	GCF_001027285.1_ASM102728v1_genomic_NZ_CP011509.1.region020.gbk	GCF_001027285.1	Archangium gephyra	negative	D	23		TRUE	TRUE	TRUE	FALSE		TRUE	TRUE	TP			TRUE	TRUE	TRUE	TP		FALSE	FALSE	FN			TRUE	TRUE	TP		TRUE	TRUE	TP
324	GCF_001027285.1_ASM102728v1_genomic_NZ_CP011509.1.region023.gbk	GCF_001027285.1	Archangium gephyra	negative	D	24		FALSE	FALSE	FALSE	FALSE		FALSE	TRUE	TN			FALSE	FALSE	TRUE	TN		FALSE	TRUE	TN			FALSE	TRUE	TN		FALSE	TRUE	TN
325	GCF_001027285.1_ASM102728v1_genomic_NZ_CP011509.1.region025.gbk	GCF_001027285.1	Archangium gephyra	negative	D	25		FALSE	FALSE	FALSE	FALSE		FALSE	TRUE	TN			FALSE	FALSE	TRUE	TN		FALSE	TRUE	TN			FALSE	TRUE	TN		FALSE	TRUE	TN
326	GCF_001027285.1_ASM102728v1_genomic_NZ_CP011509.1.region026.gbk	GCF_001027285.1	Archangium gephyra	negative	D	26		FALSE	FALSE	FALSE	FALSE		FALSE	TRUE	TN			FALSE	FALSE	TRUE	TN		FALSE	TRUE	TN			FALSE	TRUE	TN		FALSE	TRUE	TN
327	GCF_001027285.1_ASM102728v1_genomic_NZ_CP011509.1.region028.gbk	GCF_001027285.1	Archangium gephyra	negative	D	27		FALSE	FALSE	FALSE	FALSE		FALSE	TRUE	TN			FALSE	FALSE	TRUE	TN		FALSE	TRUE	TN			FALSE	TRUE	TN		FALSE	TRUE	TN
328	GCF_001027285.1_ASM102728v1_genomic_NZ_CP011509.1.region036.gbk	GCF_001027285.1	Archangium gephyra	negative	D	28		FALSE	FALSE	FALSE	FALSE		FALSE	TRUE	TN			FALSE	FALSE	TRUE	TN		FALSE	TRUE	TN			FALSE	TRUE	TN		FALSE	TRUE	TN
329	GCF_001027285.1_ASM102728v1_genomic_NZ_CP011509.1.region037.gbk	GCF_001027285.1	Archangium gephyra	negative	D	29		FALSE	FALSE	FALSE	FALSE		FALSE	TRUE	TN			FALSE	FALSE	TRUE	TN		FALSE	TRUE	TN			FALSE	TRUE	TN		FALSE	TRUE	TN
330	GCF_001050135.1_ASM105013v1_genomic_NZ_CP012040.1.region005.gbk	GCF_001050135.1	Cyclobacterium amurskyense	negative	D	30		FALSE	FALSE	FALSE	FALSE		FALSE	TRUE	TN			FALSE	FALSE	TRUE	TN		FALSE	TRUE	TN			FALSE	TRUE	TN		TRUE	FALSE	FP
331	GCF_001189295.1_ASM118929v1_genomic_NZ_CP012159.1.region001.gbk	GCF_001189295.1	Chondromyces crocatus	negative	D	31		FALSE	FALSE	FALSE	FALSE		FALSE	TRUE	TN			FALSE	FALSE	TRUE	TN		FALSE	TRUE	TN			FALSE	TRUE	TN		FALSE	TRUE	TN
332	GCF_001189295.1_ASM118929v1_genomic_NZ_CP012159.1.region004.gbk	GCF_001189295.1	Chondromyces crocatus	negative	D	32		FALSE	FALSE	FALSE	FALSE		FALSE	TRUE	TN			FALSE	FALSE	TRUE	TN		FALSE	TRUE	TN			FALSE	TRUE	TN		FALSE	TRUE	TN
333	GCF_001189295.1_ASM118929v1_genomic_NZ_CP012159.1.region007.gbk	GCF_001189295.1	Chondromyces crocatus	negative	D	33		FALSE	FALSE	FALSE	FALSE		FALSE	TRUE	TN			FALSE	FALSE	TRUE	TN		FALSE	TRUE	TN			FALSE	TRUE	TN		FALSE	TRUE	TN
334	GCF_001189295.1_ASM118929v1_genomic_NZ_CP012159.1.region013.gbk	GCF_001189295.1	Chondromyces crocatus	negative	D	34		FALSE	FALSE	FALSE	FALSE		FALSE	TRUE	TN			FALSE	FALSE	TRUE	TN		FALSE	TRUE	TN			FALSE	TRUE	TN		FALSE	TRUE	TN
335	GCF_001189295.1_ASM118929v1_genomic_NZ_CP012159.1.region015.gbk	GCF_001189295.1	Chondromyces crocatus	negative	D	35		FALSE	FALSE	FALSE	FALSE		FALSE	TRUE	TN			FALSE	FALSE	TRUE	TN		FALSE	TRUE	TN			FALSE	TRUE	TN		FALSE	TRUE	TN
336	GCF_001189295.1_ASM118929v1_genomic_NZ_CP012159.1.region017.gbk	GCF_001189295.1	Chondromyces crocatus	negative	D	36		FALSE	FALSE	FALSE	FALSE		FALSE	TRUE	TN			FALSE	FALSE	TRUE	TN		FALSE	TRUE	TN			FALSE	TRUE	TN		FALSE	TRUE	TN
337	GCF_001189295.1_ASM118929v1_genomic_NZ_CP012159.1.region019.gbk	GCF_001189295.1	Chondromyces crocatus	negative	D	37		FALSE	FALSE	FALSE	FALSE		FALSE	TRUE	TN			FALSE	FALSE	TRUE	TN		FALSE	TRUE	TN			FALSE	TRUE	TN		FALSE	TRUE	TN
338	GCF_001189295.1_ASM118929v1_genomic_NZ_CP012159.1.region023.gbk	GCF_001189295.1	Chondromyces crocatus	negative	D	38		FALSE	FALSE	FALSE	FALSE		FALSE	TRUE	TN			FALSE	FALSE	TRUE	TN		FALSE	TRUE	TN			FALSE	TRUE	TN		FALSE	TRUE	TN
339	GCF_001189295.1_ASM118929v1_genomic_NZ_CP012159.1.region024.gbk	GCF_001189295.1	Chondromyces crocatus	negative	D	39		FALSE	FALSE	FALSE	FALSE		FALSE	TRUE	TN			FALSE	FALSE	TRUE	TN		FALSE	TRUE	TN			FALSE	TRUE	TN		FALSE	TRUE	TN
340	GCF_001189295.1_ASM118929v1_genomic_NZ_CP012159.1.region025.gbk	GCF_001189295.1	Chondromyces crocatus	negative	D	40		FALSE	FALSE	FALSE	FALSE		FALSE	TRUE	TN			FALSE	FALSE	TRUE	TN		FALSE	TRUE	TN			FALSE	TRUE	TN		TRUE	FALSE	FP
341	GCF_001189295.1_ASM118929v1_genomic_NZ_CP012159.1.region028.gbk	GCF_001189295.1	Chondromyces crocatus	negative	D	41		FALSE	FALSE	FALSE	FALSE		FALSE	TRUE	TN			FALSE	FALSE	TRUE	TN		FALSE	TRUE	TN			FALSE	TRUE	TN		FALSE	TRUE	TN
342	GCF_001189295.1_ASM118929v1_genomic_NZ_CP012159.1.region031.gbk	GCF_001189295.1	Chondromyces crocatus	negative	D	42		FALSE	FALSE	FALSE	FALSE		FALSE	TRUE	TN			FALSE	FALSE	TRUE	TN		FALSE	TRUE	TN			FALSE	TRUE	TN		FALSE	TRUE	TN
343	GCF_001263205.1_ASM126320v1_genomic_NZ_CP012333.1.region001.gbk	GCF_001263205.1	Labilithrix luteola	#N/A	D	43		FALSE	FALSE	FALSE	FALSE		FALSE	TRUE	TN			FALSE	FALSE	TRUE	TN		FALSE	TRUE	TN			FALSE	TRUE	TN		FALSE	TRUE	TN
344	GCF_001263205.1_ASM126320v1_genomic_NZ_CP012333.1.region006.gbk	GCF_001263205.1	Labilithrix luteola	#N/A	D	44		FALSE	FALSE	FALSE	FALSE		FALSE	TRUE	TN			FALSE	FALSE	TRUE	TN		FALSE	TRUE	TN			FALSE	TRUE	TN		FALSE	TRUE	TN
345	GCF_001277255.1_ASM127725v1_genomic_NZ_CP012264.1.region002.gbk	GCF_001277255.1	Cronobacter condimenti 1330	negative	D	45		TRUE	FALSE	TRUE	TRUE		FALSE	FALSE	FN	genes elsewhere	catechol genes elsewhere	TRUE	FALSE	FALSE	FN		FALSE	FALSE	FN			FALSE	FALSE	FN		TRUE	TRUE	TP
346	GCF_001293125.1_ASM129312v1_genomic_NZ_CP009312.1.region001.gbk	GCF_001293125.1	Lawsonella clevelandensis	positive	D	46		FALSE	FALSE	FALSE	FALSE		FALSE	TRUE	TN			FALSE	FALSE	TRUE	TN		FALSE	TRUE	TN			FALSE	TRUE	TN		FALSE	TRUE	TN
347	GCF_001302585.1_ASM130258v1_genomic_NZ_CP012752.1.region005.gbk	GCF_001302585.1	Kibdelosporangium phytohabitans	positive	D	47		FALSE	FALSE	FALSE	FALSE		FALSE	TRUE	TN			FALSE	FALSE	TRUE	TN		FALSE	TRUE	TN			FALSE	TRUE	TN		FALSE	TRUE	TN
348	GCF_001302585.1_ASM130258v1_genomic_NZ_CP012752.1.region009.gbk	GCF_001302585.1	Kibdelosporangium phytohabitans	positive	D	48		FALSE	FALSE	FALSE	FALSE		FALSE	TRUE	TN			FALSE	FALSE	TRUE	TN		FALSE	TRUE	TN			FALSE	TRUE	TN		FALSE	TRUE	TN
349	GCF_001302585.1_ASM130258v1_genomic_NZ_CP012752.1.region014.gbk	GCF_001302585.1	Kibdelosporangium phytohabitans	positive	D	49		FALSE	FALSE	FALSE	FALSE		FALSE	TRUE	TN			FALSE	FALSE	TRUE	TN		FALSE	TRUE	TN			FALSE	TRUE	TN		FALSE	TRUE	TN
350	GCF_001302585.1_ASM130258v1_genomic_NZ_CP012752.1.region015.gbk	GCF_001302585.1	Kibdelosporangium phytohabitans	positive	D	50		FALSE	FALSE	FALSE	FALSE		FALSE	TRUE	TN			FALSE	FALSE	TRUE	TN		FALSE	TRUE	TN			FALSE	TRUE	TN		FALSE	TRUE	TN
351	GCF_001302585.1_ASM130258v1_genomic_NZ_CP012752.1.region018.gbk	GCF_001302585.1	Kibdelosporangium phytohabitans	positive	D	51		TRUE	TRUE	TRUE	TRUE		TRUE	TRUE	TP			TRUE	TRUE	TRUE	TP		TRUE	TRUE	TP			TRUE	TRUE	TP		FALSE	FALSE	FN
352	GCF_001302585.1_ASM130258v1_genomic_NZ_CP012752.1.region025.gbk	GCF_001302585.1	Kibdelosporangium phytohabitans	positive	D	52		FALSE	FALSE	FALSE	FALSE		FALSE	TRUE	TN			FALSE	FALSE	TRUE	TN		FALSE	TRUE	TN			FALSE	TRUE	TN		FALSE	TRUE	TN
353	GCF_001302585.1_ASM130258v1_genomic_NZ_CP012752.1.region039.gbk	GCF_001302585.1	Kibdelosporangium phytohabitans	positive	D	53		FALSE	FALSE	FALSE	FALSE		FALSE	TRUE	TN			FALSE	FALSE	TRUE	TN		FALSE	TRUE	TN			FALSE	TRUE	TN		FALSE	TRUE	TN
354	GCF_001302585.1_ASM130258v1_genomic_NZ_CP012752.1.region045.gbk	GCF_001302585.1	Kibdelosporangium phytohabitans	positive	D	54		FALSE	FALSE	FALSE	FALSE		FALSE	TRUE	TN			FALSE	FALSE	TRUE	TN		FALSE	TRUE	TN			FALSE	TRUE	TN		FALSE	TRUE	TN
355	GCF_001305595.1_ASM130559v1_genomic_NZ_CP012403.1.region003.gbk	GCF_001305595.1	Azospirillum thiophilum	negative	D	55		TRUE	TRUE	TRUE	TRUE		TRUE	TRUE	TP			TRUE	TRUE	TRUE	TP		TRUE	TRUE	TP			TRUE	TRUE	TP		TRUE	TRUE	TP
356	GCF_001402875.1_ASM140287v1_genomic_NZ_CP012946.1.region005.gbk	GCF_001402875.1	Blastochloris viridis	negative	D	56		FALSE	FALSE	FALSE	FALSE		FALSE	TRUE	TN			FALSE	FALSE	TRUE	TN		FALSE	TRUE	TN			FALSE	TRUE	TN		FALSE	TRUE	TN
357	GCF_001402875.1_ASM140287v1_genomic_NZ_CP012946.1.region006.gbk	GCF_001402875.1	Blastochloris viridis	negative	D	57		TRUE	TRUE	TRUE	FALSE		TRUE	TRUE	TP			TRUE	TRUE	TRUE	TP		TRUE	TRUE	TP			TRUE	TRUE	TP		TRUE	TRUE	TP
358	GCF_001442805.1_ASM144280v1_genomic_NZ_CP011131.1.region003.gbk	GCF_001442805.1	Lysobacter gummosus	negative	D	58		FALSE	FALSE	FALSE	FALSE		FALSE	TRUE	TN			FALSE	FALSE	TRUE	TN		FALSE	TRUE	TN			FALSE	TRUE	TN		FALSE	TRUE	TN
359	GCF_001442805.1_ASM144280v1_genomic_NZ_CP011131.1.region005.gbk	GCF_001442805.1	Lysobacter gummosus	negative	D	59		FALSE	FALSE	FALSE	FALSE		FALSE	TRUE	TN			FALSE	FALSE	TRUE	TN		FALSE	TRUE	TN			FALSE	TRUE	TN		TRUE	FALSE	FP
360	GCF_001442805.1_ASM144280v1_genomic_NZ_CP011131.1.region007.gbk	GCF_001442805.1	Lysobacter gummosus	negative	D	60		FALSE	FALSE	FALSE	FALSE		FALSE	TRUE	TN			FALSE	FALSE	TRUE	TN		FALSE	TRUE	TN			FALSE	TRUE	TN		FALSE	TRUE	TN
361	GCF_001442805.1_ASM144280v1_genomic_NZ_CP011131.1.region009.gbk	GCF_001442805.1	Lysobacter gummosus	negative	D	61		FALSE	FALSE	FALSE	FALSE		FALSE	TRUE	TN			FALSE	FALSE	TRUE	TN		FALSE	TRUE	TN			FALSE	TRUE	TN		TRUE	FALSE	FP
362	GCF_001442805.1_ASM144280v1_genomic_NZ_CP011131.1.region013.gbk	GCF_001442805.1	Lysobacter gummosus	negative	D	62		FALSE	FALSE	FALSE	FALSE		FALSE	TRUE	TN			FALSE	FALSE	TRUE	TN		FALSE	TRUE	TN			FALSE	TRUE	TN		TRUE	FALSE	FP
363	GCF_001444405.1_ASM144440v1_genomic_NZ_CP013187.1.region003.gbk	GCF_001444405.1	Pseudoalteromonas phenolica	negative	D	63		TRUE	TRUE	TRUE	TRUE		TRUE	TRUE	TP			TRUE	TRUE	TRUE	TP		FALSE	FALSE	FN			TRUE	TRUE	TP		TRUE	TRUE	TP
364	GCF_001444405.1_ASM144440v1_genomic_NZ_CP013188.1.region001.gbk	GCF_001444405.1	Pseudoalteromonas phenolica	negative	D	64		FALSE	FALSE	FALSE	FALSE		FALSE	TRUE	TN			FALSE	FALSE	TRUE	TN		FALSE	TRUE	TN			FALSE	TRUE	TN		TRUE	FALSE	FP
365	GCF_001547995.1_ASM154799v1_genomic_NZ_AP014690.1.region001.gbk	GCF_001547995.1	Asaia bogorensis NBRC 16594	negative	D	65		FALSE	FALSE	FALSE	FALSE		FALSE	TRUE	TN			FALSE	FALSE	TRUE	TN		FALSE	TRUE	TN			FALSE	TRUE	TN		TRUE	FALSE	FP
366	GCF_001553605.1_ASM155360v1_genomic_NZ_CP014229.1.region002.gbk	GCF_001553605.1	Desulfovibrio fairfieldensis	negative	D	66		FALSE	FALSE	FALSE	FALSE	has transporters otherwise no	FALSE	TRUE	TN			FALSE	FALSE	TRUE	TN		FALSE	TRUE	TN			FALSE	TRUE	TN		TRUE	FALSE	FP
367	GCF_001553625.1_ASM155362v1_genomic_NZ_CP014230.1.region001.gbk	GCF_001553625.1	Desulfomicrobium orale DSM 12838	negative	D	67		TRUE	FALSE	TRUE	FALSE		FALSE	FALSE	FN	genes elsewhere	salicylate genes elsewhere	TRUE	FALSE	FALSE	FN		FALSE	FALSE	FN			FALSE	FALSE	FN		FALSE	FALSE	FN
368	GCF_001584145.1_ASM158414v1_genomic_NZ_CP013232.1.region001.gbk	GCF_001584145.1	Collimonas fungivorans	negative	D	68		FALSE	FALSE	FALSE	FALSE		FALSE	TRUE	TN			FALSE	FALSE	TRUE	TN		FALSE	TRUE	TN			FALSE	TRUE	TN		FALSE	TRUE	TN
369	GCF_001584145.1_ASM158414v1_genomic_NZ_CP013232.1.region002.gbk	GCF_001584145.1	Collimonas fungivorans	negative	D	69		FALSE	FALSE	FALSE	FALSE		FALSE	TRUE	TN			FALSE	FALSE	TRUE	TN		FALSE	TRUE	TN			FALSE	TRUE	TN		FALSE	TRUE	TN
370	GCF_001584145.1_ASM158414v1_genomic_NZ_CP013232.1.region007.gbk	GCF_001584145.1	Collimonas fungivorans	negative	D	70		FALSE	FALSE	FALSE	FALSE	abc and tauD, prob no	FALSE	TRUE	TN			FALSE	FALSE	TRUE	TN		FALSE	TRUE	TN			FALSE	TRUE	TN		FALSE	TRUE	TN
371	GCF_001584145.1_ASM158414v1_genomic_NZ_CP013232.1.region008.gbk	GCF_001584145.1	Collimonas fungivorans	negative	D	71		TRUE	TRUE	TRUE	TRUE		TRUE	TRUE	TP			TRUE	TRUE	TRUE	TP		TRUE	TRUE	TP			TRUE	TRUE	TP		TRUE	TRUE	TP
372	GCF_001611975.1_ASM161197v1_genomic_NZ_CP014527.1.region001.gbk	GCF_001611975.1	Haematospirillum jordaniae	negative	D	72		TRUE	FALSE	TRUE	FALSE	Has alkylsalicylate PKS	FALSE	FALSE	FN	5-alkylsalicylate	5-methylsalicylate	TRUE	FALSE	FALSE	FN		TRUE	TRUE	TP			TRUE	TRUE	TP		TRUE	TRUE	TP
373	GCF_001643775.1_ASM164377v1_genomic_NZ_CP011402.1.region001.gbk	GCF_001643775.1	Denitrobacterium detoxificans	negative	D	73		TRUE	FALSE	TRUE	FALSE		FALSE	FALSE	FN	genes missing	no salicylate genes - possible fragment	TRUE	FALSE	FALSE	FN		FALSE	FALSE	FN			FALSE	FALSE	FN		FALSE	FALSE	FN
374	GCF_001643775.1_ASM164377v1_genomic_NZ_CP011402.1.region002.gbk	GCF_001643775.1	Denitrobacterium detoxificans	negative	D	74		FALSE	FALSE	FALSE	FALSE		FALSE	TRUE	TN			FALSE	FALSE	TRUE	TN		FALSE	TRUE	TN			FALSE	TRUE	TN		FALSE	TRUE	TN
375	GCF_001654455.1_ASM165445v1_genomic_NZ_CP015772.1.region002.gbk	GCF_001654455.1	Niabella ginsenosidivorans	negative	D	75		FALSE	FALSE	FALSE	FALSE		FALSE	TRUE	TN			FALSE	FALSE	TRUE	TN		FALSE	TRUE	TN			FALSE	TRUE	TN		FALSE	TRUE	TN
376	GCF_001658025.2_ASM165802v2_genomic_NZ_CP014007.2.region003.gbk	GCF_001658025.2	Kosakonia oryzae	negative	D	76		TRUE	TRUE	TRUE	TRUE		TRUE	TRUE	TP			TRUE	TRUE	TRUE	TP		TRUE	TRUE	TP			TRUE	TRUE	TP		TRUE	TRUE	TP
377	GCF_001659785.1_ASM165978v1_genomic_NZ_CP015961.1.region005.gbk	GCF_001659785.1	Dietzia timorensis	positive	D	77		TRUE	FALSE	FALSE	TRUE		FALSE	FALSE	FN	genes elsewhere	catechol genes elsewhere	TRUE	FALSE	FALSE	FN		FALSE	FALSE	FN			FALSE	FALSE	FN		FALSE	FALSE	FN
378	GCF_001678905.1_ASM167890v1_genomic_NZ_CP012117.1.region001.gbk	GCF_001678905.1	Dermabacter vaginalis	positive	D	78		TRUE	TRUE	TRUE	TRUE		FALSE	FALSE	FN	genes missing	missing monooxygenase, homologs have it	TRUE	FALSE	FALSE	FN		TRUE	TRUE	TP			TRUE	TRUE	TP		FALSE	FALSE	FN
379	GCF_001701025.1_ASM170102v1_genomic_NZ_CP016793.1.region011.gbk	GCF_001701025.1	Lentzea guizhouensis	positive	D	79		FALSE	FALSE	FALSE	FALSE		FALSE	TRUE	TN			FALSE	FALSE	TRUE	TN		FALSE	TRUE	TN			FALSE	TRUE	TN		FALSE	TRUE	TN
380	GCF_001701025.1_ASM170102v1_genomic_NZ_CP016793.1.region020.gbk	GCF_001701025.1	Lentzea guizhouensis	positive	D	80		TRUE	FALSE	TRUE	TRUE		FALSE	FALSE	FN	genes elsewhere	hydroxamate synthesis elsewhere	TRUE	FALSE	FALSE	FN		TRUE	TRUE	TP			TRUE	TRUE	TP		FALSE	FALSE	FN
381	GCF_001701025.1_ASM170102v1_genomic_NZ_CP016793.1.region024.gbk	GCF_001701025.1	Lentzea guizhouensis	positive	D	81		FALSE	FALSE	FALSE	FALSE		FALSE	TRUE	TN			FALSE	FALSE	TRUE	TN		FALSE	TRUE	TN			FALSE	TRUE	TN		FALSE	TRUE	TN
382	GCF_001701025.1_ASM170102v1_genomic_NZ_CP016793.1.region025.gbk	GCF_001701025.1	Lentzea guizhouensis	positive	D	82		FALSE	FALSE	FALSE	FALSE		FALSE	TRUE	TN			FALSE	FALSE	TRUE	TN		FALSE	TRUE	TN			FALSE	TRUE	TN		FALSE	TRUE	TN
383	GCF_001717955.1_ASM171795v1_genomic_NZ_CP014168.1.region005.gbk	GCF_001717955.1	Sphingomonas panacis	negative	D	83		FALSE	FALSE	FALSE	FALSE		FALSE	TRUE	TN			FALSE	FALSE	TRUE	TN		FALSE	TRUE	TN			FALSE	TRUE	TN		FALSE	TRUE	TN
384	GCF_001741865.1_ASM174186v1_genomic_NZ_CP017147.1.region003.gbk	GCF_001741865.1	Bosea vaviloviae	negative	D	84		FALSE	FALSE	FALSE	FALSE		FALSE	TRUE	TN			FALSE	FALSE	TRUE	TN		FALSE	TRUE	TN			FALSE	TRUE	TN		FALSE	TRUE	TN
385	GCF_001747405.1_ASM174740v1_genomic_NZ_CP017305.1.region002.gbk	GCF_001747405.1	Chlorobaculum limnaeum	negative	D	85		FALSE	FALSE	FALSE	FALSE		FALSE	TRUE	TN			FALSE	FALSE	TRUE	TN		FALSE	TRUE	TN			FALSE	TRUE	TN		FALSE	TRUE	TN
386	GCF_001747425.1_ASM174742v1_genomic_NZ_CP014859.1.region002.gbk	GCF_001747425.1	Actinoalloteichus hymeniacidonis	positive	D	86		FALSE	FALSE	FALSE	FALSE		FALSE	TRUE	TN			FALSE	FALSE	TRUE	TN		FALSE	TRUE	TN			FALSE	TRUE	TN		FALSE	TRUE	TN
387	GCF_001747425.1_ASM174742v1_genomic_NZ_CP014859.1.region004.gbk	GCF_001747425.1	Actinoalloteichus hymeniacidonis	positive	D	87		FALSE	FALSE	FALSE	FALSE		FALSE	TRUE	TN			FALSE	FALSE	TRUE	TN		FALSE	TRUE	TN			FALSE	TRUE	TN		FALSE	TRUE	TN
388	GCF_001747425.1_ASM174742v1_genomic_NZ_CP014859.1.region011.gbk	GCF_001747425.1	Actinoalloteichus hymeniacidonis	positive	D	88		FALSE	FALSE	FALSE	FALSE		FALSE	TRUE	TN			FALSE	FALSE	TRUE	TN		FALSE	TRUE	TN			FALSE	TRUE	TN		FALSE	TRUE	TN
389	GCF_001747425.1_ASM174742v1_genomic_NZ_CP014859.1.region012.gbk	GCF_001747425.1	Actinoalloteichus hymeniacidonis	positive	D	89		TRUE	TRUE	TRUE	FALSE		TRUE	TRUE	TP			TRUE	TRUE	TRUE	TP		FALSE	FALSE	FN			TRUE	TRUE	TP		FALSE	FALSE	FN
390	GCF_001747425.1_ASM174742v1_genomic_NZ_CP014859.1.region013.gbk	GCF_001747425.1	Actinoalloteichus hymeniacidonis	positive	D	90		FALSE	FALSE	FALSE	FALSE		FALSE	TRUE	TN			FALSE	FALSE	TRUE	TN		FALSE	TRUE	TN			FALSE	TRUE	TN		FALSE	TRUE	TN
391	GCF_001747425.1_ASM174742v1_genomic_NZ_CP014859.1.region015.gbk	GCF_001747425.1	Actinoalloteichus hymeniacidonis	positive	D	91		FALSE	FALSE	FALSE	FALSE		FALSE	TRUE	TN			FALSE	FALSE	TRUE	TN		FALSE	TRUE	TN			FALSE	TRUE	TN		FALSE	TRUE	TN
392	GCF_001747425.1_ASM174742v1_genomic_NZ_CP014859.1.region016.gbk	GCF_001747425.1	Actinoalloteichus hymeniacidonis	positive	D	92		FALSE	FALSE	FALSE	FALSE		FALSE	TRUE	TN			FALSE	FALSE	TRUE	TN		FALSE	TRUE	TN			FALSE	TRUE	TN		FALSE	TRUE	TN
393	GCF_001761385.1_ASM176138v1_genomic_NZ_CP017476.1.region004.gbk	GCF_001761385.1	Hydrogenophaga crassostreae	negative	D	93		FALSE	FALSE	FALSE	FALSE		FALSE	TRUE	TN			FALSE	FALSE	TRUE	TN		FALSE	TRUE	TN			FALSE	TRUE	TN		FALSE	TRUE	TN
394	GCF_001877035.1_ASM187703v1_genomic_NZ_CP015756.1.region003.gbk	GCF_001877035.1	Clostridium estertheticum subsp. estertheticum	negative	D	94		FALSE	FALSE	FALSE	FALSE		FALSE	TRUE	TN			FALSE	FALSE	TRUE	TN		FALSE	TRUE	TN			FALSE	TRUE	TN		FALSE	TRUE	TN
395	GCF_001886815.1_ASM188681v1_genomic_NZ_CP018099.1.region001.gbk	GCF_001886815.1	Caldithrix abyssi DSM 13497	negative	D	95		FALSE	FALSE	FALSE	FALSE		FALSE	TRUE	TN			FALSE	FALSE	TRUE	TN		FALSE	TRUE	TN			FALSE	TRUE	TN		FALSE	TRUE	TN
396	GCF_001887595.1_ASM188759v1_genomic_NZ_CP017480.1.region005.gbk	GCF_001887595.1	Luteibacter rhizovicinus DSM 16549	negative	D	96		FALSE	FALSE	FALSE	FALSE		FALSE	TRUE	TN			FALSE	FALSE	TRUE	TN		FALSE	TRUE	TN			FALSE	TRUE	TN		FALSE	TRUE	TN
397	GCF_001888185.1_ASM188818v1_genomic_NZ_CP016368.1.region001.gbk	GCF_001888185.1	Phaeobacter porticola	negative	D	97		FALSE	FALSE	FALSE	FALSE		FALSE	TRUE	TN			FALSE	FALSE	TRUE	TN		FALSE	TRUE	TN			FALSE	TRUE	TN		FALSE	TRUE	TN
398	GCF_001895265.1_ASM189526v1_genomic_NZ_CP016796.1.region001.gbk	GCF_001895265.1	Francisella uliginis	negative	D	98		FALSE	FALSE	FALSE	FALSE		FALSE	TRUE	TN			FALSE	FALSE	TRUE	TN		FALSE	TRUE	TN			FALSE	TRUE	TN		FALSE	TRUE	TN
399	GCF_001895265.1_ASM189526v1_genomic_NZ_CP016796.1.region002.gbk	GCF_001895265.1	Francisella uliginis	negative	D	99		FALSE	FALSE	FALSE	FALSE		FALSE	TRUE	TN			FALSE	FALSE	TRUE	TN		FALSE	TRUE	TN			FALSE	TRUE	TN		FALSE	TRUE	TN
400	GCF_001941945.1_ASM194194v1_genomic_NZ_CP015583.1.region001.gbk	GCF_001941945.1	Roseomonas gilardii	negative	D	100		TRUE	TRUE	FALSE	FALSE		TRUE	TRUE	TP			TRUE	TRUE	TRUE	TP		FALSE	FALSE	FN			TRUE	TRUE	TP		FALSE	FALSE	FN
401	GCF_001955695.1_ASM195569v1_genomic_NZ_CP019236.1.region004.gbk	GCF_001955695.1	Rhodoferax koreense	negative	E	1		FALSE	FALSE	FALSE	FALSE		FALSE	TRUE	TN			FALSE	FALSE	TRUE	TN		FALSE	TRUE	TN			FALSE	TRUE	TN		FALSE	TRUE	TN
402	GCF_001984825.2_ASM198482v2_genomic_NZ_CP043318.1.region001.gbk	GCF_001984825.2	Enterobacter chengduensis	negative	E	2		TRUE	TRUE	TRUE	TRUE		TRUE	TRUE	TP			TRUE	TRUE	TRUE	TP		TRUE	TRUE	TP			TRUE	TRUE	TP		TRUE	TRUE	TP
403	GCF_001999945.1_ASM199994v1_genomic_NZ_CP019650.1.region007.gbk	GCF_001999945.1	Microbulbifer agarilyticus	negative	E	3		FALSE	FALSE	FALSE	FALSE		FALSE	TRUE	TN			FALSE	FALSE	TRUE	TN		FALSE	TRUE	TN			FALSE	TRUE	TN		FALSE	TRUE	TN
404	GCF_002028405.1_ASM202840v1_genomic_NZ_CP020046.1.region001.gbk	GCF_002028405.1	Thiomonas intermedia	negative	E	4		FALSE	FALSE	FALSE	FALSE		FALSE	TRUE	TN			FALSE	FALSE	TRUE	TN		FALSE	TRUE	TN			FALSE	TRUE	TN		FALSE	TRUE	TN
405	GCF_002028405.1_ASM202840v1_genomic_NZ_CP020046.1.region002.gbk	GCF_002028405.1	Thiomonas intermedia	negative	E	5		FALSE	FALSE	FALSE	FALSE		FALSE	TRUE	TN			FALSE	FALSE	TRUE	TN		FALSE	TRUE	TN			FALSE	TRUE	TN		FALSE	TRUE	TN
406	GCF_002028405.1_ASM202840v1_genomic_NZ_CP020046.1.region004.gbk	GCF_002028405.1	Thiomonas intermedia	negative	E	6		FALSE	FALSE	FALSE	FALSE		FALSE	TRUE	TN			FALSE	FALSE	TRUE	TN		FALSE	TRUE	TN			FALSE	TRUE	TN		FALSE	TRUE	TN
407	GCF_002043005.1_ASM204300v1_genomic_NZ_CP020331.1.region001.gbk	GCF_002043005.1	Martelella mediterranea DSM 17316	negative	E	7		FALSE	FALSE	FALSE	FALSE		FALSE	TRUE	TN			FALSE	FALSE	TRUE	TN		FALSE	TRUE	TN			FALSE	TRUE	TN		FALSE	TRUE	TN
408	GCF_002075285.3_ASM207528v3_genomic_NZ_CP021983.2.region001.gbk	GCF_002075285.3	Halomicronema hongdechloris C2206	#N/A	E	8		FALSE	FALSE	FALSE	FALSE		FALSE	TRUE	TN			FALSE	FALSE	TRUE	TN		FALSE	TRUE	TN			FALSE	TRUE	TN		FALSE	TRUE	TN
409	GCF_002075285.3_ASM207528v3_genomic_NZ_CP021983.2.region002.gbk	GCF_002075285.3	Halomicronema hongdechloris C2206	#N/A	E	9		TRUE	FALSE	TRUE	FALSE	Could be, novel? homologs have trans	FALSE	FALSE	FN	novel synth	If siderophore, is novel	TRUE	FALSE	FALSE	FN		TRUE	TRUE	TP			TRUE	TRUE	TP		TRUE	TRUE	TP
410	GCF_002097715.1_ASM209771v1_genomic_NZ_CP020737.1.region001.gbk	GCF_002097715.1	Burkholderia ubonensis subsp. mesacidophila	negative	E	10		TRUE	TRUE	TRUE	FALSE		TRUE	TRUE	TP			TRUE	TRUE	TRUE	TP		TRUE	TRUE	TP			TRUE	TRUE	TP		TRUE	TRUE	TP
411	GCF_002097715.1_ASM209771v1_genomic_NZ_CP020737.1.region002.gbk	GCF_002097715.1	Burkholderia ubonensis subsp. mesacidophila	negative	E	11		TRUE	TRUE	TRUE	TRUE		TRUE	TRUE	TP			TRUE	TRUE	TRUE	TP		TRUE	TRUE	TP			TRUE	TRUE	TP		TRUE	TRUE	TP
412	GCF_002097715.1_ASM209771v1_genomic_NZ_CP020738.1.region002.gbk	GCF_002097715.1	Burkholderia ubonensis subsp. mesacidophila	negative	E	12		FALSE	FALSE	FALSE	FALSE		FALSE	TRUE	TN			FALSE	FALSE	TRUE	TN		FALSE	TRUE	TN			FALSE	TRUE	TN		FALSE	TRUE	TN
413	GCF_002097715.1_ASM209771v1_genomic_NZ_CP020738.1.region003.gbk	GCF_002097715.1	Burkholderia ubonensis subsp. mesacidophila	negative	E	13		FALSE	FALSE	FALSE	FALSE		FALSE	TRUE	TN			FALSE	FALSE	TRUE	TN		FALSE	TRUE	TN			FALSE	TRUE	TN		FALSE	TRUE	TN
414	GCF_002097715.1_ASM209771v1_genomic_NZ_CP020738.1.region005.gbk	GCF_002097715.1	Burkholderia ubonensis subsp. mesacidophila	negative	E	14		FALSE	FALSE	FALSE	FALSE		FALSE	TRUE	TN			FALSE	FALSE	TRUE	TN		FALSE	TRUE	TN			FALSE	TRUE	TN		FALSE	TRUE	TN
415	GCF_002097715.1_ASM209771v1_genomic_NZ_CP020738.1.region006.gbk	GCF_002097715.1	Burkholderia ubonensis subsp. mesacidophila	negative	E	15		FALSE	FALSE	FALSE	FALSE		FALSE	TRUE	TN			FALSE	FALSE	TRUE	TN		FALSE	TRUE	TN			FALSE	TRUE	TN		FALSE	TRUE	TN
416	GCF_002097715.1_ASM209771v1_genomic_NZ_CP020739.1.region001.gbk	GCF_002097715.1	Burkholderia ubonensis subsp. mesacidophila	negative	E	16		FALSE	FALSE	FALSE	FALSE		FALSE	TRUE	TN			FALSE	FALSE	TRUE	TN		FALSE	TRUE	TN			FALSE	TRUE	TN		TRUE	FALSE	FP
417	GCF_002097715.1_ASM209771v1_genomic_NZ_CP020739.1.region005.gbk	GCF_002097715.1	Burkholderia ubonensis subsp. mesacidophila	negative	E	17		FALSE	FALSE	FALSE	FALSE		FALSE	TRUE	TN			FALSE	FALSE	TRUE	TN		FALSE	TRUE	TN			FALSE	TRUE	TN		FALSE	TRUE	TN
418	GCF_002117005.1_ASM211700v1_genomic_NZ_CP021023.1.region001.gbk	GCF_002117005.1	Sedimentisphaera salicampi	negative	E	18		FALSE	FALSE	FALSE	FALSE		FALSE	TRUE	TN			FALSE	FALSE	TRUE	TN		FALSE	TRUE	TN			FALSE	TRUE	TN		FALSE	TRUE	TN
419	GCF_002117405.1_ASM211740v1_genomic_NZ_CP019949.1.region001.gbk	GCF_002117405.1	Methylocystis bryophila	negative	E	19		FALSE	FALSE	FALSE	FALSE		FALSE	TRUE	TN			FALSE	FALSE	TRUE	TN		FALSE	TRUE	TN			FALSE	TRUE	TN		TRUE	FALSE	FP
420	GCF_002117405.1_ASM211740v1_genomic_NZ_CP019949.1.region002.gbk	GCF_002117405.1	Methylocystis bryophila	negative	E	20		FALSE	FALSE	FALSE	FALSE		FALSE	TRUE	TN			FALSE	FALSE	TRUE	TN		FALSE	TRUE	TN			FALSE	TRUE	TN		FALSE	TRUE	TN
421	GCF_002117445.1_ASM211744v1_genomic_NZ_CP019937.1.region001.gbk	GCF_002117445.1	Ketogulonicigenium robustum	#N/A	E	21		FALSE	FALSE	FALSE	FALSE		FALSE	TRUE	TN			FALSE	FALSE	TRUE	TN		FALSE	TRUE	TN			FALSE	TRUE	TN		FALSE	TRUE	TN
422	GCF_002157205.1_ASM215720v1_genomic_NZ_CP021358.1.region002.gbk	GCF_002157205.1	Kushneria marisflavi	negative	E	22		FALSE	FALSE	FALSE	FALSE		FALSE	TRUE	TN			FALSE	FALSE	TRUE	TN		FALSE	TRUE	TN			FALSE	TRUE	TN		FALSE	TRUE	TN
423	GCF_002157225.2_ASM215722v2_genomic_NZ_CP020038.1.region005.gbk	GCF_002157225.2	Agarilytica rhodophyticola	negative	E	23		FALSE	FALSE	FALSE	FALSE		FALSE	TRUE	TN			FALSE	FALSE	TRUE	TN		FALSE	TRUE	TN			FALSE	TRUE	TN		TRUE	FALSE	FP
424	GCF_002157225.2_ASM215722v2_genomic_NZ_CP020038.1.region008.gbk	GCF_002157225.2	Agarilytica rhodophyticola	negative	E	24		TRUE	TRUE	TRUE	TRUE		TRUE	TRUE	TP			TRUE	TRUE	TRUE	TP		FALSE	FALSE	FN			TRUE	TRUE	TP		TRUE	TRUE	TP
425	GCF_002157225.2_ASM215722v2_genomic_NZ_CP020038.1.region012.gbk	GCF_002157225.2	Agarilytica rhodophyticola	negative	E	25		FALSE	FALSE	FALSE	FALSE		FALSE	TRUE	TN			FALSE	FALSE	TRUE	TN		FALSE	TRUE	TN			FALSE	TRUE	TN		TRUE	FALSE	FP
426	GCF_002157875.1_ASM215787v1_genomic_NZ_CP021376.1.region002.gbk	GCF_002157875.1	Oceanisphaera avium	negative	E	26		TRUE	TRUE	TRUE	FALSE		TRUE	TRUE	TP			TRUE	TRUE	TRUE	TP		TRUE	TRUE	TP			TRUE	TRUE	TP		TRUE	TRUE	TP
427	GCF_002158865.1_ASM215886v1_genomic_NZ_CP021455.1.region006.gbk	GCF_002158865.1	Comamonas serinivorans	negative	E	27		TRUE	TRUE	TRUE	FALSE		TRUE	TRUE	TP			TRUE	TRUE	TRUE	TP		TRUE	TRUE	TP			TRUE	TRUE	TP		FALSE	FALSE	FN
428	GCF_002162375.1_ASM216237v1_genomic_NZ_CP021425.1.region010.gbk	GCF_002162375.1	Oleiphilus messinensis	negative	E	28		FALSE	FALSE	FALSE	FALSE		FALSE	TRUE	TN			FALSE	FALSE	TRUE	TN		FALSE	TRUE	TN			FALSE	TRUE	TN		FALSE	TRUE	TN
429	GCF_002162375.1_ASM216237v1_genomic_NZ_CP021425.1.region015.gbk	GCF_002162375.1	Oleiphilus messinensis	negative	E	29		FALSE	FALSE	FALSE	FALSE		FALSE	TRUE	TN			FALSE	FALSE	TRUE	TN		FALSE	TRUE	TN			FALSE	TRUE	TN		FALSE	TRUE	TN
430	GCF_002215215.1_ASM221521v1_genomic_NZ_CP018632.1.region003.gbk	GCF_002215215.1	Granulosicoccus antarcticus IMCC3135	negative	E	30		FALSE	FALSE	FALSE	FALSE		FALSE	TRUE	TN			FALSE	FALSE	TRUE	TN		FALSE	TRUE	TN			FALSE	TRUE	TN		FALSE	TRUE	TN
431	GCF_002222655.1_ASM222265v1_genomic_NZ_CP022423.1.region001.gbk	GCF_002222655.1	Vitreoscilla filiformis	negative	E	31		FALSE	FALSE	FALSE	FALSE		FALSE	TRUE	TN			FALSE	FALSE	TRUE	TN		FALSE	TRUE	TN			FALSE	TRUE	TN		FALSE	TRUE	TN
432	GCF_002234575.2_ASM223457v2_genomic_NZ_CP022464.2.region001.gbk	GCF_002234575.2	Enterocloster bolteae	positive	E	32		FALSE	FALSE	FALSE	FALSE		FALSE	TRUE	TN			FALSE	FALSE	TRUE	TN		FALSE	TRUE	TN			FALSE	TRUE	TN		FALSE	TRUE	TN
433	GCF_002243515.1_ASM224351v1_genomic_NZ_CP022657.1.region002.gbk	GCF_002243515.1	Tumebacillus algifaecis	positive	E	33		FALSE	FALSE	FALSE	FALSE	coincidental transport, also an NIS cluster	FALSE	TRUE	TN			FALSE	FALSE	TRUE	TN		TRUE	FALSE	FP	coincidental transport		TRUE	FALSE	FP		FALSE	TRUE	TN
434	GCF_002243515.1_ASM224351v1_genomic_NZ_CP022657.1.region004.gbk	GCF_002243515.1	Tumebacillus algifaecis	positive	E	34		FALSE	FALSE	FALSE	FALSE		FALSE	TRUE	TN			FALSE	FALSE	TRUE	TN		FALSE	TRUE	TN			FALSE	TRUE	TN		FALSE	TRUE	TN
435	GCF_002243515.1_ASM224351v1_genomic_NZ_CP022657.1.region005.gbk	GCF_002243515.1	Tumebacillus algifaecis	positive	E	35		FALSE	FALSE	FALSE	FALSE		FALSE	TRUE	TN			FALSE	FALSE	TRUE	TN		FALSE	TRUE	TN			FALSE	TRUE	TN		FALSE	TRUE	TN
436	GCF_002243515.1_ASM224351v1_genomic_NZ_CP022657.1.region007.gbk	GCF_002243515.1	Tumebacillus algifaecis	positive	E	36		FALSE	FALSE	FALSE	FALSE		FALSE	TRUE	TN			FALSE	FALSE	TRUE	TN		FALSE	TRUE	TN			FALSE	TRUE	TN		FALSE	TRUE	TN
437	GCF_002243515.1_ASM224351v1_genomic_NZ_CP022657.1.region008.gbk	GCF_002243515.1	Tumebacillus algifaecis	positive	E	37		FALSE	FALSE	FALSE	FALSE		FALSE	TRUE	TN			FALSE	FALSE	TRUE	TN		FALSE	TRUE	TN			FALSE	TRUE	TN		FALSE	TRUE	TN
438	GCF_002243515.1_ASM224351v1_genomic_NZ_CP022657.1.region009.gbk	GCF_002243515.1	Tumebacillus algifaecis	positive	E	38		FALSE	FALSE	FALSE	FALSE		FALSE	TRUE	TN			FALSE	FALSE	TRUE	TN		FALSE	TRUE	TN			FALSE	TRUE	TN		FALSE	TRUE	TN
439	GCF_002243515.1_ASM224351v1_genomic_NZ_CP022657.1.region010.gbk	GCF_002243515.1	Tumebacillus algifaecis	positive	E	39		FALSE	FALSE	FALSE	FALSE		FALSE	TRUE	TN			FALSE	FALSE	TRUE	TN		FALSE	TRUE	TN			FALSE	TRUE	TN		FALSE	TRUE	TN
440	GCF_002243515.1_ASM224351v1_genomic_NZ_CP022657.1.region011.gbk	GCF_002243515.1	Tumebacillus algifaecis	positive	E	40		FALSE	FALSE	FALSE	FALSE		FALSE	TRUE	TN			FALSE	FALSE	TRUE	TN		FALSE	TRUE	TN			FALSE	TRUE	TN		FALSE	TRUE	TN
441	GCF_002243515.1_ASM224351v1_genomic_NZ_CP022657.1.region012.gbk	GCF_002243515.1	Tumebacillus algifaecis	positive	E	41		FALSE	FALSE	FALSE	FALSE		FALSE	TRUE	TN			FALSE	FALSE	TRUE	TN		FALSE	TRUE	TN			FALSE	TRUE	TN		FALSE	TRUE	TN
442	GCF_002243515.1_ASM224351v1_genomic_NZ_CP022657.1.region013.gbk	GCF_002243515.1	Tumebacillus algifaecis	positive	E	42		FALSE	FALSE	FALSE	FALSE		FALSE	TRUE	TN			FALSE	FALSE	TRUE	TN		FALSE	TRUE	TN			FALSE	TRUE	TN		FALSE	TRUE	TN
443	GCF_002243515.1_ASM224351v1_genomic_NZ_CP022657.1.region014.gbk	GCF_002243515.1	Tumebacillus algifaecis	positive	E	43		TRUE	TRUE	FALSE	FALSE		TRUE	TRUE	TP			TRUE	TRUE	TRUE	TP		FALSE	FALSE	FN			TRUE	TRUE	TP		FALSE	FALSE	FN
444	GCF_002263495.1_ASM226349v1_genomic_NZ_CP022753.1.region014.gbk	GCF_002263495.1	Nocardiopsis gilva YIM 90087	positive	E	44		TRUE	TRUE	TRUE	FALSE		TRUE	TRUE	TP			TRUE	TRUE	TRUE	TP		TRUE	TRUE	TP			TRUE	TRUE	TP		FALSE	FALSE	FN
445	GCF_002263515.1_ASM226351v1_genomic_NZ_CP022752.1.region008.gbk	GCF_002263515.1	Actinopolyspora erythraea	positive	E	45		FALSE	FALSE	FALSE	FALSE		FALSE	TRUE	TN			FALSE	FALSE	TRUE	TN		FALSE	TRUE	TN			FALSE	TRUE	TN		FALSE	TRUE	TN
446	GCF_002263515.1_ASM226351v1_genomic_NZ_CP022752.1.region020.gbk	GCF_002263515.1	Actinopolyspora erythraea	positive	E	46		FALSE	FALSE	FALSE	FALSE		FALSE	TRUE	TN			FALSE	FALSE	TRUE	TN		FALSE	TRUE	TN			FALSE	TRUE	TN		FALSE	TRUE	TN
447	GCF_002263515.1_ASM226351v1_genomic_NZ_CP022752.1.region023.gbk	GCF_002263515.1	Actinopolyspora erythraea	positive	E	47		FALSE	FALSE	FALSE	FALSE		FALSE	TRUE	TN			FALSE	FALSE	TRUE	TN		FALSE	TRUE	TN			FALSE	TRUE	TN		FALSE	TRUE	TN
448	GCF_002266435.2_ASM226643v2_genomic_NZ_CP029426.1.region002.gbk	GCF_002266435.2	Bradyrhizobium amphicarpaeae	negative	E	48		FALSE	FALSE	FALSE	FALSE		FALSE	TRUE	TN			FALSE	FALSE	TRUE	TN		FALSE	TRUE	TN			FALSE	TRUE	TN		FALSE	TRUE	TN
449	GCF_002269345.1_ASM226934v1_genomic_NZ_CP022889.1.region002.gbk	GCF_002269345.1	Tsuneonella mangrovi	negative	E	49		FALSE	FALSE	FALSE	FALSE		FALSE	TRUE	TN			FALSE	FALSE	TRUE	TN		FALSE	TRUE	TN			FALSE	TRUE	TN		FALSE	TRUE	TN
450	GCF_002291425.1_ASM229142v1_genomic_NZ_CP014136.1.region006.gbk	GCF_002291425.1	Gibbsiella quercinecans	negative	E	50		FALSE	FALSE	FALSE	FALSE		FALSE	TRUE	TN			FALSE	FALSE	TRUE	TN		FALSE	TRUE	TN			FALSE	TRUE	TN		FALSE	TRUE	TN
451	GCF_002291425.1_ASM229142v1_genomic_NZ_CP014136.1.region007.gbk	GCF_002291425.1	Gibbsiella quercinecans	negative	E	51		TRUE	TRUE	TRUE	FALSE		TRUE	TRUE	TP			TRUE	TRUE	TRUE	TP		TRUE	TRUE	TP			TRUE	TRUE	TP		TRUE	TRUE	TP
452	GCF_002291445.1_ASM229144v1_genomic_NZ_CP014137.1.region001.gbk	GCF_002291445.1	Brenneria goodwinii	negative	E	52		TRUE	TRUE	TRUE	FALSE		TRUE	TRUE	TP			TRUE	TRUE	TRUE	TP		FALSE	FALSE	FN			TRUE	TRUE	TP		TRUE	TRUE	TP
453	GCF_002291445.1_ASM229144v1_genomic_NZ_CP014137.1.region003.gbk	GCF_002291445.1	Brenneria goodwinii	negative	E	53		FALSE	FALSE	FALSE	FALSE		FALSE	TRUE	TN			FALSE	FALSE	TRUE	TN		FALSE	TRUE	TN			FALSE	TRUE	TN		FALSE	TRUE	TN
454	GCF_002291445.1_ASM229144v1_genomic_NZ_CP014137.1.region004.gbk	GCF_002291445.1	Brenneria goodwinii	negative	E	54		FALSE	FALSE	FALSE	FALSE		FALSE	TRUE	TN			FALSE	FALSE	TRUE	TN		FALSE	TRUE	TN			FALSE	TRUE	TN		FALSE	TRUE	TN
455	GCF_002291445.1_ASM229144v1_genomic_NZ_CP014137.1.region005.gbk	GCF_002291445.1	Brenneria goodwinii	negative	E	55		TRUE	FALSE	TRUE	FALSE		FALSE	FALSE	FN	genes elsewhere	salicylate genes elsewhere	TRUE	FALSE	FALSE	FN		FALSE	FALSE	FN			FALSE	FALSE	FN		TRUE	TRUE	TP
456	GCF_002305855.1_ASM230585v1_genomic_NZ_CP022163.1.region002.gbk	GCF_002305855.1	Melittangium boletus DSM 14713	negative	E	56		TRUE	TRUE	TRUE	FALSE		TRUE	TRUE	TP			TRUE	TRUE	TRUE	TP		FALSE	FALSE	FN			TRUE	TRUE	TP		FALSE	FALSE	FN
457	GCF_002305855.1_ASM230585v1_genomic_NZ_CP022163.1.region004.gbk	GCF_002305855.1	Melittangium boletus DSM 14713	negative	E	57		FALSE	FALSE	FALSE	FALSE		FALSE	TRUE	TN			FALSE	FALSE	TRUE	TN		TRUE	FALSE	FP	coincidental transport		TRUE	FALSE	FP		FALSE	TRUE	TN
458	GCF_002305855.1_ASM230585v1_genomic_NZ_CP022163.1.region016.gbk	GCF_002305855.1	Melittangium boletus DSM 14713	negative	E	58		FALSE	FALSE	FALSE	FALSE		FALSE	TRUE	TN			FALSE	FALSE	TRUE	TN		FALSE	TRUE	TN			FALSE	TRUE	TN		FALSE	TRUE	TN
459	GCF_002305855.1_ASM230585v1_genomic_NZ_CP022163.1.region022.gbk	GCF_002305855.1	Melittangium boletus DSM 14713	negative	E	59		FALSE	FALSE	FALSE	FALSE		FALSE	TRUE	TN			FALSE	FALSE	TRUE	TN		FALSE	TRUE	TN			FALSE	TRUE	TN		FALSE	TRUE	TN
460	GCF_002305855.1_ASM230585v1_genomic_NZ_CP022163.1.region024.gbk	GCF_002305855.1	Melittangium boletus DSM 14713	negative	E	60		FALSE	FALSE	FALSE	FALSE		FALSE	TRUE	TN			FALSE	FALSE	TRUE	TN		FALSE	TRUE	TN			FALSE	TRUE	TN		FALSE	TRUE	TN
461	GCF_002305855.1_ASM230585v1_genomic_NZ_CP022163.1.region027.gbk	GCF_002305855.1	Melittangium boletus DSM 14713	negative	E	61		FALSE	FALSE	FALSE	FALSE		FALSE	TRUE	TN			FALSE	FALSE	TRUE	TN		FALSE	TRUE	TN			FALSE	TRUE	TN		TRUE	FALSE	FP
462	GCF_002305855.1_ASM230585v1_genomic_NZ_CP022163.1.region028.gbk	GCF_002305855.1	Melittangium boletus DSM 14713	negative	E	62		FALSE	FALSE	FALSE	FALSE		FALSE	TRUE	TN			FALSE	FALSE	TRUE	TN		FALSE	TRUE	TN			FALSE	TRUE	TN		FALSE	TRUE	TN
463	GCF_002305855.1_ASM230585v1_genomic_NZ_CP022163.1.region030.gbk	GCF_002305855.1	Melittangium boletus DSM 14713	negative	E	63		FALSE	FALSE	FALSE	FALSE		FALSE	TRUE	TN			FALSE	FALSE	TRUE	TN		FALSE	TRUE	TN			FALSE	TRUE	TN		FALSE	TRUE	TN
464	GCF_002305855.1_ASM230585v1_genomic_NZ_CP022163.1.region032.gbk	GCF_002305855.1	Melittangium boletus DSM 14713	negative	E	64		FALSE	FALSE	FALSE	FALSE		FALSE	TRUE	TN			FALSE	FALSE	TRUE	TN		FALSE	TRUE	TN			FALSE	TRUE	TN		FALSE	TRUE	TN
465	GCF_002305855.1_ASM230585v1_genomic_NZ_CP022163.1.region033.gbk	GCF_002305855.1	Melittangium boletus DSM 14713	negative	E	65		FALSE	FALSE	FALSE	FALSE		FALSE	TRUE	TN			FALSE	FALSE	TRUE	TN		FALSE	TRUE	TN			FALSE	TRUE	TN		TRUE	FALSE	FP
466	GCF_002355215.1_ASM235521v1_genomic_NZ_AP014612.1.region008.gbk	GCF_002355215.1	Streptococcus troglodytae	positive	E	66		FALSE	FALSE	FALSE	FALSE		FALSE	TRUE	TN			FALSE	FALSE	TRUE	TN		FALSE	TRUE	TN			FALSE	TRUE	TN		FALSE	TRUE	TN
467	GCF_002355375.1_ASM235537v1_genomic_NZ_AP017312.1.region004.gbk	GCF_002355375.1	Aneurinibacillus soli	negative	E	67		FALSE	FALSE	FALSE	FALSE		FALSE	TRUE	TN			FALSE	FALSE	TRUE	TN		FALSE	TRUE	TN			FALSE	TRUE	TN		FALSE	TRUE	TN
468	GCF_002355595.1_F._lacunae_YT21-2_genomic_NZ_AP017422.1.region002.gbk	GCF_002355595.1	Filimonas lacunae	negative	E	68		FALSE	FALSE	FALSE	FALSE		FALSE	TRUE	TN			FALSE	FALSE	TRUE	TN		FALSE	TRUE	TN			FALSE	TRUE	TN		FALSE	TRUE	TN
469	GCF_002355595.1_F._lacunae_YT21-2_genomic_NZ_AP017422.1.region004.gbk	GCF_002355595.1	Filimonas lacunae	negative	E	69		FALSE	FALSE	FALSE	FALSE		FALSE	TRUE	TN			FALSE	FALSE	TRUE	TN		FALSE	TRUE	TN			FALSE	TRUE	TN		TRUE	FALSE	FP
470	GCF_002355735.1_ASM235573v1_genomic_NZ_AP014879.1.region002.gbk	GCF_002355735.1	Sulfuricaulis limicola	negative	E	70		FALSE	FALSE	FALSE	FALSE		FALSE	TRUE	TN			FALSE	FALSE	TRUE	TN		FALSE	TRUE	TN			FALSE	TRUE	TN		FALSE	TRUE	TN
471	GCF_002441855.2_ASM244185v2_genomic_NZ_CP029487.1.region001.gbk	GCF_002441855.2	Eubacterium maltosivorans	positive	E	71		FALSE	FALSE	FALSE	FALSE		FALSE	TRUE	TN			FALSE	FALSE	TRUE	TN		FALSE	TRUE	TN			FALSE	TRUE	TN		FALSE	TRUE	TN
472	GCF_002441855.2_ASM244185v2_genomic_NZ_CP029487.1.region006.gbk	GCF_002441855.2	Eubacterium maltosivorans	positive	E	72		FALSE	FALSE	FALSE	FALSE		FALSE	TRUE	TN			FALSE	FALSE	TRUE	TN		FALSE	TRUE	TN			FALSE	TRUE	TN		FALSE	TRUE	TN
473	GCF_002752675.1_ASM275267v1_genomic_NZ_CP024608.1.region003.gbk	GCF_002752675.1	Massilia violaceinigra	negative	E	73		FALSE	FALSE	FALSE	FALSE		FALSE	TRUE	TN			FALSE	FALSE	TRUE	TN		FALSE	TRUE	TN			FALSE	TRUE	TN		FALSE	TRUE	TN
474	GCF_002752675.1_ASM275267v1_genomic_NZ_CP024608.1.region004.gbk	GCF_002752675.1	Massilia violaceinigra	negative	E	74		TRUE	TRUE	TRUE	FALSE		TRUE	TRUE	TP			TRUE	TRUE	TRUE	TP		FALSE	FALSE	FN			TRUE	TRUE	TP		TRUE	TRUE	TP
475	GCF_002752675.1_ASM275267v1_genomic_NZ_CP024608.1.region010.gbk	GCF_002752675.1	Massilia violaceinigra	negative	E	75		FALSE	FALSE	FALSE	FALSE		FALSE	TRUE	TN			FALSE	FALSE	TRUE	TN		FALSE	TRUE	TN			FALSE	TRUE	TN		FALSE	TRUE	TN
476	GCF_002752675.1_ASM275267v1_genomic_NZ_CP024608.1.region011.gbk	GCF_002752675.1	Massilia violaceinigra	negative	E	76		FALSE	FALSE	FALSE	FALSE		FALSE	TRUE	TN			FALSE	FALSE	TRUE	TN		FALSE	TRUE	TN			FALSE	TRUE	TN		FALSE	TRUE	TN
477	GCF_002752675.1_ASM275267v1_genomic_NZ_CP024608.1.region012.gbk	GCF_002752675.1	Massilia violaceinigra	negative	E	77		TRUE	TRUE	TRUE	TRUE		TRUE	TRUE	TP			TRUE	TRUE	TRUE	TP		TRUE	TRUE	TP			TRUE	TRUE	TP		TRUE	TRUE	TP
478	GCF_002764115.1_ASM276411v1_genomic_NZ_CP017945.1.region002.gbk	GCF_002764115.1	Phyllobacterium zundukense	negative	E	78		TRUE	TRUE	TRUE	FALSE		TRUE	TRUE	TP			TRUE	TRUE	TRUE	TP		TRUE	TRUE	TP			TRUE	TRUE	TP		TRUE	TRUE	TP
479	GCF_002844375.1_ASM284437v1_genomic_NZ_CP024200.1.region002.gbk	GCF_002844375.1	Thalassospira marina	negative	E	79		FALSE	FALSE	FALSE	FALSE		FALSE	TRUE	TN			FALSE	FALSE	TRUE	TN		FALSE	TRUE	TN			FALSE	TRUE	TN		FALSE	TRUE	TN
480	GCF_002863865.1_ASM286386v1_genomic_NZ_CP022684.1.region001.gbk	GCF_002863865.1	Ketobacter alkanivorans	negative	E	80		FALSE	FALSE	FALSE	FALSE		FALSE	TRUE	TN			FALSE	FALSE	TRUE	TN		FALSE	TRUE	TN			FALSE	TRUE	TN		FALSE	TRUE	TN
481	GCF_002863865.1_ASM286386v1_genomic_NZ_CP022684.1.region010.gbk	GCF_002863865.1	Ketobacter alkanivorans	negative	E	81		FALSE	FALSE	FALSE	FALSE		FALSE	TRUE	TN			FALSE	FALSE	TRUE	TN		FALSE	TRUE	TN			FALSE	TRUE	TN		FALSE	TRUE	TN
482	GCF_002892535.1_ASM289253v1_genomic_NZ_CP024847.1.region001.gbk	GCF_002892535.1	Aquella oligotrophica	negative	E	82		TRUE	FALSE	TRUE	FALSE	NOVEL?	FALSE	FALSE	FN	novel synth	Could be novel synth	TRUE	FALSE	FALSE	FN		TRUE	TRUE	TP			TRUE	TRUE	TP		FALSE	FALSE	FN
483	GCF_002952055.1_ASM295205v1_genomic_NZ_CP021255.1.region001.gbk	GCF_002952055.1	Desulfobulbus oralis	negative	E	83		TRUE	FALSE	TRUE	FALSE		FALSE	FALSE	FN	genes missing	sal genes missing	TRUE	FALSE	FALSE	FN		FALSE	FALSE	FN			FALSE	FALSE	FN		TRUE	TRUE	TP
484	GCF_002993285.1_ASM299328v1_genomic_NZ_CP027433.1.region003.gbk	GCF_002993285.1	Gordonia iterans	positive	E	84		FALSE	FALSE	FALSE	FALSE		FALSE	TRUE	TN			FALSE	FALSE	TRUE	TN		FALSE	TRUE	TN			FALSE	TRUE	TN		FALSE	TRUE	TN
485	GCF_002993285.1_ASM299328v1_genomic_NZ_CP027433.1.region004.gbk	GCF_002993285.1	Gordonia iterans	positive	E	85		TRUE	TRUE	TRUE	TRUE		TRUE	TRUE	TP			TRUE	TRUE	TRUE	TP		TRUE	TRUE	TP			TRUE	TRUE	TP		FALSE	FALSE	FN
486	GCF_002993285.1_ASM299328v1_genomic_NZ_CP027433.1.region009.gbk	GCF_002993285.1	Gordonia iterans	positive	E	86		FALSE	FALSE	FALSE	FALSE		FALSE	TRUE	TN			FALSE	FALSE	TRUE	TN		FALSE	TRUE	TN			FALSE	TRUE	TN		FALSE	TRUE	TN
487	GCF_003008535.1_ASM300853v1_genomic_NZ_CP027666.1.region001.gbk	GCF_003008535.1	Ottowia oryzae	negative	E	87		TRUE	FALSE	TRUE	FALSE		FALSE	FALSE	FN	genes missing	dhb genes missing	TRUE	FALSE	FALSE	FN		TRUE	TRUE	TP			TRUE	TRUE	TP		FALSE	FALSE	FN
488	GCF_003012915.1_ASM301291v1_genomic_NZ_CP027770.1.region003.gbk	GCF_003012915.1	Staphylococcus felis	positive	E	88		FALSE	FALSE	FALSE	FALSE		FALSE	TRUE	TN			FALSE	FALSE	TRUE	TN		FALSE	TRUE	TN			FALSE	TRUE	TN		FALSE	TRUE	TN
489	GCF_003015185.1_ASM301518v1_genomic_NZ_CP027860.1.region002.gbk	GCF_003015185.1	Ahniella affigens	negative	E	89		FALSE	FALSE	FALSE	FALSE		FALSE	TRUE	TN			FALSE	FALSE	TRUE	TN		FALSE	TRUE	TN			FALSE	TRUE	TN		TRUE	FALSE	FP
490	GCF_003058465.1_ASM305846v1_genomic_NZ_CP028901.1.region006.gbk	GCF_003058465.1	Orrella marina	negative	E	90		TRUE	TRUE	TRUE	FALSE		TRUE	TRUE	TP			TRUE	TRUE	TRUE	TP		FALSE	FALSE	FN			TRUE	TRUE	TP		TRUE	TRUE	TP
491	GCF_003063625.1_ASM306362v1_genomic_NZ_CP026604.1.region003.gbk	GCF_003063625.1	Saccharobesus litoralis	negative	E	91		FALSE	FALSE	FALSE	FALSE		FALSE	TRUE	TN			FALSE	FALSE	TRUE	TN		FALSE	TRUE	TN			FALSE	TRUE	TN		TRUE	FALSE	FP
492	GCF_003072645.1_ASM307264v1_genomic_NZ_CP028897.1.region001.gbk	GCF_003072645.1	Dongshaea marina	negative	E	92		FALSE	FALSE	FALSE	FALSE		FALSE	TRUE	TN			FALSE	FALSE	TRUE	TN		FALSE	TRUE	TN			FALSE	TRUE	TN		FALSE	TRUE	TN
493	GCF_003072645.1_ASM307264v1_genomic_NZ_CP028897.1.region002.gbk	GCF_003072645.1	Dongshaea marina	negative	E	93		FALSE	FALSE	FALSE	FALSE		FALSE	TRUE	TN			FALSE	FALSE	TRUE	TN		FALSE	TRUE	TN			FALSE	TRUE	TN		FALSE	TRUE	TN
494	GCF_003076455.1_ASM307645v1_genomic_NZ_CP020918.1.region002.gbk	GCF_003076455.1	Flavobacterium faecale	negative	E	94		FALSE	FALSE	FALSE	FALSE		FALSE	TRUE	TN			FALSE	FALSE	TRUE	TN		FALSE	TRUE	TN			FALSE	TRUE	TN		FALSE	TRUE	TN
495	GCF_003122425.1_ASM312242v1_genomic_NZ_CP021660.1.region001.gbk	GCF_003122425.1	Candidatus Fukatsuia symbiotica	negative	E	95		FALSE	FALSE	FALSE	FALSE		FALSE	TRUE	TN			FALSE	FALSE	TRUE	TN		FALSE	TRUE	TN			FALSE	TRUE	TN		FALSE	TRUE	TN
496	GCF_003149515.1_ASM314951v1_genomic_NZ_CP029145.1.region002.gbk	GCF_003149515.1	Hymenobacter nivis	negative	E	96		FALSE	FALSE	FALSE	FALSE		FALSE	TRUE	TN			FALSE	FALSE	TRUE	TN		FALSE	TRUE	TN			FALSE	TRUE	TN		FALSE	TRUE	TN
497	GCF_003173015.1_ASM317301v1_genomic_NZ_CP029494.1.region001.gbk	GCF_003173015.1	Deinococcus irradiatisoli	positive	E	97		FALSE	FALSE	FALSE	FALSE		FALSE	TRUE	TN			FALSE	FALSE	TRUE	TN		FALSE	TRUE	TN			FALSE	TRUE	TN		FALSE	TRUE	TN
498	GCF_003176915.1_ASM317691v1_genomic_NZ_CP029619.1.region001.gbk	GCF_003176915.1	Candidatus Cardinium hertigii	negative	E	98		FALSE	FALSE	FALSE	FALSE		FALSE	TRUE	TN			FALSE	FALSE	TRUE	TN		FALSE	TRUE	TN			FALSE	TRUE	TN		FALSE	TRUE	TN
499	GCF_003261575.2_ASM326157v2_genomic_NZ_CP036175.1.region004.gbk	GCF_003261575.2	Klebsiella huaxiensis	negative	E	99		TRUE	TRUE	TRUE	TRUE		TRUE	TRUE	TP			TRUE	TRUE	TRUE	TP		TRUE	TRUE	TP			TRUE	TRUE	TP		TRUE	TRUE	TP
500	GCF_003325355.1_ASM332535v1_genomic_NZ_CP030850.1.region003.gbk	GCF_003325355.1	Runella rosea	negative	E	100		FALSE	FALSE	FALSE	FALSE		FALSE	TRUE	TN			FALSE	FALSE	TRUE	TN		FALSE	TRUE	TN			FALSE	TRUE	TN		FALSE	TRUE	TN
501	GCF_003330725.1_ASM333072v1_genomic_NZ_CP030840.1.region003.gbk	GCF_003330725.1	Acidisarcina polymorpha	#N/A	F	1		FALSE	FALSE	FALSE	FALSE		FALSE	TRUE	TN			FALSE	FALSE	TRUE	TN		FALSE	TRUE	TN			FALSE	TRUE	TN		FALSE	TRUE	TN
502	GCF_003339525.1_ASM333952v1_genomic_NZ_CP031124.1.region003.gbk	GCF_003339525.1	Ephemeroptericola cinctiostellae	negative	F	2		TRUE	TRUE	TRUE	TRUE		TRUE	TRUE	TP			TRUE	TRUE	TRUE	TP		TRUE	TRUE	TP			TRUE	TRUE	TP		TRUE	TRUE	TP
503	GCF_003352185.1_ASM335218v1_genomic_NZ_CP029608.1.region004.gbk	GCF_003352185.1	Pseudomonas kribbensis	negative	F	3		TRUE	TRUE	TRUE	FALSE		TRUE	TRUE	TP			TRUE	TRUE	TRUE	TP		FALSE	FALSE	FN			TRUE	TRUE	TP		TRUE	TRUE	TP
504	GCF_003352185.1_ASM335218v1_genomic_NZ_CP029608.1.region006.gbk	GCF_003352185.1	Pseudomonas kribbensis	negative	F	4		FALSE	FALSE	FALSE	FALSE		FALSE	TRUE	TN			FALSE	FALSE	TRUE	TN		FALSE	TRUE	TN			FALSE	TRUE	TN		TRUE	FALSE	FP
505	GCF_003352185.1_ASM335218v1_genomic_NZ_CP029608.1.region007.gbk	GCF_003352185.1	Pseudomonas kribbensis	negative	F	5		FALSE	FALSE	FALSE	FALSE		FALSE	TRUE	TN			FALSE	FALSE	TRUE	TN		FALSE	TRUE	TN			FALSE	TRUE	TN		FALSE	TRUE	TN
506	GCF_003352185.1_ASM335218v1_genomic_NZ_CP029608.1.region011.gbk	GCF_003352185.1	Pseudomonas kribbensis	negative	F	6		FALSE	FALSE	FALSE	FALSE		FALSE	TRUE	TN			FALSE	FALSE	TRUE	TN		FALSE	TRUE	TN			FALSE	TRUE	TN		FALSE	TRUE	TN
507	GCF_003555545.1_ASM355554v1_genomic_NZ_CP032157.1.region001.gbk	GCF_003555545.1	Paraflavitalea soli	negative	F	7		FALSE	FALSE	FALSE	FALSE		FALSE	TRUE	TN			FALSE	FALSE	TRUE	TN		FALSE	TRUE	TN			FALSE	TRUE	TN		TRUE	FALSE	FP
508	GCF_003555545.1_ASM355554v1_genomic_NZ_CP032157.1.region003.gbk	GCF_003555545.1	Paraflavitalea soli	negative	F	8		FALSE	FALSE	FALSE	FALSE		FALSE	TRUE	TN			FALSE	FALSE	TRUE	TN		FALSE	TRUE	TN			FALSE	TRUE	TN		TRUE	FALSE	FP
509	GCF_003584645.1_ASM358464v1_genomic_NZ_AP017928.1.region005.gbk	GCF_003584645.1	Methylocaldum marinum	negative	F	9		FALSE	FALSE	FALSE	FALSE		FALSE	TRUE	TN			FALSE	FALSE	TRUE	TN		FALSE	TRUE	TN			FALSE	TRUE	TN		FALSE	TRUE	TN
510	GCF_003584645.1_ASM358464v1_genomic_NZ_AP017928.1.region006.gbk	GCF_003584645.1	Methylocaldum marinum	negative	F	10		FALSE	FALSE	FALSE	FALSE		FALSE	TRUE	TN			FALSE	FALSE	TRUE	TN		FALSE	TRUE	TN			FALSE	TRUE	TN		FALSE	TRUE	TN
511	GCF_003584645.1_ASM358464v1_genomic_NZ_AP017928.1.region007.gbk	GCF_003584645.1	Methylocaldum marinum	negative	F	11		FALSE	FALSE	FALSE	FALSE		FALSE	TRUE	TN			FALSE	FALSE	TRUE	TN		TRUE	FALSE	FP	coincidental vitamin B12		TRUE	FALSE	FP		TRUE	FALSE	FP
512	GCF_003584645.1_ASM358464v1_genomic_NZ_AP017928.1.region013.gbk	GCF_003584645.1	Methylocaldum marinum	negative	F	12		FALSE	FALSE	FALSE	FALSE		FALSE	TRUE	TN			FALSE	FALSE	TRUE	TN		FALSE	TRUE	TN			FALSE	TRUE	TN		FALSE	TRUE	TN
513	GCF_003584645.1_ASM358464v1_genomic_NZ_AP017928.1.region017.gbk	GCF_003584645.1	Methylocaldum marinum	negative	F	13		FALSE	FALSE	FALSE	FALSE		FALSE	TRUE	TN			FALSE	FALSE	TRUE	TN		FALSE	TRUE	TN			FALSE	TRUE	TN		TRUE	FALSE	FP
514	GCF_003590145.2_ASM359014v2_genomic_NZ_CP060436.1.region004.gbk	GCF_003590145.2	Pseudooceanicola algae	negative	F	14		TRUE	TRUE	TRUE	FALSE		FALSE	FALSE	FN	genes elsewhere	catechol genes elsewhere	TRUE	FALSE	FALSE	FN		FALSE	FALSE	FN			FALSE	FALSE	FN		TRUE	TRUE	TP
515	GCF_003610015.1_ASM361001v1_genomic_NZ_AP018933.1.region002.gbk	GCF_003610015.1	Zymobacter palmae	negative	F	15		TRUE	TRUE	TRUE	FALSE		TRUE	TRUE	TP			TRUE	TRUE	TRUE	TP		FALSE	FALSE	FN			TRUE	TRUE	TP		TRUE	TRUE	TP
516	GCF_003610015.1_ASM361001v1_genomic_NZ_AP018933.1.region003.gbk	GCF_003610015.1	Zymobacter palmae	negative	F	16		TRUE	FALSE	TRUE	TRUE		FALSE	FALSE	FN	genes elsewhere	catechol genes elsewhere	TRUE	FALSE	FALSE	FN		TRUE	TRUE	TP			TRUE	TRUE	TP		TRUE	TRUE	TP
517	GCF_003610015.1_ASM361001v1_genomic_NZ_AP018933.1.region004.gbk	GCF_003610015.1	Zymobacter palmae	negative	F	17		FALSE	FALSE	FALSE	FALSE		FALSE	TRUE	TN			FALSE	FALSE	TRUE	TN		FALSE	TRUE	TN			FALSE	TRUE	TN		FALSE	TRUE	TN
518	GCF_003610015.1_ASM361001v1_genomic_NZ_AP018933.1.region005.gbk	GCF_003610015.1	Zymobacter palmae	negative	F	18		FALSE	FALSE	FALSE	FALSE		FALSE	TRUE	TN			FALSE	FALSE	TRUE	TN		FALSE	TRUE	TN			FALSE	TRUE	TN		FALSE	TRUE	TN
519	GCF_003627755.1_ASM362775v1_genomic_NZ_CP032695.1.region002.gbk	GCF_003627755.1	Rhizobium jaguaris	negative	F	19		FALSE	FALSE	FALSE	FALSE		FALSE	TRUE	TN			FALSE	FALSE	TRUE	TN		FALSE	TRUE	TN			FALSE	TRUE	TN		FALSE	TRUE	TN
520	GCF_003627755.1_ASM362775v1_genomic_NZ_CP032696.1.region001.gbk	GCF_003627755.1	Rhizobium jaguaris	negative	F	20		FALSE	FALSE	FALSE	FALSE		FALSE	TRUE	TN			FALSE	FALSE	TRUE	TN		FALSE	TRUE	TN			FALSE	TRUE	TN		FALSE	TRUE	TN
521	GCF_003627755.1_ASM362775v1_genomic_NZ_CP032696.1.region003.gbk	GCF_003627755.1	Rhizobium jaguaris	negative	F	21		FALSE	FALSE	FALSE	FALSE		FALSE	TRUE	TN			FALSE	FALSE	TRUE	TN		FALSE	TRUE	TN			FALSE	TRUE	TN		FALSE	TRUE	TN
522	GCF_003627755.1_ASM362775v1_genomic_NZ_CP032697.1.region001.gbk	GCF_003627755.1	Rhizobium jaguaris	negative	F	22		FALSE	FALSE	FALSE	FALSE		FALSE	TRUE	TN			FALSE	FALSE	TRUE	TN		FALSE	TRUE	TN			FALSE	TRUE	TN		FALSE	TRUE	TN
523	GCF_003687485.1_ASM368748v1_genomic_NZ_CP032050.1.region002.gbk	GCF_003687485.1	Euzebyella marina	negative	F	23		FALSE	FALSE	FALSE	FALSE		FALSE	TRUE	TN			FALSE	FALSE	TRUE	TN		FALSE	TRUE	TN			FALSE	TRUE	TN		FALSE	TRUE	TN
524	GCF_003687485.1_ASM368748v1_genomic_NZ_CP032050.1.region004.gbk	GCF_003687485.1	Euzebyella marina	negative	F	24		FALSE	FALSE	FALSE	FALSE		FALSE	TRUE	TN			FALSE	FALSE	TRUE	TN		FALSE	TRUE	TN			FALSE	TRUE	TN		FALSE	TRUE	TN
525	GCF_003815875.1_ASM381587v1_genomic_NZ_CP033924.1.region003.gbk	GCF_003815875.1	Chryseobacterium lactis	negative	F	25		FALSE	FALSE	FALSE	FALSE		FALSE	TRUE	TN			FALSE	FALSE	TRUE	TN		FALSE	TRUE	TN			FALSE	TRUE	TN		FALSE	TRUE	TN
526	GCF_003856495.1_ASM385649v1_genomic_NZ_CP034118.1.region006.gbk	GCF_003856495.1	Staphylospora marina	positive	F	26		FALSE	FALSE	FALSE	FALSE		FALSE	TRUE	TN			FALSE	FALSE	TRUE	TN		FALSE	TRUE	TN			FALSE	TRUE	TN		FALSE	TRUE	TN
527	GCF_003932735.1_ASM393273v1_genomic_NZ_CP033611.1.region001.gbk	GCF_003932735.1	Rickettsiales endosymbiont of Stachyamoeba lipophora	#N/A	F	27		FALSE	FALSE	FALSE	FALSE		FALSE	TRUE	TN			FALSE	FALSE	TRUE	TN		FALSE	TRUE	TN			FALSE	TRUE	TN		FALSE	TRUE	TN
528	GCF_003935895.2_ASM393589v2_genomic_NZ_CP054058.1.region003.gbk	GCF_003935895.2	Scandinavium goeteborgense	negative	F	28		TRUE	TRUE	TRUE	TRUE		TRUE	TRUE	TP			TRUE	TRUE	TRUE	TP		TRUE	TRUE	TP			TRUE	TRUE	TP		TRUE	TRUE	TP
529	GCF_003945385.1_ASM394538v1_genomic_NZ_AP018920.1.region006.gbk	GCF_003945385.1	Pseudonocardia autotrophica	positive	F	29		TRUE	TRUE	TRUE	FALSE		FALSE	FALSE	FN	genes elsewhere	catechol genes elsewhere	TRUE	FALSE	FALSE	FN		FALSE	FALSE	FN			FALSE	FALSE	FN		FALSE	FALSE	FN
530	GCF_003945385.1_ASM394538v1_genomic_NZ_AP018920.1.region009.gbk	GCF_003945385.1	Pseudonocardia autotrophica	positive	F	30		TRUE	FALSE	TRUE	TRUE		FALSE	FALSE	FN	genes elsewhere	catechol genes elsewhere	TRUE	FALSE	FALSE	FN		TRUE	TRUE	TP			TRUE	TRUE	TP		FALSE	FALSE	FN
531	GCF_003945385.1_ASM394538v1_genomic_NZ_AP018920.1.region010.gbk	GCF_003945385.1	Pseudonocardia autotrophica	positive	F	31		TRUE	TRUE	TRUE	TRUE		FALSE	FALSE	FN	genes elsewhere	ohorn gene elsewhere	TRUE	FALSE	FALSE	FN		TRUE	TRUE	TP			TRUE	TRUE	TP		FALSE	FALSE	FN
532	GCF_003955735.1_ASM395573v1_genomic_NZ_CP034464.1.region006.gbk	GCF_003955735.1	Undibacterium parvum	negative	F	32		TRUE	TRUE	TRUE	TRUE		TRUE	TRUE	TP			TRUE	TRUE	TRUE	TP		FALSE	FALSE	FN			TRUE	TRUE	TP		TRUE	TRUE	TP
533	GCF_003966895.1_ASM396689v1_genomic_NZ_AP018449.1.region001.gbk	GCF_003966895.1	Methylomusa anaerophila	negative	F	33		TRUE	FALSE	TRUE	FALSE	Cys-heavy	FALSE	FALSE	FN	novel synth	possible novel	TRUE	FALSE	FALSE	FN		TRUE	TRUE	TP			TRUE	TRUE	TP		TRUE	TRUE	TP
534	GCF_003966895.1_ASM396689v1_genomic_NZ_AP018449.1.region008.gbk	GCF_003966895.1	Methylomusa anaerophila	negative	F	34		TRUE	TRUE	TRUE	FALSE		TRUE	TRUE	TP			TRUE	TRUE	TRUE	TP		TRUE	TRUE	TP			TRUE	TRUE	TP		TRUE	TRUE	TP
535	GCF_003966895.1_ASM396689v1_genomic_NZ_AP018449.1.region009.gbk	GCF_003966895.1	Methylomusa anaerophila	negative	F	35		FALSE	FALSE	FALSE	FALSE		FALSE	TRUE	TN			FALSE	FALSE	TRUE	TN		FALSE	TRUE	TN			FALSE	TRUE	TN		FALSE	TRUE	TN
536	GCF_003966895.1_ASM396689v1_genomic_NZ_AP018449.1.region010.gbk	GCF_003966895.1	Methylomusa anaerophila	negative	F	36		FALSE	FALSE	FALSE	FALSE		FALSE	TRUE	TN			FALSE	FALSE	TRUE	TN		FALSE	TRUE	TN			FALSE	TRUE	TN		FALSE	TRUE	TN
537	GCF_003966975.1_ASM396697v1_genomic_NZ_AP018437.1.region002.gbk	GCF_003966975.1	Pelolinea submarina	negative	F	37		FALSE	FALSE	FALSE	FALSE		FALSE	TRUE	TN			FALSE	FALSE	TRUE	TN		FALSE	TRUE	TN			FALSE	TRUE	TN		FALSE	TRUE	TN
538	GCF_003991565.1_ASM399156v1_genomic_NZ_CP032819.1.region001.gbk	GCF_003991565.1	Butyricimonas faecalis	negative	F	38		FALSE	FALSE	FALSE	FALSE	has tonB, nothing else	FALSE	TRUE	TN			FALSE	FALSE	TRUE	TN		FALSE	TRUE	TN			FALSE	TRUE	TN		TRUE	FALSE	FP
539	GCF_003991975.1_ASM399197v1_genomic_NZ_CP029822.1.region002.gbk	GCF_003991975.1	Entomomonas moraniae	negative	F	39		TRUE	TRUE	TRUE	FALSE		TRUE	TRUE	TP			TRUE	TRUE	TRUE	TP		FALSE	FALSE	FN			TRUE	TRUE	TP		TRUE	TRUE	TP
540	GCF_003991975.1_ASM399197v1_genomic_NZ_CP029822.1.region003.gbk	GCF_003991975.1	Entomomonas moraniae	negative	F	40		FALSE	FALSE	FALSE	FALSE		FALSE	TRUE	TN			FALSE	FALSE	TRUE	TN		FALSE	TRUE	TN			FALSE	TRUE	TN		FALSE	TRUE	TN
541	GCF_003991975.1_ASM399197v1_genomic_NZ_CP029822.1.region004.gbk	GCF_003991975.1	Entomomonas moraniae	negative	F	41		FALSE	FALSE	FALSE	FALSE		FALSE	TRUE	TN			FALSE	FALSE	TRUE	TN		FALSE	TRUE	TN			FALSE	TRUE	TN		FALSE	TRUE	TN
542	GCF_004010955.1_ASM401095v1_genomic_NZ_CP025227.1.region002.gbk	GCF_004010955.1	Actinomyces wuliandei	positive	F	42		FALSE	FALSE	FALSE	FALSE		FALSE	TRUE	TN			FALSE	FALSE	TRUE	TN		FALSE	TRUE	TN			FALSE	TRUE	TN		FALSE	TRUE	TN
543	GCF_004010955.1_ASM401095v1_genomic_NZ_CP025227.1.region007.gbk	GCF_004010955.1	Actinomyces wuliandei	positive	F	43		TRUE	TRUE	TRUE	FALSE		TRUE	TRUE	TP			TRUE	TRUE	TRUE	TP		TRUE	TRUE	TP			TRUE	TRUE	TP		FALSE	FALSE	FN
544	GCF_004011095.1_ASM401109v1_genomic_NZ_CP028129.1.region004.gbk	GCF_004011095.1	Rathayibacter rathayi	positive	F	44		TRUE	TRUE	TRUE	FALSE		TRUE	TRUE	TP			TRUE	TRUE	TRUE	TP		TRUE	TRUE	TP			TRUE	TRUE	TP		FALSE	FALSE	FN
545	GCF_004022565.1_ASM402256v1_genomic_NZ_CP022987.1.region005.gbk	GCF_004022565.1	Pusillimonas thiosulfatoxidans	negative	F	45		FALSE	FALSE	FALSE	FALSE		FALSE	TRUE	TN			FALSE	FALSE	TRUE	TN		FALSE	TRUE	TN			FALSE	TRUE	TN		FALSE	TRUE	TN
546	GCF_004114895.1_ASM411489v1_genomic_NZ_CP035299.1.region002.gbk	GCF_004114895.1	Corynebacterium pelargi	positive	F	46		TRUE	TRUE	TRUE	FALSE		TRUE	TRUE	TP			TRUE	TRUE	TRUE	TP		TRUE	TRUE	TP			TRUE	TRUE	TP		FALSE	FALSE	FN
547	GCF_004124315.2_ASM412431v2_genomic_NZ_CP096889.1.region002.gbk	GCF_004124315.2	Bacillus cabrialesii	positive	F	47		FALSE	FALSE	FALSE	FALSE		FALSE	TRUE	TN			FALSE	FALSE	TRUE	TN		FALSE	TRUE	TN			FALSE	TRUE	TN		FALSE	TRUE	TN
548	GCF_004124315.2_ASM412431v2_genomic_NZ_CP096889.1.region003.gbk	GCF_004124315.2	Bacillus cabrialesii	positive	F	48		FALSE	FALSE	FALSE	FALSE		FALSE	TRUE	TN			FALSE	FALSE	TRUE	TN		FALSE	TRUE	TN			FALSE	TRUE	TN		FALSE	TRUE	TN
549	GCF_004124315.2_ASM412431v2_genomic_NZ_CP096889.1.region004.gbk	GCF_004124315.2	Bacillus cabrialesii	positive	F	49		FALSE	FALSE	FALSE	FALSE		FALSE	TRUE	TN			FALSE	FALSE	TRUE	TN		FALSE	TRUE	TN			FALSE	TRUE	TN		FALSE	TRUE	TN
550	GCF_004124315.2_ASM412431v2_genomic_NZ_CP096889.1.region007.gbk	GCF_004124315.2	Bacillus cabrialesii	positive	F	50		TRUE	TRUE	FALSE	TRUE		TRUE	TRUE	TP			TRUE	TRUE	TRUE	TP		FALSE	FALSE	FN			TRUE	TRUE	TP		FALSE	FALSE	FN
551	GCF_004135385.1_ASM413538v1_genomic_NZ_CP035493.1.region004.gbk	GCF_004135385.1	Xylanimonas protaetiae	positive	F	51		TRUE	TRUE	TRUE	FALSE		TRUE	TRUE	TP			TRUE	TRUE	TRUE	TP		TRUE	TRUE	TP			TRUE	TRUE	TP		FALSE	FALSE	FN
552	GCF_004139715.1_ASM413971v1_genomic_NZ_CP035544.1.region003.gbk	GCF_004139715.1	Muriicola soli	negative	F	52		FALSE	FALSE	FALSE	FALSE		FALSE	TRUE	TN			FALSE	FALSE	TRUE	TN		FALSE	TRUE	TN			FALSE	TRUE	TN		FALSE	TRUE	TN
553	GCF_004208415.1_ASM420841v1_genomic_NZ_CP035758.1.region003.gbk	GCF_004208415.1	Ktedonosporobacter rubrisoli	negative	F	53		FALSE	FALSE	FALSE	FALSE		FALSE	TRUE	TN			FALSE	FALSE	TRUE	TN		FALSE	TRUE	TN			FALSE	TRUE	TN		FALSE	TRUE	TN
554	GCF_004208415.1_ASM420841v1_genomic_NZ_CP035758.1.region007.gbk	GCF_004208415.1	Ktedonosporobacter rubrisoli	negative	F	54		FALSE	FALSE	FALSE	FALSE		FALSE	TRUE	TN			FALSE	FALSE	TRUE	TN		FALSE	TRUE	TN			FALSE	TRUE	TN		FALSE	TRUE	TN
555	GCF_004208415.1_ASM420841v1_genomic_NZ_CP035758.1.region011.gbk	GCF_004208415.1	Ktedonosporobacter rubrisoli	negative	F	55		FALSE	FALSE	FALSE	FALSE	only ABC	FALSE	TRUE	TN			FALSE	FALSE	TRUE	TN		FALSE	TRUE	TN			FALSE	TRUE	TN		FALSE	TRUE	TN
556	GCF_004208415.1_ASM420841v1_genomic_NZ_CP035758.1.region013.gbk	GCF_004208415.1	Ktedonosporobacter rubrisoli	negative	F	56		FALSE	FALSE	FALSE	FALSE		FALSE	TRUE	TN			FALSE	FALSE	TRUE	TN		FALSE	TRUE	TN			FALSE	TRUE	TN		FALSE	TRUE	TN
557	GCF_004208415.1_ASM420841v1_genomic_NZ_CP035758.1.region014.gbk	GCF_004208415.1	Ktedonosporobacter rubrisoli	negative	F	57		FALSE	FALSE	FALSE	FALSE		FALSE	TRUE	TN			FALSE	FALSE	TRUE	TN		FALSE	TRUE	TN			FALSE	TRUE	TN		FALSE	TRUE	TN
558	GCF_004208415.1_ASM420841v1_genomic_NZ_CP035758.1.region016.gbk	GCF_004208415.1	Ktedonosporobacter rubrisoli	negative	F	58		FALSE	FALSE	FALSE	FALSE		FALSE	TRUE	TN			FALSE	FALSE	TRUE	TN		FALSE	TRUE	TN			FALSE	TRUE	TN		FALSE	TRUE	TN
559	GCF_004208415.1_ASM420841v1_genomic_NZ_CP035758.1.region023.gbk	GCF_004208415.1	Ktedonosporobacter rubrisoli	negative	F	59		FALSE	FALSE	FALSE	FALSE		FALSE	TRUE	TN			FALSE	FALSE	TRUE	TN		FALSE	TRUE	TN			FALSE	TRUE	TN		FALSE	TRUE	TN
560	GCF_004322755.1_ASM432275v1_genomic_NZ_CP036401.1.region008.gbk	GCF_004322755.1	Massilia albidiflava	negative	F	60		FALSE	FALSE	FALSE	FALSE		FALSE	TRUE	TN			FALSE	FALSE	TRUE	TN		FALSE	TRUE	TN			FALSE	TRUE	TN		FALSE	TRUE	TN
561	GCF_004322755.1_ASM432275v1_genomic_NZ_CP036401.1.region010.gbk	GCF_004322755.1	Massilia albidiflava	negative	F	61		FALSE	FALSE	FALSE	FALSE		FALSE	TRUE	TN			FALSE	FALSE	TRUE	TN		FALSE	TRUE	TN			FALSE	TRUE	TN		FALSE	TRUE	TN
562	GCF_004323735.1_ASM432373v1_genomic_NZ_CP036455.1.region006.gbk	GCF_004323735.1	Streptomonospora litoralis	positive	F	62		TRUE	TRUE	TRUE	FALSE	Similar to fuscachelin, has halogenase	TRUE	TRUE	TP			TRUE	TRUE	TRUE	TP		FALSE	FALSE	FN			TRUE	TRUE	TP		FALSE	FALSE	FN
563	GCF_004421105.1_ASM442110v1_genomic_NZ_CP038033.1.region004.gbk	GCF_004421105.1	Nitrosococcus wardiae	negative	F	63		TRUE	TRUE	TRUE	TRUE		TRUE	TRUE	TP			TRUE	TRUE	TRUE	TP		FALSE	FALSE	FN			TRUE	TRUE	TP		TRUE	TRUE	TP
564	GCF_004684345.1_ASM468434v1_genomic_NZ_CP038469.1.region002.gbk	GCF_004684345.1	Citrobacter tructae	negative	F	64		TRUE	TRUE	TRUE	TRUE		TRUE	TRUE	TP			TRUE	TRUE	TRUE	TP		TRUE	TRUE	TP			TRUE	TRUE	TP		TRUE	TRUE	TP
565	GCF_004792415.1_ASM479241v1_genomic_NZ_CP038853.1.region006.gbk	GCF_004792415.1	Pantoea vagans	negative	F	65		TRUE	TRUE	TRUE	TRUE		TRUE	TRUE	TP			TRUE	TRUE	TRUE	TP		TRUE	TRUE	TP			TRUE	TRUE	TP		TRUE	TRUE	TP
566	GCF_004798685.1_ASM479868v1_genomic_NZ_CP039291.1.region006.gbk	GCF_004798685.1	Cellulomonas shaoxiangyii	positive	F	66		FALSE	FALSE	FALSE	FALSE		FALSE	TRUE	TN			FALSE	FALSE	TRUE	TN		FALSE	TRUE	TN			FALSE	TRUE	TN		FALSE	TRUE	TN
567	GCF_005116655.2_ASM511665v2_genomic_NZ_CP050698.1.region006.gbk	GCF_005116655.2	Desulfosediminicola flagellatus	#N/A	F	67		FALSE	FALSE	FALSE	FALSE		FALSE	TRUE	TN			FALSE	FALSE	TRUE	TN		FALSE	TRUE	TN			FALSE	TRUE	TN		FALSE	TRUE	TN
568	GCF_005116655.2_ASM511665v2_genomic_NZ_CP050698.1.region007.gbk	GCF_005116655.2	Desulfosediminicola flagellatus	#N/A	F	68		FALSE	FALSE	FALSE	FALSE		FALSE	TRUE	TN			FALSE	FALSE	TRUE	TN		FALSE	TRUE	TN			FALSE	TRUE	TN		FALSE	TRUE	TN
569	GCF_005144905.1_ASM514490v1_genomic_NZ_CP039700.1.region002.gbk	GCF_005144905.1	Vibrio cyclitrophicus	negative	F	69		TRUE	TRUE	TRUE	FALSE		TRUE	TRUE	TP			TRUE	TRUE	TRUE	TP		TRUE	TRUE	TP			TRUE	TRUE	TP		TRUE	TRUE	TP
570	GCF_005234135.1_ASM523413v1_genomic_NZ_CP039964.1.region002.gbk	GCF_005234135.1	Pseudorhodobacter turbinis	negative	F	70		TRUE	FALSE	TRUE	TRUE		TRUE	TRUE	TP			TRUE	TRUE	TRUE	TP		TRUE	TRUE	TP			TRUE	TRUE	TP		TRUE	TRUE	TP
571	GCF_005281475.1_ASM528147v1_genomic_NZ_CP040106.1.region004.gbk	GCF_005281475.1	Echinicola rosea	negative	F	71		FALSE	FALSE	FALSE	FALSE		FALSE	TRUE	TN			FALSE	FALSE	TRUE	TN		FALSE	TRUE	TN			FALSE	TRUE	TN		FALSE	TRUE	TN
572	GCF_005671395.1_ASM567139v1_genomic_NZ_CP040428.1.region005.gbk	GCF_005671395.1	Jejubacter calystegiae	negative	F	72		TRUE	TRUE	TRUE	TRUE		TRUE	TRUE	TP			TRUE	TRUE	TRUE	TP		TRUE	TRUE	TP			TRUE	TRUE	TP		TRUE	TRUE	TP
573	GCF_005952805.1_ASM595280v1_genomic_NZ_CP040709.1.region007.gbk	GCF_005952805.1	Inhella inkyongensis	negative	F	73		FALSE	FALSE	FALSE	FALSE		FALSE	TRUE	TN			FALSE	FALSE	TRUE	TN		FALSE	TRUE	TN			FALSE	TRUE	TN		FALSE	TRUE	TN
574	GCF_006337085.1_ASM633708v1_genomic_NZ_CP040882.1.region002.gbk	GCF_006337085.1	Sutterella faecalis	negative	F	74		FALSE	FALSE	FALSE	FALSE		FALSE	TRUE	TN			FALSE	FALSE	TRUE	TN		FALSE	TRUE	TN			FALSE	TRUE	TN		FALSE	TRUE	TN
575	GCF_006494775.1_ASM649477v1_genomic_NZ_CP041146.1.region001.gbk	GCF_006494775.1	Nocardioides humi	positive	F	75		TRUE	TRUE	TRUE	TRUE		TRUE	TRUE	TP			TRUE	TRUE	TRUE	TP		TRUE	TRUE	TP			TRUE	TRUE	TP		FALSE	FALSE	FN
576	GCF_006494775.1_ASM649477v1_genomic_NZ_CP041146.1.region006.gbk	GCF_006494775.1	Nocardioides humi	positive	F	76		TRUE	TRUE	TRUE	TRUE		TRUE	TRUE	TP			TRUE	TRUE	TRUE	TP		TRUE	TRUE	TP			TRUE	TRUE	TP		FALSE	FALSE	FN
577	GCF_006542275.1_ASM654227v1_genomic_NZ_CP041217.1.region001.gbk	GCF_006542275.1	Saccharibacillus brassicae	positive	F	77		FALSE	FALSE	FALSE	FALSE		FALSE	TRUE	TN			FALSE	FALSE	TRUE	TN		FALSE	TRUE	TN			FALSE	TRUE	TN		FALSE	TRUE	TN
578	GCF_006542275.1_ASM654227v1_genomic_NZ_CP041217.1.region002.gbk	GCF_006542275.1	Saccharibacillus brassicae	positive	F	78		FALSE	FALSE	FALSE	FALSE		FALSE	TRUE	TN			FALSE	FALSE	TRUE	TN		FALSE	TRUE	TN			FALSE	TRUE	TN		FALSE	TRUE	TN
579	GCF_006542275.1_ASM654227v1_genomic_NZ_CP041217.1.region004.gbk	GCF_006542275.1	Saccharibacillus brassicae	positive	F	79		FALSE	FALSE	FALSE	FALSE		FALSE	TRUE	TN			FALSE	FALSE	TRUE	TN		FALSE	TRUE	TN			FALSE	TRUE	TN		FALSE	TRUE	TN
580	GCF_006542275.1_ASM654227v1_genomic_NZ_CP041217.1.region008.gbk	GCF_006542275.1	Saccharibacillus brassicae	positive	F	80		FALSE	FALSE	FALSE	FALSE		FALSE	TRUE	TN			FALSE	FALSE	TRUE	TN		FALSE	TRUE	TN			FALSE	TRUE	TN		FALSE	TRUE	TN
581	GCF_007289895.1_ASM728989v1_genomic_NZ_CP041660.1.region001.gbk	GCF_007289895.1	Catenovulum sediminis	negative	F	81		FALSE	FALSE	FALSE	FALSE		FALSE	TRUE	TN			FALSE	FALSE	TRUE	TN		FALSE	TRUE	TN			FALSE	TRUE	TN		TRUE	FALSE	FP
582	GCF_007289895.1_ASM728989v1_genomic_NZ_CP041660.1.region002.gbk	GCF_007289895.1	Catenovulum sediminis	negative	F	82		FALSE	FALSE	FALSE	FALSE		FALSE	TRUE	TN			FALSE	FALSE	TRUE	TN		FALSE	TRUE	TN			FALSE	TRUE	TN		TRUE	FALSE	FP
583	GCF_007431345.1_ASM743134v1_genomic_NZ_CP041730.1.region001.gbk	GCF_007431345.1	Chitinimonas arctica	negative	F	83		FALSE	FALSE	FALSE	FALSE		FALSE	TRUE	TN			FALSE	FALSE	TRUE	TN		FALSE	TRUE	TN			FALSE	TRUE	TN		FALSE	TRUE	TN
584	GCF_007431345.1_ASM743134v1_genomic_NZ_CP041730.1.region005.gbk	GCF_007431345.1	Chitinimonas arctica	negative	F	84		TRUE	FALSE	TRUE	TRUE		FALSE	FALSE	FN	genes elsewhere	dhb elsewhere	TRUE	FALSE	FALSE	FN		TRUE	TRUE	TP			TRUE	TRUE	TP		TRUE	TRUE	TP
585	GCF_007431345.1_ASM743134v1_genomic_NZ_CP041730.1.region011.gbk	GCF_007431345.1	Chitinimonas arctica	negative	F	85		FALSE	FALSE	FALSE	FALSE		FALSE	TRUE	TN			FALSE	FALSE	TRUE	TN		FALSE	TRUE	TN			FALSE	TRUE	TN		FALSE	TRUE	TN
586	GCF_007641255.1_ASM764125v1_genomic_NZ_CP036259.1.region001.gbk	GCF_007641255.1	Sporomusa termitida	positive	F	86		TRUE	FALSE	TRUE	TRUE		FALSE	FALSE	FN	novel synth	Salicylate replaced with a menaquinone intermediate?	TRUE	FALSE	FALSE	FN		FALSE	FALSE	FN			FALSE	FALSE	FN		TRUE	TRUE	TP
587	GCF_007747215.1_ASM774721v1_genomic_NZ_CP036273.1.region009.gbk	GCF_007747215.1	Urbifossiella limnaea	negative	F	87		FALSE	FALSE	FALSE	FALSE		FALSE	TRUE	TN			FALSE	FALSE	TRUE	TN		FALSE	TRUE	TN			FALSE	TRUE	TN		FALSE	TRUE	TN
588	GCF_007750855.1_ASM775085v1_genomic_NZ_CP036291.1.region001.gbk	GCF_007750855.1	Pirellulimonas nuda	negative	F	88		FALSE	FALSE	FALSE	FALSE		FALSE	TRUE	TN			FALSE	FALSE	TRUE	TN		FALSE	TRUE	TN			FALSE	TRUE	TN		FALSE	TRUE	TN
589	GCF_007750855.1_ASM775085v1_genomic_NZ_CP036291.1.region008.gbk	GCF_007750855.1	Pirellulimonas nuda	negative	F	89		FALSE	FALSE	FALSE	FALSE		FALSE	TRUE	TN			FALSE	FALSE	TRUE	TN		FALSE	TRUE	TN			FALSE	TRUE	TN		FALSE	TRUE	TN
590	GCF_007750855.1_ASM775085v1_genomic_NZ_CP036291.1.region009.gbk	GCF_007750855.1	Pirellulimonas nuda	negative	F	90		FALSE	FALSE	FALSE	FALSE		FALSE	TRUE	TN			FALSE	FALSE	TRUE	TN		FALSE	TRUE	TN			FALSE	TRUE	TN		FALSE	TRUE	TN
591	GCF_007751715.1_ASM775171v1_genomic_NZ_CP036292.1.region001.gbk	GCF_007751715.1	Rosistilla oblonga	negative	F	91		FALSE	FALSE	FALSE	FALSE		FALSE	TRUE	TN			FALSE	FALSE	TRUE	TN		FALSE	TRUE	TN			FALSE	TRUE	TN		FALSE	TRUE	TN
592	GCF_007751715.1_ASM775171v1_genomic_NZ_CP036292.1.region007.gbk	GCF_007751715.1	Rosistilla oblonga	negative	F	92		FALSE	FALSE	FALSE	FALSE		FALSE	TRUE	TN			FALSE	FALSE	TRUE	TN		FALSE	TRUE	TN			FALSE	TRUE	TN		FALSE	TRUE	TN
593	GCF_007751715.1_ASM775171v1_genomic_NZ_CP036292.1.region010.gbk	GCF_007751715.1	Rosistilla oblonga	negative	F	93		FALSE	FALSE	FALSE	FALSE		FALSE	TRUE	TN			FALSE	FALSE	TRUE	TN		FALSE	TRUE	TN			FALSE	TRUE	TN		FALSE	TRUE	TN
594	GCF_007795095.1_ASM779509v1_genomic_NZ_CP042218.1.region002.gbk	GCF_007795095.1	Luteimonas granuli	negative	F	94		FALSE	FALSE	FALSE	FALSE		FALSE	TRUE	TN			FALSE	FALSE	TRUE	TN		FALSE	TRUE	TN			FALSE	TRUE	TN		TRUE	FALSE	FP
595	GCF_007855645.1_ASM785564v1_genomic_NZ_CP042264.1.region001.gbk	GCF_007855645.1	Qingshengfaniella alkalisoli	negative	F	95		TRUE	TRUE	FALSE	FALSE		FALSE	FALSE	FN	genes elsewhere	dhb elsewhere	TRUE	FALSE	FALSE	FN		FALSE	FALSE	FN			FALSE	FALSE	FN		FALSE	FALSE	FN
596	GCF_007858975.2_ASM785897v2_genomic_NZ_CP042220.2.region003.gbk	GCF_007858975.2	Dickeya poaceiphila	negative	F	96		TRUE	TRUE	TRUE	TRUE		TRUE	TRUE	TP			TRUE	TRUE	TRUE	TP		TRUE	TRUE	TP			TRUE	TRUE	TP		TRUE	TRUE	TP
597	GCF_007858975.2_ASM785897v2_genomic_NZ_CP042220.2.region004.gbk	GCF_007858975.2	Dickeya poaceiphila	negative	F	97		FALSE	FALSE	FALSE	FALSE		FALSE	TRUE	TN			FALSE	FALSE	TRUE	TN		FALSE	TRUE	TN			FALSE	TRUE	TN		FALSE	TRUE	TN
598	GCF_007858975.2_ASM785897v2_genomic_NZ_CP042220.2.region008.gbk	GCF_007858975.2	Dickeya poaceiphila	negative	F	98		FALSE	FALSE	FALSE	FALSE		FALSE	TRUE	TN			FALSE	FALSE	TRUE	TN		FALSE	TRUE	TN			FALSE	TRUE	TN		FALSE	TRUE	TN
599	GCF_007995155.1_ASM799515v1_genomic_NZ_CP042593.1.region001.gbk	GCF_007995155.1	Bacillus dafuensis	positive	F	99		FALSE	FALSE	FALSE	FALSE		FALSE	TRUE	TN			FALSE	FALSE	TRUE	TN		FALSE	TRUE	TN			FALSE	TRUE	TN		FALSE	TRUE	TN
600	GCF_008033135.1_ASM803313v1_genomic_NZ_CP041335.1.region001.gbk	GCF_008033135.1	Chitinolyticbacter meiyuanensis	#N/A	F	100		TRUE	TRUE	TRUE	FALSE		TRUE	TRUE	TP			TRUE	TRUE	TRUE	TP		FALSE	FALSE	FN			TRUE	TRUE	TP		TRUE	TRUE	TP
601	GCF_008065135.1_ASM806513v1_genomic_NZ_CP042914.1.region003.gbk	GCF_008065135.1	Roseimaritima ulvae	negative	G	1		FALSE	FALSE	FALSE	FALSE		FALSE	TRUE	TN			FALSE	FALSE	TRUE	TN		FALSE	TRUE	TN			FALSE	TRUE	TN		FALSE	TRUE	TN
602	GCF_008087625.1_ASM808762v1_genomic_NZ_CP042997.1.region004.gbk	GCF_008087625.1	Aquisphaera giovannonii	negative	G	2		FALSE	FALSE	FALSE	FALSE		FALSE	TRUE	TN			FALSE	FALSE	TRUE	TN		FALSE	TRUE	TN			FALSE	TRUE	TN		FALSE	TRUE	TN
603	GCF_008087625.1_ASM808762v1_genomic_NZ_CP042997.1.region008.gbk	GCF_008087625.1	Aquisphaera giovannonii	negative	G	3		FALSE	FALSE	FALSE	FALSE		FALSE	TRUE	TN			FALSE	FALSE	TRUE	TN		FALSE	TRUE	TN			FALSE	TRUE	TN		FALSE	TRUE	TN
604	GCF_008087665.1_ASM808766v1_genomic_NZ_CP042912.1.region002.gbk	GCF_008087665.1	Mariniblastus fucicola	negative	G	4		FALSE	FALSE	FALSE	FALSE		FALSE	TRUE	TN			FALSE	FALSE	TRUE	TN		FALSE	TRUE	TN			FALSE	TRUE	TN		FALSE	TRUE	TN
605	GCF_008087665.1_ASM808766v1_genomic_NZ_CP042912.1.region004.gbk	GCF_008087665.1	Mariniblastus fucicola	negative	G	5		FALSE	FALSE	FALSE	FALSE		FALSE	TRUE	TN			FALSE	FALSE	TRUE	TN		FALSE	TRUE	TN			FALSE	TRUE	TN		FALSE	TRUE	TN
606	GCF_008119665.1_ASM811966v1_genomic_NZ_CP043046.1.region001.gbk	GCF_008119665.1	Pigmentiphaga aceris	negative	G	6		TRUE	FALSE	TRUE	FALSE		FALSE	FALSE	FN	genes elsewhere	dhb elsewhere	TRUE	FALSE	FALSE	FN		TRUE	TRUE	TP			TRUE	TRUE	TP		FALSE	FALSE	FN
607	GCF_008151785.1_ASM815178v1_genomic_NZ_CP036523.1.region002.gbk	GCF_008151785.1	Peptacetobacter hiranonis	positive	G	7		FALSE	FALSE	FALSE	FALSE		FALSE	TRUE	TN			FALSE	FALSE	TRUE	TN		FALSE	TRUE	TN			FALSE	TRUE	TN		FALSE	TRUE	TN
608	GCF_008275125.1_ASM827512v1_genomic_NZ_CP043473.1.region001.gbk	GCF_008275125.1	Chromobacterium paludis	negative	G	8		FALSE	FALSE	FALSE	FALSE		FALSE	TRUE	TN			FALSE	FALSE	TRUE	TN		FALSE	TRUE	TN			FALSE	TRUE	TN		FALSE	TRUE	TN
609	GCF_008275125.1_ASM827512v1_genomic_NZ_CP043473.1.region002.gbk	GCF_008275125.1	Chromobacterium paludis	negative	G	9		TRUE	TRUE	TRUE	FALSE		TRUE	TRUE	TP			TRUE	TRUE	TRUE	TP		TRUE	TRUE	TP			TRUE	TRUE	TP		TRUE	TRUE	TP
610	GCF_008329945.1_ASM832994v1_genomic_NZ_CP035807.1.region004.gbk	GCF_008329945.1	Thiospirochaeta perfilievii	negative	G	10		FALSE	FALSE	FALSE	FALSE		FALSE	TRUE	TN			FALSE	FALSE	TRUE	TN		FALSE	TRUE	TN			FALSE	TRUE	TN		FALSE	TRUE	TN
611	GCF_008632455.1_ASM863245v1_genomic_NZ_CP043929.1.region006.gbk	GCF_008632455.1	Methylomonas rhizoryzae	negative	G	11		TRUE	FALSE	TRUE	FALSE	NOVEL?	FALSE	FALSE	FN	novel synth	novel synthesis?	TRUE	FALSE	FALSE	FN		FALSE	FALSE	FN			FALSE	FALSE	FN		TRUE	TRUE	TP
612	GCF_008632455.1_ASM863245v1_genomic_NZ_CP043929.1.region007.gbk	GCF_008632455.1	Methylomonas rhizoryzae	negative	G	12		FALSE	FALSE	FALSE	FALSE		FALSE	TRUE	TN			FALSE	FALSE	TRUE	TN		FALSE	TRUE	TN			FALSE	TRUE	TN		FALSE	TRUE	TN
613	GCF_008632455.1_ASM863245v1_genomic_NZ_CP043929.1.region010.gbk	GCF_008632455.1	Methylomonas rhizoryzae	negative	G	13		TRUE	TRUE	FALSE	FALSE		TRUE	TRUE	TP			TRUE	TRUE	TRUE	TP		FALSE	FALSE	FN			TRUE	TRUE	TP		TRUE	TRUE	TP
614	GCF_008824185.1_ASM882418v1_genomic_NZ_CP044423.1.region001.gbk	GCF_008824185.1	Paracoccus pantotrophus	negative	G	14		TRUE	TRUE	TRUE	FALSE		TRUE	TRUE	TP			TRUE	TRUE	TRUE	TP		TRUE	TRUE	TP			TRUE	TRUE	TP		TRUE	TRUE	TP
615	GCF_008824185.1_ASM882418v1_genomic_NZ_CP044426.1.region001.gbk	GCF_008824185.1	Paracoccus pantotrophus	negative	G	15		TRUE	FALSE	TRUE	FALSE		FALSE	FALSE	FN	genes elsewhere	dhb elsewhere	TRUE	FALSE	FALSE	FN		TRUE	TRUE	TP			TRUE	TRUE	TP		FALSE	FALSE	FN
616	GCF_008973485.1_ASM897348v1_genomic_NZ_CP031223.1.region005.gbk	GCF_008973485.1	Psychrobacillus glaciei	positive	G	16		FALSE	FALSE	FALSE	FALSE		FALSE	TRUE	TN			FALSE	FALSE	TRUE	TN		FALSE	TRUE	TN			FALSE	TRUE	TN		FALSE	TRUE	TN
617	GCF_009002475.1_ASM900247v1_genomic_NZ_AP019860.1.region001.gbk	GCF_009002475.1	Candidatus Uabimicrobium amorphum	negative	G	17		FALSE	FALSE	FALSE	FALSE		FALSE	TRUE	TN			FALSE	FALSE	TRUE	TN		FALSE	TRUE	TN			FALSE	TRUE	TN		FALSE	TRUE	TN
618	GCF_009002475.1_ASM900247v1_genomic_NZ_AP019860.1.region005.gbk	GCF_009002475.1	Candidatus Uabimicrobium amorphum	negative	G	18		FALSE	FALSE	FALSE	FALSE		FALSE	TRUE	TN			FALSE	FALSE	TRUE	TN		FALSE	TRUE	TN			FALSE	TRUE	TN		FALSE	TRUE	TN
619	GCF_009002475.1_ASM900247v1_genomic_NZ_AP019860.1.region010.gbk	GCF_009002475.1	Candidatus Uabimicrobium amorphum	negative	G	19		FALSE	FALSE	FALSE	FALSE		FALSE	TRUE	TN			FALSE	FALSE	TRUE	TN		FALSE	TRUE	TN			FALSE	TRUE	TN		FALSE	TRUE	TN
620	GCF_009002475.1_ASM900247v1_genomic_NZ_AP019860.1.region013.gbk	GCF_009002475.1	Candidatus Uabimicrobium amorphum	negative	G	20		FALSE	FALSE	FALSE	FALSE		FALSE	TRUE	TN			FALSE	FALSE	TRUE	TN		FALSE	TRUE	TN			FALSE	TRUE	TN		FALSE	TRUE	TN
621	GCF_009002475.1_ASM900247v1_genomic_NZ_AP019860.1.region015.gbk	GCF_009002475.1	Candidatus Uabimicrobium amorphum	negative	G	21		FALSE	FALSE	FALSE	FALSE		FALSE	TRUE	TN			FALSE	FALSE	TRUE	TN		FALSE	TRUE	TN			FALSE	TRUE	TN		FALSE	TRUE	TN
622	GCF_009363155.1_ASM936315v1_genomic_NZ_CP045302.1.region001.gbk	GCF_009363155.1	Azotobacter salinestris	negative	G	22		FALSE	FALSE	FALSE	FALSE		FALSE	TRUE	TN			FALSE	FALSE	TRUE	TN		FALSE	TRUE	TN			FALSE	TRUE	TN		FALSE	TRUE	TN
623	GCF_009363155.1_ASM936315v1_genomic_NZ_CP045302.1.region004.gbk	GCF_009363155.1	Azotobacter salinestris	negative	G	23		TRUE	TRUE	TRUE	TRUE		TRUE	TRUE	TP			TRUE	TRUE	TRUE	TP		FALSE	FALSE	FN			TRUE	TRUE	TP		TRUE	TRUE	TP
624	GCF_009498035.1_ASM949803v1_genomic_NZ_CP034550.1.region017.gbk	GCF_009498035.1	Saccharothrix syringae	positive	G	24		FALSE	FALSE	FALSE	FALSE		TRUE	FALSE	FP	questionable hits	coincidental orn_monoox	FALSE	TRUE	FALSE	FP		FALSE	TRUE	TN			TRUE	FALSE	FP		FALSE	TRUE	TN
625	GCF_009498035.1_ASM949803v1_genomic_NZ_CP034550.1.region021.gbk	GCF_009498035.1	Saccharothrix syringae	positive	G	25		FALSE	FALSE	FALSE	FALSE		FALSE	TRUE	TN			FALSE	FALSE	TRUE	TN		FALSE	TRUE	TN			FALSE	TRUE	TN		FALSE	TRUE	TN
626	GCF_009498035.1_ASM949803v1_genomic_NZ_CP034550.1.region027.gbk	GCF_009498035.1	Saccharothrix syringae	positive	G	26		FALSE	FALSE	FALSE	FALSE		FALSE	TRUE	TN			FALSE	FALSE	TRUE	TN		FALSE	TRUE	TN			FALSE	TRUE	TN		FALSE	TRUE	TN
627	GCF_009498035.1_ASM949803v1_genomic_NZ_CP034550.1.region028.gbk	GCF_009498035.1	Saccharothrix syringae	positive	G	27		FALSE	FALSE	FALSE	FALSE		FALSE	TRUE	TN			FALSE	FALSE	TRUE	TN		FALSE	TRUE	TN			FALSE	TRUE	TN		FALSE	TRUE	TN
628	GCF_009498035.1_ASM949803v1_genomic_NZ_CP034550.1.region032.gbk	GCF_009498035.1	Saccharothrix syringae	positive	G	28		FALSE	FALSE	FALSE	FALSE		FALSE	TRUE	TN			FALSE	FALSE	TRUE	TN		FALSE	TRUE	TN			FALSE	TRUE	TN		FALSE	TRUE	TN
629	GCF_009498035.1_ASM949803v1_genomic_NZ_CP034550.1.region033.gbk	GCF_009498035.1	Saccharothrix syringae	positive	G	29		FALSE	FALSE	FALSE	FALSE		FALSE	TRUE	TN			FALSE	FALSE	TRUE	TN		FALSE	TRUE	TN			FALSE	TRUE	TN		FALSE	TRUE	TN
630	GCF_009498035.1_ASM949803v1_genomic_NZ_CP034550.1.region035.gbk	GCF_009498035.1	Saccharothrix syringae	positive	G	30		FALSE	FALSE	FALSE	FALSE		FALSE	TRUE	TN			FALSE	FALSE	TRUE	TN		FALSE	TRUE	TN			FALSE	TRUE	TN		FALSE	TRUE	TN
631	GCF_009498035.1_ASM949803v1_genomic_NZ_CP034550.1.region036.gbk	GCF_009498035.1	Saccharothrix syringae	positive	G	31		FALSE	FALSE	FALSE	FALSE		FALSE	TRUE	TN			FALSE	FALSE	TRUE	TN		FALSE	TRUE	TN			FALSE	TRUE	TN		FALSE	TRUE	TN
632	GCF_009498035.1_ASM949803v1_genomic_NZ_CP034550.1.region037.gbk	GCF_009498035.1	Saccharothrix syringae	positive	G	32		FALSE	FALSE	FALSE	FALSE		FALSE	TRUE	TN			FALSE	FALSE	TRUE	TN		FALSE	TRUE	TN			FALSE	TRUE	TN		FALSE	TRUE	TN
633	GCF_009498035.1_ASM949803v1_genomic_NZ_CP034550.1.region039.gbk	GCF_009498035.1	Saccharothrix syringae	positive	G	33		FALSE	FALSE	FALSE	FALSE		FALSE	TRUE	TN			FALSE	FALSE	TRUE	TN		FALSE	TRUE	TN			FALSE	TRUE	TN		FALSE	TRUE	TN
634	GCF_009498035.1_ASM949803v1_genomic_NZ_CP034550.1.region040.gbk	GCF_009498035.1	Saccharothrix syringae	positive	G	34		TRUE	TRUE	TRUE	TRUE		TRUE	TRUE	TP			TRUE	TRUE	TRUE	TP		TRUE	TRUE	TP			TRUE	TRUE	TP		FALSE	FALSE	FN
635	GCF_009498035.1_ASM949803v1_genomic_NZ_CP034550.1.region042.gbk	GCF_009498035.1	Saccharothrix syringae	positive	G	35		FALSE	FALSE	FALSE	FALSE		FALSE	TRUE	TN			FALSE	FALSE	TRUE	TN		FALSE	TRUE	TN			FALSE	TRUE	TN		FALSE	TRUE	TN
636	GCF_009498035.1_ASM949803v1_genomic_NZ_CP034550.1.region043.gbk	GCF_009498035.1	Saccharothrix syringae	positive	G	36		FALSE	FALSE	FALSE	FALSE		FALSE	TRUE	TN			FALSE	FALSE	TRUE	TN		FALSE	TRUE	TN			FALSE	TRUE	TN		FALSE	TRUE	TN
637	GCF_009498235.1_ASM949823v1_genomic_NZ_CP044205.1.region002.gbk	GCF_009498235.1	Candidatus Methylospira mobilis	negative	G	37		FALSE	FALSE	FALSE	FALSE		FALSE	TRUE	TN			FALSE	FALSE	TRUE	TN		FALSE	TRUE	TN			FALSE	TRUE	TN		FALSE	TRUE	TN
638	GCF_009498235.1_ASM949823v1_genomic_NZ_CP044205.1.region011.gbk	GCF_009498235.1	Candidatus Methylospira mobilis	negative	G	38		FALSE	FALSE	FALSE	FALSE		FALSE	TRUE	TN			FALSE	FALSE	TRUE	TN		FALSE	TRUE	TN			FALSE	TRUE	TN		FALSE	TRUE	TN
639	GCF_009498235.1_ASM949823v1_genomic_NZ_CP044205.1.region012.gbk	GCF_009498235.1	Candidatus Methylospira mobilis	negative	G	39		FALSE	FALSE	FALSE	FALSE	MAYBE: TonB, pepsy, otherwise no?	FALSE	TRUE	TN			FALSE	FALSE	TRUE	TN		FALSE	TRUE	TN			FALSE	TRUE	TN		TRUE	FALSE	FP
640	GCF_009650215.1_ASM965021v1_genomic_NZ_CP045851.1.region003.gbk	GCF_009650215.1	Actinomarinicola tropica	#N/A	G	40		FALSE	FALSE	FALSE	FALSE		FALSE	TRUE	TN			FALSE	FALSE	TRUE	TN		FALSE	TRUE	TN			FALSE	TRUE	TN		FALSE	TRUE	TN
641	GCF_009728935.1_ASM972893v1_genomic_NZ_CP034235.1.region002.gbk	GCF_009728935.1	Paenibacillus psychroresistens	positive	G	41		FALSE	FALSE	FALSE	FALSE		FALSE	TRUE	TN			FALSE	FALSE	TRUE	TN		FALSE	TRUE	TN			FALSE	TRUE	TN		FALSE	TRUE	TN
642	GCF_009789575.1_ASM978957v1_genomic_NZ_CP046908.1.region005.gbk	GCF_009789575.1	Stappia indica	negative	G	42		FALSE	FALSE	FALSE	FALSE		FALSE	TRUE	TN			FALSE	FALSE	TRUE	TN		FALSE	TRUE	TN			FALSE	TRUE	TN		FALSE	TRUE	TN
643	GCF_009789575.1_ASM978957v1_genomic_NZ_CP046908.1.region006.gbk	GCF_009789575.1	Stappia indica	negative	G	43		FALSE	FALSE	FALSE	FALSE		FALSE	TRUE	TN			FALSE	FALSE	TRUE	TN		FALSE	TRUE	TN			FALSE	TRUE	TN		TRUE	FALSE	FP
644	GCF_009789575.1_ASM978957v1_genomic_NZ_CP046908.1.region008.gbk	GCF_009789575.1	Stappia indica	negative	G	44		TRUE	TRUE	TRUE	FALSE	alkyl-salicylate	FALSE	FALSE	FN	5-alkylsalicylate	5-alkylsalicylate	TRUE	FALSE	FALSE	FN		FALSE	FALSE	FN			FALSE	FALSE	FN		TRUE	TRUE	TP
645	GCF_009831415.1_ASM983141v1_genomic_NZ_CP043727.1.region005.gbk	GCF_009831415.1	Yersinia canariae	negative	G	45		TRUE	TRUE	TRUE	TRUE		TRUE	TRUE	TP			TRUE	TRUE	TRUE	TP		TRUE	TRUE	TP			TRUE	TRUE	TP		TRUE	TRUE	TP
646	GCF_009856605.1_ASM985660v1_genomic_NZ_CP047242.1.region001.gbk	GCF_009856605.1	Trichormus variabilis 0441	negative	G	46		FALSE	FALSE	FALSE	FALSE		TRUE	FALSE	FP	questionable hits	questionable cyano_bh2	FALSE	TRUE	FALSE	FP		FALSE	TRUE	TN			TRUE	FALSE	FP		FALSE	TRUE	TN
647	GCF_009856605.1_ASM985660v1_genomic_NZ_CP047242.1.region004.gbk	GCF_009856605.1	Trichormus variabilis 0441	negative	G	47		FALSE	FALSE	FALSE	FALSE		FALSE	TRUE	TN			FALSE	FALSE	TRUE	TN		FALSE	TRUE	TN			FALSE	TRUE	TN		FALSE	TRUE	TN
648	GCF_009856605.1_ASM985660v1_genomic_NZ_CP047242.1.region006.gbk	GCF_009856605.1	Trichormus variabilis 0441	negative	G	48		FALSE	FALSE	FALSE	FALSE		FALSE	TRUE	TN			FALSE	FALSE	TRUE	TN		FALSE	TRUE	TN			FALSE	TRUE	TN		FALSE	TRUE	TN
649	GCF_009856605.1_ASM985660v1_genomic_NZ_CP047242.1.region010.gbk	GCF_009856605.1	Trichormus variabilis 0441	negative	G	49		FALSE	FALSE	FALSE	FALSE		FALSE	TRUE	TN			FALSE	FALSE	TRUE	TN		FALSE	TRUE	TN			FALSE	TRUE	TN		FALSE	TRUE	TN
650	GCF_009856605.1_ASM985660v1_genomic_NZ_CP047242.1.region015.gbk	GCF_009856605.1	Trichormus variabilis 0441	negative	G	50		FALSE	FALSE	FALSE	FALSE		FALSE	TRUE	TN			FALSE	FALSE	TRUE	TN		FALSE	TRUE	TN			FALSE	TRUE	TN		FALSE	TRUE	TN
651	GCF_009856605.1_ASM985660v1_genomic_NZ_CP047244.1.region001.gbk	GCF_009856605.1	Trichormus variabilis 0441	negative	G	51		TRUE	TRUE	TRUE	FALSE		TRUE	TRUE	TP			TRUE	TRUE	TRUE	TP		FALSE	FALSE	FN			TRUE	TRUE	TP		TRUE	TRUE	TP
652	GCF_009901525.1_ASM990152v1_genomic_NZ_CP019288.1.region001.gbk	GCF_009901525.1	Kordia antarctica	negative	G	52		FALSE	FALSE	FALSE	FALSE		FALSE	TRUE	TN			FALSE	FALSE	TRUE	TN		FALSE	TRUE	TN			FALSE	TRUE	TN		TRUE	FALSE	FP
653	GCF_009901525.1_ASM990152v1_genomic_NZ_CP019288.1.region003.gbk	GCF_009901525.1	Kordia antarctica	negative	G	53		FALSE	FALSE	FALSE	FALSE	looks like N-N bond	FALSE	TRUE	TN			FALSE	FALSE	TRUE	TN		FALSE	TRUE	TN			FALSE	TRUE	TN		TRUE	FALSE	FP
654	GCF_009914055.1_ASM991405v1_genomic_NZ_CP028271.1.region004.gbk	GCF_009914055.1	Mixta intestinalis	negative	G	54		TRUE	TRUE	TRUE	TRUE		TRUE	TRUE	TP			TRUE	TRUE	TRUE	TP		TRUE	TRUE	TP			TRUE	TRUE	TP		TRUE	TRUE	TP
655	GCF_010093065.1_ASM1009306v1_genomic_NZ_CP048113.1.region013.gbk	GCF_010093065.1	Chitinophaga agri	negative	G	55		FALSE	FALSE	FALSE	FALSE		FALSE	TRUE	TN			FALSE	FALSE	TRUE	TN		FALSE	TRUE	TN			FALSE	TRUE	TN		TRUE	FALSE	FP
656	GCF_010093065.1_ASM1009306v1_genomic_NZ_CP048113.1.region014.gbk	GCF_010093065.1	Chitinophaga agri	negative	G	56		FALSE	FALSE	FALSE	FALSE	tonB and tauD but no	FALSE	TRUE	TN			FALSE	FALSE	TRUE	TN		FALSE	TRUE	TN			FALSE	TRUE	TN		TRUE	FALSE	FP
657	GCF_010119975.1_ASM1011997v1_genomic_NZ_CP048222.1.region005.gbk	GCF_010119975.1	Rhodocytophaga rosea	negative	G	57		FALSE	FALSE	FALSE	FALSE		FALSE	TRUE	TN			FALSE	FALSE	TRUE	TN		FALSE	TRUE	TN			FALSE	TRUE	TN		FALSE	TRUE	TN
658	GCF_010669125.1_ASM1066912v1_genomic_NZ_CP048630.1.region003.gbk	GCF_010669125.1	Ancylobacter pratisalsi	negative	G	58		TRUE	TRUE	TRUE	FALSE		TRUE	TRUE	TP			TRUE	TRUE	TRUE	TP		TRUE	TRUE	TP			TRUE	TRUE	TP		FALSE	FALSE	FN
659	GCF_010669145.1_ASM1066914v1_genomic_NZ_CP048635.1.region002.gbk	GCF_010669145.1	Rhizobium oryzihabitans	negative	G	59		TRUE	TRUE	TRUE	TRUE		TRUE	TRUE	TP			TRUE	TRUE	TRUE	TP		TRUE	TRUE	TP			TRUE	TRUE	TP		TRUE	TRUE	TP
660	GCF_010731815.2_ASM1073181v2_genomic_NZ_AP022593.1.region016.gbk	GCF_010731815.2	Mycolicibacterium arabiense	positive	G	60		TRUE	TRUE	FALSE	FALSE		TRUE	TRUE	TP			TRUE	TRUE	TRUE	TP		FALSE	FALSE	FN			TRUE	TRUE	TP		FALSE	FALSE	FN
661	GCF_010977555.1_ASM1097755v1_genomic_NZ_CP048815.1.region003.gbk	GCF_010977555.1	Caulobacter rhizosphaerae	negative	G	61		FALSE	FALSE	FALSE	FALSE		FALSE	TRUE	TN			FALSE	FALSE	TRUE	TN		FALSE	TRUE	TN			FALSE	TRUE	TN		TRUE	FALSE	FP
662	GCF_011009015.1_ASM1100901v1_genomic_NZ_CP048878.1.region001.gbk	GCF_011009015.1	Spartinivicinus ruber	negative	G	62		FALSE	FALSE	FALSE	FALSE		FALSE	TRUE	TN			FALSE	FALSE	TRUE	TN		FALSE	TRUE	TN			FALSE	TRUE	TN		FALSE	TRUE	TN
663	GCF_011009015.1_ASM1100901v1_genomic_NZ_CP048878.1.region003.gbk	GCF_011009015.1	Spartinivicinus ruber	negative	G	63		FALSE	FALSE	FALSE	FALSE		FALSE	TRUE	TN			FALSE	FALSE	TRUE	TN		FALSE	TRUE	TN			FALSE	TRUE	TN		FALSE	TRUE	TN
664	GCF_011009015.1_ASM1100901v1_genomic_NZ_CP048878.1.region013.gbk	GCF_011009015.1	Spartinivicinus ruber	negative	G	64		FALSE	FALSE	FALSE	FALSE		FALSE	TRUE	TN			FALSE	FALSE	TRUE	TN		FALSE	TRUE	TN			FALSE	TRUE	TN		FALSE	TRUE	TN
665	GCF_011009015.1_ASM1100901v1_genomic_NZ_CP048878.1.region014.gbk	GCF_011009015.1	Spartinivicinus ruber	negative	G	65		FALSE	FALSE	FALSE	FALSE		FALSE	TRUE	TN			FALSE	FALSE	TRUE	TN		FALSE	TRUE	TN			FALSE	TRUE	TN		FALSE	TRUE	TN
666	GCF_011046975.1_ASM1104697v1_genomic_NZ_CP049253.1.region002.gbk	GCF_011046975.1	Microbacterium amylolyticum	positive	G	66		FALSE	FALSE	FALSE	FALSE		FALSE	TRUE	TN			FALSE	FALSE	TRUE	TN		FALSE	TRUE	TN			FALSE	TRUE	TN		FALSE	TRUE	TN
667	GCF_011617705.1_ASM1161770v1_genomic_NZ_CP050154.1.region003.gbk	GCF_011617705.1	Brevibacterium limosum	positive	G	67		FALSE	FALSE	FALSE	FALSE		FALSE	TRUE	TN			FALSE	FALSE	TRUE	TN		FALSE	TRUE	TN			FALSE	TRUE	TN		FALSE	TRUE	TN
668	GCF_011694815.1_ASM1169481v1_genomic_NZ_CP050177.1.region002.gbk	GCF_011694815.1	Streptomyces liangshanensis	positive	G	68		FALSE	FALSE	FALSE	FALSE		FALSE	TRUE	TN			FALSE	FALSE	TRUE	TN		FALSE	TRUE	TN			FALSE	TRUE	TN		FALSE	TRUE	TN
669	GCF_011694815.1_ASM1169481v1_genomic_NZ_CP050177.1.region005.gbk	GCF_011694815.1	Streptomyces liangshanensis	positive	G	69		FALSE	FALSE	FALSE	FALSE		FALSE	TRUE	TN			FALSE	FALSE	TRUE	TN		FALSE	TRUE	TN			FALSE	TRUE	TN		FALSE	TRUE	TN
670	GCF_011694815.1_ASM1169481v1_genomic_NZ_CP050177.1.region011.gbk	GCF_011694815.1	Streptomyces liangshanensis	positive	G	70		FALSE	FALSE	FALSE	FALSE		FALSE	TRUE	TN			FALSE	FALSE	TRUE	TN		FALSE	TRUE	TN			FALSE	TRUE	TN		FALSE	TRUE	TN
671	GCF_011694815.1_ASM1169481v1_genomic_NZ_CP050177.1.region015.gbk	GCF_011694815.1	Streptomyces liangshanensis	positive	G	71		FALSE	FALSE	FALSE	FALSE		FALSE	TRUE	TN			FALSE	FALSE	TRUE	TN		FALSE	TRUE	TN			FALSE	TRUE	TN		FALSE	TRUE	TN
672	GCF_011694815.1_ASM1169481v1_genomic_NZ_CP050177.1.region017.gbk	GCF_011694815.1	Streptomyces liangshanensis	positive	G	72		FALSE	FALSE	FALSE	FALSE		FALSE	TRUE	TN			FALSE	FALSE	TRUE	TN		FALSE	TRUE	TN			FALSE	TRUE	TN		FALSE	TRUE	TN
673	GCF_011694815.1_ASM1169481v1_genomic_NZ_CP050177.1.region020.gbk	GCF_011694815.1	Streptomyces liangshanensis	positive	G	73		TRUE	TRUE	TRUE	FALSE		TRUE	TRUE	TP			TRUE	TRUE	TRUE	TP		TRUE	TRUE	TP			TRUE	TRUE	TP		FALSE	FALSE	FN
674	GCF_011694815.1_ASM1169481v1_genomic_NZ_CP050177.1.region022.gbk	GCF_011694815.1	Streptomyces liangshanensis	positive	G	74		FALSE	FALSE	FALSE	FALSE		FALSE	TRUE	TN			FALSE	FALSE	TRUE	TN		FALSE	TRUE	TN			FALSE	TRUE	TN		FALSE	TRUE	TN
675	GCF_011764505.1_ASM1176450v1_genomic_NZ_AP022839.1.region005.gbk	GCF_011764505.1	Legionella antarctica	negative	G	75		FALSE	FALSE	FALSE	FALSE		FALSE	TRUE	TN			FALSE	FALSE	TRUE	TN		FALSE	TRUE	TN			FALSE	TRUE	TN		FALSE	TRUE	TN
676	GCF_011764545.1_ASM1176454v1_genomic_NZ_AP022870.1.region001.gbk	GCF_011764545.1	Phytohabitans flavus	positive	G	76		FALSE	FALSE	FALSE	FALSE		FALSE	TRUE	TN			FALSE	FALSE	TRUE	TN		FALSE	TRUE	TN			FALSE	TRUE	TN		FALSE	TRUE	TN
677	GCF_011764545.1_ASM1176454v1_genomic_NZ_AP022870.1.region006.gbk	GCF_011764545.1	Phytohabitans flavus	positive	G	77		FALSE	FALSE	FALSE	FALSE		FALSE	TRUE	TN			FALSE	FALSE	TRUE	TN		FALSE	TRUE	TN			FALSE	TRUE	TN		FALSE	TRUE	TN
678	GCF_011764545.1_ASM1176454v1_genomic_NZ_AP022870.1.region008.gbk	GCF_011764545.1	Phytohabitans flavus	positive	G	78		FALSE	FALSE	FALSE	FALSE		FALSE	TRUE	TN			FALSE	FALSE	TRUE	TN		FALSE	TRUE	TN			FALSE	TRUE	TN		FALSE	TRUE	TN
679	GCF_011764545.1_ASM1176454v1_genomic_NZ_AP022870.1.region013.gbk	GCF_011764545.1	Phytohabitans flavus	positive	G	79		FALSE	FALSE	FALSE	FALSE		FALSE	TRUE	TN			FALSE	FALSE	TRUE	TN		FALSE	TRUE	TN			FALSE	TRUE	TN		FALSE	TRUE	TN
680	GCF_011764545.1_ASM1176454v1_genomic_NZ_AP022870.1.region014.gbk	GCF_011764545.1	Phytohabitans flavus	positive	G	80		TRUE	TRUE	TRUE	FALSE		TRUE	TRUE	TP			TRUE	TRUE	TRUE	TP		TRUE	TRUE	TP			TRUE	TRUE	TP		FALSE	FALSE	FN
681	GCF_012222965.1_ASM1222296v1_genomic_NZ_CP038241.1.region003.gbk	GCF_012222965.1	Allofrancisella inopinata	negative	G	81		FALSE	FALSE	FALSE	FALSE		FALSE	TRUE	TN			FALSE	FALSE	TRUE	TN		FALSE	TRUE	TN			FALSE	TRUE	TN		FALSE	TRUE	TN
682	GCF_012427845.1_ASM1242784v1_genomic_NZ_CP038498.1.region001.gbk	GCF_012427845.1	Pectobacterium punjabense	negative	G	82		TRUE	TRUE	TRUE	FALSE		TRUE	TRUE	TP			TRUE	TRUE	TRUE	TP		FALSE	FALSE	FN			TRUE	TRUE	TP		TRUE	TRUE	TP
683	GCF_012516395.1_ASM1251639v1_genomic_NZ_CP051206.1.region002.gbk	GCF_012516395.1	Dolichospermum flos-aquae CCAP 1403/13F	#N/A	G	83		FALSE	FALSE	FALSE	FALSE		FALSE	TRUE	TN			FALSE	FALSE	TRUE	TN		FALSE	TRUE	TN			FALSE	TRUE	TN		FALSE	TRUE	TN
684	GCF_012516395.1_ASM1251639v1_genomic_NZ_CP051206.1.region004.gbk	GCF_012516395.1	Dolichospermum flos-aquae CCAP 1403/13F	#N/A	G	84		FALSE	FALSE	FALSE	FALSE		FALSE	TRUE	TN			FALSE	FALSE	TRUE	TN		FALSE	TRUE	TN			FALSE	TRUE	TN		FALSE	TRUE	TN
685	GCF_012516395.1_ASM1251639v1_genomic_NZ_CP051206.1.region009.gbk	GCF_012516395.1	Dolichospermum flos-aquae CCAP 1403/13F	#N/A	G	85		FALSE	FALSE	FALSE	FALSE		FALSE	TRUE	TN			FALSE	FALSE	TRUE	TN		FALSE	TRUE	TN			FALSE	TRUE	TN		FALSE	TRUE	TN
686	GCF_012516395.1_ASM1251639v1_genomic_NZ_CP051206.1.region011.gbk	GCF_012516395.1	Dolichospermum flos-aquae CCAP 1403/13F	#N/A	G	86		FALSE	FALSE	FALSE	FALSE		FALSE	TRUE	TN			FALSE	FALSE	TRUE	TN		FALSE	TRUE	TN			FALSE	TRUE	TN		FALSE	TRUE	TN
687	GCF_012516395.1_ASM1251639v1_genomic_NZ_CP051206.1.region015.gbk	GCF_012516395.1	Dolichospermum flos-aquae CCAP 1403/13F	#N/A	G	87		FALSE	FALSE	FALSE	FALSE		FALSE	TRUE	TN			FALSE	FALSE	TRUE	TN		FALSE	TRUE	TN			FALSE	TRUE	TN		FALSE	TRUE	TN
688	GCF_012769535.1_ASM1276953v1_genomic_NZ_CP046565.1.region007.gbk	GCF_012769535.1	Methylococcus geothermalis	negative	G	88		FALSE	FALSE	FALSE	FALSE		FALSE	TRUE	TN			FALSE	FALSE	TRUE	TN		FALSE	TRUE	TN			FALSE	TRUE	TN		FALSE	TRUE	TN
689	GCF_012913485.1_ASM1291348v1_genomic_NZ_CP051774.1.region001.gbk	GCF_012913485.1	Luteolibacter luteus	negative	G	89		FALSE	FALSE	FALSE	FALSE		FALSE	TRUE	TN			FALSE	FALSE	TRUE	TN		FALSE	TRUE	TN			FALSE	TRUE	TN		FALSE	TRUE	TN
690	GCF_012913485.1_ASM1291348v1_genomic_NZ_CP051774.1.region006.gbk	GCF_012913485.1	Luteolibacter luteus	negative	G	90		FALSE	FALSE	FALSE	FALSE		FALSE	TRUE	TN			FALSE	FALSE	TRUE	TN		FALSE	TRUE	TN			FALSE	TRUE	TN		FALSE	TRUE	TN
691	GCF_012932215.1_ASM1293221v1_genomic_NZ_CP048788.1.region001.gbk	GCF_012932215.1	Roseobacter ponti	negative	G	91		FALSE	FALSE	FALSE	FALSE		FALSE	TRUE	TN			FALSE	FALSE	TRUE	TN		FALSE	TRUE	TN			FALSE	TRUE	TN		FALSE	TRUE	TN
692	GCF_013127955.1_ASM1312795v1_genomic_NZ_CP053435.1.region003.gbk	GCF_013127955.1	Spirosoma taeanense	negative	G	92		FALSE	FALSE	FALSE	FALSE		FALSE	TRUE	TN			FALSE	FALSE	TRUE	TN		FALSE	TRUE	TN			FALSE	TRUE	TN		FALSE	TRUE	TN
693	GCF_013128195.2_ASM1312819v2_genomic_NZ_CP053452.2.region006.gbk	GCF_013128195.2	Frigoriglobus tundricola	negative	G	93		FALSE	FALSE	FALSE	FALSE		FALSE	TRUE	TN			FALSE	FALSE	TRUE	TN		FALSE	TRUE	TN			FALSE	TRUE	TN		FALSE	TRUE	TN
694	GCF_013201075.1_ASM1320107v1_genomic_NZ_CP053708.1.region005.gbk	GCF_013201075.1	Lichenicola cladoniae	negative	G	94		FALSE	FALSE	FALSE	FALSE		FALSE	TRUE	TN			FALSE	FALSE	TRUE	TN		FALSE	TRUE	TN			FALSE	TRUE	TN		TRUE	FALSE	FP
695	GCF_013201075.1_ASM1320107v1_genomic_NZ_CP053708.1.region007.gbk	GCF_013201075.1	Lichenicola cladoniae	negative	G	95		FALSE	FALSE	FALSE	FALSE		FALSE	TRUE	TN			FALSE	FALSE	TRUE	TN		FALSE	TRUE	TN			FALSE	TRUE	TN		FALSE	TRUE	TN
696	GCF_013265585.1_ASM1326558v1_genomic_NZ_CP048104.1.region002.gbk	GCF_013265585.1	Kroppenstedtia pulmonis	positive	G	96		FALSE	FALSE	FALSE	FALSE		FALSE	TRUE	TN			FALSE	FALSE	TRUE	TN		FALSE	TRUE	TN			FALSE	TRUE	TN		FALSE	TRUE	TN
697	GCF_013265585.1_ASM1326558v1_genomic_NZ_CP048104.1.region004.gbk	GCF_013265585.1	Kroppenstedtia pulmonis	positive	G	97		FALSE	FALSE	FALSE	FALSE		FALSE	TRUE	TN			FALSE	FALSE	TRUE	TN		FALSE	TRUE	TN			FALSE	TRUE	TN		FALSE	TRUE	TN
698	GCF_013265585.1_ASM1326558v1_genomic_NZ_CP048104.1.region006.gbk	GCF_013265585.1	Kroppenstedtia pulmonis	positive	G	98		FALSE	FALSE	FALSE	FALSE		FALSE	TRUE	TN			FALSE	FALSE	TRUE	TN		FALSE	TRUE	TN			FALSE	TRUE	TN		FALSE	TRUE	TN
699	GCF_013265585.1_ASM1326558v1_genomic_NZ_CP048104.1.region007.gbk	GCF_013265585.1	Kroppenstedtia pulmonis	positive	G	99		FALSE	FALSE	FALSE	FALSE		FALSE	TRUE	TN			FALSE	FALSE	TRUE	TN		FALSE	TRUE	TN			FALSE	TRUE	TN		FALSE	TRUE	TN
700	GCF_013265585.1_ASM1326558v1_genomic_NZ_CP048104.1.region008.gbk	GCF_013265585.1	Kroppenstedtia pulmonis	positive	G	100		FALSE	FALSE	FALSE	FALSE		FALSE	TRUE	TN			FALSE	FALSE	TRUE	TN		FALSE	TRUE	TN			FALSE	TRUE	TN		FALSE	TRUE	TN
701	GCF_013283875.1_ASM1328387v1_genomic_NZ_CP054139.1.region007.gbk	GCF_013283875.1	Mucilaginibacter mali	negative	H	1		FALSE	FALSE	FALSE	FALSE		FALSE	TRUE	TN			FALSE	FALSE	TRUE	TN		FALSE	TRUE	TN			FALSE	TRUE	TN		FALSE	TRUE	TN
702	GCF_013394675.1_ASM1339467v1_genomic_NZ_CP053352.1.region002.gbk	GCF_013394675.1	Winogradskyella helgolandensis	negative	H	2		FALSE	FALSE	FALSE	FALSE		FALSE	TRUE	TN			FALSE	FALSE	TRUE	TN		FALSE	TRUE	TN			FALSE	TRUE	TN		TRUE	FALSE	FP
703	GCF_013488225.1_ASM1348822v1_genomic_NZ_CP041240.1.region001.gbk	GCF_013488225.1	Ensifer mexicanus	negative	H	3		FALSE	FALSE	FALSE	FALSE		FALSE	TRUE	TN			FALSE	FALSE	TRUE	TN		FALSE	TRUE	TN			FALSE	TRUE	TN		FALSE	TRUE	TN
704	GCF_013744875.1_ASM1374487v1_genomic_NZ_CP059399.1.region003.gbk	GCF_013744875.1	Nocardia huaxiensis	positive	H	4		TRUE	TRUE	FALSE	FALSE		TRUE	TRUE	TP			TRUE	TRUE	TRUE	TP		FALSE	FALSE	FN			TRUE	TRUE	TP		FALSE	FALSE	FN
705	GCF_013744875.1_ASM1374487v1_genomic_NZ_CP059399.1.region004.gbk	GCF_013744875.1	Nocardia huaxiensis	positive	H	5		FALSE	FALSE	FALSE	FALSE		FALSE	TRUE	TN			FALSE	FALSE	TRUE	TN		FALSE	TRUE	TN			FALSE	TRUE	TN		FALSE	TRUE	TN
706	GCF_013744875.1_ASM1374487v1_genomic_NZ_CP059399.1.region005.gbk	GCF_013744875.1	Nocardia huaxiensis	positive	H	6		TRUE	TRUE	FALSE	FALSE		TRUE	TRUE	TP			TRUE	TRUE	TRUE	TP		FALSE	FALSE	FN			TRUE	TRUE	TP		FALSE	FALSE	FN
707	GCF_013744875.1_ASM1374487v1_genomic_NZ_CP059399.1.region008.gbk	GCF_013744875.1	Nocardia huaxiensis	positive	H	7		FALSE	FALSE	FALSE	FALSE		FALSE	TRUE	TN			FALSE	FALSE	TRUE	TN		FALSE	TRUE	TN			FALSE	TRUE	TN		FALSE	TRUE	TN
708	GCF_013744875.1_ASM1374487v1_genomic_NZ_CP059399.1.region012.gbk	GCF_013744875.1	Nocardia huaxiensis	positive	H	8		TRUE	TRUE	TRUE	FALSE		TRUE	TRUE	TP			TRUE	TRUE	TRUE	TP		TRUE	TRUE	TP			TRUE	TRUE	TP		FALSE	FALSE	FN
709	GCF_013744875.1_ASM1374487v1_genomic_NZ_CP059399.1.region013.gbk	GCF_013744875.1	Nocardia huaxiensis	positive	H	9		FALSE	FALSE	FALSE	FALSE		FALSE	TRUE	TN			FALSE	FALSE	TRUE	TN		FALSE	TRUE	TN			FALSE	TRUE	TN		FALSE	TRUE	TN
710	GCF_013744875.1_ASM1374487v1_genomic_NZ_CP059399.1.region014.gbk	GCF_013744875.1	Nocardia huaxiensis	positive	H	10		FALSE	FALSE	FALSE	FALSE		FALSE	TRUE	TN			FALSE	FALSE	TRUE	TN		FALSE	TRUE	TN			FALSE	TRUE	TN		FALSE	TRUE	TN
711	GCF_013744875.1_ASM1374487v1_genomic_NZ_CP059399.1.region015.gbk	GCF_013744875.1	Nocardia huaxiensis	positive	H	11		TRUE	TRUE	FALSE	FALSE		TRUE	TRUE	TP			TRUE	TRUE	TRUE	TP		FALSE	FALSE	FN			TRUE	TRUE	TP		FALSE	FALSE	FN
712	GCF_013744875.1_ASM1374487v1_genomic_NZ_CP059399.1.region019.gbk	GCF_013744875.1	Nocardia huaxiensis	positive	H	12		FALSE	FALSE	FALSE	FALSE		FALSE	TRUE	TN			FALSE	FALSE	TRUE	TN		FALSE	TRUE	TN			FALSE	TRUE	TN		FALSE	TRUE	TN
713	GCF_013744875.1_ASM1374487v1_genomic_NZ_CP059399.1.region021.gbk	GCF_013744875.1	Nocardia huaxiensis	positive	H	13		FALSE	FALSE	FALSE	FALSE		FALSE	TRUE	TN			FALSE	FALSE	TRUE	TN		FALSE	TRUE	TN			FALSE	TRUE	TN		FALSE	TRUE	TN
714	GCF_013744875.1_ASM1374487v1_genomic_NZ_CP059399.1.region022.gbk	GCF_013744875.1	Nocardia huaxiensis	positive	H	14		FALSE	FALSE	FALSE	FALSE		FALSE	TRUE	TN			FALSE	FALSE	TRUE	TN		FALSE	TRUE	TN			FALSE	TRUE	TN		FALSE	TRUE	TN
715	GCF_013744875.1_ASM1374487v1_genomic_NZ_CP059399.1.region025.gbk	GCF_013744875.1	Nocardia huaxiensis	positive	H	15		FALSE	FALSE	FALSE	FALSE		FALSE	TRUE	TN			FALSE	FALSE	TRUE	TN		FALSE	TRUE	TN			FALSE	TRUE	TN		FALSE	TRUE	TN
716	GCF_013744875.1_ASM1374487v1_genomic_NZ_CP059399.1.region028.gbk	GCF_013744875.1	Nocardia huaxiensis	positive	H	16		FALSE	FALSE	FALSE	FALSE		FALSE	TRUE	TN			FALSE	FALSE	TRUE	TN		FALSE	TRUE	TN			FALSE	TRUE	TN		FALSE	TRUE	TN
717	GCF_014107495.1_ASM1410749v1_genomic_NZ_CP041969.1.region001.gbk	GCF_014107495.1	Cohnella cholangitidis	positive	H	17		FALSE	FALSE	FALSE	FALSE		FALSE	TRUE	TN			FALSE	FALSE	TRUE	TN		FALSE	TRUE	TN			FALSE	TRUE	TN		FALSE	TRUE	TN
718	GCF_014107495.1_ASM1410749v1_genomic_NZ_CP041969.1.region008.gbk	GCF_014107495.1	Cohnella cholangitidis	positive	H	18		FALSE	FALSE	FALSE	FALSE		FALSE	TRUE	TN			FALSE	FALSE	TRUE	TN		FALSE	TRUE	TN			FALSE	TRUE	TN		FALSE	TRUE	TN
719	GCF_014126615.1_ASM1412661v1_genomic_NZ_CP059897.1.region003.gbk	GCF_014126615.1	Ciceribacter thiooxidans	negative	H	19		TRUE	TRUE	TRUE	FALSE		TRUE	TRUE	TP			TRUE	TRUE	TRUE	TP		TRUE	TRUE	TP			TRUE	TRUE	TP		TRUE	TRUE	TP
720	GCF_014126825.1_ASM1412682v1_genomic_NZ_CP059900.1.region002.gbk	GCF_014126825.1	Tomitella gaofuii	positive	H	20		FALSE	FALSE	FALSE	FALSE		FALSE	TRUE	TN			FALSE	FALSE	TRUE	TN		FALSE	TRUE	TN			FALSE	TRUE	TN		FALSE	TRUE	TN
721	GCF_014126825.1_ASM1412682v1_genomic_NZ_CP059900.1.region008.gbk	GCF_014126825.1	Tomitella gaofuii	positive	H	21		TRUE	TRUE	TRUE	TRUE		TRUE	TRUE	TP			TRUE	TRUE	TRUE	TP		TRUE	TRUE	TP			TRUE	TRUE	TP		FALSE	FALSE	FN
722	GCF_014189455.1_ASM1418945v1_genomic_NZ_CP050297.1.region001.gbk	GCF_014189455.1	Mesorhizobium huakuii	negative	H	22		FALSE	FALSE	FALSE	FALSE		FALSE	TRUE	TN			FALSE	FALSE	TRUE	TN		FALSE	TRUE	TN			FALSE	TRUE	TN		FALSE	TRUE	TN
723	GCF_014189455.1_ASM1418945v1_genomic_NZ_CP050297.1.region002.gbk	GCF_014189455.1	Mesorhizobium huakuii	negative	H	23		FALSE	FALSE	FALSE	FALSE		FALSE	TRUE	TN			FALSE	FALSE	TRUE	TN		FALSE	TRUE	TN			FALSE	TRUE	TN		FALSE	TRUE	TN
724	GCF_014211975.1_ASM1421197v1_genomic_NZ_CP060084.1.region002.gbk	GCF_014211975.1	Teredinibacter haidensis	negative	H	24		FALSE	FALSE	FALSE	FALSE		FALSE	TRUE	TN			FALSE	FALSE	TRUE	TN		FALSE	TRUE	TN			FALSE	TRUE	TN		TRUE	FALSE	FP
725	GCF_014211975.1_ASM1421197v1_genomic_NZ_CP060084.1.region003.gbk	GCF_014211975.1	Teredinibacter haidensis	negative	H	25		TRUE	TRUE	TRUE	TRUE		TRUE	TRUE	TP			TRUE	TRUE	TRUE	TP		FALSE	FALSE	FN			TRUE	TRUE	TP		TRUE	TRUE	TP
726	GCF_014211975.1_ASM1421197v1_genomic_NZ_CP060084.1.region005.gbk	GCF_014211975.1	Teredinibacter haidensis	negative	H	26		FALSE	FALSE	FALSE	FALSE		FALSE	TRUE	TN			FALSE	FALSE	TRUE	TN		FALSE	TRUE	TN			FALSE	TRUE	TN		FALSE	TRUE	TN
727	GCF_014218335.1_ASM1421833v1_genomic_NZ_AP023367.1.region003.gbk	GCF_014218335.1	Anaerocolumna cellulosilytica	positive	H	27		FALSE	FALSE	FALSE	FALSE		FALSE	TRUE	TN			FALSE	FALSE	TRUE	TN		FALSE	TRUE	TN			FALSE	TRUE	TN		FALSE	TRUE	TN
728	GCF_014218335.1_ASM1421833v1_genomic_NZ_AP023367.1.region007.gbk	GCF_014218335.1	Anaerocolumna cellulosilytica	positive	H	28		FALSE	FALSE	FALSE	FALSE		FALSE	TRUE	TN			FALSE	FALSE	TRUE	TN		FALSE	TRUE	TN			FALSE	TRUE	TN		FALSE	TRUE	TN
729	GCF_014218335.1_ASM1421833v1_genomic_NZ_AP023367.1.region011.gbk	GCF_014218335.1	Anaerocolumna cellulosilytica	positive	H	29		FALSE	FALSE	FALSE	FALSE		FALSE	TRUE	TN			FALSE	FALSE	TRUE	TN		FALSE	TRUE	TN			FALSE	TRUE	TN		FALSE	TRUE	TN
730	GCF_014236795.1_ASM1423679v1_genomic_NZ_CP049017.1.region005.gbk	GCF_014236795.1	Xanthomonas theicola	negative	H	30		FALSE	FALSE	FALSE	FALSE		TRUE	FALSE	FP	questionable hits	questionable orn_monoox	FALSE	TRUE	FALSE	FP		FALSE	TRUE	TN			TRUE	FALSE	FP		TRUE	FALSE	FP
731	GCF_014297575.1_ASM1429757v1_genomic_NZ_CP060412.1.region001.gbk	GCF_014297575.1	Dyella telluris	negative	H	31		FALSE	FALSE	FALSE	FALSE		FALSE	TRUE	TN			FALSE	FALSE	TRUE	TN		FALSE	TRUE	TN			FALSE	TRUE	TN		TRUE	FALSE	FP
732	GCF_014489415.1_ASM1448941v1_genomic_NZ_CP060822.1.region009.gbk	GCF_014489415.1	Cylindrospermopsis curvispora GIHE-G1	#N/A	H	32		FALSE	FALSE	FALSE	FALSE		FALSE	TRUE	TN			FALSE	FALSE	TRUE	TN		FALSE	TRUE	TN			FALSE	TRUE	TN		FALSE	TRUE	TN
733	GCF_900070355.1_S2_rcS3_S1_rcS3_genomic_NZ_LN849456.1.region002.gbk	GCF_900070355.1	Devriesea agamarum	positive	H	33		TRUE	TRUE	TRUE	TRUE		TRUE	TRUE	TP			TRUE	TRUE	TRUE	TP		TRUE	TRUE	TP			TRUE	TRUE	TP		FALSE	FALSE	FN
734	GCF_900089455.2_OrrDiv2_genomic_NZ_LT907988.1.region002.gbk	GCF_900089455.2	Orrella dioscoreae	negative	H	34		FALSE	FALSE	FALSE	FALSE		FALSE	TRUE	TN			FALSE	FALSE	TRUE	TN		FALSE	TRUE	TN			FALSE	TRUE	TN		FALSE	TRUE	TN
735	GCF_900120165.1_PRJEB15652_genomic_NZ_LT635475.1.region002.gbk	GCF_900120165.1	Ezakiella massiliensis	#N/A	H	35		FALSE	FALSE	FALSE	FALSE	could be a fragment	FALSE	TRUE	TN			FALSE	FALSE	TRUE	TN		FALSE	TRUE	TN			FALSE	TRUE	TN		FALSE	TRUE	TN
736	GCF_900169565.1_NSJP_Ch1_genomic_NZ_LT828648.1.region012.gbk	GCF_900169565.1	Nitrospira japonica	negative	H	36		FALSE	FALSE	FALSE	FALSE		FALSE	TRUE	TN			FALSE	FALSE	TRUE	TN		FALSE	TRUE	TN			FALSE	TRUE	TN		FALSE	TRUE	TN
737	GCF_900169565.1_NSJP_Ch1_genomic_NZ_LT828648.1.region013.gbk	GCF_900169565.1	Nitrospira japonica	negative	H	37		FALSE	FALSE	FALSE	FALSE		FALSE	TRUE	TN			FALSE	FALSE	TRUE	TN		FALSE	TRUE	TN			FALSE	TRUE	TN		FALSE	TRUE	TN
738	GCF_900169565.1_NSJP_Ch1_genomic_NZ_LT828648.1.region014.gbk	GCF_900169565.1	Nitrospira japonica	negative	H	38		TRUE	TRUE	TRUE	FALSE		TRUE	TRUE	TP			TRUE	TRUE	TRUE	TP		FALSE	FALSE	FN			TRUE	TRUE	TP		TRUE	TRUE	TP
739	GCF_900187045.1_51485_B01_genomic_NZ_LT906453.1.region001.gbk	GCF_900187045.1	Dermatophilus congolensis	positive	H	39		TRUE	TRUE	TRUE	TRUE		TRUE	TRUE	TP			TRUE	TRUE	TRUE	TP		TRUE	TRUE	TP			TRUE	TRUE	TP		FALSE	FALSE	FN
740	GCF_900187045.1_51485_B01_genomic_NZ_LT906453.1.region005.gbk	GCF_900187045.1	Dermatophilus congolensis	positive	H	40		TRUE	FALSE	TRUE	FALSE	cysteines and abc	FALSE	FALSE	FN	novel synth	novel biosynthesis?	TRUE	FALSE	FALSE	FN		FALSE	FALSE	FN			FALSE	FALSE	FN		FALSE	FALSE	FN
741	GCF_900231165.1_HDIA1_genomic_NZ_LT960614.1.region005.gbk	GCF_900231165.1	Hartmannibacter diazotrophicus	#N/A	H	41		TRUE	TRUE	TRUE	FALSE		TRUE	TRUE	TP			TRUE	TRUE	TRUE	TP		TRUE	TRUE	TP			TRUE	TRUE	TP		TRUE	TRUE	TP
742	GCF_900465055.1_MORIYA_PRJEB24680v2_genomic_NZ_LS483250.1.region001.gbk	GCF_900465055.1	Moritella yayanosii	negative	H	42		TRUE	TRUE	TRUE	FALSE		TRUE	TRUE	TP			TRUE	TRUE	TRUE	TP		TRUE	TRUE	TP			TRUE	TRUE	TP		TRUE	TRUE	TP
743	GCF_900564155.1_PRJEB26455_genomic_NZ_LS999839.1.region002.gbk	GCF_900564155.1	Pedobacter schmidteae	negative	H	43		FALSE	FALSE	FALSE	FALSE		FALSE	TRUE	TN			FALSE	FALSE	TRUE	TN		FALSE	TRUE	TN			FALSE	TRUE	TN		FALSE	TRUE	TN
744	GCF_900637055.1_46837_E02_genomic_NZ_LR134338.1.region001.gbk	GCF_900637055.1	Brevibacillus brevis	positive	H	44		FALSE	FALSE	FALSE	FALSE		FALSE	TRUE	TN			FALSE	FALSE	TRUE	TN		FALSE	TRUE	TN			FALSE	TRUE	TN		FALSE	TRUE	TN
745	GCF_900637055.1_46837_E02_genomic_NZ_LR134338.1.region002.gbk	GCF_900637055.1	Brevibacillus brevis	positive	H	45		TRUE	TRUE	FALSE	FALSE		TRUE	TRUE	TP			TRUE	TRUE	TRUE	TP		FALSE	FALSE	FN			TRUE	TRUE	TP		FALSE	FALSE	FN
746	GCF_900637055.1_46837_E02_genomic_NZ_LR134338.1.region004.gbk	GCF_900637055.1	Brevibacillus brevis	positive	H	46		FALSE	FALSE	FALSE	FALSE		FALSE	TRUE	TN			FALSE	FALSE	TRUE	TN		FALSE	TRUE	TN			FALSE	TRUE	TN		FALSE	TRUE	TN
747	GCF_900637055.1_46837_E02_genomic_NZ_LR134338.1.region007.gbk	GCF_900637055.1	Brevibacillus brevis	positive	H	47		FALSE	FALSE	FALSE	FALSE		FALSE	TRUE	TN			FALSE	FALSE	TRUE	TN		FALSE	TRUE	TN			FALSE	TRUE	TN		FALSE	TRUE	TN
748	GCF_900637055.1_46837_E02_genomic_NZ_LR134338.1.region008.gbk	GCF_900637055.1	Brevibacillus brevis	positive	H	48		FALSE	FALSE	FALSE	FALSE		FALSE	TRUE	TN			FALSE	FALSE	TRUE	TN		FALSE	TRUE	TN			FALSE	TRUE	TN		FALSE	TRUE	TN
749	GCF_900637055.1_46837_E02_genomic_NZ_LR134338.1.region009.gbk	GCF_900637055.1	Brevibacillus brevis	positive	H	49		FALSE	FALSE	FALSE	FALSE		FALSE	TRUE	TN			FALSE	FALSE	TRUE	TN		FALSE	TRUE	TN			FALSE	TRUE	TN		FALSE	TRUE	TN
750	GCF_900637055.1_46837_E02_genomic_NZ_LR134338.1.region011.gbk	GCF_900637055.1	Brevibacillus brevis	positive	H	50		FALSE	FALSE	FALSE	FALSE		FALSE	TRUE	TN			FALSE	FALSE	TRUE	TN		FALSE	TRUE	TN			FALSE	TRUE	TN		FALSE	TRUE	TN
751	GCF_900637055.1_46837_E02_genomic_NZ_LR134338.1.region013.gbk	GCF_900637055.1	Brevibacillus brevis	positive	H	51		FALSE	FALSE	FALSE	FALSE		FALSE	TRUE	TN			FALSE	FALSE	TRUE	TN		FALSE	TRUE	TN			FALSE	TRUE	TN		FALSE	TRUE	TN
752	GCF_900637545.1_51438_G01_genomic_NZ_LR134376.1.region003.gbk	GCF_900637545.1	Aeromonas encheleia	negative	H	52		TRUE	TRUE	TRUE	FALSE		TRUE	TRUE	TP			TRUE	TRUE	TRUE	TP		TRUE	TRUE	TP			TRUE	TRUE	TP		TRUE	TRUE	TP
753	GCF_900637555.1_51726_E01_genomic_NZ_LR134378.1.region002.gbk	GCF_900637555.1	Lautropia mirabilis	negative	H	53		TRUE	TRUE	TRUE	FALSE		FALSE	FALSE	FN	genes elsewhere	dhb elsewhere	TRUE	FALSE	FALSE	FN		TRUE	TRUE	TP			TRUE	TRUE	TP		FALSE	FALSE	FN
754	GCF_900637725.1_52551_C01_genomic_NZ_LR134406.1.region004.gbk	GCF_900637725.1	Arachnia propionica	positive	H	54		TRUE	TRUE	TRUE	FALSE		FALSE	FALSE	FN	genes missing	dhb missing	TRUE	FALSE	FALSE	FN		FALSE	FALSE	FN			FALSE	FALSE	FN		FALSE	FALSE	FN
755	GCF_900660745.1_57728_G01-3_genomic_NZ_LR215048.1.region001.gbk	GCF_900660745.1	Haploplasma axanthum	#N/A	H	55		FALSE	FALSE	FALSE	FALSE		FALSE	TRUE	TN			FALSE	FALSE	TRUE	TN		FALSE	TRUE	TN			FALSE	TRUE	TN		FALSE	TRUE	TN
756	GCF_901482605.1_45532_E01_genomic_NZ_LR590481.1.region005.gbk	GCF_901482605.1	Hathewaya histolytica	positive	H	56		FALSE	FALSE	FALSE	FALSE		FALSE	TRUE	TN			FALSE	FALSE	TRUE	TN		FALSE	TRUE	TN			FALSE	TRUE	TN		FALSE	TRUE	TN
757	GCF_902459485.1_pb_189-2_HGAP3_CTR_genomic_NZ_LR699119.1.region004.gbk	GCF_902459485.1	Aquicella siphonis	negative	H	57		FALSE	FALSE	FALSE	FALSE		FALSE	TRUE	TN			FALSE	FALSE	TRUE	TN		FALSE	TRUE	TN			FALSE	TRUE	TN		FALSE	TRUE	TN
758	GCF_902459535.1_Paraburkholderia_sp_Msb3_genomic_NZ_LR699554.1.region005.gbk	GCF_902459535.1	Paraburkholderia dioscoreae	negative	H	58		TRUE	TRUE	TRUE	TRUE		TRUE	TRUE	TP			TRUE	TRUE	TRUE	TP		TRUE	TRUE	TP			TRUE	TRUE	TP		TRUE	TRUE	TP

## Sheet: 1c - Refseq Reps Jun25
Assembly	Accesion	Region	NRPS	NRP-metallophore	NIS	Metallophore	Span	ContigEdge	Taxonomy	Species	Orn_monoox	IBH_Asp	EntC	EntA	Lys_monoox	SalSyn	IPL	Cy_tandem	VibH_like	TBH_Asp	PvdO	PvdP	IBH_His	KtzT	MetRS-like	VbsL	FbnL	FbnM	SBH_Asp	GrbD	GrbE	CyanoBH_Asp1	CyanoBH_Asp2		TonB_dep_Rec	Peripla_BP_2	FecCD	TRANSPORT
GCF_017498545.1	NZ_CP071793.1	region028	TRUE	TRUE	FALSE	TRUE	8000053..8102702	FALSE	Bacteria_Acidobacteria_Holophagae_Acanthopleuribacterales_Acanthopleuribacteraceae_Sulfidibacter	Sulfidibacter corallicola										427.8																		FALSE
GCF_003606385.1	NZ_CP032514.1	region004	TRUE	TRUE	FALSE	TRUE	2526704..2584604	FALSE	Bacteria_Actinobacteria_Actinomycetales_Actinomycetaceae_Actinomyces	Actinomyces lilanjuaniae			301.5	223.9																						53.7	244.2	TRUE
GCF_004010955.1	NZ_CP025227.1	region007	TRUE	TRUE	FALSE	TRUE	2570567..2629912	FALSE	Bacteria_Actinobacteria_Actinomycetales_Actinomycetaceae_Actinomyces	Actinomyces wuliandei			305.4	223.4																						54.6	240.6	TRUE
GCF_018139695.1	NZ_JAGSOG010000080.1	region001	TRUE	TRUE	FALSE	TRUE	0..33064	TRUE	Bacteria_Actinobacteria_Catenulisporales_Actinospicaceae_Actinospica	Actinospica durhamensis						523.8																						FALSE
GCF_000006605.1	NC_007164.1	region005	TRUE	TRUE	FALSE	TRUE	2048677..2147160	FALSE	Bacteria_Actinobacteria_Corynebacteriales_Corynebacteriaceae_Corynebacterium	Corynebacterium jeikeium K411	443.6		384.6	255.3	455.3																					101.3	309.2	TRUE
GCF_000023145.1	NC_012704.1	region003	TRUE	TRUE	FALSE	TRUE	2101817..2153966	FALSE	Bacteria_Actinobacteria_Corynebacteriales_Corynebacteriaceae_Corynebacterium	Corynebacterium kroppenstedtii DSM 44385				293.4	421.7																					73.9		FALSE
GCF_000175375.1	NZ_ACSH02000002.1	region002	TRUE	TRUE	FALSE	TRUE	309081..358580	FALSE	Bacteria_Actinobacteria_Corynebacteriales_Corynebacteriaceae_Corynebacterium	Corynebacterium matruchotii ATCC 14266			384.9	264.9																						85.7	289.6	TRUE
GCF_000318135.1	NZ_KB290820.1	region001	TRUE	TRUE	FALSE	TRUE	124267..196851	FALSE	Bacteria_Actinobacteria_Corynebacteriales_Corynebacteriaceae_Corynebacterium	Corynebacterium durum F0235	477																									88.8		FALSE
GCF_000375365.1	NZ_AQXB01000002.1	region002	TRUE	TRUE	FALSE	TRUE	299333..347275	FALSE	Bacteria_Actinobacteria_Corynebacteriales_Corynebacteriaceae_Corynebacterium	Corynebacterium mastitidis DSM 44356					440.3																					78.3	294.9	TRUE
GCF_000418365.1	NC_021663.1	region005	TRUE	TRUE	FALSE	TRUE	2218132..2268070	FALSE	Bacteria_Actinobacteria_Corynebacteriales_Corynebacteriaceae_Corynebacterium	Corynebacterium terpenotabidum Y-11					542.6																						309.8	FALSE
GCF_000626675.1	NZ_CP006842.1	region003	TRUE	TRUE	FALSE	TRUE	737662..804752	FALSE	Bacteria_Actinobacteria_Corynebacteriales_Corynebacteriaceae_Corynebacterium	Corynebacterium glyciniphilum AJ 3170			368.2	274.7	519.9																						303.2	FALSE
GCF_001274895.1	NZ_CP006841.1	region001	TRUE	TRUE	FALSE	TRUE	389160..442201	FALSE	Bacteria_Actinobacteria_Corynebacteriales_Corynebacteriaceae_Corynebacterium	Corynebacterium lactis RW2-5	440.8																									99.5	300.9	TRUE
GCF_001412085.1	NZ_LKEV01000008.1	region001	TRUE	TRUE	FALSE	TRUE	17836..65671	FALSE	Bacteria_Actinobacteria_Corynebacteriales_Corynebacteriaceae_Corynebacterium	Corynebacterium lowii					440.4																					85.7	291.3	TRUE
GCF_001412105.1	NZ_LKST01000004.1	region001	TRUE	TRUE	FALSE	TRUE	13566..61449	FALSE	Bacteria_Actinobacteria_Corynebacteriales_Corynebacteriaceae_Corynebacterium	Corynebacterium oculi					443.6																					78.8	296.8	TRUE
GCF_001941505.1	NZ_CP009248.1	region001	TRUE	TRUE	FALSE	TRUE	324802..385829	FALSE	Bacteria_Actinobacteria_Corynebacteriales_Corynebacteriaceae_Corynebacterium	Corynebacterium sphenisci DSM 44792			399.1	225.9	432.8																					67.9	279.1	TRUE
GCF_001941565.1	NZ_CP009249.1	region003	TRUE	TRUE	FALSE	TRUE	2432270..2482076	FALSE	Bacteria_Actinobacteria_Corynebacteriales_Corynebacteriaceae_Corynebacterium	Corynebacterium phocae			385.1	260.9																								FALSE
GCF_003065405.1	NZ_CP026947.1	region001	TRUE	TRUE	FALSE	TRUE	378398..431045	FALSE	Bacteria_Actinobacteria_Corynebacteriales_Corynebacteriaceae_Corynebacterium	Corynebacterium yudongzhengii					331.5																					72.2	263.7	TRUE
GCF_003813985.1	NZ_CP033897.1	region002	TRUE	TRUE	FALSE	TRUE	1905672..1955672	FALSE	Bacteria_Actinobacteria_Corynebacteriales_Corynebacteriaceae_Corynebacterium	Corynebacterium gerontici			320.4	244.4																						88.1	275.5	TRUE
GCF_003814005.1	NZ_CP033898.1	region002	TRUE	TRUE	FALSE	TRUE	1990432..2040504	FALSE	Bacteria_Actinobacteria_Corynebacteriales_Corynebacteriaceae_Corynebacterium	Corynebacterium pseudopelargi			345.5	261.9																						72.1	269.3	TRUE
GCF_003932295.1	NZ_PQNX01000006.1	region002	TRUE	TRUE	FALSE	TRUE	45102..115223	FALSE	Bacteria_Actinobacteria_Corynebacteriales_Corynebacteriaceae_Corynebacterium	Corynebacterium bovis						477.7																				93.5		FALSE
GCF_004114895.1	NZ_CP035299.1	region002	TRUE	TRUE	FALSE	TRUE	2008247..2058319	FALSE	Bacteria_Actinobacteria_Corynebacteriales_Corynebacteriaceae_Corynebacterium	Corynebacterium pelargi			347.5	261.9																						67.5	269	TRUE
GCF_006539825.1	NZ_BJNT01000013.1	region001	TRUE	TRUE	FALSE	TRUE	1738..51969	FALSE	Bacteria_Actinobacteria_Corynebacteriales_Corynebacteriaceae_Corynebacterium	Corynebacterium variabile					544.7																						313	FALSE
GCF_007859215.1	NZ_VOHM01000006.1	region001	TRUE	TRUE	FALSE	TRUE	96800..145717	TRUE	Bacteria_Actinobacteria_Corynebacteriales_Corynebacteriaceae_Corynebacterium	Corynebacterium canis					439.5																					56		FALSE
GCF_007859215.1	NZ_VOHM01000018.1	region001	TRUE	TRUE	FALSE	TRUE	0..27860	TRUE	Bacteria_Actinobacteria_Corynebacteriales_Corynebacteriaceae_Corynebacterium	Corynebacterium canis	495.7																											FALSE
GCF_016728105.1	NZ_CP068158.1	region002	TRUE	TRUE	FALSE	TRUE	1454849..1507225	FALSE	Bacteria_Actinobacteria_Corynebacteriales_Corynebacteriaceae_Corynebacterium	Corynebacterium striatum	443.6																									101.3	299.8	TRUE
GCF_016728665.1	NZ_CP068161.1	region005	TRUE	TRUE	FALSE	TRUE	1514300..1573054	FALSE	Bacteria_Actinobacteria_Corynebacteriales_Corynebacteriaceae_Corynebacterium	Corynebacterium propinquum			390.2	239.6																						71.5	286.1	TRUE
GCF_017876455.1	NZ_JAGINY010000001.1	region004	TRUE	TRUE	FALSE	TRUE	1753839..1818412	FALSE	Bacteria_Actinobacteria_Corynebacteriales_Corynebacteriaceae_Corynebacterium	Corynebacterium freneyi			411.5		558.1																					76.9	288.7	TRUE
GCF_017876455.1	NZ_JAGINY010000001.1	region005	TRUE	TRUE	FALSE	TRUE	2535945..2607351	FALSE	Bacteria_Actinobacteria_Corynebacteriales_Corynebacteriaceae_Corynebacterium	Corynebacterium freneyi					381																					44.4	257.7	TRUE
GCF_020616335.1	NZ_CP085051.1	region001	TRUE	TRUE	FALSE	TRUE	383057..442167	FALSE	Bacteria_Actinobacteria_Corynebacteriales_Corynebacteriaceae_Corynebacterium	Corynebacterium uberis			396.6	261.6																						48.9	319.3	TRUE
GCF_021568315.1	NZ_JAKGSI010000004.1	region003	TRUE	TRUE	FALSE	TRUE	284075..374552	FALSE	Bacteria_Actinobacteria_Corynebacteriales_Corynebacteriaceae_Corynebacterium	Corynebacterium uropygiale			367.8	263.7																						78.8	283.2	TRUE
GCF_021713135.1	NZ_JAKJKO010000001.1	region003	TRUE	TRUE	FALSE	TRUE	1040423..1092502	FALSE	Bacteria_Actinobacteria_Corynebacteriales_Corynebacteriaceae_Corynebacterium	Corynebacterium parakroppenstedtii				293	412.4																					68.9		FALSE
GCF_900187235.1	NZ_LT906481.1	region006	TRUE	TRUE	FALSE	TRUE	2067986..2120362	FALSE	Bacteria_Actinobacteria_Corynebacteriales_Corynebacteriaceae_Corynebacterium	Corynebacterium urealyticum	443.9																									101.3	299.8	TRUE
GCF_900232865.1	NZ_OCTS01000002.1	region001	TRUE	TRUE	FALSE	TRUE	234181..301661	FALSE	Bacteria_Actinobacteria_Corynebacteriales_Corynebacteriaceae_Corynebacterium	Corynebacterium dentalis	444.3																									101.3	299.6	TRUE
GCF_900626215.1	NZ_LR131106.1	region001	TRUE	TRUE	FALSE	TRUE	526908..597397	FALSE	Bacteria_Actinobacteria_Corynebacteriales_Corynebacteriaceae_Corynebacterium	Corynebacterium neomassiliense	480.2		362.4																							56.8		FALSE
GCF_900626215.1	NZ_LR131106.1	region003	TRUE	TRUE	FALSE	TRUE	1353838..1404767	FALSE	Bacteria_Actinobacteria_Corynebacteriales_Corynebacteriaceae_Corynebacterium	Corynebacterium neomassiliense					533																						308.2	FALSE
GCF_022012575.1	NZ_JAKLTK010000001.1	region002	TRUE	TRUE	FALSE	TRUE	405709..457888	FALSE	Bacteria_Actinobacteria_Corynebacteriales_Corynebacteriaceae_Corynebacterium_unclassified Corynebacterium	Corynebacterium sp. MC-03				297.3	457																					73.4		FALSE
GCF_000024785.1	NC_013441.1	region002	TRUE	TRUE	FALSE	TRUE	639237..725437	FALSE	Bacteria_Actinobacteria_Corynebacteriales_Gordoniaceae_Gordonia	Gordonia bronchialis DSM 43247					683.8	517.2																				63.3	295.5	TRUE
GCF_000192435.1	NZ_AEUD01000008.1	region001	TRUE	TRUE	FALSE	TRUE	0..43165	TRUE	Bacteria_Actinobacteria_Corynebacteriales_Gordoniaceae_Gordonia	Gordonia neofelifaecis NRRL B-59395					634.9	516.8																						FALSE
GCF_000241265.1	NZ_BAEE01000004.1	region001	TRUE	TRUE	TRUE	TRUE	3945..47224	TRUE	Bacteria_Actinobacteria_Corynebacteriales_Gordoniaceae_Gordonia	Gordonia araii NBRC 100433						530.3																						FALSE
GCF_000241305.1	NZ_BAEH01000036.1	region001	TRUE	TRUE	FALSE	TRUE	25163..94404	FALSE	Bacteria_Actinobacteria_Corynebacteriales_Gordoniaceae_Gordonia	Gordonia effusa NBRC 100432					729.1	525.6																						FALSE
GCF_000241305.1	NZ_BAEH01000120.1	region001	TRUE	TRUE	FALSE	TRUE	34252..84121	TRUE	Bacteria_Actinobacteria_Corynebacteriales_Gordoniaceae_Gordonia	Gordonia effusa NBRC 100432	527.3																											FALSE
GCF_000247715.1	NC_016906.1	region004	TRUE	TRUE	FALSE	TRUE	720206..777930	FALSE	Bacteria_Actinobacteria_Corynebacteriales_Gordoniaceae_Gordonia	Gordonia polyisoprenivorans VH2	435																									100.1	275.4	TRUE
GCF_000247715.1	NC_016906.1	region009	TRUE	TRUE	FALSE	TRUE	2646641..2720102	FALSE	Bacteria_Actinobacteria_Corynebacteriales_Gordoniaceae_Gordonia	Gordonia polyisoprenivorans VH2	526.9		398.9	270.3																						88.3		FALSE
GCF_000248055.1	NZ_BAFC01000022.1	region002	TRUE	TRUE	FALSE	TRUE	130903..201339	FALSE	Bacteria_Actinobacteria_Corynebacteriales_Gordoniaceae_Gordonia	Gordonia sputi NBRC 100414	509.7		385	266																						87.5		FALSE
GCF_000298195.1	NZ_BAHC01000097.1	region001	TRUE	TRUE	FALSE	TRUE	0..42667	TRUE	Bacteria_Actinobacteria_Corynebacteriales_Gordoniaceae_Gordonia	Gordonia rhizosphera NBRC 16068					675																					40.5		FALSE
GCF_000332975.1	NZ_BANR01000005.1	region002	TRUE	TRUE	FALSE	TRUE	273629..343832	FALSE	Bacteria_Actinobacteria_Corynebacteriales_Gordoniaceae_Gordonia	Gordonia aichiensis NBRC 108223	524.3		373	255																						86.5		FALSE
GCF_000333015.1	NZ_BANT01000044.1	region001	TRUE	TRUE	FALSE	TRUE	5068..44484	TRUE	Bacteria_Actinobacteria_Corynebacteriales_Gordoniaceae_Gordonia	Gordonia hirsuta DSM 44140 = NBRC 16056	506.3		395.6																							60.8	289.9	TRUE
GCF_000333035.1	NZ_BANU01000011.1	region001	TRUE	TRUE	FALSE	TRUE	6892..70521	FALSE	Bacteria_Actinobacteria_Corynebacteriales_Gordoniaceae_Gordonia	Gordonia sihwensis NBRC 108236					633.2	509.4																				62.9		FALSE
GCF_000423025.1	NZ_AUHE01000003.1	region002	TRUE	TRUE	FALSE	TRUE	302187..347796	TRUE	Bacteria_Actinobacteria_Corynebacteriales_Gordoniaceae_Gordonia	Gordonia shandongensis DSM 45094	478.1		354.6	243.7																						70.1	295.7	TRUE
GCF_001186365.1	NZ_LDTZ01000013.1	region003	TRUE	TRUE	FALSE	TRUE	446370..516613	FALSE	Bacteria_Actinobacteria_Corynebacteriales_Gordoniaceae_Gordonia	Gordonia jacobaea	515.4		376.5	264.7																						82.6		FALSE
GCF_001305675.1	NZ_CP011853.1	region008	TRUE	TRUE	FALSE	TRUE	3880591..3943272	FALSE	Bacteria_Actinobacteria_Corynebacteriales_Gordoniaceae_Gordonia	Gordonia phthalatica					630.4	512.8																				70.3		FALSE
GCF_001485495.1	NZ_BCNF01000114.1	region001	TRUE	TRUE	FALSE	TRUE	0..28650	TRUE	Bacteria_Actinobacteria_Corynebacteriales_Gordoniaceae_Gordonia	Gordonia desulfuricans NBRC 100010	521.2		386.3																									FALSE
GCF_001592365.1	NZ_BCWU01000002.1	region001	TRUE	TRUE	FALSE	TRUE	151505..214265	FALSE	Bacteria_Actinobacteria_Corynebacteriales_Gordoniaceae_Gordonia	Gordonia hydrophobica NBRC 16057					626.1	512.6																				78.4	312.4	TRUE
GCF_002149015.1	NZ_NGFO01000018.1	region001	TRUE	TRUE	TRUE	TRUE	39514..98933	FALSE	Bacteria_Actinobacteria_Corynebacteriales_Gordoniaceae_Gordonia	Gordonia lacunae						548.7																				72.5		FALSE
GCF_002993285.1	NZ_CP027433.1	region004	TRUE	TRUE	FALSE	TRUE	1663008..1732367	FALSE	Bacteria_Actinobacteria_Corynebacteriales_Gordoniaceae_Gordonia	Gordonia iterans	529.5		401.5	251.5																						51.4	290.1	TRUE
GCF_003797185.1	NZ_RKMH01000010.1	region001	TRUE	TRUE	FALSE	TRUE	10603..69897	FALSE	Bacteria_Actinobacteria_Corynebacteriales_Gordoniaceae_Gordonia	Gordonia oryzae	435																									99.7	274.3	TRUE
GCF_003855095.1	NZ_CP033972.1	region003	TRUE	TRUE	FALSE	TRUE	986702..1054774	FALSE	Bacteria_Actinobacteria_Corynebacteriales_Gordoniaceae_Gordonia	Gordonia insulae	535.2			255.2																						64.2		FALSE
GCF_003855095.1	NZ_CP033972.1	region007	TRUE	TRUE	FALSE	TRUE	3058052..3148868	FALSE	Bacteria_Actinobacteria_Corynebacteriales_Gordoniaceae_Gordonia	Gordonia insulae	533.1				682.6	518.5																						FALSE
GCF_004011905.1	NZ_CP027114.1	region001	TRUE	TRUE	TRUE	TRUE	419539..478645	FALSE	Bacteria_Actinobacteria_Corynebacteriales_Gordoniaceae_Gordonia	Gordonia alkanivorans						524.5																				78.9		FALSE
GCF_009828195.1	NZ_WMBR01000002.1	region004	TRUE	TRUE	FALSE	TRUE	819196..868018	TRUE	Bacteria_Actinobacteria_Corynebacteriales_Gordoniaceae_Gordonia	Gordonia mangrovi					678.7	520.9																						FALSE
GCF_009932435.1	NZ_BJOU01000001.1	region003	TRUE	TRUE	TRUE	TRUE	442009..496044	FALSE	Bacteria_Actinobacteria_Corynebacteriales_Gordoniaceae_Gordonia	Gordonia crocea						525.8																						FALSE
GCF_009932475.1	NZ_BJOV01000005.1	region004	TRUE	TRUE	FALSE	TRUE	1364993..1454557	FALSE	Bacteria_Actinobacteria_Corynebacteriales_Gordoniaceae_Gordonia	Gordonia spumicola	526.4		393.4	257.6																						55.9	305.4	TRUE
GCF_012933505.1	NZ_JABBNB010000031.1	region001	TRUE	TRUE	FALSE	TRUE	10844..80177	FALSE	Bacteria_Actinobacteria_Corynebacteriales_Gordoniaceae_Gordonia	Gordonia asplenii					672.5	525																						FALSE
GCF_000346485.2	NZ_KQ976354.1	region021	FALSE	FALSE	FALSE	FALSE	8493369..>8532891	FALSE	Bacteria_Cyanobacteria_Nostocales_Scytonemataceae_Scytonema	Scytonema hofmannii PCC 7110																	86.4	187.9										FALSE
GCF_003864295.1	NZ_BDQK01000013.1	region002	FALSE	FALSE	FALSE	FALSE	196826..239457	FALSE	Bacteria_Cyanobacteria_Oscillatoriophycideae_Chroococcales_Aphanothecaceae_Aphanothece	Aphanothece sacrum FPU1																	69.4	256.6										FALSE
GCF_004123295.1	NZ_SDMK01000001.1	region002	TRUE	FALSE	FALSE	FALSE	504812..557295	FALSE	Bacteria_Acidobacteria_Acidobacteriales_Acidobacteriaceae_Acidipila	Acidipila dinghuensis																												FALSE
GCF_004123295.1	NZ_SDMK01000001.1	region003	FALSE	FALSE	FALSE	FALSE	1128339..1170916	FALSE	Bacteria_Acidobacteria_Acidobacteriales_Acidobacteriaceae_Acidipila	Acidipila dinghuensis																												FALSE
GCF_004339725.1	NZ_SMGK01000001.1	region002	TRUE	FALSE	FALSE	FALSE	559357..645023	FALSE	Bacteria_Acidobacteria_Acidobacteriales_Acidobacteriaceae_Acidipila	Acidipila rosea																												FALSE
GCF_004339725.1	NZ_SMGK01000002.1	region001	FALSE	FALSE	FALSE	FALSE	34228..76787	FALSE	Bacteria_Acidobacteria_Acidobacteriales_Acidobacteriaceae_Acidipila	Acidipila rosea																												FALSE
GCF_003330725.1	NZ_CP030840.1	region003	TRUE	FALSE	FALSE	FALSE	1418544..1466260	FALSE	Bacteria_Acidobacteria_Acidobacteriales_Acidobacteriaceae_Acidisarcina	Acidisarcina polymorpha																												FALSE
GCF_003330725.1	NZ_CP030840.1	region004	FALSE	FALSE	FALSE	FALSE	2636320..2677766	FALSE	Bacteria_Acidobacteria_Acidobacteriales_Acidobacteriaceae_Acidisarcina	Acidisarcina polymorpha																												FALSE
GCF_003330725.1	NZ_CP030840.1	region005	FALSE	FALSE	FALSE	FALSE	3500911..3545179	FALSE	Bacteria_Acidobacteria_Acidobacteriales_Acidobacteriaceae_Acidisarcina	Acidisarcina polymorpha																												FALSE
GCF_003330725.1	NZ_CP030840.1	region011	FALSE	FALSE	FALSE	FALSE	6200715..6242817	FALSE	Bacteria_Acidobacteria_Acidobacteriales_Acidobacteriaceae_Acidisarcina	Acidisarcina polymorpha																												FALSE
GCF_003330725.1	NZ_CP030840.1	region012	FALSE	FALSE	FALSE	FALSE	6390639..6437951	FALSE	Bacteria_Acidobacteria_Acidobacteriales_Acidobacteriaceae_Acidisarcina	Acidisarcina polymorpha																									33.7			FALSE
GCF_000022565.1	NC_012483.1	region002	TRUE	FALSE	FALSE	FALSE	1305959..1391455	FALSE	Bacteria_Acidobacteria_Acidobacteriales_Acidobacteriaceae_Acidobacterium	Acidobacterium capsulatum ATCC 51196																												FALSE
GCF_000022565.1	NC_012483.1	region004	FALSE	FALSE	FALSE	FALSE	3111686..3154272	FALSE	Bacteria_Acidobacteria_Acidobacteriales_Acidobacteriaceae_Acidobacterium	Acidobacterium capsulatum ATCC 51196																									96			FALSE
GCF_900108185.1	NZ_FNVA01000003.1	region001	TRUE	FALSE	FALSE	FALSE	122006..176697	FALSE	Bacteria_Acidobacteria_Acidobacteriales_Acidobacteriaceae_Bryocella	Bryocella elongata																												FALSE
GCF_900108185.1	NZ_FNVA01000003.1	region002	FALSE	FALSE	FALSE	FALSE	504440..547122	FALSE	Bacteria_Acidobacteria_Acidobacteriales_Acidobacteriaceae_Bryocella	Bryocella elongata																												FALSE
GCF_900108185.1	NZ_FNVA01000006.1	region001	TRUE	FALSE	FALSE	FALSE	38641..86552	FALSE	Bacteria_Acidobacteria_Acidobacteriales_Acidobacteriaceae_Bryocella	Bryocella elongata																												FALSE
GCF_000014005.1	NC_008009.1	region004	FALSE	FALSE	FALSE	FALSE	3380776..3423072	FALSE	Bacteria_Acidobacteria_Acidobacteriales_Acidobacteriaceae_Candidatus Koribacter	Candidatus Koribacter versatilis Ellin345																												FALSE
GCF_000014005.1	NC_008009.1	region005	FALSE	FALSE	FALSE	FALSE	3494697..3537262	FALSE	Bacteria_Acidobacteria_Acidobacteriales_Acidobacteriaceae_Candidatus Koribacter	Candidatus Koribacter versatilis Ellin345																												FALSE
GCF_000745965.1	NZ_JQKI01000048.1	region001	FALSE	FALSE	FALSE	FALSE	12270..49370	TRUE	Bacteria_Acidobacteria_Acidobacteriales_Acidobacteriaceae_Edaphobacter	Edaphobacter aggregans DSM 19364																												FALSE
GCF_004217555.1	NZ_SHKW01000001.1	region008	FALSE	FALSE	FALSE	FALSE	5443260..5485879	FALSE	Bacteria_Acidobacteria_Acidobacteriales_Acidobacteriaceae_Edaphobacter	Edaphobacter modestus																									34.1			FALSE
GCF_014201365.1	NZ_JACHEA010000001.1	region005	TRUE	FALSE	FALSE	FALSE	1395851..1443933	FALSE	Bacteria_Acidobacteria_Acidobacteriales_Acidobacteriaceae_Edaphobacter	Edaphobacter lichenicola																												FALSE
GCF_014201365.1	NZ_JACHEA010000001.1	region007	FALSE	FALSE	FALSE	FALSE	4026675..4066735	FALSE	Bacteria_Acidobacteria_Acidobacteriales_Acidobacteriaceae_Edaphobacter	Edaphobacter lichenicola																												FALSE
GCF_014201365.1	NZ_JACHEA010000001.1	region008	FALSE	FALSE	FALSE	FALSE	4068590..4111887	FALSE	Bacteria_Acidobacteria_Acidobacteriales_Acidobacteriaceae_Edaphobacter	Edaphobacter lichenicola																												FALSE
GCF_014640335.1	NZ_BMGT01000002.1	region001	FALSE	FALSE	FALSE	FALSE	58288..100889	FALSE	Bacteria_Acidobacteria_Acidobacteriales_Acidobacteriaceae_Edaphobacter	Edaphobacter dinghuensis																												FALSE
GCF_014640335.1	NZ_BMGT01000004.1	region001	TRUE	FALSE	FALSE	FALSE	0..65808	TRUE	Bacteria_Acidobacteria_Acidobacteriales_Acidobacteriaceae_Edaphobacter	Edaphobacter dinghuensis																												FALSE
GCF_014640335.1	NZ_BMGT01000005.1	region001	TRUE	FALSE	FALSE	FALSE	0..31822	TRUE	Bacteria_Acidobacteria_Acidobacteriales_Acidobacteriaceae_Edaphobacter	Edaphobacter dinghuensis																												FALSE
GCF_014642855.1	NZ_BMJB01000001.1	region002	FALSE	FALSE	FALSE	FALSE	1005310..1047863	FALSE	Bacteria_Acidobacteria_Acidobacteriales_Acidobacteriaceae_Edaphobacter	Edaphobacter acidisoli																												FALSE
GCF_000178955.2	NC_016631.1	region006	TRUE	FALSE	FALSE	FALSE	2311299..2366252	FALSE	Bacteria_Acidobacteria_Acidobacteriales_Acidobacteriaceae_Granulicella	Granulicella mallensis MP5ACTX8																												FALSE
GCF_000178955.2	NC_016631.1	region009	TRUE	FALSE	FALSE	FALSE	4059043..4147701	FALSE	Bacteria_Acidobacteria_Acidobacteriales_Acidobacteriaceae_Granulicella	Granulicella mallensis MP5ACTX8																												FALSE
GCF_000178955.2	NC_016631.1	region011	TRUE	FALSE	FALSE	FALSE	5141508..5185534	FALSE	Bacteria_Acidobacteria_Acidobacteriales_Acidobacteriaceae_Granulicella	Granulicella mallensis MP5ACTX8																												FALSE
GCF_000178955.2	NC_016631.1	region013	FALSE	FALSE	FALSE	FALSE	5242458..5285092	FALSE	Bacteria_Acidobacteria_Acidobacteriales_Acidobacteriaceae_Granulicella	Granulicella mallensis MP5ACTX8																									107.8			FALSE
GCF_000178975.2	NC_015064.1	region005	TRUE	FALSE	FALSE	FALSE	2152507..2204481	FALSE	Bacteria_Acidobacteria_Acidobacteriales_Acidobacteriaceae_Granulicella	Granulicella tundricola MP5ACTX9																									113.4			FALSE
GCF_014203275.1	NZ_JACHIP010000001.1	region002	TRUE	FALSE	FALSE	FALSE	1121164..1169228	FALSE	Bacteria_Acidobacteria_Acidobacteriales_Acidobacteriaceae_Granulicella	Granulicella aggregans																												FALSE
GCF_900188085.1	NZ_FZOU01000001.1	region001	TRUE	FALSE	FALSE	FALSE	1343112..1395207	FALSE	Bacteria_Acidobacteria_Acidobacteriales_Acidobacteriaceae_Granulicella	Granulicella rosea																												FALSE
GCF_000688455.1	NZ_JIAL01000001.1	region006	TRUE	FALSE	FALSE	FALSE	3504941..3577405	FALSE	Bacteria_Acidobacteria_Acidobacteriales_Acidobacteriaceae_Pseudacidobacterium	Pseudacidobacterium ailaaui																									90.8			FALSE
GCF_001006305.1	NZ_LBHJ01000001.1	region002	TRUE	FALSE	FALSE	FALSE	838393..890748	FALSE	Bacteria_Acidobacteria_Acidobacteriales_Acidobacteriaceae_Silvibacterium	Silvibacterium bohemicum																												FALSE
GCF_001006305.1	NZ_LBHJ01000012.1	region001	FALSE	FALSE	FALSE	FALSE	709585..752216	FALSE	Bacteria_Acidobacteria_Acidobacteriales_Acidobacteriaceae_Silvibacterium	Silvibacterium bohemicum																												FALSE
GCF_001006305.1	NZ_LBHJ01000019.1	region002	TRUE	FALSE	FALSE	FALSE	347515..453966	FALSE	Bacteria_Acidobacteria_Acidobacteriales_Acidobacteriaceae_Silvibacterium	Silvibacterium bohemicum																												FALSE
GCF_001449115.1	NZ_LAIJ01000009.1	region002	FALSE	FALSE	FALSE	FALSE	1962361..2005122	FALSE	Bacteria_Acidobacteria_Acidobacteriales_Acidobacteriaceae_Terracidiphilus	Terracidiphilus gabretensis																												FALSE
GCF_001449115.1	NZ_LAIJ01000009.1	region003	TRUE	FALSE	FALSE	FALSE	2062978..2132299	FALSE	Bacteria_Acidobacteria_Acidobacteriales_Acidobacteriaceae_Terracidiphilus	Terracidiphilus gabretensis																												FALSE
GCF_001449115.1	NZ_LAIJ01000012.1	region001	FALSE	FALSE	FALSE	FALSE	29033..69931	FALSE	Bacteria_Acidobacteria_Acidobacteriales_Acidobacteriaceae_Terracidiphilus	Terracidiphilus gabretensis																												FALSE
GCF_001449115.1	NZ_LAIJ01000012.1	region002	TRUE	FALSE	FALSE	FALSE	205308..251272	FALSE	Bacteria_Acidobacteria_Acidobacteriales_Acidobacteriaceae_Terracidiphilus	Terracidiphilus gabretensis																												FALSE
GCF_008000815.1	NZ_CP042806.1	region006	FALSE	FALSE	FALSE	FALSE	3449372..3491946	FALSE	Bacteria_Acidobacteria_Acidobacteriales_Acidobacteriaceae_Terriglobus	Terriglobus albidus																												FALSE
GCF_000820845.2	NZ_CBXV010000003.1	region001	FALSE	FALSE	FALSE	FALSE	0..32258	TRUE	Bacteria_Acidobacteria_Blastocatellia_Blastocatellales_Pyrinomonadaceae_Pyrinomonas	Pyrinomonas methylaliphatogenes																												FALSE
GCF_000820845.2	NZ_CBXV010000007.1	region001	FALSE	FALSE	FALSE	FALSE	231544..274079	FALSE	Bacteria_Acidobacteria_Blastocatellia_Blastocatellales_Pyrinomonadaceae_Pyrinomonas	Pyrinomonas methylaliphatogenes																												FALSE
GCF_015277775.1	NZ_CP063849.1	region002	FALSE	FALSE	FALSE	FALSE	3448738..3488538	FALSE	Bacteria_Acidobacteria_Bryobacterales_Bryobacteraceae_Paludibaculum	Paludibaculum fermentans																												FALSE
GCF_015277775.1	NZ_CP063849.1	region006	FALSE	FALSE	FALSE	FALSE	6040286..6080876	FALSE	Bacteria_Acidobacteria_Bryobacterales_Bryobacteraceae_Paludibaculum	Paludibaculum fermentans																												FALSE
GCF_015277775.1	NZ_CP063849.1	region007	FALSE	FALSE	FALSE	FALSE	6871679..6913368	FALSE	Bacteria_Acidobacteria_Bryobacterales_Bryobacteraceae_Paludibaculum	Paludibaculum fermentans																												FALSE
GCF_017377855.1	NZ_JAFREP010000002.1	region001	TRUE	FALSE	FALSE	FALSE	190952..284072	FALSE	Bacteria_Acidobacteria_Holophagae_Acanthopleuribacterales_Acanthopleuribacteraceae_Acanthopleuribacter	Acanthopleuribacter pedis																												FALSE
GCF_017377855.1	NZ_JAFREP010000002.1	region002	TRUE	FALSE	FALSE	FALSE	377303..420302	FALSE	Bacteria_Acidobacteria_Holophagae_Acanthopleuribacterales_Acanthopleuribacteraceae_Acanthopleuribacter	Acanthopleuribacter pedis																												FALSE
GCF_017377855.1	NZ_JAFREP010000002.1	region003	TRUE	FALSE	FALSE	FALSE	452867..532278	FALSE	Bacteria_Acidobacteria_Holophagae_Acanthopleuribacterales_Acanthopleuribacteraceae_Acanthopleuribacter	Acanthopleuribacter pedis																									162.4			FALSE
GCF_017377855.1	NZ_JAFREP010000003.1	region003	TRUE	FALSE	FALSE	FALSE	287390..344045	FALSE	Bacteria_Acidobacteria_Holophagae_Acanthopleuribacterales_Acanthopleuribacteraceae_Acanthopleuribacter	Acanthopleuribacter pedis																									123.1			FALSE
GCF_017377855.1	NZ_JAFREP010000003.1	region004	TRUE	FALSE	FALSE	FALSE	395106..511099	FALSE	Bacteria_Acidobacteria_Holophagae_Acanthopleuribacterales_Acanthopleuribacteraceae_Acanthopleuribacter	Acanthopleuribacter pedis																									167.9			FALSE
GCF_017377855.1	NZ_JAFREP010000004.1	region001	TRUE	FALSE	FALSE	FALSE	126650..189488	FALSE	Bacteria_Acidobacteria_Holophagae_Acanthopleuribacterales_Acanthopleuribacteraceae_Acanthopleuribacter	Acanthopleuribacter pedis																									64.6			FALSE
GCF_017377855.1	NZ_JAFREP010000005.1	region001	FALSE	FALSE	FALSE	FALSE	0..31103	TRUE	Bacteria_Acidobacteria_Holophagae_Acanthopleuribacterales_Acanthopleuribacteraceae_Acanthopleuribacter	Acanthopleuribacter pedis																												FALSE
GCF_017377855.1	NZ_JAFREP010000006.1	region001	FALSE	FALSE	FALSE	FALSE	840..62324	FALSE	Bacteria_Acidobacteria_Holophagae_Acanthopleuribacterales_Acanthopleuribacteraceae_Acanthopleuribacter	Acanthopleuribacter pedis																												FALSE
GCF_017377855.1	NZ_JAFREP010000006.1	region002	TRUE	FALSE	FALSE	FALSE	305830..399982	FALSE	Bacteria_Acidobacteria_Holophagae_Acanthopleuribacterales_Acanthopleuribacteraceae_Acanthopleuribacter	Acanthopleuribacter pedis																												FALSE
GCF_017377855.1	NZ_JAFREP010000007.1	region001	TRUE	FALSE	FALSE	FALSE	65541..124982	FALSE	Bacteria_Acidobacteria_Holophagae_Acanthopleuribacterales_Acanthopleuribacteraceae_Acanthopleuribacter	Acanthopleuribacter pedis																												FALSE
GCF_017377855.1	NZ_JAFREP010000010.1	region001	TRUE	FALSE	FALSE	FALSE	20409..117463	FALSE	Bacteria_Acidobacteria_Holophagae_Acanthopleuribacterales_Acanthopleuribacteraceae_Acanthopleuribacter	Acanthopleuribacter pedis																												FALSE
GCF_017377855.1	NZ_JAFREP010000010.1	region002	TRUE	FALSE	FALSE	FALSE	140622..198102	FALSE	Bacteria_Acidobacteria_Holophagae_Acanthopleuribacterales_Acanthopleuribacteraceae_Acanthopleuribacter	Acanthopleuribacter pedis																												FALSE
GCF_017377855.1	NZ_JAFREP010000010.1	region003	TRUE	FALSE	FALSE	FALSE	207856..251795	FALSE	Bacteria_Acidobacteria_Holophagae_Acanthopleuribacterales_Acanthopleuribacteraceae_Acanthopleuribacter	Acanthopleuribacter pedis																									78			FALSE
GCF_017377855.1	NZ_JAFREP010000011.1	region001	TRUE	FALSE	FALSE	FALSE	35820..133115	FALSE	Bacteria_Acidobacteria_Holophagae_Acanthopleuribacterales_Acanthopleuribacteraceae_Acanthopleuribacter	Acanthopleuribacter pedis																												FALSE
GCF_017377855.1	NZ_JAFREP010000012.1	region001	TRUE	FALSE	FALSE	FALSE	0..69677	TRUE	Bacteria_Acidobacteria_Holophagae_Acanthopleuribacterales_Acanthopleuribacteraceae_Acanthopleuribacter	Acanthopleuribacter pedis																												FALSE
GCF_017377855.1	NZ_JAFREP010000013.1	region001	FALSE	FALSE	FALSE	FALSE	59434..110040	FALSE	Bacteria_Acidobacteria_Holophagae_Acanthopleuribacterales_Acanthopleuribacteraceae_Acanthopleuribacter	Acanthopleuribacter pedis																												FALSE
GCF_017377855.1	NZ_JAFREP010000013.1	region002	TRUE	FALSE	FALSE	FALSE	287571..357014	TRUE	Bacteria_Acidobacteria_Holophagae_Acanthopleuribacterales_Acanthopleuribacteraceae_Acanthopleuribacter	Acanthopleuribacter pedis																									121.3			FALSE
GCF_017377855.1	NZ_JAFREP010000019.1	region001	TRUE	FALSE	FALSE	FALSE	4219..68267	FALSE	Bacteria_Acidobacteria_Holophagae_Acanthopleuribacterales_Acanthopleuribacteraceae_Acanthopleuribacter	Acanthopleuribacter pedis																												FALSE
GCF_017377855.1	NZ_JAFREP010000026.1	region001	TRUE	FALSE	FALSE	FALSE	43752..122599	FALSE	Bacteria_Acidobacteria_Holophagae_Acanthopleuribacterales_Acanthopleuribacteraceae_Acanthopleuribacter	Acanthopleuribacter pedis																									116.7			FALSE
GCF_017377855.1	NZ_JAFREP010000030.1	region001	TRUE	FALSE	FALSE	FALSE	37908..135990	TRUE	Bacteria_Acidobacteria_Holophagae_Acanthopleuribacterales_Acanthopleuribacteraceae_Acanthopleuribacter	Acanthopleuribacter pedis																												FALSE
GCF_017377855.1	NZ_JAFREP010000035.1	region001	TRUE	FALSE	FALSE	FALSE	7354..63268	FALSE	Bacteria_Acidobacteria_Holophagae_Acanthopleuribacterales_Acanthopleuribacteraceae_Acanthopleuribacter	Acanthopleuribacter pedis																									145.9			FALSE
GCF_017377855.1	NZ_JAFREP010000038.1	region001	TRUE	FALSE	FALSE	FALSE	55074..96430	TRUE	Bacteria_Acidobacteria_Holophagae_Acanthopleuribacterales_Acanthopleuribacteraceae_Acanthopleuribacter	Acanthopleuribacter pedis																												FALSE
GCF_017377855.1	NZ_JAFREP010000042.1	region001	TRUE	FALSE	FALSE	FALSE	0..43769	TRUE	Bacteria_Acidobacteria_Holophagae_Acanthopleuribacterales_Acanthopleuribacteraceae_Acanthopleuribacter	Acanthopleuribacter pedis																									101.5			FALSE
GCF_017377855.1	NZ_JAFREP010000047.1	region001	TRUE	FALSE	FALSE	FALSE	197..54703	FALSE	Bacteria_Acidobacteria_Holophagae_Acanthopleuribacterales_Acanthopleuribacteraceae_Acanthopleuribacter	Acanthopleuribacter pedis																												FALSE
GCF_017377855.1	NZ_JAFREP010000050.1	region001	TRUE	FALSE	FALSE	FALSE	7070..52542	TRUE	Bacteria_Acidobacteria_Holophagae_Acanthopleuribacterales_Acanthopleuribacteraceae_Acanthopleuribacter	Acanthopleuribacter pedis																												FALSE
GCF_017498545.1	NZ_CP071793.1	region001	TRUE	FALSE	FALSE	FALSE	263319..304364	FALSE	Bacteria_Acidobacteria_Holophagae_Acanthopleuribacterales_Acanthopleuribacteraceae_Sulfidibacter	Sulfidibacter corallicola																												FALSE
GCF_017498545.1	NZ_CP071793.1	region003	FALSE	FALSE	FALSE	FALSE	1188889..1231086	FALSE	Bacteria_Acidobacteria_Holophagae_Acanthopleuribacterales_Acanthopleuribacteraceae_Sulfidibacter	Sulfidibacter corallicola																												FALSE
GCF_017498545.1	NZ_CP071793.1	region005	TRUE	FALSE	FALSE	FALSE	1382861..1434181	FALSE	Bacteria_Acidobacteria_Holophagae_Acanthopleuribacterales_Acanthopleuribacteraceae_Sulfidibacter	Sulfidibacter corallicola																												FALSE
GCF_017498545.1	NZ_CP071793.1	region008	TRUE	FALSE	FALSE	FALSE	2396665..2546445	FALSE	Bacteria_Acidobacteria_Holophagae_Acanthopleuribacterales_Acanthopleuribacteraceae_Sulfidibacter	Sulfidibacter corallicola																												FALSE
GCF_017498545.1	NZ_CP071793.1	region009	FALSE	FALSE	FALSE	FALSE	2578862..2628472	FALSE	Bacteria_Acidobacteria_Holophagae_Acanthopleuribacterales_Acanthopleuribacteraceae_Sulfidibacter	Sulfidibacter corallicola																												FALSE
GCF_017498545.1	NZ_CP071793.1	region010	TRUE	FALSE	FALSE	FALSE	2641297..2772347	FALSE	Bacteria_Acidobacteria_Holophagae_Acanthopleuribacterales_Acanthopleuribacteraceae_Sulfidibacter	Sulfidibacter corallicola																												FALSE
GCF_017498545.1	NZ_CP071793.1	region013	TRUE	FALSE	FALSE	FALSE	2993299..3111118	FALSE	Bacteria_Acidobacteria_Holophagae_Acanthopleuribacterales_Acanthopleuribacteraceae_Sulfidibacter	Sulfidibacter corallicola																												FALSE
GCF_017498545.1	NZ_CP071793.1	region016	FALSE	FALSE	FALSE	FALSE	3669961..3711216	FALSE	Bacteria_Acidobacteria_Holophagae_Acanthopleuribacterales_Acanthopleuribacteraceae_Sulfidibacter	Sulfidibacter corallicola																												FALSE
GCF_017498545.1	NZ_CP071793.1	region017	TRUE	FALSE	FALSE	FALSE	4374182..4517637	FALSE	Bacteria_Acidobacteria_Holophagae_Acanthopleuribacterales_Acanthopleuribacteraceae_Sulfidibacter	Sulfidibacter corallicola																									87			FALSE
GCF_017498545.1	NZ_CP071793.1	region019	FALSE	FALSE	FALSE	FALSE	5694940..5737689	FALSE	Bacteria_Acidobacteria_Holophagae_Acanthopleuribacterales_Acanthopleuribacteraceae_Sulfidibacter	Sulfidibacter corallicola																									94.3			FALSE
GCF_017498545.1	NZ_CP071793.1	region020	TRUE	FALSE	FALSE	FALSE	5896392..5957172	FALSE	Bacteria_Acidobacteria_Holophagae_Acanthopleuribacterales_Acanthopleuribacteraceae_Sulfidibacter	Sulfidibacter corallicola																									141.4			FALSE
GCF_017498545.1	NZ_CP071793.1	region022	TRUE	FALSE	FALSE	FALSE	6647010..6698705	FALSE	Bacteria_Acidobacteria_Holophagae_Acanthopleuribacterales_Acanthopleuribacteraceae_Sulfidibacter	Sulfidibacter corallicola																									85.3			FALSE
GCF_017498545.1	NZ_CP071793.1	region023	TRUE	FALSE	FALSE	FALSE	6874903..6931795	FALSE	Bacteria_Acidobacteria_Holophagae_Acanthopleuribacterales_Acanthopleuribacteraceae_Sulfidibacter	Sulfidibacter corallicola																												FALSE
GCF_017498545.1	NZ_CP071793.1	region026	TRUE	FALSE	FALSE	FALSE	7212601..7333137	FALSE	Bacteria_Acidobacteria_Holophagae_Acanthopleuribacterales_Acanthopleuribacteraceae_Sulfidibacter	Sulfidibacter corallicola																												FALSE
GCF_014041935.1	NZ_CP059491.1	region004	TRUE	TRUE	TRUE	TRUE	575854..635346	FALSE	Bacteria_Actinobacteria_Corynebacteriales_Gordoniaceae_Gordonia	Gordonia jinghuaiqii						532																				77.6		FALSE
GCF_017498545.1	NZ_CP071793.1	region029	TRUE	FALSE	FALSE	FALSE	8214589..8250663	FALSE	Bacteria_Acidobacteria_Holophagae_Acanthopleuribacterales_Acanthopleuribacteraceae_Sulfidibacter	Sulfidibacter corallicola																												FALSE
GCF_017498545.1	NZ_CP071793.1	region030	TRUE	FALSE	FALSE	FALSE	8293848..8408228	FALSE	Bacteria_Acidobacteria_Holophagae_Acanthopleuribacterales_Acanthopleuribacteraceae_Sulfidibacter	Sulfidibacter corallicola																									139.7	72.1		TRUE
GCF_017498545.1	NZ_CP071793.1	region032	TRUE	FALSE	FALSE	FALSE	9495499..9536686	FALSE	Bacteria_Acidobacteria_Holophagae_Acanthopleuribacterales_Acanthopleuribacteraceae_Sulfidibacter	Sulfidibacter corallicola																												FALSE
GCF_017498545.1	NZ_CP071793.1	region034	TRUE	FALSE	FALSE	FALSE	9880740..9936724	FALSE	Bacteria_Acidobacteria_Holophagae_Acanthopleuribacterales_Acanthopleuribacteraceae_Sulfidibacter	Sulfidibacter corallicola																												FALSE
GCF_017498545.1	NZ_CP071793.1	region035	TRUE	FALSE	FALSE	FALSE	10179263..10347296	FALSE	Bacteria_Acidobacteria_Holophagae_Acanthopleuribacterales_Acanthopleuribacteraceae_Sulfidibacter	Sulfidibacter corallicola																												FALSE
GCF_017498545.1	NZ_CP071793.1	region037	TRUE	FALSE	FALSE	FALSE	10460021..10524962	FALSE	Bacteria_Acidobacteria_Holophagae_Acanthopleuribacterales_Acanthopleuribacteraceae_Sulfidibacter	Sulfidibacter corallicola																									103.6			FALSE
GCF_017498545.1	NZ_CP071793.1	region038	TRUE	FALSE	FALSE	FALSE	10631975..10767052	FALSE	Bacteria_Acidobacteria_Holophagae_Acanthopleuribacterales_Acanthopleuribacteraceae_Sulfidibacter	Sulfidibacter corallicola																												FALSE
GCF_017498545.1	NZ_CP071793.1	region040	TRUE	FALSE	FALSE	FALSE	10851433..10896459	FALSE	Bacteria_Acidobacteria_Holophagae_Acanthopleuribacterales_Acanthopleuribacteraceae_Sulfidibacter	Sulfidibacter corallicola																												FALSE
GCF_017498545.1	NZ_CP071793.1	region041	TRUE	FALSE	FALSE	FALSE	10952799..11030070	FALSE	Bacteria_Acidobacteria_Holophagae_Acanthopleuribacterales_Acanthopleuribacteraceae_Sulfidibacter	Sulfidibacter corallicola																									154.7			FALSE
GCF_017498545.1	NZ_CP071793.1	region043	TRUE	FALSE	FALSE	FALSE	11419378..11468306	FALSE	Bacteria_Acidobacteria_Holophagae_Acanthopleuribacterales_Acanthopleuribacteraceae_Sulfidibacter	Sulfidibacter corallicola																												FALSE
GCF_000687145.1	NZ_JMFG01000020.1	region001	FALSE	FALSE	FALSE	FALSE	89408..140293	FALSE	Bacteria_Acidobacteria_Thermoanaerobaculia_Thermoanaerobaculales_Thermoanaerobaculaceae_Thermoanaerobaculum	Thermoanaerobaculum aquaticum																												FALSE
GCF_001618865.1	NZ_CP015136.1	region003	FALSE	FALSE	FALSE	FALSE	6603295..6645989	FALSE	Bacteria_Acidobacteria_Vicinamibacteria_Vicinamibacterales_Vicinamibacteraceae_Luteitalea	Luteitalea pratensis																												FALSE
GCF_009650215.1	NZ_CP045851.1	region003	TRUE	FALSE	FALSE	FALSE	1260267..1314650	FALSE	Bacteria_Actinobacteria_Acidimicrobiia_Acidimicrobiales_Iamiaceae_Actinomarinicola	Actinomarinicola tropica																												FALSE
GCF_009650215.1	NZ_CP045851.1	region005	FALSE	FALSE	FALSE	FALSE	2658422..2709038	FALSE	Bacteria_Actinobacteria_Acidimicrobiia_Acidimicrobiales_Iamiaceae_Actinomarinicola	Actinomarinicola tropica																												FALSE
GCF_014805525.1	NZ_JACFSZ010000012.1	region001	FALSE	FALSE	FALSE	FALSE	2341..45008	FALSE	Bacteria_Actinobacteria_Acidimicrobiia_Acidimicrobiales_Iamiaceae_Rhabdothermincola	Rhabdothermincola sediminis																												FALSE
GCF_021246445.1	NZ_JAJQXW010000001.1	region001	FALSE	FALSE	FALSE	FALSE	603315..646405	FALSE	Bacteria_Actinobacteria_Acidimicrobiia_Acidimicrobiales_Iamiaceae_Rhabdothermincola	Rhabdothermincola salaria																												FALSE
GCF_021246445.1	NZ_JAJQXW010000002.1	region002	FALSE	FALSE	FALSE	FALSE	499170..579018	FALSE	Bacteria_Actinobacteria_Acidimicrobiia_Acidimicrobiales_Iamiaceae_Rhabdothermincola	Rhabdothermincola salaria																												FALSE
GCF_000348785.1	NC_020520.1	region003	FALSE	FALSE	FALSE	FALSE	1675563..1718248	FALSE	Bacteria_Actinobacteria_Acidimicrobiia_Acidimicrobiales_Ilumatobacteraceae_Ilumatobacter	Ilumatobacter coccineus YM16-304																												FALSE
GCF_000350145.1	NZ_BAOL01000175.1	region001	FALSE	FALSE	FALSE	FALSE	0..17387	TRUE	Bacteria_Actinobacteria_Acidimicrobiia_Acidimicrobiales_Ilumatobacteraceae_Ilumatobacter	Ilumatobacter nonamiensis YM16-303																												FALSE
GCF_004364865.1	NZ_SOAU01000001.1	region003	FALSE	FALSE	FALSE	FALSE	2462503..2505113	FALSE	Bacteria_Actinobacteria_Acidimicrobiia_Acidimicrobiales_Ilumatobacteraceae_Ilumatobacter	Ilumatobacter fluminis																												FALSE
GCF_000269805.1	NZ_JH711481.1	region001	TRUE	FALSE	FALSE	FALSE	0..48089	TRUE	Bacteria_Actinobacteria_Actinomycetales_Actinomycetaceae_Actinomyces	Actinomyces massiliensis 4401292			348.5																									FALSE
GCF_000295095.1	NZ_JH806633.1	region001	FALSE	FALSE	FALSE	FALSE	602368..733949	FALSE	Bacteria_Actinobacteria_Actinomycetales_Actinomycetaceae_Actinomyces	Actinomyces timonensis DSM 23838																												FALSE
GCF_000429265.1	NZ_AUBN01000010.1	region001	TRUE	FALSE	FALSE	FALSE	61641..106924	FALSE	Bacteria_Actinobacteria_Actinomycetales_Actinomycetaceae_Actinomyces	Actinomyces gerencseriae DSM 6844																												FALSE
GCF_000429265.1	NZ_AUBN01000017.1	region001	TRUE	FALSE	FALSE	FALSE	0..64646	TRUE	Bacteria_Actinobacteria_Actinomycetales_Actinomycetaceae_Actinomyces	Actinomyces gerencseriae DSM 6844																												FALSE
GCF_000711965.1	NZ_JONS01000024.1	region001	TRUE	FALSE	FALSE	FALSE	19794..61471	TRUE	Bacteria_Actinobacteria_Actinomycetales_Actinomycetaceae_Actinomyces	Actinomyces israelii DSM 43320																												FALSE
GCF_000711965.1	NZ_JONS01000025.1	region001	TRUE	FALSE	FALSE	FALSE	0..34276	TRUE	Bacteria_Actinobacteria_Actinomycetales_Actinomycetaceae_Actinomyces	Actinomyces israelii DSM 43320																												FALSE
GCF_000711965.1	NZ_JONS01000063.1	region001	TRUE	FALSE	FALSE	FALSE	0..16469	TRUE	Bacteria_Actinobacteria_Actinomycetales_Actinomycetaceae_Actinomyces	Actinomyces israelii DSM 43320																												FALSE
GCF_014070455.1	NZ_CP059694.1	region009	TRUE	TRUE	TRUE	TRUE	1592758..1651856	FALSE	Bacteria_Actinobacteria_Corynebacteriales_Gordoniaceae_Gordonia	Gordonia rubripertincta						526.3																				75.4		FALSE
GCF_004010955.1	NZ_CP025227.1	region002	TRUE	FALSE	FALSE	FALSE	464319..529330	FALSE	Bacteria_Actinobacteria_Actinomycetales_Actinomycetaceae_Actinomyces	Actinomyces wuliandei																												FALSE
GCF_014197435.1	NZ_JACIFP010000001.1	region002	TRUE	TRUE	FALSE	TRUE	517678..612356	FALSE	Bacteria_Actinobacteria_Corynebacteriales_Gordoniaceae_Gordonia	Gordonia humi	512.4		385.3	287.6																						60	307.4	TRUE
GCF_004102025.1	NZ_CP025228.1	region002	TRUE	FALSE	FALSE	FALSE	420687..476445	FALSE	Bacteria_Actinobacteria_Actinomycetales_Actinomycetaceae_Actinomyces	Actinomyces qiguomingii																												FALSE
GCF_900445045.1	NZ_UFSA01000001.1	region001	FALSE	FALSE	FALSE	FALSE	455553..592849	FALSE	Bacteria_Actinobacteria_Actinomycetales_Actinomycetaceae_Actinomyces	Actinomyces denticolens																												FALSE
GCF_006716575.1	NZ_VFPI01000001.1	region004	FALSE	FALSE	TRUE	TRUE	1552934..1567804	FALSE	Bacteria_Actinobacteria_Actinomycetia incertae sedis_Halopolyspora	Halopolyspora algeriensis																												FALSE
GCF_000371785.1	NZ_AQUI01000002.1	region002	FALSE	FALSE	TRUE	TRUE	813718..886222	FALSE	Bacteria_Actinobacteria_Actinopolysporales_Actinopolysporaceae_Actinopolyspora	Actinopolyspora halophila DSM 43834																												FALSE
GCF_000371785.1	NZ_AQUI01000002.1	region013	FALSE	FALSE	TRUE	TRUE	5129152..5140958	FALSE	Bacteria_Actinobacteria_Actinopolysporales_Actinopolysporaceae_Actinopolyspora	Actinopolyspora halophila DSM 43834																												FALSE
GCF_000384035.1	NZ_KB913024.1	region008	FALSE	FALSE	FALSE	FALSE	1292129..1333465	FALSE	Bacteria_Actinobacteria_Actinopolysporales_Actinopolysporaceae_Actinopolyspora	Actinopolyspora mortivallis DSM 44261																												FALSE
GCF_000384035.1	NZ_KB913024.1	region012	FALSE	FALSE	FALSE	FALSE	1508763..1575609	FALSE	Bacteria_Actinobacteria_Actinopolysporales_Actinopolysporaceae_Actinopolyspora	Actinopolyspora mortivallis DSM 44261																												FALSE
GCF_000384035.1	NZ_KB913024.1	region017	FALSE	FALSE	TRUE	TRUE	3227322..3240772	FALSE	Bacteria_Actinobacteria_Actinopolysporales_Actinopolysporaceae_Actinopolyspora	Actinopolyspora mortivallis DSM 44261																												FALSE
GCF_000384035.1	NZ_KB913024.1	region020	FALSE	FALSE	TRUE	TRUE	4099063..4110872	FALSE	Bacteria_Actinobacteria_Actinopolysporales_Actinopolysporaceae_Actinopolyspora	Actinopolyspora mortivallis DSM 44261																												FALSE
GCF_002263515.1	NZ_CP022752.1	region002	FALSE	FALSE	TRUE	TRUE	713386..761545	FALSE	Bacteria_Actinobacteria_Actinopolysporales_Actinopolysporaceae_Actinopolyspora	Actinopolyspora erythraea																												FALSE
GCF_002263515.1	NZ_CP022752.1	region008	TRUE	FALSE	FALSE	FALSE	2527576..2569517	FALSE	Bacteria_Actinobacteria_Actinopolysporales_Actinopolysporaceae_Actinopolyspora	Actinopolyspora erythraea																												FALSE
GCF_002263515.1	NZ_CP022752.1	region011	FALSE	FALSE	FALSE	FALSE	2820768..2860678	FALSE	Bacteria_Actinobacteria_Actinopolysporales_Actinopolysporaceae_Actinopolyspora	Actinopolyspora erythraea																												FALSE
GCF_002263515.1	NZ_CP022752.1	region013	FALSE	FALSE	FALSE	FALSE	2981146..3085953	FALSE	Bacteria_Actinobacteria_Actinopolysporales_Actinopolysporaceae_Actinopolyspora	Actinopolyspora erythraea																										89.5	315.3	TRUE
GCF_002263515.1	NZ_CP022752.1	region017	FALSE	FALSE	FALSE	FALSE	3484720..3526188	FALSE	Bacteria_Actinobacteria_Actinopolysporales_Actinopolysporaceae_Actinopolyspora	Actinopolyspora erythraea																												FALSE
GCF_002263515.1	NZ_CP022752.1	region020	TRUE	FALSE	FALSE	FALSE	4148668..4229974	FALSE	Bacteria_Actinobacteria_Actinopolysporales_Actinopolysporaceae_Actinopolyspora	Actinopolyspora erythraea																												FALSE
GCF_002263515.1	NZ_CP022752.1	region023	TRUE	FALSE	FALSE	FALSE	4869073..4920526	FALSE	Bacteria_Actinobacteria_Actinopolysporales_Actinopolysporaceae_Actinopolyspora	Actinopolyspora erythraea																												FALSE
GCF_002263515.1	NZ_CP022752.1	region024	FALSE	FALSE	TRUE	TRUE	5004085..5015885	FALSE	Bacteria_Actinobacteria_Actinopolysporales_Actinopolysporaceae_Actinopolyspora	Actinopolyspora erythraea																												FALSE
GCF_013408175.1	NZ_JACBYW010000001.1	region005	TRUE	FALSE	FALSE	FALSE	794841..862193	FALSE	Bacteria_Actinobacteria_Actinopolysporales_Actinopolysporaceae_Actinopolyspora	Actinopolyspora biskrensis																												FALSE
GCF_013408175.1	NZ_JACBYW010000001.1	region008	FALSE	FALSE	FALSE	FALSE	1083929..1197065	FALSE	Bacteria_Actinobacteria_Actinopolysporales_Actinopolysporaceae_Actinopolyspora	Actinopolyspora biskrensis																												FALSE
GCF_013408175.1	NZ_JACBYW010000002.1	region002	TRUE	FALSE	FALSE	FALSE	478060..527572	FALSE	Bacteria_Actinobacteria_Actinopolysporales_Actinopolysporaceae_Actinopolyspora	Actinopolyspora biskrensis																												FALSE
GCF_013408175.1	NZ_JACBYW010000003.1	region002	FALSE	FALSE	TRUE	TRUE	525164..550074	FALSE	Bacteria_Actinobacteria_Actinopolysporales_Actinopolysporaceae_Actinopolyspora	Actinopolyspora biskrensis																												FALSE
GCF_013408175.1	NZ_JACBYW010000004.1	region002	FALSE	FALSE	TRUE	TRUE	295946..309386	FALSE	Bacteria_Actinobacteria_Actinopolysporales_Actinopolysporaceae_Actinopolyspora	Actinopolyspora biskrensis																												FALSE
GCF_900100925.1	NZ_FNKO01000002.1	region002	FALSE	FALSE	TRUE	TRUE	868749..880247	FALSE	Bacteria_Actinobacteria_Actinopolysporales_Actinopolysporaceae_Actinopolyspora	Actinopolyspora saharensis																												FALSE
GCF_900100925.1	NZ_FNKO01000002.1	region005	FALSE	FALSE	TRUE	TRUE	1727579..1739385	FALSE	Bacteria_Actinobacteria_Actinopolysporales_Actinopolysporaceae_Actinopolyspora	Actinopolyspora saharensis																												FALSE
GCF_900101095.1	NZ_FNFM01000002.1	region002	FALSE	FALSE	TRUE	TRUE	421222..433022	FALSE	Bacteria_Actinobacteria_Actinopolysporales_Actinopolysporaceae_Actinopolyspora	Actinopolyspora mzabensis																												FALSE
GCF_900101095.1	NZ_FNFM01000003.1	region002	FALSE	FALSE	FALSE	FALSE	216778..328959	FALSE	Bacteria_Actinobacteria_Actinopolysporales_Actinopolysporaceae_Actinopolyspora	Actinopolyspora mzabensis																												FALSE
GCF_900101095.1	NZ_FNFM01000004.1	region001	FALSE	FALSE	FALSE	FALSE	233625..277462	FALSE	Bacteria_Actinobacteria_Actinopolysporales_Actinopolysporaceae_Actinopolyspora	Actinopolyspora mzabensis																												FALSE
GCF_900101095.1	NZ_FNFM01000009.1	region001	FALSE	FALSE	TRUE	TRUE	21373..35404	FALSE	Bacteria_Actinobacteria_Actinopolysporales_Actinopolysporaceae_Actinopolyspora	Actinopolyspora mzabensis																												FALSE
GCF_900101095.1	NZ_FNFM01000012.1	region001	TRUE	FALSE	FALSE	FALSE	20860..82192	FALSE	Bacteria_Actinobacteria_Actinopolysporales_Actinopolysporaceae_Actinopolyspora	Actinopolyspora mzabensis																												FALSE
GCF_900104475.1	NZ_FNJR01000001.1	region002	FALSE	FALSE	TRUE	TRUE	242999..257051	FALSE	Bacteria_Actinobacteria_Actinopolysporales_Actinopolysporaceae_Actinopolyspora	Actinopolyspora xinjiangensis																												FALSE
GCF_900104475.1	NZ_FNJR01000003.1	region003	FALSE	FALSE	FALSE	FALSE	389575..432617	FALSE	Bacteria_Actinobacteria_Actinopolysporales_Actinopolysporaceae_Actinopolyspora	Actinopolyspora xinjiangensis																												FALSE
GCF_900104475.1	NZ_FNJR01000009.1	region002	FALSE	FALSE	TRUE	TRUE	184857..196657	FALSE	Bacteria_Actinobacteria_Actinopolysporales_Actinopolysporaceae_Actinopolyspora	Actinopolyspora xinjiangensis																												FALSE
GCF_900104475.1	NZ_FNJR01000018.1	region001	FALSE	FALSE	FALSE	FALSE	8147..73067	FALSE	Bacteria_Actinobacteria_Actinopolysporales_Actinopolysporaceae_Actinopolyspora	Actinopolyspora xinjiangensis															394.5													FALSE
GCF_900112765.1	NZ_FOMZ01000001.1	region002	TRUE	FALSE	FALSE	FALSE	235461..317550	FALSE	Bacteria_Actinobacteria_Actinopolysporales_Actinopolysporaceae_Actinopolyspora_Actinopolyspora alba group	Actinopolyspora alba																												FALSE
GCF_900112765.1	NZ_FOMZ01000008.1	region001	FALSE	FALSE	TRUE	TRUE	18048..32130	FALSE	Bacteria_Actinobacteria_Actinopolysporales_Actinopolysporaceae_Actinopolyspora_Actinopolyspora alba group	Actinopolyspora alba																												FALSE
GCF_900112765.1	NZ_FOMZ01000014.1	region001	FALSE	FALSE	TRUE	TRUE	96616..108416	FALSE	Bacteria_Actinobacteria_Actinopolysporales_Actinopolysporaceae_Actinopolyspora_Actinopolyspora alba group	Actinopolyspora alba																												FALSE
GCF_900112765.1	NZ_FOMZ01000014.1	region002	TRUE	FALSE	FALSE	FALSE	149842..>175650	TRUE	Bacteria_Actinobacteria_Actinopolysporales_Actinopolysporaceae_Actinopolyspora_Actinopolyspora alba group	Actinopolyspora alba																												FALSE
GCF_900112765.1	NZ_FOMZ01000018.1	region001	TRUE	FALSE	FALSE	FALSE	73951..101191	TRUE	Bacteria_Actinobacteria_Actinopolysporales_Actinopolysporaceae_Actinopolyspora_Actinopolyspora alba group	Actinopolyspora alba																												FALSE
GCF_900112765.1	NZ_FOMZ01000033.1	region001	TRUE	FALSE	FALSE	FALSE	0..2033	TRUE	Bacteria_Actinobacteria_Actinopolysporales_Actinopolysporaceae_Actinopolyspora_Actinopolyspora alba group	Actinopolyspora alba																												FALSE
GCF_900116555.1	NZ_FPAT01000001.1	region004	FALSE	FALSE	FALSE	FALSE	467953..560824	FALSE	Bacteria_Actinobacteria_Actinopolysporales_Actinopolysporaceae_Actinopolyspora_Actinopolyspora alba group	Actinopolyspora righensis																												FALSE
GCF_900116555.1	NZ_FPAT01000001.1	region005	FALSE	FALSE	FALSE	FALSE	599450..681015	FALSE	Bacteria_Actinobacteria_Actinopolysporales_Actinopolysporaceae_Actinopolyspora_Actinopolyspora alba group	Actinopolyspora righensis																												FALSE
GCF_900116555.1	NZ_FPAT01000002.1	region002	FALSE	FALSE	TRUE	TRUE	311002..346515	FALSE	Bacteria_Actinobacteria_Actinopolysporales_Actinopolysporaceae_Actinopolyspora_Actinopolyspora alba group	Actinopolyspora righensis																												FALSE
GCF_900116555.1	NZ_FPAT01000004.1	region002	FALSE	FALSE	TRUE	TRUE	424391..436191	FALSE	Bacteria_Actinobacteria_Actinopolysporales_Actinopolysporaceae_Actinopolyspora_Actinopolyspora alba group	Actinopolyspora righensis																												FALSE
GCF_900116555.1	NZ_FPAT01000010.1	region001	TRUE	FALSE	FALSE	FALSE	60404..142487	FALSE	Bacteria_Actinobacteria_Actinopolysporales_Actinopolysporaceae_Actinopolyspora_Actinopolyspora alba group	Actinopolyspora righensis																												FALSE
GCF_003952945.1	NZ_QXGK01000006.1	region001	TRUE	FALSE	FALSE	FALSE	86650..119261	TRUE	Bacteria_Actinobacteria_Bifidobacteriales_Bifidobacteriaceae_Bifidobacterium	Bifidobacterium samirii																												FALSE
GCF_018283645.1	NZ_JAGSXH010000010.1	region002	TRUE	FALSE	FALSE	FALSE	51796..90777	TRUE	Bacteria_Actinobacteria_Catenulisporales_Actinospicaceae_Actinocrinis	Actinocrinis puniceicyclus																												FALSE
GCF_018283645.1	NZ_JAGSXH010000018.1	region001	TRUE	FALSE	FALSE	FALSE	4559..74925	FALSE	Bacteria_Actinobacteria_Catenulisporales_Actinospicaceae_Actinocrinis	Actinocrinis puniceicyclus																												FALSE
GCF_018283645.1	NZ_JAGSXH010000061.1	region001	FALSE	FALSE	FALSE	FALSE	0..37407	TRUE	Bacteria_Actinobacteria_Catenulisporales_Actinospicaceae_Actinocrinis	Actinocrinis puniceicyclus																												FALSE
GCF_018283645.1	NZ_JAGSXH010000067.1	region001	TRUE	FALSE	FALSE	FALSE	0..33601	TRUE	Bacteria_Actinobacteria_Catenulisporales_Actinospicaceae_Actinocrinis	Actinocrinis puniceicyclus																												FALSE
GCF_018283645.1	NZ_JAGSXH010000083.1	region001	FALSE	FALSE	TRUE	TRUE	16930..26051	TRUE	Bacteria_Actinobacteria_Catenulisporales_Actinospicaceae_Actinocrinis	Actinocrinis puniceicyclus																												FALSE
GCF_018283645.1	NZ_JAGSXH010000111.1	region001	TRUE	FALSE	FALSE	FALSE	0..18689	TRUE	Bacteria_Actinobacteria_Catenulisporales_Actinospicaceae_Actinocrinis	Actinocrinis puniceicyclus																												FALSE
GCF_018283645.1	NZ_JAGSXH010000159.1	region001	TRUE	FALSE	FALSE	FALSE	0..10076	TRUE	Bacteria_Actinobacteria_Catenulisporales_Actinospicaceae_Actinocrinis	Actinocrinis puniceicyclus																												FALSE
GCF_018283645.1	NZ_JAGSXH010000197.1	region001	TRUE	FALSE	FALSE	FALSE	0..6674	TRUE	Bacteria_Actinobacteria_Catenulisporales_Actinospicaceae_Actinocrinis	Actinocrinis puniceicyclus																												FALSE
GCF_018283645.1	NZ_JAGSXH010000248.1	region001	TRUE	FALSE	FALSE	FALSE	0..3223	TRUE	Bacteria_Actinobacteria_Catenulisporales_Actinospicaceae_Actinocrinis	Actinocrinis puniceicyclus																												FALSE
GCF_018283645.1	NZ_JAGSXH010000255.1	region001	TRUE	FALSE	FALSE	FALSE	0..3003	TRUE	Bacteria_Actinobacteria_Catenulisporales_Actinospicaceae_Actinocrinis	Actinocrinis puniceicyclus																												FALSE
GCF_000504285.1	NZ_KI632511.1	region003	TRUE	FALSE	FALSE	FALSE	267091..346940	FALSE	Bacteria_Actinobacteria_Catenulisporales_Actinospicaceae_Actinospica	Actinospica robiniae DSM 44927																												FALSE
GCF_000504285.1	NZ_KI632511.1	region004	FALSE	FALSE	FALSE	FALSE	698665..738236	FALSE	Bacteria_Actinobacteria_Catenulisporales_Actinospicaceae_Actinospica	Actinospica robiniae DSM 44927																												FALSE
GCF_000504285.1	NZ_KI632511.1	region007	FALSE	FALSE	FALSE	FALSE	1666018..1701760	FALSE	Bacteria_Actinobacteria_Catenulisporales_Actinospicaceae_Actinospica	Actinospica robiniae DSM 44927																												FALSE
GCF_000504285.1	NZ_KI632511.1	region008	TRUE	FALSE	FALSE	FALSE	1973590..2053851	FALSE	Bacteria_Actinobacteria_Catenulisporales_Actinospicaceae_Actinospica	Actinospica robiniae DSM 44927																												FALSE
GCF_000504285.1	NZ_KI632511.1	region011	TRUE	FALSE	FALSE	FALSE	3487888..3556841	FALSE	Bacteria_Actinobacteria_Catenulisporales_Actinospicaceae_Actinospica	Actinospica robiniae DSM 44927																												FALSE
GCF_000504285.1	NZ_KI632511.1	region012	TRUE	FALSE	FALSE	FALSE	3608492..3668973	FALSE	Bacteria_Actinobacteria_Catenulisporales_Actinospicaceae_Actinospica	Actinospica robiniae DSM 44927																												FALSE
GCF_000504285.1	NZ_KI632511.1	region013	TRUE	FALSE	FALSE	FALSE	3731821..3801241	FALSE	Bacteria_Actinobacteria_Catenulisporales_Actinospicaceae_Actinospica	Actinospica robiniae DSM 44927																												FALSE
GCF_000504285.1	NZ_KI632511.1	region016	FALSE	FALSE	TRUE	TRUE	5056971..5072835	FALSE	Bacteria_Actinobacteria_Catenulisporales_Actinospicaceae_Actinospica	Actinospica robiniae DSM 44927																												FALSE
GCF_018139695.1	NZ_JAGSOG010000004.1	region001	TRUE	FALSE	FALSE	FALSE	25025..100376	TRUE	Bacteria_Actinobacteria_Catenulisporales_Actinospicaceae_Actinospica	Actinospica durhamensis																												FALSE
GCF_018139695.1	NZ_JAGSOG010000012.1	region001	TRUE	FALSE	FALSE	FALSE	550..71041	TRUE	Bacteria_Actinobacteria_Catenulisporales_Actinospicaceae_Actinospica	Actinospica durhamensis																												FALSE
GCF_018139695.1	NZ_JAGSOG010000033.1	region001	FALSE	FALSE	FALSE	FALSE	0..35631	TRUE	Bacteria_Actinobacteria_Catenulisporales_Actinospicaceae_Actinospica	Actinospica durhamensis																												FALSE
GCF_018139695.1	NZ_JAGSOG010000053.1	region001	FALSE	FALSE	FALSE	FALSE	0..23018	TRUE	Bacteria_Actinobacteria_Catenulisporales_Actinospicaceae_Actinospica	Actinospica durhamensis																												FALSE
GCF_018139695.1	NZ_JAGSOG010000070.1	region001	FALSE	FALSE	TRUE	TRUE	0..14329	TRUE	Bacteria_Actinobacteria_Catenulisporales_Actinospicaceae_Actinospica	Actinospica durhamensis																												FALSE
GCF_018139695.1	NZ_JAGSOG010000074.1	region001	TRUE	FALSE	FALSE	FALSE	0..33964	TRUE	Bacteria_Actinobacteria_Catenulisporales_Actinospicaceae_Actinospica	Actinospica durhamensis																												FALSE
GCF_014639795.1	NZ_BMGC01000030.1	region001	TRUE	TRUE	FALSE	TRUE	1527..48968	TRUE	Bacteria_Actinobacteria_Corynebacteriales_Gordoniaceae_Gordonia	Gordonia jinhuaensis	519.6					499.7																				63		FALSE
GCF_000024025.1	NC_013131.1	region002	FALSE	FALSE	TRUE	TRUE	2046751..2060938	FALSE	Bacteria_Actinobacteria_Catenulisporales_Catenulisporaceae_Catenulispora	Catenulispora acidiphila DSM 44928																												FALSE
GCF_000024025.1	NC_013131.1	region005	TRUE	FALSE	FALSE	FALSE	2913419..3004771	FALSE	Bacteria_Actinobacteria_Catenulisporales_Catenulisporaceae_Catenulispora	Catenulispora acidiphila DSM 44928																												FALSE
GCF_000024025.1	NC_013131.1	region007	TRUE	FALSE	FALSE	FALSE	3754022..3885998	FALSE	Bacteria_Actinobacteria_Catenulisporales_Catenulisporaceae_Catenulispora	Catenulispora acidiphila DSM 44928																												FALSE
GCF_000024025.1	NC_013131.1	region014	FALSE	FALSE	TRUE	TRUE	4864366..4876160	FALSE	Bacteria_Actinobacteria_Catenulisporales_Catenulisporaceae_Catenulispora	Catenulispora acidiphila DSM 44928																												FALSE
GCF_000024025.1	NC_013131.1	region017	TRUE	FALSE	FALSE	FALSE	5791246..5851457	FALSE	Bacteria_Actinobacteria_Catenulisporales_Catenulisporaceae_Catenulispora	Catenulispora acidiphila DSM 44928																												FALSE
GCF_000024025.1	NC_013131.1	region019	TRUE	FALSE	FALSE	FALSE	7212282..7256317	FALSE	Bacteria_Actinobacteria_Catenulisporales_Catenulisporaceae_Catenulispora	Catenulispora acidiphila DSM 44928																												FALSE
GCF_015356825.1	NZ_JAACYW010000008.1	region001	TRUE	FALSE	FALSE	FALSE	2242..71754	FALSE	Bacteria_Actinobacteria_Catenulisporales_Catenulisporaceae_Catenulispora	Catenulispora rubra																												FALSE
GCF_015356825.1	NZ_JAACYW010000010.1	region001	TRUE	FALSE	FALSE	FALSE	1290..51214	FALSE	Bacteria_Actinobacteria_Catenulisporales_Catenulisporaceae_Catenulispora	Catenulispora rubra																												FALSE
GCF_015356825.1	NZ_JAACYW010000010.1	region002	TRUE	FALSE	FALSE	FALSE	64853..87173	TRUE	Bacteria_Actinobacteria_Catenulisporales_Catenulisporaceae_Catenulispora	Catenulispora rubra																												FALSE
GCF_015356825.1	NZ_JAACYW010000011.1	region001	TRUE	FALSE	FALSE	FALSE	27946..84998	TRUE	Bacteria_Actinobacteria_Catenulisporales_Catenulisporaceae_Catenulispora	Catenulispora rubra																												FALSE
GCF_015356825.1	NZ_JAACYW010000013.1	region001	FALSE	FALSE	FALSE	FALSE	14595..62305	FALSE	Bacteria_Actinobacteria_Catenulisporales_Catenulisporaceae_Catenulispora	Catenulispora rubra																												FALSE
GCF_015356825.1	NZ_JAACYW010000016.1	region001	TRUE	FALSE	FALSE	FALSE	23926..79432	FALSE	Bacteria_Actinobacteria_Catenulisporales_Catenulisporaceae_Catenulispora	Catenulispora rubra																												FALSE
GCF_015356825.1	NZ_JAACYW010000061.1	region001	TRUE	FALSE	FALSE	FALSE	0..24703	TRUE	Bacteria_Actinobacteria_Catenulisporales_Catenulisporaceae_Catenulispora	Catenulispora rubra																												FALSE
GCF_015356825.1	NZ_JAACYW010000068.1	region001	TRUE	FALSE	FALSE	FALSE	0..44796	TRUE	Bacteria_Actinobacteria_Catenulisporales_Catenulisporaceae_Catenulispora	Catenulispora rubra																												FALSE
GCF_015356825.1	NZ_JAACYW010000086.1	region001	FALSE	FALSE	TRUE	TRUE	8025..23551	FALSE	Bacteria_Actinobacteria_Catenulisporales_Catenulisporaceae_Catenulispora	Catenulispora rubra																												FALSE
GCF_015356825.1	NZ_JAACYW010000092.1	region001	TRUE	FALSE	FALSE	FALSE	0..36911	TRUE	Bacteria_Actinobacteria_Catenulisporales_Catenulisporaceae_Catenulispora	Catenulispora rubra																												FALSE
GCF_015356825.1	NZ_JAACYW010000095.1	region001	TRUE	FALSE	FALSE	FALSE	0..36574	TRUE	Bacteria_Actinobacteria_Catenulisporales_Catenulisporaceae_Catenulispora	Catenulispora rubra																												FALSE
GCF_015356825.1	NZ_JAACYW010000101.1	region001	TRUE	FALSE	FALSE	FALSE	0..35229	TRUE	Bacteria_Actinobacteria_Catenulisporales_Catenulisporaceae_Catenulispora	Catenulispora rubra																												FALSE
GCF_015356825.1	NZ_JAACYW010000122.1	region001	FALSE	FALSE	TRUE	TRUE	0..7935	TRUE	Bacteria_Actinobacteria_Catenulisporales_Catenulisporaceae_Catenulispora	Catenulispora rubra																										100.8	257.2	TRUE
GCF_015356825.1	NZ_JAACYW010000161.1	region001	TRUE	FALSE	FALSE	FALSE	0..25619	TRUE	Bacteria_Actinobacteria_Catenulisporales_Catenulisporaceae_Catenulispora	Catenulispora rubra																												FALSE
GCF_015356825.1	NZ_JAACYW010000231.1	region001	FALSE	FALSE	TRUE	TRUE	0..6679	TRUE	Bacteria_Actinobacteria_Catenulisporales_Catenulisporaceae_Catenulispora	Catenulispora rubra																												FALSE
GCF_015356825.1	NZ_JAACYW010000334.1	region001	TRUE	FALSE	FALSE	FALSE	0..12083	TRUE	Bacteria_Actinobacteria_Catenulisporales_Catenulisporaceae_Catenulispora	Catenulispora rubra																												FALSE
GCF_015356865.1	NZ_JAAFZA010000004.1	region001	TRUE	FALSE	FALSE	FALSE	76278..127088	TRUE	Bacteria_Actinobacteria_Catenulisporales_Catenulisporaceae_Catenulispora	Catenulispora pinisilvae																												FALSE
GCF_015356865.1	NZ_JAAFZA010000007.1	region001	TRUE	FALSE	FALSE	FALSE	17423..94728	FALSE	Bacteria_Actinobacteria_Catenulisporales_Catenulisporaceae_Catenulispora	Catenulispora pinisilvae																												FALSE
GCF_015356865.1	NZ_JAAFZA010000014.1	region001	TRUE	FALSE	FALSE	FALSE	0..78203	TRUE	Bacteria_Actinobacteria_Catenulisporales_Catenulisporaceae_Catenulispora	Catenulispora pinisilvae																												FALSE
GCF_015356865.1	NZ_JAAFZA010000015.1	region001	FALSE	FALSE	FALSE	FALSE	0..31438	TRUE	Bacteria_Actinobacteria_Catenulisporales_Catenulisporaceae_Catenulispora	Catenulispora pinisilvae																												FALSE
GCF_015356865.1	NZ_JAAFZA010000027.1	region001	TRUE	FALSE	FALSE	FALSE	0..40107	TRUE	Bacteria_Actinobacteria_Catenulisporales_Catenulisporaceae_Catenulispora	Catenulispora pinisilvae																												FALSE
GCF_015356865.1	NZ_JAAFZA010000070.1	region001	TRUE	FALSE	FALSE	FALSE	8279..44021	TRUE	Bacteria_Actinobacteria_Catenulisporales_Catenulisporaceae_Catenulispora	Catenulispora pinisilvae																												FALSE
GCF_015356865.1	NZ_JAAFZA010000074.1	region001	TRUE	FALSE	FALSE	FALSE	0..42626	TRUE	Bacteria_Actinobacteria_Catenulisporales_Catenulisporaceae_Catenulispora	Catenulispora pinisilvae																												FALSE
GCF_015356865.1	NZ_JAAFZA010000110.1	region001	TRUE	FALSE	FALSE	FALSE	0..26859	TRUE	Bacteria_Actinobacteria_Catenulisporales_Catenulisporaceae_Catenulispora	Catenulispora pinisilvae																												FALSE
GCF_015356865.1	NZ_JAAFZA010000117.1	region001	TRUE	FALSE	FALSE	FALSE	5886..31246	TRUE	Bacteria_Actinobacteria_Catenulisporales_Catenulisporaceae_Catenulispora	Catenulispora pinisilvae																												FALSE
GCF_015356865.1	NZ_JAAFZA010000126.1	region001	TRUE	FALSE	FALSE	FALSE	0..29444	TRUE	Bacteria_Actinobacteria_Catenulisporales_Catenulisporaceae_Catenulispora	Catenulispora pinisilvae																												FALSE
GCF_015356865.1	NZ_JAAFZA010000135.1	region001	TRUE	FALSE	FALSE	FALSE	0..27480	TRUE	Bacteria_Actinobacteria_Catenulisporales_Catenulisporaceae_Catenulispora	Catenulispora pinisilvae																												FALSE
GCF_015356865.1	NZ_JAAFZA010000145.1	region001	FALSE	FALSE	TRUE	TRUE	4223..19734	FALSE	Bacteria_Actinobacteria_Catenulisporales_Catenulisporaceae_Catenulispora	Catenulispora pinisilvae																												FALSE
GCF_015356865.1	NZ_JAAFZA010000155.1	region001	FALSE	FALSE	TRUE	TRUE	15867..24778	TRUE	Bacteria_Actinobacteria_Catenulisporales_Catenulisporaceae_Catenulispora	Catenulispora pinisilvae																												FALSE
GCF_015356865.1	NZ_JAAFZA010000158.1	region001	TRUE	FALSE	FALSE	FALSE	0..24473	TRUE	Bacteria_Actinobacteria_Catenulisporales_Catenulisporaceae_Catenulispora	Catenulispora pinisilvae																												FALSE
GCF_015356865.1	NZ_JAAFZA010000228.1	region001	FALSE	FALSE	FALSE	FALSE	0..16613	TRUE	Bacteria_Actinobacteria_Catenulisporales_Catenulisporaceae_Catenulispora	Catenulispora pinisilvae																												FALSE
GCF_015356865.1	NZ_JAAFZA010000381.1	region001	TRUE	FALSE	FALSE	FALSE	0..6860	TRUE	Bacteria_Actinobacteria_Catenulisporales_Catenulisporaceae_Catenulispora	Catenulispora pinisilvae																												FALSE
GCF_015356865.1	NZ_JAAFZA010000434.1	region001	TRUE	FALSE	FALSE	FALSE	0..4095	TRUE	Bacteria_Actinobacteria_Catenulisporales_Catenulisporaceae_Catenulispora	Catenulispora pinisilvae																												FALSE
GCF_015356865.1	NZ_JAAFZA010000438.1	region001	TRUE	FALSE	FALSE	FALSE	0..3969	TRUE	Bacteria_Actinobacteria_Catenulisporales_Catenulisporaceae_Catenulispora	Catenulispora pinisilvae																												FALSE
GCF_015356865.1	NZ_JAAFZA010000444.1	region001	TRUE	FALSE	FALSE	FALSE	0..3625	TRUE	Bacteria_Actinobacteria_Catenulisporales_Catenulisporaceae_Catenulispora	Catenulispora pinisilvae																												FALSE
GCF_015356865.1	NZ_JAAFZA010000453.1	region001	TRUE	FALSE	FALSE	FALSE	0..3137	TRUE	Bacteria_Actinobacteria_Catenulisporales_Catenulisporaceae_Catenulispora	Catenulispora pinisilvae																												FALSE
GCF_018274385.1	NZ_JAAFYZ010000001.1	region001	TRUE	FALSE	FALSE	FALSE	5264..189359	TRUE	Bacteria_Actinobacteria_Catenulisporales_Catenulisporaceae_Catenulispora	Catenulispora pinistramenti																												FALSE
GCF_018274385.1	NZ_JAAFYZ010000017.1	region001	TRUE	FALSE	FALSE	FALSE	32375..81797	TRUE	Bacteria_Actinobacteria_Catenulisporales_Catenulisporaceae_Catenulispora	Catenulispora pinistramenti																												FALSE
GCF_018274385.1	NZ_JAAFYZ010000023.1	region001	FALSE	FALSE	FALSE	FALSE	43626..>74835	TRUE	Bacteria_Actinobacteria_Catenulisporales_Catenulisporaceae_Catenulispora	Catenulispora pinistramenti																												FALSE
GCF_018274385.1	NZ_JAAFYZ010000033.1	region001	TRUE	FALSE	FALSE	FALSE	26534..64468	TRUE	Bacteria_Actinobacteria_Catenulisporales_Catenulisporaceae_Catenulispora	Catenulispora pinistramenti																												FALSE
GCF_018274385.1	NZ_JAAFYZ010000034.1	region001	TRUE	FALSE	FALSE	FALSE	26485..63360	TRUE	Bacteria_Actinobacteria_Catenulisporales_Catenulisporaceae_Catenulispora	Catenulispora pinistramenti																												FALSE
GCF_018274385.1	NZ_JAAFYZ010000036.1	region001	TRUE	FALSE	FALSE	FALSE	0..61664	TRUE	Bacteria_Actinobacteria_Catenulisporales_Catenulisporaceae_Catenulispora	Catenulispora pinistramenti																												FALSE
GCF_018274385.1	NZ_JAAFYZ010000039.1	region001	TRUE	FALSE	FALSE	FALSE	30868..60451	TRUE	Bacteria_Actinobacteria_Catenulisporales_Catenulisporaceae_Catenulispora	Catenulispora pinistramenti																												FALSE
GCF_018274385.1	NZ_JAAFYZ010000042.1	region001	TRUE	FALSE	FALSE	FALSE	21151..59863	TRUE	Bacteria_Actinobacteria_Catenulisporales_Catenulisporaceae_Catenulispora	Catenulispora pinistramenti																												FALSE
GCF_018274385.1	NZ_JAAFYZ010000043.1	region001	TRUE	FALSE	FALSE	FALSE	35606..59663	TRUE	Bacteria_Actinobacteria_Catenulisporales_Catenulisporaceae_Catenulispora	Catenulispora pinistramenti																												FALSE
GCF_018274385.1	NZ_JAAFYZ010000050.1	region001	FALSE	FALSE	FALSE	FALSE	19102..55193	TRUE	Bacteria_Actinobacteria_Catenulisporales_Catenulisporaceae_Catenulispora	Catenulispora pinistramenti																												FALSE
GCF_018274385.1	NZ_JAAFYZ010000051.1	region001	FALSE	FALSE	FALSE	FALSE	20760..55140	TRUE	Bacteria_Actinobacteria_Catenulisporales_Catenulisporaceae_Catenulispora	Catenulispora pinistramenti																												FALSE
GCF_018274385.1	NZ_JAAFYZ010000071.1	region001	TRUE	FALSE	FALSE	FALSE	0..42951	TRUE	Bacteria_Actinobacteria_Catenulisporales_Catenulisporaceae_Catenulispora	Catenulispora pinistramenti																												FALSE
GCF_018274385.1	NZ_JAAFYZ010000072.1	region001	FALSE	FALSE	TRUE	TRUE	23079..34876	FALSE	Bacteria_Actinobacteria_Catenulisporales_Catenulisporaceae_Catenulispora	Catenulispora pinistramenti																												FALSE
GCF_018274385.1	NZ_JAAFYZ010000092.1	region001	FALSE	FALSE	TRUE	TRUE	5111..20679	FALSE	Bacteria_Actinobacteria_Catenulisporales_Catenulisporaceae_Catenulispora	Catenulispora pinistramenti																												FALSE
GCF_018274385.1	NZ_JAAFYZ010000107.1	region001	FALSE	FALSE	FALSE	FALSE	4215..33072	TRUE	Bacteria_Actinobacteria_Catenulisporales_Catenulisporaceae_Catenulispora	Catenulispora pinistramenti																												FALSE
GCF_018274385.1	NZ_JAAFYZ010000150.1	region001	TRUE	FALSE	FALSE	FALSE	0..26708	TRUE	Bacteria_Actinobacteria_Catenulisporales_Catenulisporaceae_Catenulispora	Catenulispora pinistramenti																												FALSE
GCF_018274385.1	NZ_JAAFYZ010000171.1	region001	TRUE	FALSE	FALSE	FALSE	0..24211	TRUE	Bacteria_Actinobacteria_Catenulisporales_Catenulisporaceae_Catenulispora	Catenulispora pinistramenti																												FALSE
GCF_018274385.1	NZ_JAAFYZ010000217.1	region001	TRUE	FALSE	FALSE	FALSE	0..18552	TRUE	Bacteria_Actinobacteria_Catenulisporales_Catenulisporaceae_Catenulispora	Catenulispora pinistramenti																												FALSE
GCF_018274385.1	NZ_JAAFYZ010000331.1	region001	FALSE	FALSE	FALSE	FALSE	0..8178	TRUE	Bacteria_Actinobacteria_Catenulisporales_Catenulisporaceae_Catenulispora	Catenulispora pinistramenti																												FALSE
GCF_018274385.1	NZ_JAAFYZ010000462.1	region001	TRUE	FALSE	FALSE	FALSE	0..1765	TRUE	Bacteria_Actinobacteria_Catenulisporales_Catenulisporaceae_Catenulispora	Catenulispora pinistramenti																												FALSE
GCF_000478885.1	NC_022567.1	region001	TRUE	FALSE	FALSE	FALSE	65578..118666	FALSE	Bacteria_Actinobacteria_Coriobacteriia_Eggerthellales_Eggerthellaceae_Adlercreutzia	Adlercreutzia equolifaciens DSM 19450																												FALSE
GCF_011405655.1	NZ_AP022829.1	region001	TRUE	FALSE	FALSE	FALSE	235962..290259	FALSE	Bacteria_Actinobacteria_Coriobacteriia_Eggerthellales_Eggerthellaceae_Adlercreutzia	Adlercreutzia hattorii																												FALSE
GCF_001643775.1	NZ_CP011402.1	region001	TRUE	FALSE	FALSE	FALSE	907869..958557	FALSE	Bacteria_Actinobacteria_Coriobacteriia_Eggerthellales_Eggerthellaceae_Denitrobacterium	Denitrobacterium detoxificans																												FALSE
GCF_001643775.1	NZ_CP011402.1	region002	TRUE	FALSE	FALSE	FALSE	1102438..1152767	FALSE	Bacteria_Actinobacteria_Coriobacteriia_Eggerthellales_Eggerthellaceae_Denitrobacterium	Denitrobacterium detoxificans																												FALSE
GCF_002159895.1	NZ_NFJN01000024.1	region001	TRUE	FALSE	FALSE	FALSE	0..25641	TRUE	Bacteria_Actinobacteria_Coriobacteriia_Eggerthellales_Eggerthellaceae_Gordonibacter	Gordonibacter urolithinfaciens																												FALSE
GCF_002159895.1	NZ_NFJN01000053.1	region001	TRUE	FALSE	FALSE	FALSE	0..3259	TRUE	Bacteria_Actinobacteria_Coriobacteriia_Eggerthellales_Eggerthellaceae_Gordonibacter	Gordonibacter urolithinfaciens																												FALSE
GCF_002159895.1	NZ_NFJN01000060.1	region001	TRUE	FALSE	FALSE	FALSE	0..1135	TRUE	Bacteria_Actinobacteria_Coriobacteriia_Eggerthellales_Eggerthellaceae_Gordonibacter	Gordonibacter urolithinfaciens																												FALSE
GCF_003726035.1	NZ_QICD01000001.1	region001	TRUE	FALSE	FALSE	FALSE	163530..211039	FALSE	Bacteria_Actinobacteria_Coriobacteriia_Eggerthellales_Eggerthellaceae_Paraeggerthella	Paraeggerthella hongkongensis																												FALSE
GCF_022845715.1	NZ_AP025564.1	region002	TRUE	FALSE	FALSE	FALSE	793879..843008	FALSE	Bacteria_Actinobacteria_Coriobacteriia_Eggerthellales_Eggerthellaceae_Raoultibacter	Raoultibacter timonensis																												FALSE
GCF_900450505.1	NZ_UGGM01000001.1	region001	TRUE	FALSE	FALSE	FALSE	388351..431717	FALSE	Bacteria_Actinobacteria_Coriobacteriia_Eggerthellales_Eggerthellaceae_Slackia	Slackia exigua																												FALSE
GCF_900637575.1	NZ_LR134379.1	region002	FALSE	FALSE	FALSE	FALSE	2504295..2547109	FALSE	Bacteria_Actinobacteria_Coriobacteriia_Eggerthellales_Eggerthellaceae_Slackia	Slackia heliotrinireducens																												FALSE
GCF_014673215.1	NZ_JACWMS010000002.1	region003	TRUE	TRUE	FALSE	TRUE	491881..573173	FALSE	Bacteria_Actinobacteria_Corynebacteriales_Gordoniaceae_Gordonia	Gordonia hankookensis	540.5				674.9	521.7																				58.7	310.8	TRUE
GCF_000022905.1	NC_010813.1	region001	FALSE	FALSE	FALSE	FALSE	0..29037	TRUE	Bacteria_Actinobacteria_Corynebacteriales_Corynebacteriaceae_Corynebacterium	Corynebacterium aurimucosum ATCC 700975																												FALSE
GCF_000022905.1	NC_012590.1	region001	FALSE	FALSE	FALSE	FALSE	27078..69245	FALSE	Bacteria_Actinobacteria_Corynebacteriales_Corynebacteriaceae_Corynebacterium	Corynebacterium aurimucosum ATCC 700975																												FALSE
GCF_020735545.1	NZ_CP085974.1	region010	TRUE	TRUE	FALSE	TRUE	4751480..4821566	FALSE	Bacteria_Actinobacteria_Corynebacteriales_Gordoniaceae_Gordonia	Gordonia otitidis	524		377.4	264.3																						84.5		FALSE
GCF_000175375.1	NZ_ACSH02000002.1	region001	FALSE	FALSE	TRUE	TRUE	65565..78322	FALSE	Bacteria_Actinobacteria_Corynebacteriales_Corynebacteriaceae_Corynebacterium	Corynebacterium matruchotii ATCC 14266																											27.9	FALSE
GCF_022059885.1	NZ_CP091855.1	region006	TRUE	TRUE	TRUE	TRUE	1197095..1263029	FALSE	Bacteria_Actinobacteria_Corynebacteriales_Gordoniaceae_Gordonia	Gordonia amicalis						532.6																				75.2		FALSE
GCF_000177535.2	NC_015673.1	region002	FALSE	FALSE	TRUE	TRUE	533909..547830	FALSE	Bacteria_Actinobacteria_Corynebacteriales_Corynebacteriaceae_Corynebacterium	Corynebacterium resistens DSM 45100																												FALSE
GCF_000296405.1	NZ_JH815195.1	region001	FALSE	FALSE	TRUE	TRUE	311626..324915	FALSE	Bacteria_Actinobacteria_Corynebacteriales_Corynebacteriaceae_Corynebacterium	Corynebacterium otitidis ATCC 51513																										66.9	260.5	TRUE
GCF_000312345.1	NZ_HE998585.1	region003	FALSE	FALSE	TRUE	TRUE	534746..547098	FALSE	Bacteria_Actinobacteria_Corynebacteriales_Corynebacteriaceae_Corynebacterium	Corynebacterium timonense 5401744																										74	257.6	TRUE
GCF_023078355.1	NZ_CP095552.1	region002	TRUE	TRUE	TRUE	TRUE	654877..714325	FALSE	Bacteria_Actinobacteria_Corynebacteriales_Gordoniaceae_Gordonia	Gordonia hongkongensis						543.2																				76.5		FALSE
GCF_000341345.1	NC_020302.1	region001	FALSE	FALSE	TRUE	TRUE	533663..546090	FALSE	Bacteria_Actinobacteria_Corynebacteriales_Corynebacteriaceae_Corynebacterium	Corynebacterium halotolerans YIM 70093 = DSM 44683																												FALSE
GCF_000372385.1	NZ_AQUW01000002.1	region001	TRUE	FALSE	FALSE	FALSE	79920..139359	FALSE	Bacteria_Actinobacteria_Corynebacteriales_Corynebacteriaceae_Corynebacterium	Corynebacterium ciconiae DSM 44920																												FALSE
GCF_900105725.1	NZ_FNLM01000034.1	region006	TRUE	TRUE	TRUE	TRUE	3313119..3375442	FALSE	Bacteria_Actinobacteria_Corynebacteriales_Gordoniaceae_Gordonia	Gordonia westfalica						521.8																				75.9		FALSE
GCF_000375365.1	NZ_AQXB01000007.1	region001	TRUE	FALSE	FALSE	FALSE	0..43114	TRUE	Bacteria_Actinobacteria_Corynebacteriales_Corynebacteriaceae_Corynebacterium	Corynebacterium mastitidis DSM 44356																												FALSE
GCF_900683595.1	NZ_CAACYD010000007.1	region004	TRUE	TRUE	TRUE	TRUE	370271..431238	FALSE	Bacteria_Actinobacteria_Corynebacteriales_Gordoniaceae_Gordonia	Gordonia paraffinivorans						523.4																				71.5		FALSE
GCF_000590555.1	NC_022198.1	region003	TRUE	FALSE	FALSE	FALSE	1488185..1556508	FALSE	Bacteria_Actinobacteria_Corynebacteriales_Corynebacteriaceae_Corynebacterium	Corynebacterium argentoratense DSM 44202																												FALSE
GCF_901542405.1	NZ_CABEIC010000002.1	region002	TRUE	TRUE	TRUE	TRUE	686338..745745	FALSE	Bacteria_Actinobacteria_Corynebacteriales_Gordoniaceae_Gordonia	Gordonia terrae						545.7																				75.5		FALSE
GCF_000732945.1	NZ_CP008944.1	region001	FALSE	FALSE	TRUE	TRUE	430956..443431	FALSE	Bacteria_Actinobacteria_Corynebacteriales_Corynebacteriaceae_Corynebacterium	Corynebacterium atypicum																										83		FALSE
GCF_000759055.1	NZ_JRNG01000051.1	region001	TRUE	FALSE	FALSE	FALSE	0..20612	TRUE	Bacteria_Actinobacteria_Corynebacteriales_Corynebacteriaceae_Corynebacterium	Corynebacterium tuscaniense DNF00037																												FALSE
GCF_000767255.1	NZ_JRVJ01000004.1	region001	FALSE	FALSE	TRUE	TRUE	193217..205650	FALSE	Bacteria_Actinobacteria_Corynebacteriales_Corynebacteriaceae_Corynebacterium	Corynebacterium auriscanis																										81.7	273.1	TRUE
GCF_000767255.1	NZ_JRVJ01000010.1	region001	FALSE	FALSE	FALSE	FALSE	167205..211199	FALSE	Bacteria_Actinobacteria_Corynebacteriales_Corynebacteriaceae_Corynebacterium	Corynebacterium auriscanis																												FALSE
GCF_000769635.1	NZ_CP009716.1	region003	FALSE	FALSE	TRUE	TRUE	1145871..1159258	FALSE	Bacteria_Actinobacteria_Corynebacteriales_Corynebacteriaceae_Corynebacterium	Corynebacterium ulcerans																										78.2	260.3	TRUE
GCF_000833575.1	NZ_CP010827.1	region002	TRUE	FALSE	FALSE	FALSE	216907..272255	FALSE	Bacteria_Actinobacteria_Corynebacteriales_Corynebacteriaceae_Corynebacterium	Corynebacterium singulare																												FALSE
GCF_000980815.1	NZ_CP011311.1	region002	FALSE	FALSE	TRUE	TRUE	360589..373016	FALSE	Bacteria_Actinobacteria_Corynebacteriales_Corynebacteriaceae_Corynebacterium	Corynebacterium camporealensis																												FALSE
GCF_000980835.1	NZ_CP011312.1	region001	FALSE	FALSE	FALSE	FALSE	0..41828	TRUE	Bacteria_Actinobacteria_Corynebacteriales_Corynebacteriaceae_Corynebacterium	Corynebacterium kutscheri																												FALSE
GCF_001020985.1	NZ_CP011542.1	region001	FALSE	FALSE	TRUE	TRUE	126637..139370	FALSE	Bacteria_Actinobacteria_Corynebacteriales_Corynebacteriaceae_Corynebacterium	Corynebacterium mustelae																											32.1	FALSE
GCF_001263755.1	NZ_CP012342.1	region003	FALSE	FALSE	FALSE	FALSE	2443421..2487315	FALSE	Bacteria_Actinobacteria_Corynebacteriales_Corynebacteriaceae_Corynebacterium	Corynebacterium riegelii																												FALSE
GCF_001552615.1	NZ_BCRN01000003.1	region001	TRUE	TRUE	FALSE	TRUE	122806..190625	FALSE	Bacteria_Actinobacteria_Corynebacteriales_Gordoniaceae_Millisia	Millisia brevis NBRC 105863	492.2		411.9	332.5																						79.5	304.2	TRUE
GCF_001552615.1	NZ_BCRN01000004.1	region001	TRUE	TRUE	FALSE	TRUE	336146..384962	TRUE	Bacteria_Actinobacteria_Corynebacteriales_Gordoniaceae_Millisia	Millisia brevis NBRC 105863					508.3	514.1																						FALSE
GCF_001412085.1	NZ_LKEV01000010.1	region001	TRUE	FALSE	FALSE	FALSE	0..27474	TRUE	Bacteria_Actinobacteria_Corynebacteriales_Corynebacteriaceae_Corynebacterium	Corynebacterium lowii																												FALSE
GCF_001412105.1	NZ_LKST01000003.1	region001	TRUE	FALSE	FALSE	FALSE	2805..54958	FALSE	Bacteria_Actinobacteria_Corynebacteriales_Corynebacteriaceae_Corynebacterium	Corynebacterium oculi																												FALSE
GCF_001552615.1	NZ_BCRN01000024.1	region001	TRUE	TRUE	FALSE	TRUE	0..31190	TRUE	Bacteria_Actinobacteria_Corynebacteriales_Gordoniaceae_Millisia	Millisia brevis NBRC 105863	549.5																											FALSE
GCF_001586235.1	NZ_CP014635.1	region001	TRUE	FALSE	FALSE	FALSE	772107..815161	FALSE	Bacteria_Actinobacteria_Corynebacteriales_Corynebacteriaceae_Corynebacterium	Corynebacterium simulans																												FALSE
GCF_001865765.1	NZ_CP016826.1	region004	FALSE	FALSE	TRUE	TRUE	1023992..1037382	FALSE	Bacteria_Actinobacteria_Corynebacteriales_Corynebacteriaceae_Corynebacterium	Corynebacterium pseudotuberculosis																										79.9	254.8	TRUE
GCF_001941445.1	NZ_CP009245.1	region001	FALSE	FALSE	FALSE	FALSE	<77981..119207	FALSE	Bacteria_Actinobacteria_Corynebacteriales_Corynebacteriaceae_Corynebacterium	Corynebacterium aquilae DSM 44791																												FALSE
GCF_001941445.1	NZ_CP009245.1	region002	FALSE	FALSE	FALSE	FALSE	1007416..1050186	FALSE	Bacteria_Actinobacteria_Corynebacteriales_Corynebacteriaceae_Corynebacterium	Corynebacterium aquilae DSM 44791			332.3	244.6																								FALSE
GCF_019285775.1	NZ_CP079105.1	region014	TRUE	TRUE	FALSE	TRUE	4070775..4134740	FALSE	Bacteria_Actinobacteria_Corynebacteriales_Gordoniaceae_Skermania	Skermania piniformis	529.8																									86	296.1	TRUE
GCF_000214175.1	NC_015564.1	region001	TRUE	TRUE	FALSE	TRUE	89267..179782	FALSE	Bacteria_Actinobacteria_Corynebacteriales_Mycobacteriaceae_Hoyosella	Hoyosella subflava DQS3-9A1	551.5		418.7	326.6																						69.9	306.9	TRUE
GCF_002162115.1	NZ_CP021417.1	region002	FALSE	FALSE	TRUE	TRUE	1226085..1239472	FALSE	Bacteria_Actinobacteria_Corynebacteriales_Corynebacteriaceae_Corynebacterium	Corynebacterium silvaticum																										78.5	261.1	TRUE
GCF_002287505.1	NZ_CP019688.1	region003	FALSE	FALSE	FALSE	FALSE	2028860..2071982	FALSE	Bacteria_Actinobacteria_Corynebacteriales_Corynebacteriaceae_Corynebacterium	Corynebacterium glaucum																												FALSE
GCF_002843135.1	NZ_CP025209.1	region001	FALSE	FALSE	TRUE	TRUE	496866..510190	FALSE	Bacteria_Actinobacteria_Corynebacteriales_Corynebacteriaceae_Corynebacterium	Corynebacterium diphtheriae bv. mitis str. ISS 3319																										80.4	257.3	TRUE
GCF_002843135.1	NZ_CP025209.1	region004	TRUE	FALSE	FALSE	FALSE	2017763..2073111	FALSE	Bacteria_Actinobacteria_Corynebacteriales_Corynebacteriaceae_Corynebacterium	Corynebacterium diphtheriae bv. mitis str. ISS 3319																												FALSE
GCF_001653095.1	NZ_BDDI01000025.1	region001	TRUE	TRUE	FALSE	TRUE	0..42522	TRUE	Bacteria_Actinobacteria_Corynebacteriales_Mycobacteriaceae_Hoyosella	Hoyosella altamirensis	554.3		424.4	325.2																						68.1	307.1	TRUE
GCF_003070865.1	NZ_CP026948.1	region004	FALSE	FALSE	TRUE	TRUE	1664991..1678381	FALSE	Bacteria_Actinobacteria_Corynebacteriales_Corynebacteriaceae_Corynebacterium	Corynebacterium liangguodongii																										60	252.1	TRUE
GCF_003313035.1	NZ_QHCV01000047.1	region001	FALSE	FALSE	TRUE	TRUE	7705..18096	TRUE	Bacteria_Actinobacteria_Corynebacteriales_Corynebacteriaceae_Corynebacterium	Corynebacterium heidelbergense																											237.8	FALSE
GCF_008312885.1	NZ_VSSO01000001.1	region001	TRUE	TRUE	FALSE	TRUE	307434..365706	FALSE	Bacteria_Actinobacteria_Corynebacteriales_Mycobacteriaceae_Hoyosella	Hoyosella suaedae	564.4																											FALSE
GCF_014643175.1	NZ_BMJH01000001.1	region001	TRUE	TRUE	FALSE	TRUE	168269..231809	FALSE	Bacteria_Actinobacteria_Corynebacteriales_Mycobacteriaceae_Hoyosella	Hoyosella rhizosphaerae	564.7		421.1	331.4																						83.7	307.4	TRUE
GCF_003932295.1	NZ_PQNX01000004.1	region001	TRUE	FALSE	FALSE	FALSE	30004..83492	FALSE	Bacteria_Actinobacteria_Corynebacteriales_Corynebacteriaceae_Corynebacterium	Corynebacterium bovis																										96.1		FALSE
GCF_003932295.1	NZ_PQNX01000005.1	region002	TRUE	FALSE	FALSE	FALSE	169560..202707	TRUE	Bacteria_Actinobacteria_Corynebacteriales_Corynebacteriaceae_Corynebacterium	Corynebacterium bovis																												FALSE
GCF_003932295.1	NZ_PQNX01000006.1	region001	TRUE	FALSE	FALSE	FALSE	<0..44452	TRUE	Bacteria_Actinobacteria_Corynebacteriales_Corynebacteriaceae_Corynebacterium	Corynebacterium bovis																												FALSE
GCF_000157895.3	NC_022663.1	region003	TRUE	TRUE	FALSE	TRUE	1071550..1137907	FALSE	Bacteria_Actinobacteria_Corynebacteriales_Mycobacteriaceae_Mycobacterium	Mycobacterium kansasii ATCC 12478					625.3	528.7																						FALSE
GCF_000157895.3	NC_022663.1	region004	TRUE	TRUE	FALSE	TRUE	1576892..1629064	FALSE	Bacteria_Actinobacteria_Corynebacteriales_Mycobacteriaceae_Mycobacterium	Mycobacterium kansasii ATCC 12478					703.9																							FALSE
GCF_006334925.1	NZ_VDHJ01000005.1	region002	FALSE	FALSE	TRUE	TRUE	192488..204726	FALSE	Bacteria_Actinobacteria_Corynebacteriales_Corynebacteriaceae_Corynebacterium	Corynebacterium tapiri																												FALSE
GCF_000613245.1	NZ_HG964937.1	region002	TRUE	TRUE	FALSE	TRUE	574008..690820	FALSE	Bacteria_Actinobacteria_Corynebacteriales_Mycobacteriaceae_Mycobacterium	Mycobacterium asiaticum DSM 44297					670.2	547.2																						FALSE
GCF_001021495.1	NZ_LDPP01000008.1	region001	TRUE	TRUE	FALSE	TRUE	16778..77618	FALSE	Bacteria_Actinobacteria_Corynebacteriales_Mycobacteriaceae_Mycobacterium	Mycobacterium nebraskense					757.9																							FALSE
GCF_007859215.1	NZ_VOHM01000011.1	region001	TRUE	FALSE	FALSE	FALSE	0..39393	TRUE	Bacteria_Actinobacteria_Corynebacteriales_Corynebacteriaceae_Corynebacterium	Corynebacterium canis																												FALSE
GCF_001021505.1	NZ_LDPO01000009.1	region001	TRUE	TRUE	FALSE	TRUE	155333..187081	TRUE	Bacteria_Actinobacteria_Corynebacteriales_Mycobacteriaceae_Mycobacterium	Mycobacterium heraklionense					722.2																							FALSE
GCF_009026825.1	NZ_CP045032.1	region005	FALSE	FALSE	TRUE	TRUE	1983196..1995671	FALSE	Bacteria_Actinobacteria_Corynebacteriales_Corynebacteriaceae_Corynebacterium	Corynebacterium urogenitale																										86.8	265.7	TRUE
GCF_016599755.1	NZ_CP067012.1	region004	FALSE	FALSE	TRUE	TRUE	2243598..2255941	FALSE	Bacteria_Actinobacteria_Corynebacteriales_Corynebacteriaceae_Corynebacterium	Corynebacterium kefirresidentii																												FALSE
GCF_016628615.2	NZ_JAACCD020000001.1	region001	FALSE	FALSE	TRUE	TRUE	1537040..1549383	FALSE	Bacteria_Actinobacteria_Corynebacteriales_Corynebacteriaceae_Corynebacterium	Corynebacterium macginleyi																												FALSE
GCF_001021505.1	NZ_LDPO01000012.1	region001	TRUE	TRUE	FALSE	TRUE	107126..158899	TRUE	Bacteria_Actinobacteria_Corynebacteriales_Mycobacteriaceae_Mycobacterium	Mycobacterium heraklionense						560.9																						FALSE
GCF_016728365.1	NZ_CP068156.1	region004	TRUE	FALSE	FALSE	FALSE	1122830..1169157	FALSE	Bacteria_Actinobacteria_Corynebacteriales_Corynebacteriaceae_Corynebacterium	Corynebacterium tuberculostearicum																												FALSE
GCF_016728645.1	NZ_CP068162.1	region003	TRUE	FALSE	FALSE	FALSE	2321569..2376917	FALSE	Bacteria_Actinobacteria_Corynebacteriales_Corynebacteriaceae_Corynebacterium	Corynebacterium glucuronolyticum																												FALSE
GCF_016728665.1	NZ_CP068161.1	region001	FALSE	FALSE	TRUE	TRUE	882060..894613	FALSE	Bacteria_Actinobacteria_Corynebacteriales_Corynebacteriaceae_Corynebacterium	Corynebacterium propinquum																										77.7	312.9	TRUE
GCF_001439515.1	NZ_LLXQ01000032.1	region001	TRUE	TRUE	FALSE	TRUE	0..60351	TRUE	Bacteria_Actinobacteria_Corynebacteriales_Mycobacteriaceae_Mycobacterium	Mycobacterium kyorinense					649.5	536.6																						FALSE
GCF_016728725.1	NZ_CP068168.1	region002	TRUE	FALSE	FALSE	FALSE	1112419..1158752	FALSE	Bacteria_Actinobacteria_Corynebacteriales_Corynebacteriaceae_Corynebacterium	Corynebacterium amycolatum																												FALSE
GCF_001499925.1	NZ_LQIR01000036.1	region001	TRUE	TRUE	FALSE	TRUE	0..22760	TRUE	Bacteria_Actinobacteria_Corynebacteriales_Mycobacteriaceae_Mycobacterium	Mycobacterium lehmannii					683.3																							FALSE
GCF_001854525.1	NZ_MLQM01000108.1	region001	TRUE	TRUE	FALSE	TRUE	0..18501	TRUE	Bacteria_Actinobacteria_Corynebacteriales_Mycobacteriaceae_Mycobacterium	Mycobacterium talmoniae					729.2																							FALSE
GCF_001854525.1	NZ_MLQM01000148.1	region001	TRUE	TRUE	FALSE	TRUE	0..13345	TRUE	Bacteria_Actinobacteria_Corynebacteriales_Mycobacteriaceae_Mycobacterium	Mycobacterium talmoniae						550.7																						FALSE
GCF_020616335.1	NZ_CP085051.1	region003	TRUE	FALSE	FALSE	FALSE	1949508..1996489	FALSE	Bacteria_Actinobacteria_Corynebacteriales_Corynebacteriaceae_Corynebacterium	Corynebacterium uberis																										50	247.4	TRUE
GCF_001907675.1	NZ_MPNT01000006.1	region002	TRUE	TRUE	FALSE	TRUE	127060..187855	FALSE	Bacteria_Actinobacteria_Corynebacteriales_Mycobacteriaceae_Mycobacterium	Mycobacterium paraffinicum					760.4																							FALSE
GCF_001942625.1	NZ_MLCL01000029.1	region001	TRUE	TRUE	FALSE	TRUE	66362..135589	FALSE	Bacteria_Actinobacteria_Corynebacteriales_Mycobacteriaceae_Mycobacterium	Mycobacterium syngnathidarum					691.3	524.2																						FALSE
GCF_021713135.1	NZ_JAKJKO010000001.1	region004	TRUE	FALSE	FALSE	FALSE	1401902..1479758	FALSE	Bacteria_Actinobacteria_Corynebacteriales_Corynebacteriaceae_Corynebacterium	Corynebacterium parakroppenstedtii																										78.3		FALSE
GCF_900078305.2	NZ_LT546011.1	region001	FALSE	FALSE	FALSE	FALSE	0..6161	TRUE	Bacteria_Actinobacteria_Corynebacteriales_Corynebacteriaceae_Corynebacterium	Corynebacterium bouchesdurhonense																												FALSE
GCF_900092335.1	NZ_LT596208.1	region001	TRUE	FALSE	FALSE	FALSE	106565..149292	FALSE	Bacteria_Actinobacteria_Corynebacteriales_Corynebacteriaceae_Corynebacterium	Corynebacterium phoceense																												FALSE
GCF_002086155.1	NZ_MVHE01000006.1	region002	TRUE	TRUE	FALSE	TRUE	138113..190219	FALSE	Bacteria_Actinobacteria_Corynebacteriales_Mycobacteriaceae_Mycobacterium	Mycobacterium angelicum					699.5																							FALSE
GCF_900187295.1	NZ_LT906473.1	region003	TRUE	FALSE	FALSE	FALSE	2147162..2191029	FALSE	Bacteria_Actinobacteria_Corynebacteriales_Corynebacteriaceae_Corynebacterium	Corynebacterium cystitidis																												FALSE
GCF_900205605.1	NZ_OANN01000079.1	region001	TRUE	FALSE	FALSE	FALSE	0..30053	TRUE	Bacteria_Actinobacteria_Corynebacteriales_Corynebacteriaceae_Corynebacterium	Corynebacterium belfantii																												FALSE
GCF_900205605.1	NZ_OANN01000091.1	region001	FALSE	FALSE	TRUE	TRUE	1559..14883	FALSE	Bacteria_Actinobacteria_Corynebacteriales_Corynebacteriaceae_Corynebacterium	Corynebacterium belfantii																										81.1	256	TRUE
GCF_002086155.1	NZ_MVHE01000030.1	region001	TRUE	TRUE	FALSE	TRUE	0..60651	TRUE	Bacteria_Actinobacteria_Corynebacteriales_Mycobacteriaceae_Mycobacterium	Mycobacterium angelicum					662.8	547.8																						FALSE
GCF_900478035.1	NZ_LS483464.1	region001	FALSE	FALSE	TRUE	TRUE	158504..170913	FALSE	Bacteria_Actinobacteria_Corynebacteriales_Corynebacteriaceae_Corynebacterium	Corynebacterium renale																										79.1	263.8	TRUE
GCF_002086485.1	NZ_MVHF01000001.1	region001	TRUE	TRUE	FALSE	TRUE	183559..246335	FALSE	Bacteria_Actinobacteria_Corynebacteriales_Mycobacteriaceae_Mycobacterium	Mycobacterium aquaticum					683.2	545.7																						FALSE
GCF_002086635.1	NZ_MVHD01000004.1	region002	TRUE	TRUE	FALSE	TRUE	150418..202000	TRUE	Bacteria_Actinobacteria_Corynebacteriales_Mycobacteriaceae_Mycobacterium	Mycobacterium alsense					753.8																							FALSE
GCF_009734425.1	NZ_CP046455.1	region004	TRUE	FALSE	FALSE	FALSE	2232711..2276524	FALSE	Bacteria_Actinobacteria_Corynebacteriales_Corynebacteriaceae_Corynebacterium_unclassified Corynebacterium	Corynebacterium sp. 2039																												FALSE
GCF_015351405.1	NZ_JADKMY010000003.1	region001	TRUE	FALSE	FALSE	FALSE	90796..144453	FALSE	Bacteria_Actinobacteria_Corynebacteriales_Corynebacteriaceae_Corynebacterium_unclassified Corynebacterium	Corynebacterium sp. DSM 45110				261.3																						84.1	299.2	TRUE
GCF_002086635.1	NZ_MVHD01000053.1	region001	TRUE	TRUE	FALSE	TRUE	0..35467	TRUE	Bacteria_Actinobacteria_Corynebacteriales_Mycobacteriaceae_Mycobacterium	Mycobacterium alsense					715.1																							FALSE
GCF_000226215.1	NZ_AGFF01000025.1	region001	FALSE	FALSE	TRUE	TRUE	42633..54982	FALSE	Bacteria_Actinobacteria_Corynebacteriales_Dietziaceae_Dietzia	Dietzia alimentaria 72																												FALSE
GCF_001571065.1	NZ_BCSW01000041.1	region001	FALSE	FALSE	TRUE	TRUE	18299..27106	TRUE	Bacteria_Actinobacteria_Corynebacteriales_Dietziaceae_Dietzia	Dietzia cinnamea NBRC 102147																										90.5		FALSE
GCF_001659785.1	NZ_CP015961.1	region005	TRUE	FALSE	FALSE	FALSE	1612160..1656138	FALSE	Bacteria_Actinobacteria_Corynebacteriales_Dietziaceae_Dietzia	Dietzia timorensis																												FALSE
GCF_002289575.1	NZ_NTGA01000005.1	region001	FALSE	FALSE	TRUE	TRUE	112910..125388	FALSE	Bacteria_Actinobacteria_Corynebacteriales_Dietziaceae_Dietzia	Dietzia natronolimnaea																										83.3		FALSE
GCF_002289575.1	NZ_NTGA01000015.1	region001	FALSE	FALSE	FALSE	FALSE	28084..70730	FALSE	Bacteria_Actinobacteria_Corynebacteriales_Dietziaceae_Dietzia	Dietzia natronolimnaea																												FALSE
GCF_003096075.1	NZ_CP015449.1	region003	FALSE	FALSE	TRUE	TRUE	1511961..1524559	FALSE	Bacteria_Actinobacteria_Corynebacteriales_Dietziaceae_Dietzia	Dietzia lutea																										90.5		FALSE
GCF_003096095.1	NZ_CP015453.1	region003	FALSE	FALSE	TRUE	TRUE	1483278..1495717	FALSE	Bacteria_Actinobacteria_Corynebacteriales_Dietziaceae_Dietzia	Dietzia psychralcaliphila																										83		FALSE
GCF_003096095.1	NZ_CP015453.1	region008	FALSE	FALSE	FALSE	FALSE	3277649..3320307	FALSE	Bacteria_Actinobacteria_Corynebacteriales_Dietziaceae_Dietzia	Dietzia psychralcaliphila																												FALSE
GCF_003294075.1	NZ_QNTT01000003.1	region001	FALSE	FALSE	TRUE	TRUE	86840..105450	FALSE	Bacteria_Actinobacteria_Corynebacteriales_Dietziaceae_Dietzia	Dietzia maris																										87.6		FALSE
GCF_014144865.1	NZ_JAALDM010000029.1	region001	FALSE	FALSE	TRUE	TRUE	0..5505	TRUE	Bacteria_Actinobacteria_Corynebacteriales_Dietziaceae_Dietzia	Dietzia aerolata																												FALSE
GCF_014145145.1	NZ_JAALEA010000076.1	region001	FALSE	FALSE	TRUE	TRUE	2076..13992	TRUE	Bacteria_Actinobacteria_Corynebacteriales_Dietziaceae_Dietzia	Dietzia cercidiphylli																										85.4		FALSE
GCF_018390595.1	NZ_JAHBAV010000029.1	region001	FALSE	FALSE	FALSE	FALSE	15928..41858	TRUE	Bacteria_Actinobacteria_Corynebacteriales_Dietziaceae_Dietzia	Dietzia massiliensis																												FALSE
GCF_018390595.1	NZ_JAHBAV010000055.1	region001	FALSE	FALSE	TRUE	TRUE	0..8771	TRUE	Bacteria_Actinobacteria_Corynebacteriales_Dietziaceae_Dietzia	Dietzia massiliensis																										90.5		FALSE
GCF_021033825.1	NZ_JAIFXZ010000019.1	region001	FALSE	FALSE	TRUE	TRUE	49218..58963	TRUE	Bacteria_Actinobacteria_Corynebacteriales_Dietziaceae_Dietzia	Dietzia aurantiaca																										93.8		FALSE
GCF_900182685.1	NZ_FXTG01000010.1	region001	FALSE	FALSE	TRUE	TRUE	85367..94514	TRUE	Bacteria_Actinobacteria_Corynebacteriales_Dietziaceae_Dietzia	Dietzia kunjamensis subsp. schimae																										90.6		FALSE
GCF_010993745.1	NZ_WOTN01000003.1	region001	TRUE	FALSE	FALSE	FALSE	8352..59989	FALSE	Bacteria_Actinobacteria_Corynebacteriales_Fodinicola	Fodinicola acaciae																												FALSE
GCF_010993745.1	NZ_WOTN01000003.1	region008	FALSE	FALSE	TRUE	TRUE	1592637..1607901	FALSE	Bacteria_Actinobacteria_Corynebacteriales_Fodinicola	Fodinicola acaciae																												FALSE
GCF_002086735.1	NZ_MVIJ01000001.1	region001	TRUE	TRUE	FALSE	TRUE	26040..140529	FALSE	Bacteria_Actinobacteria_Corynebacteriales_Mycobacteriaceae_Mycobacterium	Mycobacterium scrofulaceum					758.2	557.7																						FALSE
GCF_000024785.1	NC_013441.1	region005	TRUE	FALSE	FALSE	FALSE	2573541..2617529	FALSE	Bacteria_Actinobacteria_Corynebacteriales_Gordoniaceae_Gordonia	Gordonia bronchialis DSM 43247				270.8																						66		FALSE
GCF_000024785.1	NC_013441.1	region007	TRUE	FALSE	FALSE	FALSE	3915825..4049657	FALSE	Bacteria_Actinobacteria_Corynebacteriales_Gordoniaceae_Gordonia	Gordonia bronchialis DSM 43247																												FALSE
GCF_000024785.1	NC_013441.1	region009	FALSE	FALSE	FALSE	FALSE	4208048..4248689	FALSE	Bacteria_Actinobacteria_Corynebacteriales_Gordoniaceae_Gordonia	Gordonia bronchialis DSM 43247																												FALSE
GCF_000192435.1	NZ_AEUD01000003.1	region002	TRUE	FALSE	FALSE	FALSE	234954..279247	FALSE	Bacteria_Actinobacteria_Corynebacteriales_Gordoniaceae_Gordonia	Gordonia neofelifaecis NRRL B-59395																												FALSE
GCF_000192435.1	NZ_AEUD01000007.1	region001	TRUE	FALSE	FALSE	FALSE	0..46701	TRUE	Bacteria_Actinobacteria_Corynebacteriales_Gordoniaceae_Gordonia	Gordonia neofelifaecis NRRL B-59395																												FALSE
GCF_002086915.1	NZ_MWQA01000001.1	region003	TRUE	TRUE	FALSE	TRUE	1044595..1112144	FALSE	Bacteria_Actinobacteria_Corynebacteriales_Mycobacteriaceae_Mycobacterium	Mycobacterium persicum					628.1	524.3																						FALSE
GCF_000192435.1	NZ_AEUD01000025.1	region001	TRUE	FALSE	FALSE	FALSE	0..36777	TRUE	Bacteria_Actinobacteria_Corynebacteriales_Gordoniaceae_Gordonia	Gordonia neofelifaecis NRRL B-59395																												FALSE
GCF_000192435.1	NZ_AEUD01000034.1	region001	TRUE	FALSE	FALSE	FALSE	0..10696	TRUE	Bacteria_Actinobacteria_Corynebacteriales_Gordoniaceae_Gordonia	Gordonia neofelifaecis NRRL B-59395																												FALSE
GCF_002086915.1	NZ_MWQA01000001.1	region004	TRUE	TRUE	FALSE	TRUE	1575589..1627722	FALSE	Bacteria_Actinobacteria_Corynebacteriales_Mycobacteriaceae_Mycobacterium	Mycobacterium persicum					704.4																							FALSE
GCF_000241265.1	NZ_BAEE01000011.1	region001	TRUE	FALSE	FALSE	FALSE	0..97306	TRUE	Bacteria_Actinobacteria_Corynebacteriales_Gordoniaceae_Gordonia	Gordonia araii NBRC 100433																												FALSE
GCF_000241265.1	NZ_BAEE01000028.1	region001	TRUE	FALSE	FALSE	FALSE	0..27269	TRUE	Bacteria_Actinobacteria_Corynebacteriales_Gordoniaceae_Gordonia	Gordonia araii NBRC 100433																											273	FALSE
GCF_000241305.1	NZ_BAEH01000018.1	region001	FALSE	FALSE	FALSE	FALSE	4383..47770	FALSE	Bacteria_Actinobacteria_Corynebacteriales_Gordoniaceae_Gordonia	Gordonia effusa NBRC 100432																												FALSE
GCF_002101675.1	NZ_LQOY01000207.1	region001	TRUE	TRUE	FALSE	TRUE	3132..121672	FALSE	Bacteria_Actinobacteria_Corynebacteriales_Mycobacteriaceae_Mycobacterium	Mycobacterium gordonae					655.4	551.4																						FALSE
GCF_000241305.1	NZ_BAEH01000043.1	region001	TRUE	FALSE	FALSE	FALSE	0..24072	TRUE	Bacteria_Actinobacteria_Corynebacteriales_Gordoniaceae_Gordonia	Gordonia effusa NBRC 100432																												FALSE
GCF_000241305.1	NZ_BAEH01000091.1	region001	TRUE	FALSE	FALSE	FALSE	19820..64888	TRUE	Bacteria_Actinobacteria_Corynebacteriales_Gordoniaceae_Gordonia	Gordonia effusa NBRC 100432																												FALSE
GCF_000241305.1	NZ_BAEH01000096.1	region001	TRUE	FALSE	FALSE	FALSE	33..45355	FALSE	Bacteria_Actinobacteria_Corynebacteriales_Gordoniaceae_Gordonia	Gordonia effusa NBRC 100432																												FALSE
GCF_000241305.1	NZ_BAEH01000096.1	region002	TRUE	FALSE	FALSE	FALSE	51327..109186	FALSE	Bacteria_Actinobacteria_Corynebacteriales_Gordoniaceae_Gordonia	Gordonia effusa NBRC 100432																												FALSE
GCF_000241305.1	NZ_BAEH01000105.1	region001	TRUE	FALSE	FALSE	FALSE	0..44065	TRUE	Bacteria_Actinobacteria_Corynebacteriales_Gordoniaceae_Gordonia	Gordonia effusa NBRC 100432																												FALSE
GCF_002102025.1	NZ_LQOK01000047.1	region001	TRUE	TRUE	FALSE	TRUE	1870..114301	FALSE	Bacteria_Actinobacteria_Corynebacteriales_Mycobacteriaceae_Mycobacterium	Mycobacterium bohemicum					756.5	549.1																						FALSE
GCF_002102175.1	NZ_LQOX01000004.1	region001	TRUE	TRUE	FALSE	TRUE	0..48630	TRUE	Bacteria_Actinobacteria_Corynebacteriales_Mycobacteriaceae_Mycobacterium	Mycobacterium gastri						528.4																						FALSE
GCF_000247715.1	NC_016906.1	region005	TRUE	FALSE	FALSE	FALSE	1273618..1327939	FALSE	Bacteria_Actinobacteria_Corynebacteriales_Gordoniaceae_Gordonia	Gordonia polyisoprenivorans VH2																												FALSE
GCF_000247715.1	NC_016906.1	region008	FALSE	FALSE	FALSE	FALSE	2595190..2636779	FALSE	Bacteria_Actinobacteria_Corynebacteriales_Gordoniaceae_Gordonia	Gordonia polyisoprenivorans VH2																												FALSE
GCF_002102175.1	NZ_LQOX01000120.1	region001	TRUE	TRUE	FALSE	TRUE	0..28956	TRUE	Bacteria_Actinobacteria_Corynebacteriales_Mycobacteriaceae_Mycobacterium	Mycobacterium gastri					667.7																							FALSE
GCF_000247715.1	NC_016906.1	region010	TRUE	FALSE	FALSE	FALSE	3993609..4119698	FALSE	Bacteria_Actinobacteria_Corynebacteriales_Gordoniaceae_Gordonia	Gordonia polyisoprenivorans VH2																												FALSE
GCF_000247715.1	NC_016906.1	region014	TRUE	FALSE	FALSE	FALSE	5029382..5073747	FALSE	Bacteria_Actinobacteria_Corynebacteriales_Gordoniaceae_Gordonia	Gordonia polyisoprenivorans VH2																												FALSE
GCF_002102175.1	NZ_LQOX01000153.1	region001	TRUE	TRUE	FALSE	TRUE	41306..93448	FALSE	Bacteria_Actinobacteria_Corynebacteriales_Mycobacteriaceae_Mycobacterium	Mycobacterium gastri					701.8																							FALSE
GCF_000248055.1	NZ_BAFC01000042.1	region003	TRUE	FALSE	FALSE	FALSE	57415..93631	TRUE	Bacteria_Actinobacteria_Corynebacteriales_Gordoniaceae_Gordonia	Gordonia sputi NBRC 100414																												FALSE
GCF_000248055.1	NZ_BAFC01000045.1	region001	FALSE	FALSE	FALSE	FALSE	69101..111687	FALSE	Bacteria_Actinobacteria_Corynebacteriales_Gordoniaceae_Gordonia	Gordonia sputi NBRC 100414																												FALSE
GCF_000248055.1	NZ_BAFC01000075.1	region001	FALSE	FALSE	FALSE	FALSE	62031..95979	TRUE	Bacteria_Actinobacteria_Corynebacteriales_Gordoniaceae_Gordonia	Gordonia sputi NBRC 100414																												FALSE
GCF_000248055.1	NZ_BAFC01000120.1	region001	TRUE	FALSE	FALSE	FALSE	13859..71124	TRUE	Bacteria_Actinobacteria_Corynebacteriales_Gordoniaceae_Gordonia	Gordonia sputi NBRC 100414																												FALSE
GCF_000298195.1	NZ_BAHC01000078.1	region001	TRUE	FALSE	FALSE	FALSE	0..39017	TRUE	Bacteria_Actinobacteria_Corynebacteriales_Gordoniaceae_Gordonia	Gordonia rhizosphera NBRC 16068																												FALSE
GCF_002102185.1	NZ_LQOW01000008.1	region001	TRUE	TRUE	FALSE	TRUE	129848..154438	TRUE	Bacteria_Actinobacteria_Corynebacteriales_Mycobacteriaceae_Mycobacterium	Mycobacterium fragae	422.2																											FALSE
GCF_000298195.1	NZ_BAHC01000127.1	region001	TRUE	FALSE	FALSE	FALSE	0..45062	TRUE	Bacteria_Actinobacteria_Corynebacteriales_Gordoniaceae_Gordonia	Gordonia rhizosphera NBRC 16068																												FALSE
GCF_000298195.1	NZ_BAHC01000160.1	region001	TRUE	FALSE	FALSE	FALSE	0..19329	TRUE	Bacteria_Actinobacteria_Corynebacteriales_Gordoniaceae_Gordonia	Gordonia rhizosphera NBRC 16068																												FALSE
GCF_000298195.1	NZ_BAHC01000206.1	region001	TRUE	FALSE	FALSE	FALSE	0..33964	TRUE	Bacteria_Actinobacteria_Corynebacteriales_Gordoniaceae_Gordonia	Gordonia rhizosphera NBRC 16068																												FALSE
GCF_000298235.1	NZ_BAHE01000006.1	region001	TRUE	FALSE	FALSE	FALSE	74063..128832	FALSE	Bacteria_Actinobacteria_Corynebacteriales_Gordoniaceae_Gordonia	Gordonia namibiensis NBRC 108229																												FALSE
GCF_000298235.1	NZ_BAHE01000011.1	region001	TRUE	FALSE	FALSE	FALSE	<0..38779	TRUE	Bacteria_Actinobacteria_Corynebacteriales_Gordoniaceae_Gordonia	Gordonia namibiensis NBRC 108229																												FALSE
GCF_000298235.1	NZ_BAHE01000011.1	region003	TRUE	FALSE	FALSE	FALSE	126068..184365	FALSE	Bacteria_Actinobacteria_Corynebacteriales_Gordoniaceae_Gordonia	Gordonia namibiensis NBRC 108229																												FALSE
GCF_000298235.1	NZ_BAHE01000019.1	region001	TRUE	FALSE	FALSE	FALSE	134790..194173	TRUE	Bacteria_Actinobacteria_Corynebacteriales_Gordoniaceae_Gordonia	Gordonia namibiensis NBRC 108229																												FALSE
GCF_000298235.1	NZ_BAHE01000020.1	region002	FALSE	FALSE	FALSE	FALSE	63434..106014	FALSE	Bacteria_Actinobacteria_Corynebacteriales_Gordoniaceae_Gordonia	Gordonia namibiensis NBRC 108229																												FALSE
GCF_000298235.1	NZ_BAHE01000022.1	region001	TRUE	FALSE	TRUE	TRUE	128249..162705	TRUE	Bacteria_Actinobacteria_Corynebacteriales_Gordoniaceae_Gordonia	Gordonia namibiensis NBRC 108229																										77.8		FALSE
GCF_000298235.1	NZ_BAHE01000026.1	region001	TRUE	FALSE	FALSE	FALSE	344..38525	TRUE	Bacteria_Actinobacteria_Corynebacteriales_Gordoniaceae_Gordonia	Gordonia namibiensis NBRC 108229																												FALSE
GCF_000298235.1	NZ_BAHE01000028.1	region001	TRUE	FALSE	FALSE	FALSE	34373..74021	TRUE	Bacteria_Actinobacteria_Corynebacteriales_Gordoniaceae_Gordonia	Gordonia namibiensis NBRC 108229																												FALSE
GCF_000298235.1	NZ_BAHE01000043.1	region001	TRUE	FALSE	FALSE	FALSE	0..29880	TRUE	Bacteria_Actinobacteria_Corynebacteriales_Gordoniaceae_Gordonia	Gordonia namibiensis NBRC 108229																												FALSE
GCF_000298235.1	NZ_BAHE01000049.1	region001	TRUE	FALSE	FALSE	FALSE	0..9962	TRUE	Bacteria_Actinobacteria_Corynebacteriales_Gordoniaceae_Gordonia	Gordonia namibiensis NBRC 108229																												FALSE
GCF_000298235.1	NZ_BAHE01000052.1	region001	TRUE	FALSE	FALSE	FALSE	15817..80831	FALSE	Bacteria_Actinobacteria_Corynebacteriales_Gordoniaceae_Gordonia	Gordonia namibiensis NBRC 108229																												FALSE
GCF_000332975.1	NZ_BANR01000003.1	region001	FALSE	FALSE	FALSE	FALSE	195876..238847	FALSE	Bacteria_Actinobacteria_Corynebacteriales_Gordoniaceae_Gordonia	Gordonia aichiensis NBRC 108223																												FALSE
GCF_000332975.1	NZ_BANR01000003.1	region003	TRUE	FALSE	FALSE	FALSE	294862..401248	FALSE	Bacteria_Actinobacteria_Corynebacteriales_Gordoniaceae_Gordonia	Gordonia aichiensis NBRC 108223																												FALSE
GCF_000332975.1	NZ_BANR01000004.1	region001	FALSE	FALSE	FALSE	FALSE	474898..517472	FALSE	Bacteria_Actinobacteria_Corynebacteriales_Gordoniaceae_Gordonia	Gordonia aichiensis NBRC 108223																												FALSE
GCF_002102185.1	NZ_LQOW01000031.1	region002	TRUE	TRUE	FALSE	TRUE	204749..272702	FALSE	Bacteria_Actinobacteria_Corynebacteriales_Mycobacteriaceae_Mycobacterium	Mycobacterium fragae					732.9	550.7																						FALSE
GCF_000332975.1	NZ_BANR01000019.1	region001	TRUE	FALSE	FALSE	FALSE	14812..58748	FALSE	Bacteria_Actinobacteria_Corynebacteriales_Gordoniaceae_Gordonia	Gordonia aichiensis NBRC 108223																												FALSE
GCF_000333015.1	NZ_BANT01000006.1	region001	TRUE	FALSE	FALSE	FALSE	26615..92799	TRUE	Bacteria_Actinobacteria_Corynebacteriales_Gordoniaceae_Gordonia	Gordonia hirsuta DSM 44140 = NBRC 16056																												FALSE
GCF_000333015.1	NZ_BANT01000007.1	region001	TRUE	FALSE	FALSE	FALSE	0..31614	TRUE	Bacteria_Actinobacteria_Corynebacteriales_Gordoniaceae_Gordonia	Gordonia hirsuta DSM 44140 = NBRC 16056																												FALSE
GCF_002104675.1	NZ_NCXP01000035.1	region001	TRUE	TRUE	FALSE	TRUE	0..43777	TRUE	Bacteria_Actinobacteria_Corynebacteriales_Mycobacteriaceae_Mycobacterium	Mycobacterium decipiens					775.1	555.2																						FALSE
GCF_000333015.1	NZ_BANT01000058.1	region001	TRUE	FALSE	FALSE	FALSE	0..16719	TRUE	Bacteria_Actinobacteria_Corynebacteriales_Gordoniaceae_Gordonia	Gordonia hirsuta DSM 44140 = NBRC 16056				266.1																								FALSE
GCF_000333035.1	NZ_BANU01000008.1	region001	TRUE	FALSE	FALSE	FALSE	118799..221675	FALSE	Bacteria_Actinobacteria_Corynebacteriales_Gordoniaceae_Gordonia	Gordonia sihwensis NBRC 108236																												FALSE
GCF_002104765.1	NZ_NCXM01000023.1	region001	TRUE	TRUE	FALSE	TRUE	0..58309	TRUE	Bacteria_Actinobacteria_Corynebacteriales_Mycobacteriaceae_Mycobacterium	Mycobacterium vulneris					753																							FALSE
GCF_000333035.1	NZ_BANU01000032.1	region001	TRUE	FALSE	FALSE	FALSE	13814..64806	TRUE	Bacteria_Actinobacteria_Corynebacteriales_Gordoniaceae_Gordonia	Gordonia sihwensis NBRC 108236																												FALSE
GCF_000334455.1	NZ_BANX01000001.1	region001	TRUE	FALSE	FALSE	FALSE	50251..102568	TRUE	Bacteria_Actinobacteria_Corynebacteriales_Gordoniaceae_Gordonia	Gordonia soli NBRC 108243																												FALSE
GCF_000334455.1	NZ_BANX01000005.1	region001	FALSE	FALSE	FALSE	FALSE	101270..145344	FALSE	Bacteria_Actinobacteria_Corynebacteriales_Gordoniaceae_Gordonia	Gordonia soli NBRC 108243																										46.5		FALSE
GCF_000334455.1	NZ_BANX01000016.1	region001	TRUE	FALSE	FALSE	FALSE	0..38980	TRUE	Bacteria_Actinobacteria_Corynebacteriales_Gordoniaceae_Gordonia	Gordonia soli NBRC 108243																												FALSE
GCF_000334455.1	NZ_BANX01000038.1	region001	TRUE	FALSE	TRUE	TRUE	41470..84950	FALSE	Bacteria_Actinobacteria_Corynebacteriales_Gordoniaceae_Gordonia	Gordonia soli NBRC 108243																												FALSE
GCF_000334455.1	NZ_BANX01000043.1	region001	TRUE	FALSE	FALSE	FALSE	16242..46598	TRUE	Bacteria_Actinobacteria_Corynebacteriales_Gordoniaceae_Gordonia	Gordonia soli NBRC 108243																												FALSE
GCF_000334455.1	NZ_BANX01000046.1	region001	TRUE	FALSE	FALSE	FALSE	10689..40968	TRUE	Bacteria_Actinobacteria_Corynebacteriales_Gordoniaceae_Gordonia	Gordonia soli NBRC 108243																												FALSE
GCF_000334455.1	NZ_BANX01000048.1	region001	TRUE	FALSE	FALSE	FALSE	0..30682	TRUE	Bacteria_Actinobacteria_Corynebacteriales_Gordoniaceae_Gordonia	Gordonia soli NBRC 108243																												FALSE
GCF_000334455.1	NZ_BANX01000049.1	region001	TRUE	FALSE	FALSE	FALSE	0..29713	TRUE	Bacteria_Actinobacteria_Corynebacteriales_Gordoniaceae_Gordonia	Gordonia soli NBRC 108243																												FALSE
GCF_000334455.1	NZ_BANX01000050.1	region001	TRUE	FALSE	FALSE	FALSE	0..21560	TRUE	Bacteria_Actinobacteria_Corynebacteriales_Gordoniaceae_Gordonia	Gordonia soli NBRC 108243																												FALSE
GCF_000334455.1	NZ_BANX01000054.1	region001	TRUE	FALSE	FALSE	FALSE	0..2401	TRUE	Bacteria_Actinobacteria_Corynebacteriales_Gordoniaceae_Gordonia	Gordonia soli NBRC 108243																												FALSE
GCF_000344135.1	NZ_BAOP01000002.1	region001	TRUE	FALSE	FALSE	FALSE	113780..230988	FALSE	Bacteria_Actinobacteria_Corynebacteriales_Gordoniaceae_Gordonia	Gordonia malaquae NBRC 108250																												FALSE
GCF_000344135.1	NZ_BAOP01000004.1	region002	TRUE	FALSE	FALSE	FALSE	174063..234443	FALSE	Bacteria_Actinobacteria_Corynebacteriales_Gordoniaceae_Gordonia	Gordonia malaquae NBRC 108250																										91.8	307.8	TRUE
GCF_000344135.1	NZ_BAOP01000017.1	region001	TRUE	FALSE	FALSE	FALSE	69981..103418	TRUE	Bacteria_Actinobacteria_Corynebacteriales_Gordoniaceae_Gordonia	Gordonia malaquae NBRC 108250																												FALSE
GCF_002116635.1	NZ_LQPW01000022.1	region001	TRUE	TRUE	FALSE	TRUE	31894..96322	TRUE	Bacteria_Actinobacteria_Corynebacteriales_Mycobacteriaceae_Mycobacterium	Mycobacterium szulgai					654.2	551.1																						FALSE
GCF_002116635.1	NZ_LQPW01000167.1	region001	TRUE	TRUE	FALSE	TRUE	19811..71851	FALSE	Bacteria_Actinobacteria_Corynebacteriales_Mycobacteriaceae_Mycobacterium	Mycobacterium szulgai					693.3																							FALSE
GCF_001186365.1	NZ_LDTZ01000014.1	region001	FALSE	FALSE	FALSE	FALSE	273440..316890	FALSE	Bacteria_Actinobacteria_Corynebacteriales_Gordoniaceae_Gordonia	Gordonia jacobaea																												FALSE
GCF_001186365.1	NZ_LDTZ01000016.1	region001	FALSE	FALSE	FALSE	FALSE	132255..173623	FALSE	Bacteria_Actinobacteria_Corynebacteriales_Gordoniaceae_Gordonia	Gordonia jacobaea																												FALSE
GCF_001186365.1	NZ_LDTZ01000016.1	region004	TRUE	FALSE	FALSE	FALSE	240349..338398	FALSE	Bacteria_Actinobacteria_Corynebacteriales_Gordoniaceae_Gordonia	Gordonia jacobaea																												FALSE
GCF_001305675.1	NZ_CP011853.1	region005	TRUE	FALSE	FALSE	FALSE	2256418..2298558	FALSE	Bacteria_Actinobacteria_Corynebacteriales_Gordoniaceae_Gordonia	Gordonia phthalatica																										79.7	285.4	TRUE
GCF_001305675.1	NZ_CP011853.1	region007	TRUE	FALSE	FALSE	FALSE	3323443..3423741	FALSE	Bacteria_Actinobacteria_Corynebacteriales_Gordoniaceae_Gordonia	Gordonia phthalatica																												FALSE
GCF_002157835.1	NZ_CP020809.1	region005	TRUE	TRUE	FALSE	TRUE	2538622..2601404	FALSE	Bacteria_Actinobacteria_Corynebacteriales_Mycobacteriaceae_Mycobacterium	Mycobacterium dioxanotrophicus					679.2	543.6																						FALSE
GCF_001485495.1	NZ_BCNF01000012.1	region001	TRUE	FALSE	FALSE	FALSE	12197..114621	FALSE	Bacteria_Actinobacteria_Corynebacteriales_Gordoniaceae_Gordonia	Gordonia desulfuricans NBRC 100010																												FALSE
GCF_001485495.1	NZ_BCNF01000071.1	region001	TRUE	FALSE	FALSE	FALSE	9610..49370	TRUE	Bacteria_Actinobacteria_Corynebacteriales_Gordoniaceae_Gordonia	Gordonia desulfuricans NBRC 100010																												FALSE
GCF_001485495.1	NZ_BCNF01000085.1	region001	TRUE	FALSE	FALSE	FALSE	0..42016	TRUE	Bacteria_Actinobacteria_Corynebacteriales_Gordoniaceae_Gordonia	Gordonia desulfuricans NBRC 100010																												FALSE
GCF_001485495.1	NZ_BCNF01000095.1	region001	FALSE	FALSE	FALSE	FALSE	0..9148	TRUE	Bacteria_Actinobacteria_Corynebacteriales_Gordoniaceae_Gordonia	Gordonia desulfuricans NBRC 100010																												FALSE
GCF_002245615.1	NZ_NKCO01000002.1	region001	TRUE	TRUE	FALSE	TRUE	359690..427600	TRUE	Bacteria_Actinobacteria_Corynebacteriales_Mycobacteriaceae_Mycobacterium	Mycobacterium neumannii					682.1																							FALSE
GCF_001485495.1	NZ_BCNF01000125.1	region001	TRUE	FALSE	FALSE	FALSE	0..25098	TRUE	Bacteria_Actinobacteria_Corynebacteriales_Gordoniaceae_Gordonia	Gordonia desulfuricans NBRC 100010				263.1																						89.4		FALSE
GCF_001485495.1	NZ_BCNF01000145.1	region001	TRUE	FALSE	FALSE	FALSE	0..18805	TRUE	Bacteria_Actinobacteria_Corynebacteriales_Gordoniaceae_Gordonia	Gordonia desulfuricans NBRC 100010																												FALSE
GCF_002591975.1	NZ_NVQE01000013.1	region001	TRUE	TRUE	FALSE	TRUE	87416..145095	TRUE	Bacteria_Actinobacteria_Corynebacteriales_Mycobacteriaceae_Mycobacterium	Mycobacterium neglectum					678.1																							FALSE
GCF_001592365.1	NZ_BCWU01000003.1	region001	TRUE	FALSE	FALSE	FALSE	0..54355	TRUE	Bacteria_Actinobacteria_Corynebacteriales_Gordoniaceae_Gordonia	Gordonia hydrophobica NBRC 16057																												FALSE
GCF_001592365.1	NZ_BCWU01000005.1	region001	TRUE	FALSE	FALSE	FALSE	233605..284186	FALSE	Bacteria_Actinobacteria_Corynebacteriales_Gordoniaceae_Gordonia	Gordonia hydrophobica NBRC 16057																										86.6	268.3	TRUE
GCF_001592365.1	NZ_BCWU01000016.1	region001	TRUE	FALSE	FALSE	FALSE	9959..85863	TRUE	Bacteria_Actinobacteria_Corynebacteriales_Gordoniaceae_Gordonia	Gordonia hydrophobica NBRC 16057																												FALSE
GCF_001592365.1	NZ_BCWU01000022.1	region001	TRUE	FALSE	FALSE	FALSE	0..16464	TRUE	Bacteria_Actinobacteria_Corynebacteriales_Gordoniaceae_Gordonia	Gordonia hydrophobica NBRC 16057																												FALSE
GCF_001592365.1	NZ_BCWU01000024.1	region001	TRUE	FALSE	FALSE	FALSE	0..3747	TRUE	Bacteria_Actinobacteria_Corynebacteriales_Gordoniaceae_Gordonia	Gordonia hydrophobica NBRC 16057																												FALSE
GCF_002149015.1	NZ_NGFO01000001.1	region001	FALSE	FALSE	FALSE	FALSE	68708..143537	FALSE	Bacteria_Actinobacteria_Corynebacteriales_Gordoniaceae_Gordonia	Gordonia lacunae																										95.7	295.5	TRUE
GCF_002149015.1	NZ_NGFO01000003.1	region001	TRUE	FALSE	FALSE	FALSE	159208..203465	FALSE	Bacteria_Actinobacteria_Corynebacteriales_Gordoniaceae_Gordonia	Gordonia lacunae																												FALSE
GCF_002149015.1	NZ_NGFO01000005.1	region001	TRUE	FALSE	FALSE	FALSE	10481..139685	FALSE	Bacteria_Actinobacteria_Corynebacteriales_Gordoniaceae_Gordonia	Gordonia lacunae																												FALSE
GCF_002149015.1	NZ_NGFO01000013.1	region001	TRUE	FALSE	FALSE	FALSE	0..39984	TRUE	Bacteria_Actinobacteria_Corynebacteriales_Gordoniaceae_Gordonia	Gordonia lacunae																												FALSE
GCF_002592005.1	NZ_NVQF01000047.1	region001	TRUE	TRUE	FALSE	TRUE	0..39326	TRUE	Bacteria_Actinobacteria_Corynebacteriales_Mycobacteriaceae_Mycobacterium	Mycobacterium palauense					677.1																							FALSE
GCF_002149015.1	NZ_NGFO01000031.1	region001	TRUE	FALSE	FALSE	FALSE	16166..66730	TRUE	Bacteria_Actinobacteria_Corynebacteriales_Gordoniaceae_Gordonia	Gordonia lacunae																												FALSE
GCF_002149015.1	NZ_NGFO01000037.1	region001	TRUE	FALSE	FALSE	FALSE	0..31172	TRUE	Bacteria_Actinobacteria_Corynebacteriales_Gordoniaceae_Gordonia	Gordonia lacunae																												FALSE
GCF_002149015.1	NZ_NGFO01000038.1	region001	TRUE	FALSE	FALSE	FALSE	146..40536	TRUE	Bacteria_Actinobacteria_Corynebacteriales_Gordoniaceae_Gordonia	Gordonia lacunae																												FALSE
GCF_002149015.1	NZ_NGFO01000058.1	region001	FALSE	FALSE	FALSE	FALSE	0..14637	TRUE	Bacteria_Actinobacteria_Corynebacteriales_Gordoniaceae_Gordonia	Gordonia lacunae																												FALSE
GCF_002993285.1	NZ_CP027433.1	region003	TRUE	FALSE	FALSE	FALSE	1188729..1229043	FALSE	Bacteria_Actinobacteria_Corynebacteriales_Gordoniaceae_Gordonia	Gordonia iterans																												FALSE
GCF_002742165.1	NZ_PDKV01000003.1	region003	TRUE	TRUE	FALSE	TRUE	175276..245299	FALSE	Bacteria_Actinobacteria_Corynebacteriales_Mycobacteriaceae_Mycobacterium	Mycobacterium celatum					655.7	542.5																						FALSE
GCF_002993285.1	NZ_CP027433.1	region009	TRUE	FALSE	FALSE	FALSE	3442956..3609425	FALSE	Bacteria_Actinobacteria_Corynebacteriales_Gordoniaceae_Gordonia	Gordonia iterans																												FALSE
GCF_002993285.1	NZ_CP027433.1	region010	FALSE	FALSE	FALSE	FALSE	3648109..3689748	FALSE	Bacteria_Actinobacteria_Corynebacteriales_Gordoniaceae_Gordonia	Gordonia iterans																												FALSE
GCF_003797185.1	NZ_RKMH01000007.1	region001	TRUE	FALSE	FALSE	FALSE	178006..280323	FALSE	Bacteria_Actinobacteria_Corynebacteriales_Gordoniaceae_Gordonia	Gordonia oryzae																												FALSE
GCF_003584745.1	NZ_AP018410.1	region019	TRUE	TRUE	FALSE	TRUE	4042667..4114100	FALSE	Bacteria_Actinobacteria_Corynebacteriales_Mycobacteriaceae_Mycobacterium	Mycobacterium pseudoshottsii JCM 15466					654.9	546.8																						FALSE
GCF_003614435.1	NZ_CP025546.1	region001	TRUE	TRUE	FALSE	TRUE	136132..186800	FALSE	Bacteria_Actinobacteria_Corynebacteriales_Mycobacteriaceae_Mycobacterium	Mycobacterium paragordonae					696.3																							FALSE
GCF_003855095.1	NZ_CP033972.1	region004	FALSE	FALSE	FALSE	FALSE	1513944..1556951	FALSE	Bacteria_Actinobacteria_Corynebacteriales_Gordoniaceae_Gordonia	Gordonia insulae																												FALSE
GCF_003855095.1	NZ_CP033972.1	region005	TRUE	FALSE	FALSE	FALSE	1744708..1808099	FALSE	Bacteria_Actinobacteria_Corynebacteriales_Gordoniaceae_Gordonia	Gordonia insulae			406.4																							87	315.8	TRUE
GCF_003614435.1	NZ_CP025546.1	region015	TRUE	TRUE	FALSE	TRUE	4528728..4646388	FALSE	Bacteria_Actinobacteria_Corynebacteriales_Mycobacteriaceae_Mycobacterium	Mycobacterium paragordonae					646.9	554.7																						FALSE
GCF_003855095.1	NZ_CP033972.1	region011	TRUE	FALSE	FALSE	FALSE	3805834..3849181	FALSE	Bacteria_Actinobacteria_Corynebacteriales_Gordoniaceae_Gordonia	Gordonia insulae																												FALSE
GCF_003855095.1	NZ_CP033972.1	region013	TRUE	FALSE	FALSE	FALSE	5054996..5108200	FALSE	Bacteria_Actinobacteria_Corynebacteriales_Gordoniaceae_Gordonia	Gordonia insulae																												FALSE
GCF_003855095.1	NZ_CP033972.1	region015	TRUE	FALSE	FALSE	FALSE	5324483..5490915	FALSE	Bacteria_Actinobacteria_Corynebacteriales_Gordoniaceae_Gordonia	Gordonia insulae																												FALSE
GCF_007714185.1	NZ_VMQV01000089.1	region001	TRUE	TRUE	FALSE	TRUE	0..21890	TRUE	Bacteria_Actinobacteria_Corynebacteriales_Mycobacteriaceae_Mycobacterium	Mycobacterium helveticum					636.1																							FALSE
GCF_004011905.1	NZ_CP027114.1	region006	TRUE	FALSE	FALSE	FALSE	1829389..1886348	FALSE	Bacteria_Actinobacteria_Corynebacteriales_Gordoniaceae_Gordonia	Gordonia alkanivorans																												FALSE
GCF_004011905.1	NZ_CP027114.1	region008	TRUE	FALSE	FALSE	FALSE	1982259..2109963	FALSE	Bacteria_Actinobacteria_Corynebacteriales_Gordoniaceae_Gordonia	Gordonia alkanivorans																												FALSE
GCF_004011905.1	NZ_CP027114.1	region012	TRUE	FALSE	FALSE	FALSE	3800643..3872124	FALSE	Bacteria_Actinobacteria_Corynebacteriales_Gordoniaceae_Gordonia	Gordonia alkanivorans																												FALSE
GCF_004011905.1	NZ_CP027114.1	region013	TRUE	FALSE	FALSE	FALSE	4859917..4907207	FALSE	Bacteria_Actinobacteria_Corynebacteriales_Gordoniaceae_Gordonia	Gordonia alkanivorans																												FALSE
GCF_007559005.1	NZ_CP041763.1	region002	TRUE	FALSE	FALSE	FALSE	467864..520256	FALSE	Bacteria_Actinobacteria_Corynebacteriales_Gordoniaceae_Gordonia	Gordonia zhaorongruii																												FALSE
GCF_007559005.1	NZ_CP041763.1	region003	TRUE	FALSE	TRUE	TRUE	607509..649624	FALSE	Bacteria_Actinobacteria_Corynebacteriales_Gordoniaceae_Gordonia	Gordonia zhaorongruii																										77.4	283.1	TRUE
GCF_007559005.1	NZ_CP041763.1	region006	TRUE	FALSE	FALSE	FALSE	1622749..1666802	FALSE	Bacteria_Actinobacteria_Corynebacteriales_Gordoniaceae_Gordonia	Gordonia zhaorongruii																												FALSE
GCF_007559005.1	NZ_CP041763.1	region008	TRUE	FALSE	FALSE	FALSE	2505302..2604790	FALSE	Bacteria_Actinobacteria_Corynebacteriales_Gordoniaceae_Gordonia	Gordonia zhaorongruii																												FALSE
GCF_009828195.1	NZ_WMBR01000001.1	region001	TRUE	FALSE	FALSE	FALSE	88424..152261	FALSE	Bacteria_Actinobacteria_Corynebacteriales_Gordoniaceae_Gordonia	Gordonia mangrovi																										69.6	265.6	TRUE
GCF_009828195.1	NZ_WMBR01000001.1	region002	TRUE	FALSE	FALSE	FALSE	557676..609554	FALSE	Bacteria_Actinobacteria_Corynebacteriales_Gordoniaceae_Gordonia	Gordonia mangrovi																												FALSE
GCF_009828195.1	NZ_WMBR01000001.1	region004	TRUE	FALSE	FALSE	FALSE	837793..910825	FALSE	Bacteria_Actinobacteria_Corynebacteriales_Gordoniaceae_Gordonia	Gordonia mangrovi																												FALSE
GCF_008329645.1	NZ_CP043474.1	region016	TRUE	TRUE	FALSE	TRUE	4779120..4845783	FALSE	Bacteria_Actinobacteria_Corynebacteriales_Mycobacteriaceae_Mycobacterium	Mycobacterium grossiae					674.1																							FALSE
GCF_009914515.1	NZ_CP045805.1	region002	TRUE	FALSE	FALSE	FALSE	1642900..1732523	FALSE	Bacteria_Actinobacteria_Corynebacteriales_Gordoniaceae_Gordonia	Gordonia amarae																										73.3	295.8	TRUE
GCF_009914515.1	NZ_CP045805.1	region006	FALSE	FALSE	FALSE	FALSE	2717178..2757247	FALSE	Bacteria_Actinobacteria_Corynebacteriales_Gordoniaceae_Gordonia	Gordonia amarae																											308.4	FALSE
GCF_009914515.1	NZ_CP045805.1	region007	TRUE	FALSE	FALSE	FALSE	3049019..3114373	FALSE	Bacteria_Actinobacteria_Corynebacteriales_Gordoniaceae_Gordonia	Gordonia amarae																												FALSE
GCF_009914515.1	NZ_CP045805.1	region009	TRUE	FALSE	FALSE	FALSE	3990387..4148524	FALSE	Bacteria_Actinobacteria_Corynebacteriales_Gordoniaceae_Gordonia	Gordonia amarae																												FALSE
GCF_009914515.1	NZ_CP045805.1	region012	FALSE	FALSE	FALSE	FALSE	4707404..4778633	FALSE	Bacteria_Actinobacteria_Corynebacteriales_Gordoniaceae_Gordonia	Gordonia amarae																												FALSE
GCF_009914535.1	NZ_CP045806.1	region005	TRUE	FALSE	FALSE	FALSE	1536937..1629307	FALSE	Bacteria_Actinobacteria_Corynebacteriales_Gordoniaceae_Gordonia	Gordonia pseudoamarae																										61.9	297.1	TRUE
GCF_009914535.1	NZ_CP045806.1	region009	FALSE	FALSE	FALSE	FALSE	2409766..2450734	FALSE	Bacteria_Actinobacteria_Corynebacteriales_Gordoniaceae_Gordonia	Gordonia pseudoamarae																												FALSE
GCF_009914535.1	NZ_CP045806.1	region010	FALSE	FALSE	FALSE	FALSE	2603938..2644377	FALSE	Bacteria_Actinobacteria_Corynebacteriales_Gordoniaceae_Gordonia	Gordonia pseudoamarae																											304.8	FALSE
GCF_009914535.1	NZ_CP045806.1	region011	TRUE	FALSE	FALSE	FALSE	2907666..2971723	FALSE	Bacteria_Actinobacteria_Corynebacteriales_Gordoniaceae_Gordonia	Gordonia pseudoamarae																												FALSE
GCF_009914535.1	NZ_CP045806.1	region014	TRUE	FALSE	FALSE	FALSE	3860586..4065244	FALSE	Bacteria_Actinobacteria_Corynebacteriales_Gordoniaceae_Gordonia	Gordonia pseudoamarae																												FALSE
GCF_009914535.1	NZ_CP045806.1	region015	TRUE	FALSE	FALSE	FALSE	4380227..4426011	FALSE	Bacteria_Actinobacteria_Corynebacteriales_Gordoniaceae_Gordonia	Gordonia pseudoamarae																												FALSE
GCF_010723305.1	NZ_BLKW01000004.1	region003	TRUE	TRUE	FALSE	TRUE	705604..769957	FALSE	Bacteria_Actinobacteria_Corynebacteriales_Mycobacteriaceae_Mycobacterium	Mycobacterium botniense					752.1	540.7																						FALSE
GCF_009932435.1	NZ_BJOU01000001.1	region006	TRUE	FALSE	FALSE	FALSE	1330112..1375885	FALSE	Bacteria_Actinobacteria_Corynebacteriales_Gordoniaceae_Gordonia	Gordonia crocea				268.6																						67.7	268.9	TRUE
GCF_009932435.1	NZ_BJOU01000002.1	region001	TRUE	FALSE	FALSE	FALSE	251563..295649	FALSE	Bacteria_Actinobacteria_Corynebacteriales_Gordoniaceae_Gordonia	Gordonia crocea																										47.7	295.5	TRUE
GCF_009932435.1	NZ_BJOU01000019.1	region001	TRUE	FALSE	FALSE	FALSE	47896..136796	FALSE	Bacteria_Actinobacteria_Corynebacteriales_Gordoniaceae_Gordonia	Gordonia crocea																												FALSE
GCF_009932475.1	NZ_BJOV01000001.1	region001	TRUE	FALSE	FALSE	FALSE	306979..404864	FALSE	Bacteria_Actinobacteria_Corynebacteriales_Gordoniaceae_Gordonia	Gordonia spumicola																												FALSE
GCF_009932475.1	NZ_BJOV01000002.1	region004	TRUE	FALSE	FALSE	FALSE	637507..681704	FALSE	Bacteria_Actinobacteria_Corynebacteriales_Gordoniaceae_Gordonia	Gordonia spumicola																										45.6	295.5	TRUE
GCF_010723575.1	NZ_BLKZ01000001.1	region016	TRUE	TRUE	FALSE	TRUE	4230881..4354739	FALSE	Bacteria_Actinobacteria_Corynebacteriales_Mycobacteriaceae_Mycobacterium	Mycobacterium bourgelatii					651.2	560																						FALSE
GCF_012933505.1	NZ_JABBNB010000002.1	region001	TRUE	FALSE	FALSE	FALSE	7..128352	FALSE	Bacteria_Actinobacteria_Corynebacteriales_Gordoniaceae_Gordonia	Gordonia asplenii																												FALSE
GCF_012933505.1	NZ_JABBNB010000002.1	region002	TRUE	FALSE	FALSE	FALSE	130315..188142	FALSE	Bacteria_Actinobacteria_Corynebacteriales_Gordoniaceae_Gordonia	Gordonia asplenii																												FALSE
GCF_012933505.1	NZ_JABBNB010000006.1	region001	TRUE	FALSE	FALSE	FALSE	0..31671	TRUE	Bacteria_Actinobacteria_Corynebacteriales_Gordoniaceae_Gordonia	Gordonia asplenii				272.2																						80.6	276.7	TRUE
GCF_012933505.1	NZ_JABBNB010000012.1	region002	TRUE	FALSE	FALSE	FALSE	112107..173398	TRUE	Bacteria_Actinobacteria_Corynebacteriales_Gordoniaceae_Gordonia	Gordonia asplenii																												FALSE
GCF_010726505.1	NZ_AP022562.1	region002	TRUE	TRUE	FALSE	TRUE	334507..412417	FALSE	Bacteria_Actinobacteria_Corynebacteriales_Mycobacteriaceae_Mycobacterium	Mycobacterium novum					715.4																							FALSE
GCF_012933505.1	NZ_JABBNB010000075.1	region001	TRUE	FALSE	FALSE	FALSE	0..1496	TRUE	Bacteria_Actinobacteria_Corynebacteriales_Gordoniaceae_Gordonia	Gordonia asplenii																												FALSE
GCF_014041935.1	NZ_CP059491.1	region001	TRUE	FALSE	FALSE	FALSE	37987..103087	FALSE	Bacteria_Actinobacteria_Corynebacteriales_Gordoniaceae_Gordonia	Gordonia jinghuaiqii																												FALSE
GCF_014041935.1	NZ_CP059491.1	region003	FALSE	FALSE	FALSE	FALSE	264153..304053	FALSE	Bacteria_Actinobacteria_Corynebacteriales_Gordoniaceae_Gordonia	Gordonia jinghuaiqii																												FALSE
GCF_010727945.1	NZ_AP022569.1	region005	TRUE	TRUE	FALSE	TRUE	1445149..1581504	FALSE	Bacteria_Actinobacteria_Corynebacteriales_Mycobacteriaceae_Mycobacterium	Mycobacterium cookii					733.2	543.1																						FALSE
GCF_014041935.1	NZ_CP059491.1	region005	TRUE	FALSE	FALSE	FALSE	1056304..1109809	FALSE	Bacteria_Actinobacteria_Corynebacteriales_Gordoniaceae_Gordonia	Gordonia jinghuaiqii																												FALSE
GCF_014041935.1	NZ_CP059491.1	region009	TRUE	FALSE	FALSE	FALSE	3051927..3123569	FALSE	Bacteria_Actinobacteria_Corynebacteriales_Gordoniaceae_Gordonia	Gordonia jinghuaiqii																												FALSE
GCF_014041935.1	NZ_CP059491.1	region010	TRUE	FALSE	FALSE	FALSE	3916659..4048583	FALSE	Bacteria_Actinobacteria_Corynebacteriales_Gordoniaceae_Gordonia	Gordonia jinghuaiqii																												FALSE
GCF_014070455.1	NZ_CP059694.1	region002	TRUE	FALSE	FALSE	FALSE	132459..189353	FALSE	Bacteria_Actinobacteria_Corynebacteriales_Gordoniaceae_Gordonia	Gordonia rubripertincta																												FALSE
GCF_014070455.1	NZ_CP059694.1	region003	TRUE	FALSE	FALSE	FALSE	345974..388315	FALSE	Bacteria_Actinobacteria_Corynebacteriales_Gordoniaceae_Gordonia	Gordonia rubripertincta																												FALSE
GCF_014070455.1	NZ_CP059694.1	region007	TRUE	FALSE	FALSE	FALSE	1021391..1085734	FALSE	Bacteria_Actinobacteria_Corynebacteriales_Gordoniaceae_Gordonia	Gordonia rubripertincta																												FALSE
GCF_014070455.1	NZ_CP059694.1	region008	FALSE	FALSE	FALSE	FALSE	1223718..1294917	FALSE	Bacteria_Actinobacteria_Corynebacteriales_Gordoniaceae_Gordonia	Gordonia rubripertincta																												FALSE
GCF_010728525.1	NZ_AP022572.1	region007	TRUE	TRUE	FALSE	TRUE	3109909..3181342	FALSE	Bacteria_Actinobacteria_Corynebacteriales_Mycobacteriaceae_Mycobacterium	Mycobacterium shottsii					658	547.1																						FALSE
GCF_014070455.1	NZ_CP059694.1	region010	TRUE	FALSE	FALSE	FALSE	2106189..2159683	FALSE	Bacteria_Actinobacteria_Corynebacteriales_Gordoniaceae_Gordonia	Gordonia rubripertincta																												FALSE
GCF_014070455.1	NZ_CP059694.1	region014	TRUE	FALSE	FALSE	FALSE	3939195..4010194	FALSE	Bacteria_Actinobacteria_Corynebacteriales_Gordoniaceae_Gordonia	Gordonia rubripertincta																												FALSE
GCF_014070455.1	NZ_CP059694.1	region015	TRUE	FALSE	FALSE	FALSE	5009237..5104173	TRUE	Bacteria_Actinobacteria_Corynebacteriales_Gordoniaceae_Gordonia	Gordonia rubripertincta																												FALSE
GCF_010728725.1	NZ_AP022606.1	region008	TRUE	TRUE	FALSE	TRUE	3460934..3574017	FALSE	Bacteria_Actinobacteria_Corynebacteriales_Mycobacteriaceae_Mycobacterium	Mycobacterium branderi					652.2	538.5																						FALSE
GCF_014197435.1	NZ_JACIFP010000001.1	region004	TRUE	FALSE	FALSE	FALSE	1243975..1328892	FALSE	Bacteria_Actinobacteria_Corynebacteriales_Gordoniaceae_Gordonia	Gordonia humi																										61.8	281.2	TRUE
GCF_014197435.1	NZ_JACIFP010000001.1	region005	TRUE	FALSE	TRUE	TRUE	1703664..1745720	FALSE	Bacteria_Actinobacteria_Corynebacteriales_Gordoniaceae_Gordonia	Gordonia humi																												FALSE
GCF_014197435.1	NZ_JACIFP010000001.1	region006	TRUE	FALSE	FALSE	FALSE	<1870500..2016413	FALSE	Bacteria_Actinobacteria_Corynebacteriales_Gordoniaceae_Gordonia	Gordonia humi																										50	283.9	TRUE
GCF_014197435.1	NZ_JACIFP010000001.1	region008	TRUE	FALSE	FALSE	FALSE	3055405..3109107	FALSE	Bacteria_Actinobacteria_Corynebacteriales_Gordoniaceae_Gordonia	Gordonia humi																												FALSE
GCF_014197435.1	NZ_JACIFP010000001.1	region013	TRUE	FALSE	FALSE	FALSE	4641268..4696828	FALSE	Bacteria_Actinobacteria_Corynebacteriales_Gordoniaceae_Gordonia	Gordonia humi																										81.1		FALSE
GCF_014639795.1	NZ_BMGC01000025.1	region001	TRUE	FALSE	FALSE	FALSE	0..52544	TRUE	Bacteria_Actinobacteria_Corynebacteriales_Gordoniaceae_Gordonia	Gordonia jinhuaensis																												FALSE
GCF_010730055.1	NZ_AP022575.1	region003	TRUE	TRUE	FALSE	TRUE	915619..985292	FALSE	Bacteria_Actinobacteria_Corynebacteriales_Mycobacteriaceae_Mycobacterium	Mycobacterium shinjukuense					665.1	555.5																						FALSE
GCF_014673215.1	NZ_JACWMS010000001.1	region002	TRUE	FALSE	FALSE	FALSE	845868..1013083	FALSE	Bacteria_Actinobacteria_Corynebacteriales_Gordoniaceae_Gordonia	Gordonia hankookensis																												FALSE
GCF_014673215.1	NZ_JACWMS010000002.1	region002	TRUE	FALSE	FALSE	FALSE	289096..332548	FALSE	Bacteria_Actinobacteria_Corynebacteriales_Gordoniaceae_Gordonia	Gordonia hankookensis																												FALSE
GCF_010730195.1	NZ_AP022613.1	region012	TRUE	TRUE	FALSE	TRUE	3769913..3884441	FALSE	Bacteria_Actinobacteria_Corynebacteriales_Mycobacteriaceae_Mycobacterium	Mycobacterium conspicuum					664	556																						FALSE
GCF_014673215.1	NZ_JACWMS010000002.1	region007	TRUE	FALSE	FALSE	FALSE	1068891..1115797	FALSE	Bacteria_Actinobacteria_Corynebacteriales_Gordoniaceae_Gordonia	Gordonia hankookensis																										78.5		FALSE
GCF_020735545.1	NZ_CP085974.1	region002	FALSE	FALSE	FALSE	FALSE	1060302..1102139	FALSE	Bacteria_Actinobacteria_Corynebacteriales_Gordoniaceae_Gordonia	Gordonia otitidis																												FALSE
GCF_020735545.1	NZ_CP085974.1	region008	TRUE	FALSE	FALSE	FALSE	3471329..3566593	FALSE	Bacteria_Actinobacteria_Corynebacteriales_Gordoniaceae_Gordonia	Gordonia otitidis																												FALSE
GCF_010731535.1	NZ_AP022581.1	region010	TRUE	TRUE	FALSE	TRUE	2582482..2649188	FALSE	Bacteria_Actinobacteria_Corynebacteriales_Mycobacteriaceae_Mycobacterium	Mycobacterium lacus					668.7	561.5																						FALSE
GCF_022059885.1	NZ_CP091855.1	region001	TRUE	FALSE	FALSE	FALSE	0..34505	TRUE	Bacteria_Actinobacteria_Corynebacteriales_Gordoniaceae_Gordonia	Gordonia amicalis																												FALSE
GCF_022059885.1	NZ_CP091855.1	region003	FALSE	FALSE	FALSE	FALSE	650997..721934	FALSE	Bacteria_Actinobacteria_Corynebacteriales_Gordoniaceae_Gordonia	Gordonia amicalis																												FALSE
GCF_010731595.1	NZ_AP022582.1	region009	TRUE	TRUE	FALSE	TRUE	2311280..2424732	FALSE	Bacteria_Actinobacteria_Corynebacteriales_Mycobacteriaceae_Mycobacterium	Mycobacterium seoulense					758	557																						FALSE
GCF_022059885.1	NZ_CP091855.1	region007	TRUE	FALSE	FALSE	FALSE	1732114..1785578	FALSE	Bacteria_Actinobacteria_Corynebacteriales_Gordoniaceae_Gordonia	Gordonia amicalis																												FALSE
GCF_022059885.1	NZ_CP091855.1	region008	TRUE	FALSE	FALSE	FALSE	2793223..2835296	FALSE	Bacteria_Actinobacteria_Corynebacteriales_Gordoniaceae_Gordonia	Gordonia amicalis																												FALSE
GCF_022059885.1	NZ_CP091855.1	region009	TRUE	FALSE	FALSE	FALSE	2835390..>2879322	FALSE	Bacteria_Actinobacteria_Corynebacteriales_Gordoniaceae_Gordonia	Gordonia amicalis																												FALSE
GCF_022059885.1	NZ_CP091855.1	region013	TRUE	FALSE	FALSE	FALSE	4688389..4799579	FALSE	Bacteria_Actinobacteria_Corynebacteriales_Gordoniaceae_Gordonia	Gordonia amicalis																												FALSE
GCF_022059885.1	NZ_CP091855.1	region015	TRUE	FALSE	FALSE	FALSE	4900423..4958792	FALSE	Bacteria_Actinobacteria_Corynebacteriales_Gordoniaceae_Gordonia	Gordonia amicalis																												FALSE
GCF_023017165.1	NZ_JALKBW010000001.1	region001	TRUE	FALSE	FALSE	FALSE	530378..696051	FALSE	Bacteria_Actinobacteria_Corynebacteriales_Gordoniaceae_Gordonia	Gordonia alkaliphila																												FALSE
GCF_023078355.1	NZ_CP095552.1	region001	FALSE	FALSE	FALSE	FALSE	329519..405268	FALSE	Bacteria_Actinobacteria_Corynebacteriales_Gordoniaceae_Gordonia	Gordonia hongkongensis																												FALSE
GCF_010731635.1	NZ_AP022583.1	region002	TRUE	TRUE	FALSE	TRUE	79108..149910	FALSE	Bacteria_Actinobacteria_Corynebacteriales_Mycobacteriaceae_Mycobacterium	Mycobacterium noviomagense					727.9	547.7																						FALSE
GCF_023078355.1	NZ_CP095552.1	region003	TRUE	FALSE	FALSE	FALSE	1107086..1158314	FALSE	Bacteria_Actinobacteria_Corynebacteriales_Gordoniaceae_Gordonia	Gordonia hongkongensis																												FALSE
GCF_023078355.1	NZ_CP095552.1	region007	TRUE	FALSE	FALSE	FALSE	3096534..3169652	FALSE	Bacteria_Actinobacteria_Corynebacteriales_Gordoniaceae_Gordonia	Gordonia hongkongensis																												FALSE
GCF_023078355.1	NZ_CP095552.1	region008	TRUE	FALSE	FALSE	FALSE	3954052..4081937	FALSE	Bacteria_Actinobacteria_Corynebacteriales_Gordoniaceae_Gordonia	Gordonia hongkongensis																												FALSE
GCF_023078355.1	NZ_CP095552.1	region010	TRUE	FALSE	FALSE	FALSE	4182570..4239946	FALSE	Bacteria_Actinobacteria_Corynebacteriales_Gordoniaceae_Gordonia	Gordonia hongkongensis																												FALSE
GCF_023078355.1	NZ_CP095552.1	region011	TRUE	FALSE	FALSE	FALSE	4452698..4496952	FALSE	Bacteria_Actinobacteria_Corynebacteriales_Gordoniaceae_Gordonia	Gordonia hongkongensis																												FALSE
GCF_023078355.1	NZ_CP095552.1	region012	FALSE	FALSE	FALSE	FALSE	4773952..4817814	FALSE	Bacteria_Actinobacteria_Corynebacteriales_Gordoniaceae_Gordonia	Gordonia hongkongensis																												FALSE
GCF_900105725.1	NZ_FNLM01000034.1	region004	TRUE	FALSE	FALSE	FALSE	1572757..1645048	FALSE	Bacteria_Actinobacteria_Corynebacteriales_Gordoniaceae_Gordonia	Gordonia westfalica																												FALSE
GCF_900105725.1	NZ_FNLM01000034.1	region005	TRUE	FALSE	FALSE	FALSE	2745303..2799379	FALSE	Bacteria_Actinobacteria_Corynebacteriales_Gordoniaceae_Gordonia	Gordonia westfalica																												FALSE
GCF_010731655.1	NZ_AP022619.1	region007	TRUE	TRUE	FALSE	TRUE	2091214..2152048	FALSE	Bacteria_Actinobacteria_Corynebacteriales_Mycobacteriaceae_Mycobacterium	Mycobacterium paraseoulense					758.9																							FALSE
GCF_900105725.1	NZ_FNLM01000034.1	region007	FALSE	FALSE	FALSE	FALSE	3697704..3768537	FALSE	Bacteria_Actinobacteria_Corynebacteriales_Gordoniaceae_Gordonia	Gordonia westfalica																												FALSE
GCF_900105725.1	NZ_FNLM01000036.1	region001	TRUE	FALSE	FALSE	FALSE	385642..426695	FALSE	Bacteria_Actinobacteria_Corynebacteriales_Gordoniaceae_Gordonia	Gordonia westfalica																												FALSE
GCF_900105725.1	NZ_FNLM01000036.1	region002	TRUE	FALSE	FALSE	FALSE	585292..682159	FALSE	Bacteria_Actinobacteria_Corynebacteriales_Gordoniaceae_Gordonia	Gordonia westfalica																												FALSE
GCF_900105725.1	NZ_FNLM01000036.1	region004	TRUE	FALSE	FALSE	FALSE	806379..918507	FALSE	Bacteria_Actinobacteria_Corynebacteriales_Gordoniaceae_Gordonia	Gordonia westfalica																												FALSE
GCF_900683595.1	NZ_CAACYD010000001.1	region001	TRUE	FALSE	FALSE	FALSE	19646..93716	FALSE	Bacteria_Actinobacteria_Corynebacteriales_Gordoniaceae_Gordonia	Gordonia paraffinivorans																												FALSE
GCF_900683595.1	NZ_CAACYD010000006.1	region001	TRUE	FALSE	FALSE	FALSE	135981..238575	FALSE	Bacteria_Actinobacteria_Corynebacteriales_Gordoniaceae_Gordonia	Gordonia paraffinivorans																												FALSE
GCF_010731835.1	NZ_AP022594.1	region001	TRUE	TRUE	FALSE	TRUE	395113..463125	FALSE	Bacteria_Actinobacteria_Corynebacteriales_Mycobacteriaceae_Mycobacterium	Mycobacterium koreense					616.7	540.5																						FALSE
GCF_901542405.1	NZ_CABEIC010000002.1	region001	FALSE	FALSE	FALSE	FALSE	312148..385187	FALSE	Bacteria_Actinobacteria_Corynebacteriales_Gordoniaceae_Gordonia	Gordonia terrae																										88.3	297.1	TRUE
GCF_012223425.1	NZ_CP038799.1	region013	TRUE	TRUE	FALSE	TRUE	4700405..4766454	FALSE	Bacteria_Actinobacteria_Corynebacteriales_Mycobacteriaceae_Mycobacterium	Mycobacterium frederiksbergense					673.2																							FALSE
GCF_901542405.1	NZ_CABEIC010000002.1	region003	TRUE	FALSE	FALSE	FALSE	1233172..1287044	FALSE	Bacteria_Actinobacteria_Corynebacteriales_Gordoniaceae_Gordonia	Gordonia terrae																												FALSE
GCF_901542405.1	NZ_CABEIC010000002.1	region007	TRUE	FALSE	FALSE	FALSE	3193824..3267998	FALSE	Bacteria_Actinobacteria_Corynebacteriales_Gordoniaceae_Gordonia	Gordonia terrae																												FALSE
GCF_901542405.1	NZ_CABEIC010000002.1	region008	TRUE	FALSE	FALSE	FALSE	4274497..4401371	FALSE	Bacteria_Actinobacteria_Corynebacteriales_Gordoniaceae_Gordonia	Gordonia terrae																												FALSE
GCF_901542405.1	NZ_CABEIC010000002.1	region010	TRUE	FALSE	FALSE	FALSE	4503600..4560470	FALSE	Bacteria_Actinobacteria_Corynebacteriales_Gordoniaceae_Gordonia	Gordonia terrae																												FALSE
GCF_901542405.1	NZ_CABEIC010000002.1	region011	FALSE	FALSE	FALSE	FALSE	4560852..4602648	FALSE	Bacteria_Actinobacteria_Corynebacteriales_Gordoniaceae_Gordonia	Gordonia terrae																												FALSE
GCF_901542405.1	NZ_CABEIC010000002.1	region012	TRUE	FALSE	FALSE	FALSE	4826956..4871210	FALSE	Bacteria_Actinobacteria_Corynebacteriales_Gordoniaceae_Gordonia	Gordonia terrae																												FALSE
GCF_000380485.1	NZ_AQYG01000038.1	region001	TRUE	FALSE	FALSE	FALSE	0..110148	TRUE	Bacteria_Actinobacteria_Corynebacteriales_Gordoniaceae_Jongsikchunia	Jongsikchunia kroppenstedtii DSM 45133																												FALSE
GCF_000380485.1	NZ_AQYG01000047.1	region001	TRUE	FALSE	FALSE	FALSE	246839..291129	FALSE	Bacteria_Actinobacteria_Corynebacteriales_Gordoniaceae_Jongsikchunia	Jongsikchunia kroppenstedtii DSM 45133																												FALSE
GCF_000380485.1	NZ_AQYG01000049.1	region002	TRUE	FALSE	FALSE	FALSE	120307..186896	FALSE	Bacteria_Actinobacteria_Corynebacteriales_Gordoniaceae_Jongsikchunia	Jongsikchunia kroppenstedtii DSM 45133																												FALSE
GCF_000380485.1	NZ_AQYG01000050.1	region002	TRUE	FALSE	TRUE	TRUE	77629..120764	FALSE	Bacteria_Actinobacteria_Corynebacteriales_Gordoniaceae_Jongsikchunia	Jongsikchunia kroppenstedtii DSM 45133																												FALSE
GCF_000380485.1	NZ_AQYG01000050.1	region004	TRUE	FALSE	FALSE	FALSE	373343..420409	TRUE	Bacteria_Actinobacteria_Corynebacteriales_Gordoniaceae_Jongsikchunia	Jongsikchunia kroppenstedtii DSM 45133																												FALSE
GCF_000380485.1	NZ_AQYG01000051.1	region002	TRUE	FALSE	FALSE	FALSE	459423..512821	FALSE	Bacteria_Actinobacteria_Corynebacteriales_Gordoniaceae_Jongsikchunia	Jongsikchunia kroppenstedtii DSM 45133																												FALSE
GCF_001552615.1	NZ_BCRN01000002.1	region001	TRUE	FALSE	FALSE	FALSE	102765..148267	FALSE	Bacteria_Actinobacteria_Corynebacteriales_Gordoniaceae_Millisia	Millisia brevis NBRC 105863																												FALSE
GCF_013466425.1	NZ_CP059165.1	region012	TRUE	TRUE	FALSE	TRUE	4117659..4237619	FALSE	Bacteria_Actinobacteria_Corynebacteriales_Mycobacteriaceae_Mycobacterium	Mycobacterium vicinigordonae					650.3	548.6																						FALSE
GCF_016745295.1	NZ_CP058277.1	region026	TRUE	TRUE	FALSE	TRUE	5783043..5854476	FALSE	Bacteria_Actinobacteria_Corynebacteriales_Mycobacteriaceae_Mycobacterium	Mycobacterium marinum					661.8	547.4																						FALSE
GCF_001552615.1	NZ_BCRN01000007.1	region001	TRUE	FALSE	FALSE	FALSE	100770..242980	FALSE	Bacteria_Actinobacteria_Corynebacteriales_Gordoniaceae_Millisia	Millisia brevis NBRC 105863																												FALSE
GCF_001552615.1	NZ_BCRN01000008.1	region002	FALSE	FALSE	FALSE	FALSE	149321..191673	FALSE	Bacteria_Actinobacteria_Corynebacteriales_Gordoniaceae_Millisia	Millisia brevis NBRC 105863																												FALSE
GCF_001552615.1	NZ_BCRN01000011.1	region001	TRUE	FALSE	FALSE	FALSE	129091..201272	TRUE	Bacteria_Actinobacteria_Corynebacteriales_Gordoniaceae_Millisia	Millisia brevis NBRC 105863																												FALSE
GCF_001552615.1	NZ_BCRN01000012.1	region002	TRUE	FALSE	FALSE	FALSE	114448..164525	FALSE	Bacteria_Actinobacteria_Corynebacteriales_Gordoniaceae_Millisia	Millisia brevis NBRC 105863																												FALSE
GCF_016861545.1	NZ_AP024310.1	region006	TRUE	TRUE	FALSE	TRUE	2004274..2075090	FALSE	Bacteria_Actinobacteria_Corynebacteriales_Mycobacteriaceae_Mycobacterium	Mycobacterium heckeshornense					733	548.6																						FALSE
GCF_001552615.1	NZ_BCRN01000025.1	region001	TRUE	FALSE	FALSE	FALSE	27200..55966	TRUE	Bacteria_Actinobacteria_Corynebacteriales_Gordoniaceae_Millisia	Millisia brevis NBRC 105863																												FALSE
GCF_001552615.1	NZ_BCRN01000035.1	region001	TRUE	FALSE	FALSE	FALSE	0..11922	TRUE	Bacteria_Actinobacteria_Corynebacteriales_Gordoniaceae_Millisia	Millisia brevis NBRC 105863																												FALSE
GCF_001552615.1	NZ_BCRN01000049.1	region001	FALSE	FALSE	FALSE	FALSE	0..1137	TRUE	Bacteria_Actinobacteria_Corynebacteriales_Gordoniaceae_Millisia	Millisia brevis NBRC 105863																												FALSE
GCF_019285775.1	NZ_CP079105.1	region001	TRUE	FALSE	FALSE	FALSE	18089..59671	FALSE	Bacteria_Actinobacteria_Corynebacteriales_Gordoniaceae_Skermania	Skermania piniformis																												FALSE
GCF_019285775.1	NZ_CP079105.1	region006	TRUE	FALSE	FALSE	FALSE	802908..877485	FALSE	Bacteria_Actinobacteria_Corynebacteriales_Gordoniaceae_Skermania	Skermania piniformis																												FALSE
GCF_019285775.1	NZ_CP079105.1	region011	TRUE	FALSE	TRUE	TRUE	3409847..3461497	FALSE	Bacteria_Actinobacteria_Corynebacteriales_Gordoniaceae_Skermania	Skermania piniformis																										65.5	275.6	TRUE
GCF_019285775.1	NZ_CP079105.1	region012	FALSE	FALSE	FALSE	FALSE	3865066..3905577	FALSE	Bacteria_Actinobacteria_Corynebacteriales_Gordoniaceae_Skermania	Skermania piniformis																												FALSE
GCF_019285775.1	NZ_CP079105.1	region013	TRUE	FALSE	FALSE	FALSE	3966062..4035514	FALSE	Bacteria_Actinobacteria_Corynebacteriales_Gordoniaceae_Skermania	Skermania piniformis			371.9																									FALSE
GCF_018278905.1	NZ_CP046600.1	region012	TRUE	TRUE	FALSE	TRUE	3666564..3733168	FALSE	Bacteria_Actinobacteria_Corynebacteriales_Mycobacteriaceae_Mycobacterium	Mycobacterium spongiae					763.5																							FALSE
GCF_001293125.1	NZ_CP009312.1	region001	TRUE	FALSE	FALSE	FALSE	839408..928353	FALSE	Bacteria_Actinobacteria_Corynebacteriales_Lawsonellaceae_Lawsonella	Lawsonella clevelandensis																												FALSE
GCF_019456655.1	NZ_CP080332.1	region009	TRUE	TRUE	FALSE	TRUE	3952770..4019681	FALSE	Bacteria_Actinobacteria_Corynebacteriales_Mycobacteriaceae_Mycobacterium	Mycobacterium diernhoferi					673																							FALSE
GCF_000214175.1	NC_015564.1	region003	TRUE	FALSE	FALSE	FALSE	444928..521726	FALSE	Bacteria_Actinobacteria_Corynebacteriales_Mycobacteriaceae_Hoyosella	Hoyosella subflava DQS3-9A1																												FALSE
GCF_000214175.1	NC_015564.1	region009	FALSE	FALSE	FALSE	FALSE	3904709..3946734	FALSE	Bacteria_Actinobacteria_Corynebacteriales_Mycobacteriaceae_Hoyosella	Hoyosella subflava DQS3-9A1																										42.4		FALSE
GCF_000214175.1	NC_015564.1	region010	TRUE	FALSE	FALSE	FALSE	4125762..4178994	FALSE	Bacteria_Actinobacteria_Corynebacteriales_Mycobacteriaceae_Hoyosella	Hoyosella subflava DQS3-9A1																												FALSE
GCF_000214175.1	NC_015564.1	region014	TRUE	FALSE	FALSE	FALSE	4533350..4595796	FALSE	Bacteria_Actinobacteria_Corynebacteriales_Mycobacteriaceae_Hoyosella	Hoyosella subflava DQS3-9A1																												FALSE
GCF_001653095.1	NZ_BDDI01000001.1	region001	TRUE	FALSE	FALSE	FALSE	111488..173658	FALSE	Bacteria_Actinobacteria_Corynebacteriales_Mycobacteriaceae_Hoyosella	Hoyosella altamirensis																												FALSE
GCF_001653095.1	NZ_BDDI01000009.1	region001	FALSE	FALSE	FALSE	FALSE	0..32920	TRUE	Bacteria_Actinobacteria_Corynebacteriales_Mycobacteriaceae_Hoyosella	Hoyosella altamirensis																										46.1		FALSE
GCF_001653095.1	NZ_BDDI01000011.1	region001	TRUE	FALSE	FALSE	FALSE	90687..164731	FALSE	Bacteria_Actinobacteria_Corynebacteriales_Mycobacteriaceae_Hoyosella	Hoyosella altamirensis																												FALSE
GCF_019456675.1	NZ_CP080333.1	region002	TRUE	TRUE	FALSE	TRUE	392455..450913	FALSE	Bacteria_Actinobacteria_Corynebacteriales_Mycobacteriaceae_Mycobacterium	Mycobacterium pallens					669	531.4																						FALSE
GCF_019645835.1	NZ_CP080998.1	region005	TRUE	TRUE	FALSE	TRUE	2016324..2083541	FALSE	Bacteria_Actinobacteria_Corynebacteriales_Mycobacteriaceae_Mycobacterium	Mycobacterium holsaticum					699.2																							FALSE
GCF_008312885.1	NZ_VSSO01000002.1	region003	TRUE	FALSE	FALSE	FALSE	482007..555478	FALSE	Bacteria_Actinobacteria_Corynebacteriales_Mycobacteriaceae_Hoyosella	Hoyosella suaedae																												FALSE
GCF_008312885.1	NZ_VSSO01000003.1	region001	FALSE	FALSE	FALSE	FALSE	155591..199047	FALSE	Bacteria_Actinobacteria_Corynebacteriales_Mycobacteriaceae_Hoyosella	Hoyosella suaedae																												FALSE
GCF_008312885.1	NZ_VSSO01000005.1	region001	TRUE	FALSE	FALSE	FALSE	71184..133210	FALSE	Bacteria_Actinobacteria_Corynebacteriales_Mycobacteriaceae_Hoyosella	Hoyosella suaedae																												FALSE
GCF_019645855.1	NZ_CP080999.1	region009	TRUE	TRUE	FALSE	TRUE	3371332..3487485	FALSE	Bacteria_Actinobacteria_Corynebacteriales_Mycobacteriaceae_Mycobacterium	Mycobacterium malmoense					765.2	552.4																						FALSE
GCF_014643175.1	NZ_BMJH01000001.1	region002	TRUE	FALSE	FALSE	FALSE	291988..350634	FALSE	Bacteria_Actinobacteria_Corynebacteriales_Mycobacteriaceae_Hoyosella	Hoyosella rhizosphaerae																												FALSE
GCF_014643175.1	NZ_BMJH01000001.1	region005	TRUE	FALSE	FALSE	FALSE	1371558..1433617	FALSE	Bacteria_Actinobacteria_Corynebacteriales_Mycobacteriaceae_Hoyosella	Hoyosella rhizosphaerae																												FALSE
GCF_014643175.1	NZ_BMJH01000005.1	region001	TRUE	FALSE	FALSE	FALSE	16894..57359	TRUE	Bacteria_Actinobacteria_Corynebacteriales_Mycobacteriaceae_Hoyosella	Hoyosella rhizosphaerae																												FALSE
GCF_014643175.1	NZ_BMJH01000008.1	region001	TRUE	FALSE	FALSE	FALSE	0..9621	TRUE	Bacteria_Actinobacteria_Corynebacteriales_Mycobacteriaceae_Hoyosella	Hoyosella rhizosphaerae																												FALSE
GCF_014643175.1	NZ_BMJH01000009.1	region001	TRUE	FALSE	FALSE	FALSE	0..9594	TRUE	Bacteria_Actinobacteria_Corynebacteriales_Mycobacteriaceae_Hoyosella	Hoyosella rhizosphaerae																												FALSE
GCF_014841105.1	NZ_JACYWE010000001.1	region001	FALSE	FALSE	TRUE	TRUE	7340..19122	FALSE	Bacteria_Actinobacteria_Corynebacteriales_Mycobacteriaceae_Hoyosella	Hoyosella lacisalsi																												FALSE
GCF_014841105.1	NZ_JACYWE010000001.1	region003	TRUE	FALSE	FALSE	FALSE	310985..357238	FALSE	Bacteria_Actinobacteria_Corynebacteriales_Mycobacteriaceae_Hoyosella	Hoyosella lacisalsi																												FALSE
GCF_014841105.1	NZ_JACYWE010000003.1	region001	FALSE	FALSE	FALSE	FALSE	247747..291188	FALSE	Bacteria_Actinobacteria_Corynebacteriales_Mycobacteriaceae_Hoyosella	Hoyosella lacisalsi																												FALSE
GCF_014841105.1	NZ_JACYWE010000005.1	region001	TRUE	FALSE	FALSE	FALSE	257517..284693	TRUE	Bacteria_Actinobacteria_Corynebacteriales_Mycobacteriaceae_Hoyosella	Hoyosella lacisalsi																												FALSE
GCF_014841105.1	NZ_JACYWE010000008.1	region001	TRUE	FALSE	FALSE	FALSE	32393..135526	FALSE	Bacteria_Actinobacteria_Corynebacteriales_Mycobacteriaceae_Hoyosella	Hoyosella lacisalsi																												FALSE
GCF_014841105.1	NZ_JACYWE010000009.1	region001	TRUE	FALSE	FALSE	FALSE	169719..199162	TRUE	Bacteria_Actinobacteria_Corynebacteriales_Mycobacteriaceae_Hoyosella	Hoyosella lacisalsi																												FALSE
GCF_014841105.1	NZ_JACYWE010000011.1	region001	TRUE	FALSE	FALSE	FALSE	16671..57115	TRUE	Bacteria_Actinobacteria_Corynebacteriales_Mycobacteriaceae_Hoyosella	Hoyosella lacisalsi																												FALSE
GCF_014841105.1	NZ_JACYWE010000014.1	region001	TRUE	FALSE	FALSE	FALSE	0..10701	TRUE	Bacteria_Actinobacteria_Corynebacteriales_Mycobacteriaceae_Hoyosella	Hoyosella lacisalsi																												FALSE
GCF_014841105.1	NZ_JACYWE010000017.1	region001	TRUE	FALSE	FALSE	FALSE	0..9208	TRUE	Bacteria_Actinobacteria_Corynebacteriales_Mycobacteriaceae_Hoyosella	Hoyosella lacisalsi																												FALSE
GCF_014841105.1	NZ_JACYWE010000019.1	region001	TRUE	FALSE	FALSE	FALSE	0..3054	TRUE	Bacteria_Actinobacteria_Corynebacteriales_Mycobacteriaceae_Hoyosella	Hoyosella lacisalsi																												FALSE
GCF_000157895.3	NC_022663.1	region002	TRUE	FALSE	FALSE	FALSE	<456419..523246	FALSE	Bacteria_Actinobacteria_Corynebacteriales_Mycobacteriaceae_Mycobacterium	Mycobacterium kansasii ATCC 12478																												FALSE
GCF_019645875.1	NZ_CP081000.1	region009	TRUE	TRUE	FALSE	TRUE	3506741..3575863	FALSE	Bacteria_Actinobacteria_Corynebacteriales_Mycobacteriaceae_Mycobacterium	Mycobacterium senegalense					695	518.9																						FALSE
GCF_020616615.1	NZ_CP085200.1	region004	TRUE	TRUE	FALSE	TRUE	1590556..1660234	FALSE	Bacteria_Actinobacteria_Corynebacteriales_Mycobacteriaceae_Mycobacterium	Mycobacterium ulcerans					658.5	544.8																						FALSE
GCF_000157895.3	NC_022663.1	region006	TRUE	FALSE	FALSE	FALSE	1867044..1924839	FALSE	Bacteria_Actinobacteria_Corynebacteriales_Mycobacteriaceae_Mycobacterium	Mycobacterium kansasii ATCC 12478																												FALSE
GCF_000157895.3	NC_022663.1	region007	TRUE	FALSE	FALSE	FALSE	2312024..2358031	FALSE	Bacteria_Actinobacteria_Corynebacteriales_Mycobacteriaceae_Mycobacterium	Mycobacterium kansasii ATCC 12478																												FALSE
GCF_000157895.3	NC_022663.1	region009	TRUE	FALSE	FALSE	FALSE	2444196..2486530	FALSE	Bacteria_Actinobacteria_Corynebacteriales_Mycobacteriaceae_Mycobacterium	Mycobacterium kansasii ATCC 12478																												FALSE
GCF_000157895.3	NC_022663.1	region010	TRUE	FALSE	FALSE	FALSE	2800650..2844968	FALSE	Bacteria_Actinobacteria_Corynebacteriales_Mycobacteriaceae_Mycobacterium	Mycobacterium kansasii ATCC 12478																												FALSE
GCF_000157895.3	NC_022663.1	region012	FALSE	FALSE	FALSE	FALSE	3858120..3899820	FALSE	Bacteria_Actinobacteria_Corynebacteriales_Mycobacteriaceae_Mycobacterium	Mycobacterium kansasii ATCC 12478																												FALSE
GCF_000157895.3	NC_022663.1	region015	TRUE	FALSE	FALSE	FALSE	4782581..4848715	FALSE	Bacteria_Actinobacteria_Corynebacteriales_Mycobacteriaceae_Mycobacterium	Mycobacterium kansasii ATCC 12478																												FALSE
GCF_000157895.3	NC_022663.1	region017	FALSE	FALSE	FALSE	FALSE	5236611..5361656	FALSE	Bacteria_Actinobacteria_Corynebacteriales_Mycobacteriaceae_Mycobacterium	Mycobacterium kansasii ATCC 12478																												FALSE
GCF_000157895.3	NC_022663.1	region018	FALSE	FALSE	FALSE	FALSE	5666273..5708198	FALSE	Bacteria_Actinobacteria_Corynebacteriales_Mycobacteriaceae_Mycobacterium	Mycobacterium kansasii ATCC 12478																												FALSE
GCF_000157895.3	NC_022663.1	region019	FALSE	FALSE	FALSE	FALSE	5717541..5758690	FALSE	Bacteria_Actinobacteria_Corynebacteriales_Mycobacteriaceae_Mycobacterium	Mycobacterium kansasii ATCC 12478																												FALSE
GCF_000157895.3	NC_022663.1	region021	TRUE	FALSE	FALSE	FALSE	5850145..5902424	FALSE	Bacteria_Actinobacteria_Corynebacteriales_Mycobacteriaceae_Mycobacterium	Mycobacterium kansasii ATCC 12478																												FALSE
GCF_000340435.2	NZ_CP011883.2	region003	FALSE	FALSE	FALSE	FALSE	1728110..>1770468	FALSE	Bacteria_Actinobacteria_Corynebacteriales_Mycobacteriaceae_Mycobacterium	Mycobacterium haemophilum DSM 44634																												FALSE
GCF_000340435.2	NZ_CP011883.2	region009	FALSE	FALSE	FALSE	FALSE	3962352..4079377	FALSE	Bacteria_Actinobacteria_Corynebacteriales_Mycobacteriaceae_Mycobacterium	Mycobacterium haemophilum DSM 44634																												FALSE
GCF_000613245.1	NZ_HG964936.1	region003	FALSE	FALSE	FALSE	FALSE	1800956..1848188	FALSE	Bacteria_Actinobacteria_Corynebacteriales_Mycobacteriaceae_Mycobacterium	Mycobacterium asiaticum DSM 44297																												FALSE
GCF_021183725.1	NZ_CP089224.1	region004	TRUE	TRUE	FALSE	TRUE	814329..864266	FALSE	Bacteria_Actinobacteria_Corynebacteriales_Mycobacteriaceae_Mycobacterium	Mycobacterium ostraviense					705.7																							FALSE
GCF_000613245.1	NZ_HG964937.1	region005	TRUE	FALSE	FALSE	FALSE	1694974..1791821	FALSE	Bacteria_Actinobacteria_Corynebacteriales_Mycobacteriaceae_Mycobacterium	Mycobacterium asiaticum DSM 44297																												FALSE
GCF_000613245.1	NZ_HG964938.1	region001	FALSE	FALSE	FALSE	FALSE	178556..221763	FALSE	Bacteria_Actinobacteria_Corynebacteriales_Mycobacteriaceae_Mycobacterium	Mycobacterium asiaticum DSM 44297																												FALSE
GCF_000613245.1	NZ_HG964938.1	region002	FALSE	FALSE	FALSE	FALSE	242109..285502	FALSE	Bacteria_Actinobacteria_Corynebacteriales_Mycobacteriaceae_Mycobacterium	Mycobacterium asiaticum DSM 44297																												FALSE
GCF_000975265.2	NZ_CP083405.1	region002	FALSE	FALSE	FALSE	FALSE	158042..217888	FALSE	Bacteria_Actinobacteria_Corynebacteriales_Mycobacteriaceae_Mycobacterium	Mycobacterium lepromatosis																												FALSE
GCF_000975265.2	NZ_CP083405.1	region003	FALSE	FALSE	FALSE	FALSE	645757..>686939	FALSE	Bacteria_Actinobacteria_Corynebacteriales_Mycobacteriaceae_Mycobacterium	Mycobacterium lepromatosis																												FALSE
GCF_000975265.2	NZ_CP083405.1	region006	FALSE	FALSE	FALSE	FALSE	3065736..3109942	FALSE	Bacteria_Actinobacteria_Corynebacteriales_Mycobacteriaceae_Mycobacterium	Mycobacterium lepromatosis																												FALSE
GCF_021183725.1	NZ_CP089224.1	region005	TRUE	TRUE	FALSE	TRUE	1303928..1388626	FALSE	Bacteria_Actinobacteria_Corynebacteriales_Mycobacteriaceae_Mycobacterium	Mycobacterium ostraviense					668.5	526.9																						FALSE
GCF_001021495.1	NZ_LDPP01000010.1	region001	TRUE	FALSE	FALSE	FALSE	0..65013	TRUE	Bacteria_Actinobacteria_Corynebacteriales_Mycobacteriaceae_Mycobacterium	Mycobacterium nebraskense																												FALSE
GCF_001021495.1	NZ_LDPP01000013.1	region001	TRUE	FALSE	FALSE	FALSE	106531..140632	TRUE	Bacteria_Actinobacteria_Corynebacteriales_Mycobacteriaceae_Mycobacterium	Mycobacterium nebraskense																												FALSE
GCF_001021495.1	NZ_LDPP01000015.1	region001	TRUE	FALSE	FALSE	FALSE	52804..132003	TRUE	Bacteria_Actinobacteria_Corynebacteriales_Mycobacteriaceae_Mycobacterium	Mycobacterium nebraskense																												FALSE
GCF_001021495.1	NZ_LDPP01000018.1	region001	TRUE	FALSE	FALSE	FALSE	77423..119739	TRUE	Bacteria_Actinobacteria_Corynebacteriales_Mycobacteriaceae_Mycobacterium	Mycobacterium nebraskense																												FALSE
GCF_001021495.1	NZ_LDPP01000019.1	region001	FALSE	FALSE	FALSE	FALSE	41423..84672	FALSE	Bacteria_Actinobacteria_Corynebacteriales_Mycobacteriaceae_Mycobacterium	Mycobacterium nebraskense																												FALSE
GCF_001021495.1	NZ_LDPP01000020.1	region001	FALSE	FALSE	FALSE	FALSE	34893..78403	FALSE	Bacteria_Actinobacteria_Corynebacteriales_Mycobacteriaceae_Mycobacterium	Mycobacterium nebraskense																												FALSE
GCF_001021495.1	NZ_LDPP01000029.1	region001	TRUE	FALSE	FALSE	FALSE	0..25720	TRUE	Bacteria_Actinobacteria_Corynebacteriales_Mycobacteriaceae_Mycobacterium	Mycobacterium nebraskense																												FALSE
GCF_001021495.1	NZ_LDPP01000034.1	region001	FALSE	FALSE	FALSE	FALSE	<0..24848	TRUE	Bacteria_Actinobacteria_Corynebacteriales_Mycobacteriaceae_Mycobacterium	Mycobacterium nebraskense																												FALSE
GCF_001021495.1	NZ_LDPP01000034.1	region002	FALSE	FALSE	FALSE	FALSE	25228..67940	FALSE	Bacteria_Actinobacteria_Corynebacteriales_Mycobacteriaceae_Mycobacterium	Mycobacterium nebraskense																												FALSE
GCF_001021495.1	NZ_LDPP01000035.1	region001	TRUE	FALSE	FALSE	FALSE	30620..71286	TRUE	Bacteria_Actinobacteria_Corynebacteriales_Mycobacteriaceae_Mycobacterium	Mycobacterium nebraskense																												FALSE
GCF_001021495.1	NZ_LDPP01000127.1	region001	TRUE	FALSE	FALSE	FALSE	0..2054	TRUE	Bacteria_Actinobacteria_Corynebacteriales_Mycobacteriaceae_Mycobacterium	Mycobacterium nebraskense																												FALSE
GCF_001021505.1	NZ_LDPO01000007.1	region002	FALSE	FALSE	FALSE	FALSE	89357..132873	FALSE	Bacteria_Actinobacteria_Corynebacteriales_Mycobacteriaceae_Mycobacterium	Mycobacterium heraklionense																												FALSE
GCF_022370635.1	NZ_CP092362.1	region002	TRUE	TRUE	FALSE	TRUE	498571..557029	FALSE	Bacteria_Actinobacteria_Corynebacteriales_Mycobacteriaceae_Mycobacterium	Mycobacterium crocinum					667.4	535																						FALSE
GCF_001021505.1	NZ_LDPO01000010.1	region001	TRUE	FALSE	FALSE	FALSE	33894..86421	FALSE	Bacteria_Actinobacteria_Corynebacteriales_Mycobacteriaceae_Mycobacterium	Mycobacterium heraklionense																												FALSE
GCF_022370755.1	NZ_CP092364.1	region001	TRUE	TRUE	FALSE	TRUE	2129..66113	FALSE	Bacteria_Actinobacteria_Corynebacteriales_Mycobacteriaceae_Mycobacterium	Mycobacterium goodii	545.1																									88.3	291.6	TRUE
GCF_001439515.1	NZ_LLXQ01000001.1	region001	FALSE	FALSE	FALSE	FALSE	58469..102018	FALSE	Bacteria_Actinobacteria_Corynebacteriales_Mycobacteriaceae_Mycobacterium	Mycobacterium kyorinense																												FALSE
GCF_001439515.1	NZ_LLXQ01000006.1	region002	FALSE	FALSE	FALSE	FALSE	117738..161269	FALSE	Bacteria_Actinobacteria_Corynebacteriales_Mycobacteriaceae_Mycobacterium	Mycobacterium kyorinense																												FALSE
GCF_001439515.1	NZ_LLXQ01000007.1	region001	FALSE	FALSE	FALSE	FALSE	68257..111713	FALSE	Bacteria_Actinobacteria_Corynebacteriales_Mycobacteriaceae_Mycobacterium	Mycobacterium kyorinense																												FALSE
GCF_022370755.1	NZ_CP092364.1	region013	TRUE	TRUE	FALSE	TRUE	4430832..4498270	FALSE	Bacteria_Actinobacteria_Corynebacteriales_Mycobacteriaceae_Mycobacterium	Mycobacterium goodii					692.2																							FALSE
GCF_001439515.1	NZ_LLXQ01000036.1	region001	FALSE	FALSE	FALSE	FALSE	24953..68193	FALSE	Bacteria_Actinobacteria_Corynebacteriales_Mycobacteriaceae_Mycobacterium	Mycobacterium kyorinense																												FALSE
GCF_001439515.1	NZ_LLXQ01000048.1	region001	TRUE	FALSE	FALSE	FALSE	9397..34260	TRUE	Bacteria_Actinobacteria_Corynebacteriales_Mycobacteriaceae_Mycobacterium	Mycobacterium kyorinense																												FALSE
GCF_001439515.1	NZ_LLXQ01000052.1	region001	TRUE	FALSE	FALSE	FALSE	0..34303	TRUE	Bacteria_Actinobacteria_Corynebacteriales_Mycobacteriaceae_Mycobacterium	Mycobacterium kyorinense																												FALSE
GCF_001439515.1	NZ_LLXQ01000060.1	region001	TRUE	FALSE	FALSE	FALSE	0..28669	TRUE	Bacteria_Actinobacteria_Corynebacteriales_Mycobacteriaceae_Mycobacterium	Mycobacterium kyorinense																												FALSE
GCF_001439515.1	NZ_LLXQ01000065.1	region001	TRUE	FALSE	FALSE	FALSE	0..26986	TRUE	Bacteria_Actinobacteria_Corynebacteriales_Mycobacteriaceae_Mycobacterium	Mycobacterium kyorinense																												FALSE
GCF_001439515.1	NZ_LLXQ01000082.1	region001	TRUE	FALSE	FALSE	FALSE	0..12093	TRUE	Bacteria_Actinobacteria_Corynebacteriales_Mycobacteriaceae_Mycobacterium	Mycobacterium kyorinense																												FALSE
GCF_001439515.1	NZ_LLXQ01000092.1	region001	TRUE	FALSE	FALSE	FALSE	0..8455	TRUE	Bacteria_Actinobacteria_Corynebacteriales_Mycobacteriaceae_Mycobacterium	Mycobacterium kyorinense																												FALSE
GCF_001439515.1	NZ_LLXQ01000093.1	region001	TRUE	FALSE	FALSE	FALSE	0..6129	TRUE	Bacteria_Actinobacteria_Corynebacteriales_Mycobacteriaceae_Mycobacterium	Mycobacterium kyorinense																												FALSE
GCF_001439515.1	NZ_LLXQ01000096.1	region001	TRUE	FALSE	FALSE	FALSE	0..4533	TRUE	Bacteria_Actinobacteria_Corynebacteriales_Mycobacteriaceae_Mycobacterium	Mycobacterium kyorinense																												FALSE
GCF_001499925.1	NZ_LQIR01000019.1	region001	TRUE	FALSE	FALSE	FALSE	0..40651	TRUE	Bacteria_Actinobacteria_Corynebacteriales_Mycobacteriaceae_Mycobacterium	Mycobacterium lehmannii																												FALSE
GCF_001499925.1	NZ_LQIR01000023.1	region001	TRUE	FALSE	FALSE	FALSE	0..43452	TRUE	Bacteria_Actinobacteria_Corynebacteriales_Mycobacteriaceae_Mycobacterium	Mycobacterium lehmannii																												FALSE
GCF_001499925.1	NZ_LQIR01000034.1	region002	FALSE	FALSE	FALSE	FALSE	309555..352054	FALSE	Bacteria_Actinobacteria_Corynebacteriales_Mycobacteriaceae_Mycobacterium	Mycobacterium lehmannii																												FALSE
GCF_022374875.1	NZ_CP092427.1	region011	TRUE	TRUE	FALSE	TRUE	3152958..3218410	FALSE	Bacteria_Actinobacteria_Corynebacteriales_Mycobacteriaceae_Mycobacterium	Mycobacterium rufum	541.1																									71.2	278.3	TRUE
GCF_001499925.1	NZ_LQIR01000041.1	region001	FALSE	FALSE	FALSE	FALSE	0..13007	TRUE	Bacteria_Actinobacteria_Corynebacteriales_Mycobacteriaceae_Mycobacterium	Mycobacterium lehmannii																												FALSE
GCF_001499925.1	NZ_LQIR01000047.1	region001	TRUE	FALSE	FALSE	FALSE	0..4365	TRUE	Bacteria_Actinobacteria_Corynebacteriales_Mycobacteriaceae_Mycobacterium	Mycobacterium lehmannii																												FALSE
GCF_001854525.1	NZ_MLQM01000014.1	region001	FALSE	FALSE	FALSE	FALSE	16881..51308	TRUE	Bacteria_Actinobacteria_Corynebacteriales_Mycobacteriaceae_Mycobacterium	Mycobacterium talmoniae																												FALSE
GCF_001854525.1	NZ_MLQM01000020.1	region001	FALSE	FALSE	FALSE	FALSE	9433..46880	TRUE	Bacteria_Actinobacteria_Corynebacteriales_Mycobacteriaceae_Mycobacterium	Mycobacterium talmoniae																												FALSE
GCF_001854525.1	NZ_MLQM01000032.1	region001	TRUE	FALSE	FALSE	FALSE	14809..37293	TRUE	Bacteria_Actinobacteria_Corynebacteriales_Mycobacteriaceae_Mycobacterium	Mycobacterium talmoniae																												FALSE
GCF_001854525.1	NZ_MLQM01000075.1	region001	TRUE	FALSE	FALSE	FALSE	0..23090	TRUE	Bacteria_Actinobacteria_Corynebacteriales_Mycobacteriaceae_Mycobacterium	Mycobacterium talmoniae																												FALSE
GCF_022374935.1	NZ_CP092430.1	region003	TRUE	TRUE	FALSE	TRUE	1705659..1785530	FALSE	Bacteria_Actinobacteria_Corynebacteriales_Mycobacteriaceae_Mycobacterium	Mycobacterium virginiense					717	558.9																						FALSE
GCF_022430545.1	NZ_CP092488.1	region008	TRUE	TRUE	FALSE	TRUE	1850890..1930826	FALSE	Bacteria_Actinobacteria_Corynebacteriales_Mycobacteriaceae_Mycobacterium	Mycobacterium paraterrae					726.9	539.4																						FALSE
GCF_001854525.1	NZ_MLQM01000153.1	region001	FALSE	FALSE	FALSE	FALSE	0..12711	TRUE	Bacteria_Actinobacteria_Corynebacteriales_Mycobacteriaceae_Mycobacterium	Mycobacterium talmoniae																												FALSE
GCF_001854525.1	NZ_MLQM01000186.1	region001	TRUE	FALSE	FALSE	FALSE	0..10830	TRUE	Bacteria_Actinobacteria_Corynebacteriales_Mycobacteriaceae_Mycobacterium	Mycobacterium talmoniae																												FALSE
GCF_001854525.1	NZ_MLQM01000195.1	region001	TRUE	FALSE	FALSE	FALSE	0..9990	TRUE	Bacteria_Actinobacteria_Corynebacteriales_Mycobacteriaceae_Mycobacterium	Mycobacterium talmoniae																												FALSE
GCF_001854525.1	NZ_MLQM01000222.1	region001	FALSE	FALSE	FALSE	FALSE	0..7325	TRUE	Bacteria_Actinobacteria_Corynebacteriales_Mycobacteriaceae_Mycobacterium	Mycobacterium talmoniae																												FALSE
GCF_001907675.1	NZ_MPNT01000001.1	region001	FALSE	FALSE	FALSE	FALSE	431537..474777	FALSE	Bacteria_Actinobacteria_Corynebacteriales_Mycobacteriaceae_Mycobacterium	Mycobacterium paraffinicum																												FALSE
GCF_001907675.1	NZ_MPNT01000002.1	region002	TRUE	FALSE	FALSE	FALSE	341225..371318	TRUE	Bacteria_Actinobacteria_Corynebacteriales_Mycobacteriaceae_Mycobacterium	Mycobacterium paraffinicum																												FALSE
GCF_001907675.1	NZ_MPNT01000004.1	region001	TRUE	FALSE	FALSE	FALSE	17972..75857	FALSE	Bacteria_Actinobacteria_Corynebacteriales_Mycobacteriaceae_Mycobacterium	Mycobacterium paraffinicum																												FALSE
GCF_900157365.1	NZ_FUEZ01000004.1	region006	TRUE	TRUE	FALSE	TRUE	2414875..2484781	FALSE	Bacteria_Actinobacteria_Corynebacteriales_Mycobacteriaceae_Mycobacterium	Mycobacterium numidiamassiliense					767.4	551.9																						FALSE
GCF_001907675.1	NZ_MPNT01000009.1	region001	TRUE	FALSE	FALSE	FALSE	0..43945	TRUE	Bacteria_Actinobacteria_Corynebacteriales_Mycobacteriaceae_Mycobacterium	Mycobacterium paraffinicum																												FALSE
GCF_001907675.1	NZ_MPNT01000022.1	region001	TRUE	FALSE	FALSE	FALSE	0..36804	TRUE	Bacteria_Actinobacteria_Corynebacteriales_Mycobacteriaceae_Mycobacterium	Mycobacterium paraffinicum																												FALSE
GCF_001907675.1	NZ_MPNT01000026.1	region001	FALSE	FALSE	FALSE	FALSE	52739..78945	TRUE	Bacteria_Actinobacteria_Corynebacteriales_Mycobacteriaceae_Mycobacterium	Mycobacterium paraffinicum																												FALSE
GCF_001907675.1	NZ_MPNT01000029.1	region001	FALSE	FALSE	FALSE	FALSE	26031..69535	FALSE	Bacteria_Actinobacteria_Corynebacteriales_Mycobacteriaceae_Mycobacterium	Mycobacterium paraffinicum																												FALSE
GCF_001907675.1	NZ_MPNT01000056.1	region001	TRUE	FALSE	FALSE	FALSE	0..23558	TRUE	Bacteria_Actinobacteria_Corynebacteriales_Mycobacteriaceae_Mycobacterium	Mycobacterium paraffinicum																												FALSE
GCF_001907675.1	NZ_MPNT01000069.1	region001	TRUE	FALSE	FALSE	FALSE	0..4089	TRUE	Bacteria_Actinobacteria_Corynebacteriales_Mycobacteriaceae_Mycobacterium	Mycobacterium paraffinicum																												FALSE
GCF_900157375.1	NZ_LT721901.1	region011	TRUE	TRUE	FALSE	TRUE	3881453..3952439	FALSE	Bacteria_Actinobacteria_Corynebacteriales_Mycobacteriaceae_Mycobacterium	Mycobacterium rhizamassiliense					764.6	536.2																						FALSE
GCF_001942625.1	NZ_MLCL01000034.1	region001	TRUE	FALSE	FALSE	FALSE	0..9030	TRUE	Bacteria_Actinobacteria_Corynebacteriales_Mycobacteriaceae_Mycobacterium	Mycobacterium syngnathidarum																												FALSE
GCF_001942625.1	NZ_MLCL01000038.1	region001	TRUE	FALSE	FALSE	FALSE	0..15425	TRUE	Bacteria_Actinobacteria_Corynebacteriales_Mycobacteriaceae_Mycobacterium	Mycobacterium syngnathidarum																												FALSE
GCF_001942625.1	NZ_MLCL01000057.1	region001	TRUE	FALSE	FALSE	FALSE	0..3181	TRUE	Bacteria_Actinobacteria_Corynebacteriales_Mycobacteriaceae_Mycobacterium	Mycobacterium syngnathidarum																												FALSE
GCF_001942625.1	NZ_MLCL01000068.1	region001	FALSE	FALSE	FALSE	FALSE	0..30405	TRUE	Bacteria_Actinobacteria_Corynebacteriales_Mycobacteriaceae_Mycobacterium	Mycobacterium syngnathidarum																												FALSE
GCF_001942625.1	NZ_MLCL01000076.1	region001	TRUE	FALSE	FALSE	FALSE	48483..121110	FALSE	Bacteria_Actinobacteria_Corynebacteriales_Mycobacteriaceae_Mycobacterium	Mycobacterium syngnathidarum																												FALSE
GCF_001942625.1	NZ_MLCL01000085.1	region001	TRUE	FALSE	FALSE	FALSE	0..9423	TRUE	Bacteria_Actinobacteria_Corynebacteriales_Mycobacteriaceae_Mycobacterium	Mycobacterium syngnathidarum																												FALSE
GCF_002086155.1	NZ_MVHE01000001.1	region002	TRUE	FALSE	FALSE	FALSE	198403..247859	FALSE	Bacteria_Actinobacteria_Corynebacteriales_Mycobacteriaceae_Mycobacterium	Mycobacterium angelicum																												FALSE
GCF_002086155.1	NZ_MVHE01000001.1	region003	TRUE	FALSE	FALSE	FALSE	260715..306673	FALSE	Bacteria_Actinobacteria_Corynebacteriales_Mycobacteriaceae_Mycobacterium	Mycobacterium angelicum																												FALSE
GCF_002086155.1	NZ_MVHE01000001.1	region004	FALSE	FALSE	FALSE	FALSE	313656..334289	TRUE	Bacteria_Actinobacteria_Corynebacteriales_Mycobacteriaceae_Mycobacterium	Mycobacterium angelicum																												FALSE
GCF_002086155.1	NZ_MVHE01000005.1	region001	TRUE	FALSE	FALSE	FALSE	19599..68580	FALSE	Bacteria_Actinobacteria_Corynebacteriales_Mycobacteriaceae_Mycobacterium	Mycobacterium angelicum																												FALSE
GCF_002086155.1	NZ_MVHE01000005.1	region002	TRUE	FALSE	FALSE	FALSE	170229..226834	TRUE	Bacteria_Actinobacteria_Corynebacteriales_Mycobacteriaceae_Mycobacterium	Mycobacterium angelicum																												FALSE
GCF_900157385.1	NZ_LT717701.1	region006	TRUE	TRUE	FALSE	TRUE	2398548..2511400	FALSE	Bacteria_Actinobacteria_Corynebacteriales_Mycobacteriaceae_Mycobacterium	Mycobacterium terramassiliense					770.3	555.7																						FALSE
GCF_002086155.1	NZ_MVHE01000018.1	region001	FALSE	FALSE	FALSE	FALSE	13597..57080	FALSE	Bacteria_Actinobacteria_Corynebacteriales_Mycobacteriaceae_Mycobacterium	Mycobacterium angelicum																												FALSE
GCF_002086155.1	NZ_MVHE01000020.1	region001	FALSE	FALSE	FALSE	FALSE	0..26730	TRUE	Bacteria_Actinobacteria_Corynebacteriales_Mycobacteriaceae_Mycobacterium	Mycobacterium angelicum																												FALSE
GCF_002086155.1	NZ_MVHE01000026.1	region001	FALSE	FALSE	FALSE	FALSE	45508..67468	TRUE	Bacteria_Actinobacteria_Corynebacteriales_Mycobacteriaceae_Mycobacterium	Mycobacterium angelicum																												FALSE
GCF_900232995.1	NZ_OCVX01000003.1	region017	TRUE	TRUE	FALSE	TRUE	3279355..3356903	FALSE	Bacteria_Actinobacteria_Corynebacteriales_Mycobacteriaceae_Mycobacterium	Mycobacterium simulans					667.9	564.8																						FALSE
GCF_002086155.1	NZ_MVHE01000031.1	region001	TRUE	FALSE	FALSE	FALSE	14592..59925	TRUE	Bacteria_Actinobacteria_Corynebacteriales_Mycobacteriaceae_Mycobacterium	Mycobacterium angelicum																												FALSE
GCF_002086155.1	NZ_MVHE01000067.1	region001	TRUE	FALSE	FALSE	FALSE	0..26586	TRUE	Bacteria_Actinobacteria_Corynebacteriales_Mycobacteriaceae_Mycobacterium	Mycobacterium angelicum																												FALSE
GCF_002086155.1	NZ_MVHE01000077.1	region001	FALSE	FALSE	FALSE	FALSE	0..21521	TRUE	Bacteria_Actinobacteria_Corynebacteriales_Mycobacteriaceae_Mycobacterium	Mycobacterium angelicum																												FALSE
GCF_002086155.1	NZ_MVHE01000079.1	region001	TRUE	FALSE	FALSE	FALSE	0..21099	TRUE	Bacteria_Actinobacteria_Corynebacteriales_Mycobacteriaceae_Mycobacterium	Mycobacterium angelicum																												FALSE
GCF_002086155.1	NZ_MVHE01000081.1	region001	TRUE	FALSE	FALSE	FALSE	0..19471	TRUE	Bacteria_Actinobacteria_Corynebacteriales_Mycobacteriaceae_Mycobacterium	Mycobacterium angelicum																												FALSE
GCF_002086155.1	NZ_MVHE01000086.1	region001	FALSE	FALSE	FALSE	FALSE	0..18114	TRUE	Bacteria_Actinobacteria_Corynebacteriales_Mycobacteriaceae_Mycobacterium	Mycobacterium angelicum																												FALSE
GCF_002086155.1	NZ_MVHE01000089.1	region001	TRUE	FALSE	FALSE	FALSE	0..17344	TRUE	Bacteria_Actinobacteria_Corynebacteriales_Mycobacteriaceae_Mycobacterium	Mycobacterium angelicum																												FALSE
GCF_002086155.1	NZ_MVHE01000093.1	region001	TRUE	FALSE	FALSE	FALSE	0..15928	TRUE	Bacteria_Actinobacteria_Corynebacteriales_Mycobacteriaceae_Mycobacterium	Mycobacterium angelicum																												FALSE
GCF_002086155.1	NZ_MVHE01000094.1	region001	TRUE	FALSE	FALSE	FALSE	0..15738	TRUE	Bacteria_Actinobacteria_Corynebacteriales_Mycobacteriaceae_Mycobacterium	Mycobacterium angelicum																												FALSE
GCF_002086155.1	NZ_MVHE01000111.1	region001	FALSE	FALSE	FALSE	FALSE	0..9550	TRUE	Bacteria_Actinobacteria_Corynebacteriales_Mycobacteriaceae_Mycobacterium	Mycobacterium angelicum																												FALSE
GCF_002086155.1	NZ_MVHE01000121.1	region001	TRUE	FALSE	FALSE	FALSE	0..7579	TRUE	Bacteria_Actinobacteria_Corynebacteriales_Mycobacteriaceae_Mycobacterium	Mycobacterium angelicum																												FALSE
GCF_002086155.1	NZ_MVHE01000122.1	region001	TRUE	FALSE	FALSE	FALSE	0..7306	TRUE	Bacteria_Actinobacteria_Corynebacteriales_Mycobacteriaceae_Mycobacterium	Mycobacterium angelicum																												FALSE
GCF_002086155.1	NZ_MVHE01000132.1	region001	TRUE	FALSE	FALSE	FALSE	0..5623	TRUE	Bacteria_Actinobacteria_Corynebacteriales_Mycobacteriaceae_Mycobacterium	Mycobacterium angelicum																												FALSE
GCF_002086155.1	NZ_MVHE01000137.1	region001	TRUE	FALSE	FALSE	FALSE	0..4596	TRUE	Bacteria_Actinobacteria_Corynebacteriales_Mycobacteriaceae_Mycobacterium	Mycobacterium angelicum																												FALSE
GCF_002086155.1	NZ_MVHE01000168.1	region001	TRUE	FALSE	FALSE	FALSE	0..2222	TRUE	Bacteria_Actinobacteria_Corynebacteriales_Mycobacteriaceae_Mycobacterium	Mycobacterium angelicum																												FALSE
GCF_002086155.1	NZ_MVHE01000170.1	region001	TRUE	FALSE	FALSE	FALSE	0..2118	TRUE	Bacteria_Actinobacteria_Corynebacteriales_Mycobacteriaceae_Mycobacterium	Mycobacterium angelicum																												FALSE
GCF_900292015.1	NZ_LR130759.1	region015	TRUE	TRUE	FALSE	TRUE	3725895..3793280	FALSE	Bacteria_Actinobacteria_Corynebacteriales_Mycobacteriaceae_Mycobacterium	Mycobacterium basiliense					649.4	548.2																						FALSE
GCF_002086485.1	NZ_MVHF01000005.1	region001	FALSE	FALSE	FALSE	FALSE	160925..203457	FALSE	Bacteria_Actinobacteria_Corynebacteriales_Mycobacteriaceae_Mycobacterium	Mycobacterium aquaticum																												FALSE
GCF_002086485.1	NZ_MVHF01000010.1	region001	TRUE	FALSE	FALSE	FALSE	139835..197852	FALSE	Bacteria_Actinobacteria_Corynebacteriales_Mycobacteriaceae_Mycobacterium	Mycobacterium aquaticum																												FALSE
GCF_002086485.1	NZ_MVHF01000013.1	region001	FALSE	FALSE	FALSE	FALSE	109851..145078	TRUE	Bacteria_Actinobacteria_Corynebacteriales_Mycobacteriaceae_Mycobacterium	Mycobacterium aquaticum																												FALSE
GCF_002086485.1	NZ_MVHF01000020.1	region001	TRUE	FALSE	FALSE	FALSE	17943..65628	FALSE	Bacteria_Actinobacteria_Corynebacteriales_Mycobacteriaceae_Mycobacterium	Mycobacterium aquaticum																												FALSE
GCF_002086485.1	NZ_MVHF01000057.1	region001	FALSE	FALSE	FALSE	FALSE	7701..47091	TRUE	Bacteria_Actinobacteria_Corynebacteriales_Mycobacteriaceae_Mycobacterium	Mycobacterium aquaticum																												FALSE
GCF_900417275.1	NZ_UEGW01000001.1	region007	TRUE	TRUE	FALSE	TRUE	2989222..3057357	FALSE	Bacteria_Actinobacteria_Corynebacteriales_Mycobacteriaceae_Mycobacterium	Mycobacterium shimoidei					726.7	541																						FALSE
GCF_002086635.1	NZ_MVHD01000007.1	region001	FALSE	FALSE	FALSE	FALSE	0..27831	TRUE	Bacteria_Actinobacteria_Corynebacteriales_Mycobacteriaceae_Mycobacterium	Mycobacterium alsense																												FALSE
GCF_002086635.1	NZ_MVHD01000022.1	region001	TRUE	FALSE	FALSE	FALSE	13193..67787	FALSE	Bacteria_Actinobacteria_Corynebacteriales_Mycobacteriaceae_Mycobacterium	Mycobacterium alsense																												FALSE
GCF_002086635.1	NZ_MVHD01000041.1	region001	TRUE	FALSE	FALSE	FALSE	0..53738	TRUE	Bacteria_Actinobacteria_Corynebacteriales_Mycobacteriaceae_Mycobacterium	Mycobacterium alsense																												FALSE
GCF_900453395.1	NZ_UATA01000017.1	region001	TRUE	TRUE	FALSE	TRUE	251153..321890	FALSE	Bacteria_Actinobacteria_Corynebacteriales_Mycobacteriaceae_Mycobacterium	Mycobacterium xenopi					735.5	547.7																						FALSE
GCF_002086635.1	NZ_MVHD01000064.1	region001	FALSE	FALSE	FALSE	FALSE	3172..29165	TRUE	Bacteria_Actinobacteria_Corynebacteriales_Mycobacteriaceae_Mycobacterium	Mycobacterium alsense																												FALSE
GCF_002086635.1	NZ_MVHD01000099.1	region001	TRUE	FALSE	FALSE	FALSE	0..6408	TRUE	Bacteria_Actinobacteria_Corynebacteriales_Mycobacteriaceae_Mycobacterium	Mycobacterium alsense																												FALSE
GCF_900566055.1	NZ_UPHQ01000184.1	region001	TRUE	TRUE	FALSE	TRUE	0..38533	TRUE	Bacteria_Actinobacteria_Corynebacteriales_Mycobacteriaceae_Mycobacterium	Mycobacterium innocens					654.6	535																						FALSE
GCF_002086735.1	NZ_MVIJ01000002.1	region001	FALSE	FALSE	FALSE	FALSE	149967..192397	FALSE	Bacteria_Actinobacteria_Corynebacteriales_Mycobacteriaceae_Mycobacterium	Mycobacterium scrofulaceum																												FALSE
GCF_002086735.1	NZ_MVIJ01000002.1	region002	FALSE	FALSE	FALSE	FALSE	193322..219230	TRUE	Bacteria_Actinobacteria_Corynebacteriales_Mycobacteriaceae_Mycobacterium	Mycobacterium scrofulaceum																												FALSE
GCF_002086735.1	NZ_MVIJ01000005.1	region002	TRUE	FALSE	FALSE	FALSE	119740..160780	TRUE	Bacteria_Actinobacteria_Corynebacteriales_Mycobacteriaceae_Mycobacterium	Mycobacterium scrofulaceum																												FALSE
GCF_002086735.1	NZ_MVIJ01000008.1	region001	FALSE	FALSE	FALSE	FALSE	15713..58953	FALSE	Bacteria_Actinobacteria_Corynebacteriales_Mycobacteriaceae_Mycobacterium	Mycobacterium scrofulaceum																												FALSE
GCF_002086735.1	NZ_MVIJ01000025.1	region001	TRUE	FALSE	FALSE	FALSE	0..33731	TRUE	Bacteria_Actinobacteria_Corynebacteriales_Mycobacteriaceae_Mycobacterium	Mycobacterium scrofulaceum																												FALSE
GCF_002086735.1	NZ_MVIJ01000034.1	region001	TRUE	FALSE	FALSE	FALSE	0..46034	TRUE	Bacteria_Actinobacteria_Corynebacteriales_Mycobacteriaceae_Mycobacterium	Mycobacterium scrofulaceum																												FALSE
GCF_002086735.1	NZ_MVIJ01000052.1	region001	TRUE	FALSE	FALSE	FALSE	4938..33550	TRUE	Bacteria_Actinobacteria_Corynebacteriales_Mycobacteriaceae_Mycobacterium	Mycobacterium scrofulaceum																												FALSE
GCF_002086915.1	NZ_MWQA01000001.1	region002	TRUE	FALSE	FALSE	FALSE	457754..525492	FALSE	Bacteria_Actinobacteria_Corynebacteriales_Mycobacteriaceae_Mycobacterium	Mycobacterium persicum																												FALSE
GCF_900566055.1	NZ_UPHQ01000212.1	region001	TRUE	TRUE	FALSE	TRUE	17575..50899	TRUE	Bacteria_Actinobacteria_Corynebacteriales_Mycobacteriaceae_Mycobacterium	Mycobacterium innocens					710.8																							FALSE
GCF_900566065.1	NZ_UPHP01000097.1	region001	TRUE	TRUE	FALSE	TRUE	1074..56609	TRUE	Bacteria_Actinobacteria_Corynebacteriales_Mycobacteriaceae_Mycobacterium	Mycobacterium attenuatum					652.2	535																						FALSE
GCF_002086915.1	NZ_MWQA01000001.1	region009	TRUE	FALSE	FALSE	FALSE	2656477..2700259	FALSE	Bacteria_Actinobacteria_Corynebacteriales_Mycobacteriaceae_Mycobacterium	Mycobacterium persicum																												FALSE
GCF_002086915.1	NZ_MWQA01000001.1	region011	TRUE	FALSE	FALSE	FALSE	4129045..4199760	FALSE	Bacteria_Actinobacteria_Corynebacteriales_Mycobacteriaceae_Mycobacterium	Mycobacterium persicum																												FALSE
GCF_002086915.1	NZ_MWQA01000001.1	region013	FALSE	FALSE	FALSE	FALSE	4420540..4462837	FALSE	Bacteria_Actinobacteria_Corynebacteriales_Mycobacteriaceae_Mycobacterium	Mycobacterium persicum																												FALSE
GCF_002086915.1	NZ_MWQA01000001.1	region014	FALSE	FALSE	FALSE	FALSE	4690839..4730703	FALSE	Bacteria_Actinobacteria_Corynebacteriales_Mycobacteriaceae_Mycobacterium	Mycobacterium persicum																												FALSE
GCF_002086915.1	NZ_MWQA01000001.1	region015	FALSE	FALSE	FALSE	FALSE	5211734..5330288	FALSE	Bacteria_Actinobacteria_Corynebacteriales_Mycobacteriaceae_Mycobacterium	Mycobacterium persicum																												FALSE
GCF_002086915.1	NZ_MWQA01000001.1	region016	FALSE	FALSE	FALSE	FALSE	5573941..5617487	FALSE	Bacteria_Actinobacteria_Corynebacteriales_Mycobacteriaceae_Mycobacterium	Mycobacterium persicum																												FALSE
GCF_002101675.1	NZ_LQOY01000008.1	region001	TRUE	FALSE	FALSE	FALSE	0..7506	TRUE	Bacteria_Actinobacteria_Corynebacteriales_Mycobacteriaceae_Mycobacterium	Mycobacterium gordonae																												FALSE
GCF_002101675.1	NZ_LQOY01000016.1	region001	TRUE	FALSE	FALSE	FALSE	62371..116890	FALSE	Bacteria_Actinobacteria_Corynebacteriales_Mycobacteriaceae_Mycobacterium	Mycobacterium gordonae																												FALSE
GCF_002101675.1	NZ_LQOY01000041.1	region001	TRUE	FALSE	FALSE	FALSE	0..34364	TRUE	Bacteria_Actinobacteria_Corynebacteriales_Mycobacteriaceae_Mycobacterium	Mycobacterium gordonae																												FALSE
GCF_002101675.1	NZ_LQOY01000089.1	region001	TRUE	FALSE	FALSE	FALSE	0..37506	TRUE	Bacteria_Actinobacteria_Corynebacteriales_Mycobacteriaceae_Mycobacterium	Mycobacterium gordonae																												FALSE
GCF_002101675.1	NZ_LQOY01000120.1	region001	TRUE	FALSE	FALSE	FALSE	0..2648	TRUE	Bacteria_Actinobacteria_Corynebacteriales_Mycobacteriaceae_Mycobacterium	Mycobacterium gordonae																												FALSE
GCF_002101675.1	NZ_LQOY01000158.1	region001	TRUE	FALSE	FALSE	FALSE	0..12543	TRUE	Bacteria_Actinobacteria_Corynebacteriales_Mycobacteriaceae_Mycobacterium	Mycobacterium gordonae																												FALSE
GCF_002101675.1	NZ_LQOY01000188.1	region001	TRUE	FALSE	FALSE	FALSE	0..2002	TRUE	Bacteria_Actinobacteria_Corynebacteriales_Mycobacteriaceae_Mycobacterium	Mycobacterium gordonae																												FALSE
GCF_900566065.1	NZ_UPHP01000111.1	region001	TRUE	TRUE	FALSE	TRUE	20039..72313	FALSE	Bacteria_Actinobacteria_Corynebacteriales_Mycobacteriaceae_Mycobacterium	Mycobacterium attenuatum					705.9																							FALSE
GCF_002101675.1	NZ_LQOY01000238.1	region001	FALSE	FALSE	FALSE	FALSE	30094..56856	TRUE	Bacteria_Actinobacteria_Corynebacteriales_Mycobacteriaceae_Mycobacterium	Mycobacterium gordonae																												FALSE
GCF_002101675.1	NZ_LQOY01000241.1	region001	TRUE	FALSE	FALSE	FALSE	25658..112443	TRUE	Bacteria_Actinobacteria_Corynebacteriales_Mycobacteriaceae_Mycobacterium	Mycobacterium gordonae																												FALSE
GCF_002101675.1	NZ_LQOY01000257.1	region001	TRUE	FALSE	FALSE	FALSE	4051..58453	FALSE	Bacteria_Actinobacteria_Corynebacteriales_Mycobacteriaceae_Mycobacterium	Mycobacterium gordonae																												FALSE
GCF_002102025.1	NZ_LQOK01000024.1	region001	TRUE	FALSE	FALSE	FALSE	0..64625	TRUE	Bacteria_Actinobacteria_Corynebacteriales_Mycobacteriaceae_Mycobacterium	Mycobacterium bohemicum																												FALSE
GCF_002102025.1	NZ_LQOK01000029.1	region001	FALSE	FALSE	FALSE	FALSE	0..34401	TRUE	Bacteria_Actinobacteria_Corynebacteriales_Mycobacteriaceae_Mycobacterium	Mycobacterium bohemicum																												FALSE
GCF_900566075.1	NZ_UPHU01000001.1	region012	TRUE	TRUE	FALSE	TRUE	4111577..4181136	FALSE	Bacteria_Actinobacteria_Corynebacteriales_Mycobacteriaceae_Mycobacterium	Mycobacterium pseudokansasii					652	524.2																						FALSE
GCF_900566075.1	NZ_UPHU01000001.1	region013	TRUE	TRUE	FALSE	TRUE	4643778..4695959	FALSE	Bacteria_Actinobacteria_Corynebacteriales_Mycobacteriaceae_Mycobacterium	Mycobacterium pseudokansasii					702.7																							FALSE
GCF_002102175.1	NZ_LQOX01000017.1	region001	TRUE	FALSE	FALSE	FALSE	0..4547	TRUE	Bacteria_Actinobacteria_Corynebacteriales_Mycobacteriaceae_Mycobacterium	Mycobacterium gastri																												FALSE
GCF_002102175.1	NZ_LQOX01000043.1	region001	TRUE	FALSE	FALSE	FALSE	0..1217	TRUE	Bacteria_Actinobacteria_Corynebacteriales_Mycobacteriaceae_Mycobacterium	Mycobacterium gastri																												FALSE
GCF_002102175.1	NZ_LQOX01000056.1	region001	FALSE	FALSE	FALSE	FALSE	23717..58952	TRUE	Bacteria_Actinobacteria_Corynebacteriales_Mycobacteriaceae_Mycobacterium	Mycobacterium gastri																												FALSE
GCF_002102175.1	NZ_LQOX01000058.1	region001	FALSE	FALSE	FALSE	FALSE	0..9707	TRUE	Bacteria_Actinobacteria_Corynebacteriales_Mycobacteriaceae_Mycobacterium	Mycobacterium gastri																												FALSE
GCF_002102175.1	NZ_LQOX01000072.1	region001	FALSE	FALSE	FALSE	FALSE	0..14478	TRUE	Bacteria_Actinobacteria_Corynebacteriales_Mycobacteriaceae_Mycobacterium	Mycobacterium gastri																												FALSE
GCF_002102175.1	NZ_LQOX01000082.1	region001	TRUE	FALSE	FALSE	FALSE	48400..82725	TRUE	Bacteria_Actinobacteria_Corynebacteriales_Mycobacteriaceae_Mycobacterium	Mycobacterium gastri																												FALSE
GCF_002102175.1	NZ_LQOX01000096.1	region001	TRUE	FALSE	FALSE	FALSE	1235..45678	FALSE	Bacteria_Actinobacteria_Corynebacteriales_Mycobacteriaceae_Mycobacterium	Mycobacterium gastri																												FALSE
GCF_002102175.1	NZ_LQOX01000100.1	region001	TRUE	FALSE	FALSE	FALSE	0..34234	TRUE	Bacteria_Actinobacteria_Corynebacteriales_Mycobacteriaceae_Mycobacterium	Mycobacterium gastri																												FALSE
GCF_002102175.1	NZ_LQOX01000102.1	region001	TRUE	FALSE	FALSE	FALSE	0..7993	TRUE	Bacteria_Actinobacteria_Corynebacteriales_Mycobacteriaceae_Mycobacterium	Mycobacterium gastri																												FALSE
GCF_002102175.1	NZ_LQOX01000112.1	region001	FALSE	FALSE	FALSE	FALSE	0..99266	TRUE	Bacteria_Actinobacteria_Corynebacteriales_Mycobacteriaceae_Mycobacterium	Mycobacterium gastri																												FALSE
GCF_905219535.1	NZ_CAJMWN010000001.1	region007	TRUE	TRUE	FALSE	TRUE	2110216..2175747	FALSE	Bacteria_Actinobacteria_Corynebacteriales_Mycobacteriaceae_Mycobacterium	Mycobacterium riyadhense					664.3	562.8																						FALSE
GCF_000222105.3	NZ_AFVW02000002.1	region001	TRUE	TRUE	FALSE	TRUE	312700..401460	FALSE	Bacteria_Actinobacteria_Corynebacteriales_Mycobacteriaceae_Mycobacterium_Mycobacterium avium complex (MAC)	Mycobacterium colombiense CECT 3035					754.5																							FALSE
GCF_002102185.1	NZ_LQOW01000003.1	region001	FALSE	FALSE	FALSE	FALSE	137632..180896	FALSE	Bacteria_Actinobacteria_Corynebacteriales_Mycobacteriaceae_Mycobacterium	Mycobacterium fragae																												FALSE
GCF_002102185.1	NZ_LQOW01000005.1	region001	FALSE	FALSE	FALSE	FALSE	119346..162841	FALSE	Bacteria_Actinobacteria_Corynebacteriales_Mycobacteriaceae_Mycobacterium	Mycobacterium fragae																												FALSE
GCF_000277125.1	NC_016946.1	region008	TRUE	TRUE	FALSE	TRUE	2052068..2113019	FALSE	Bacteria_Actinobacteria_Corynebacteriales_Mycobacteriaceae_Mycobacterium_Mycobacterium avium complex (MAC)	Mycobacterium intracellulare ATCC 13950					766.1																							FALSE
GCF_002102185.1	NZ_LQOW01000011.1	region001	TRUE	FALSE	FALSE	FALSE	0..3992	TRUE	Bacteria_Actinobacteria_Corynebacteriales_Mycobacteriaceae_Mycobacterium	Mycobacterium fragae																												FALSE
GCF_002102185.1	NZ_LQOW01000012.1	region001	TRUE	FALSE	FALSE	FALSE	0..3220	TRUE	Bacteria_Actinobacteria_Corynebacteriales_Mycobacteriaceae_Mycobacterium	Mycobacterium fragae																												FALSE
GCF_002102185.1	NZ_LQOW01000013.1	region001	TRUE	FALSE	FALSE	FALSE	0..5928	TRUE	Bacteria_Actinobacteria_Corynebacteriales_Mycobacteriaceae_Mycobacterium	Mycobacterium fragae																												FALSE
GCF_002102185.1	NZ_LQOW01000019.1	region001	TRUE	FALSE	FALSE	FALSE	0..3599	TRUE	Bacteria_Actinobacteria_Corynebacteriales_Mycobacteriaceae_Mycobacterium	Mycobacterium fragae																												FALSE
GCF_002102185.1	NZ_LQOW01000028.1	region001	TRUE	FALSE	FALSE	FALSE	151221..203905	FALSE	Bacteria_Actinobacteria_Corynebacteriales_Mycobacteriaceae_Mycobacterium	Mycobacterium fragae																												FALSE
GCF_002102185.1	NZ_LQOW01000031.1	region001	TRUE	FALSE	FALSE	FALSE	<0..36708	TRUE	Bacteria_Actinobacteria_Corynebacteriales_Mycobacteriaceae_Mycobacterium	Mycobacterium fragae																												FALSE
GCF_000696715.1	NZ_AUZQ01000015.1	region002	TRUE	TRUE	FALSE	TRUE	386178..447111	FALSE	Bacteria_Actinobacteria_Corynebacteriales_Mycobacteriaceae_Mycobacterium_Mycobacterium avium complex (MAC)	Mycobacterium avium subsp. hominissuis A5					762.6																							FALSE
GCF_002102185.1	NZ_LQOW01000032.1	region001	FALSE	FALSE	FALSE	FALSE	0..1766	TRUE	Bacteria_Actinobacteria_Corynebacteriales_Mycobacteriaceae_Mycobacterium	Mycobacterium fragae																												FALSE
GCF_002102185.1	NZ_LQOW01000034.1	region001	TRUE	FALSE	FALSE	FALSE	30912..104105	FALSE	Bacteria_Actinobacteria_Corynebacteriales_Mycobacteriaceae_Mycobacterium	Mycobacterium fragae																												FALSE
GCF_002104675.1	NZ_NCXP01000001.1	region002	TRUE	FALSE	FALSE	FALSE	63913..108356	FALSE	Bacteria_Actinobacteria_Corynebacteriales_Mycobacteriaceae_Mycobacterium	Mycobacterium decipiens																												FALSE
GCF_002104675.1	NZ_NCXP01000002.1	region001	TRUE	FALSE	FALSE	FALSE	0..22612	TRUE	Bacteria_Actinobacteria_Corynebacteriales_Mycobacteriaceae_Mycobacterium	Mycobacterium decipiens																												FALSE
GCF_002104675.1	NZ_NCXP01000002.1	region003	FALSE	FALSE	FALSE	FALSE	293682..336916	FALSE	Bacteria_Actinobacteria_Corynebacteriales_Mycobacteriaceae_Mycobacterium	Mycobacterium decipiens																												FALSE
GCF_002104675.1	NZ_NCXP01000003.1	region001	FALSE	FALSE	FALSE	FALSE	52469..123932	FALSE	Bacteria_Actinobacteria_Corynebacteriales_Mycobacteriaceae_Mycobacterium	Mycobacterium decipiens																												FALSE
GCF_002104675.1	NZ_NCXP01000011.1	region001	FALSE	FALSE	FALSE	FALSE	113159..133788	TRUE	Bacteria_Actinobacteria_Corynebacteriales_Mycobacteriaceae_Mycobacterium	Mycobacterium decipiens																												FALSE
GCF_002104675.1	NZ_NCXP01000013.1	region001	FALSE	FALSE	FALSE	FALSE	88503..111677	TRUE	Bacteria_Actinobacteria_Corynebacteriales_Mycobacteriaceae_Mycobacterium	Mycobacterium decipiens																												FALSE
GCF_002104675.1	NZ_NCXP01000014.1	region001	FALSE	FALSE	FALSE	FALSE	0..65109	TRUE	Bacteria_Actinobacteria_Corynebacteriales_Mycobacteriaceae_Mycobacterium	Mycobacterium decipiens																												FALSE
GCF_002104675.1	NZ_NCXP01000018.1	region001	TRUE	FALSE	FALSE	FALSE	0..33023	TRUE	Bacteria_Actinobacteria_Corynebacteriales_Mycobacteriaceae_Mycobacterium	Mycobacterium decipiens																												FALSE
GCF_002104675.1	NZ_NCXP01000022.1	region001	TRUE	FALSE	FALSE	FALSE	36784..74817	TRUE	Bacteria_Actinobacteria_Corynebacteriales_Mycobacteriaceae_Mycobacterium	Mycobacterium decipiens																												FALSE
GCF_002086125.1	NZ_MVHG01000003.1	region001	TRUE	TRUE	FALSE	TRUE	24373..150218	FALSE	Bacteria_Actinobacteria_Corynebacteriales_Mycobacteriaceae_Mycobacterium_Mycobacterium avium complex (MAC)	Mycobacterium arosiense ATCC BAA-1401 = DSM 45069					750.6	546.4																						FALSE
GCF_002104675.1	NZ_NCXP01000041.1	region001	FALSE	FALSE	FALSE	FALSE	0..25052	TRUE	Bacteria_Actinobacteria_Corynebacteriales_Mycobacteriaceae_Mycobacterium	Mycobacterium decipiens																												FALSE
GCF_002104675.1	NZ_NCXP01000054.1	region001	TRUE	FALSE	FALSE	FALSE	0..18503	TRUE	Bacteria_Actinobacteria_Corynebacteriales_Mycobacteriaceae_Mycobacterium	Mycobacterium decipiens																												FALSE
GCF_002104675.1	NZ_NCXP01000060.1	region001	TRUE	FALSE	FALSE	FALSE	0..13068	TRUE	Bacteria_Actinobacteria_Corynebacteriales_Mycobacteriaceae_Mycobacterium	Mycobacterium decipiens																												FALSE
GCF_002104675.1	NZ_NCXP01000064.1	region001	TRUE	FALSE	FALSE	FALSE	0..11037	TRUE	Bacteria_Actinobacteria_Corynebacteriales_Mycobacteriaceae_Mycobacterium	Mycobacterium decipiens																												FALSE
GCF_002104675.1	NZ_NCXP01000068.1	region001	TRUE	FALSE	FALSE	FALSE	0..5925	TRUE	Bacteria_Actinobacteria_Corynebacteriales_Mycobacteriaceae_Mycobacterium	Mycobacterium decipiens																												FALSE
GCF_002104675.1	NZ_NCXP01000080.1	region001	FALSE	FALSE	FALSE	FALSE	0..1775	TRUE	Bacteria_Actinobacteria_Corynebacteriales_Mycobacteriaceae_Mycobacterium	Mycobacterium decipiens																												FALSE
GCF_002104765.1	NZ_NCXM01000002.1	region001	TRUE	FALSE	FALSE	FALSE	<0..24789	TRUE	Bacteria_Actinobacteria_Corynebacteriales_Mycobacteriaceae_Mycobacterium	Mycobacterium vulneris																												FALSE
GCF_002104765.1	NZ_NCXM01000002.1	region003	TRUE	FALSE	FALSE	FALSE	273012..341514	TRUE	Bacteria_Actinobacteria_Corynebacteriales_Mycobacteriaceae_Mycobacterium	Mycobacterium vulneris																												FALSE
GCF_002104765.1	NZ_NCXM01000007.1	region001	TRUE	FALSE	FALSE	FALSE	<0..29807	TRUE	Bacteria_Actinobacteria_Corynebacteriales_Mycobacteriaceae_Mycobacterium	Mycobacterium vulneris																												FALSE
GCF_002104765.1	NZ_NCXM01000007.1	region002	TRUE	FALSE	FALSE	FALSE	38913..89194	FALSE	Bacteria_Actinobacteria_Corynebacteriales_Mycobacteriaceae_Mycobacterium	Mycobacterium vulneris																												FALSE
GCF_002104765.1	NZ_NCXM01000013.1	region001	FALSE	FALSE	FALSE	FALSE	140406..166612	TRUE	Bacteria_Actinobacteria_Corynebacteriales_Mycobacteriaceae_Mycobacterium	Mycobacterium vulneris																												FALSE
GCF_002104765.1	NZ_NCXM01000014.1	region001	FALSE	FALSE	FALSE	FALSE	82956..126538	FALSE	Bacteria_Actinobacteria_Corynebacteriales_Mycobacteriaceae_Mycobacterium	Mycobacterium vulneris																												FALSE
GCF_002104765.1	NZ_NCXM01000021.1	region001	TRUE	FALSE	FALSE	FALSE	0..32050	TRUE	Bacteria_Actinobacteria_Corynebacteriales_Mycobacteriaceae_Mycobacterium	Mycobacterium vulneris																												FALSE
GCF_002086165.1	NZ_MVHL01000022.1	region001	TRUE	TRUE	FALSE	TRUE	105..61038	FALSE	Bacteria_Actinobacteria_Corynebacteriales_Mycobacteriaceae_Mycobacterium_Mycobacterium avium complex (MAC)	Mycobacterium bouchedurhonense					763.6																							FALSE
GCF_002104765.1	NZ_NCXM01000037.1	region001	TRUE	FALSE	FALSE	FALSE	16523..50465	TRUE	Bacteria_Actinobacteria_Corynebacteriales_Mycobacteriaceae_Mycobacterium	Mycobacterium vulneris																												FALSE
GCF_002104765.1	NZ_NCXM01000038.1	region001	TRUE	FALSE	FALSE	FALSE	0..37896	TRUE	Bacteria_Actinobacteria_Corynebacteriales_Mycobacteriaceae_Mycobacterium	Mycobacterium vulneris																												FALSE
GCF_002104765.1	NZ_NCXM01000059.1	region001	TRUE	FALSE	FALSE	FALSE	0..9909	TRUE	Bacteria_Actinobacteria_Corynebacteriales_Mycobacteriaceae_Mycobacterium	Mycobacterium vulneris																												FALSE
GCF_002104765.1	NZ_NCXM01000061.1	region001	TRUE	FALSE	FALSE	FALSE	0..9422	TRUE	Bacteria_Actinobacteria_Corynebacteriales_Mycobacteriaceae_Mycobacterium	Mycobacterium vulneris																												FALSE
GCF_002104765.1	NZ_NCXM01000064.1	region001	TRUE	FALSE	FALSE	FALSE	0..6767	TRUE	Bacteria_Actinobacteria_Corynebacteriales_Mycobacteriaceae_Mycobacterium	Mycobacterium vulneris																												FALSE
GCF_002104765.1	NZ_NCXM01000065.1	region001	TRUE	FALSE	FALSE	FALSE	0..6164	TRUE	Bacteria_Actinobacteria_Corynebacteriales_Mycobacteriaceae_Mycobacterium	Mycobacterium vulneris																												FALSE
GCF_002104765.1	NZ_NCXM01000071.1	region001	TRUE	FALSE	FALSE	FALSE	0..3330	TRUE	Bacteria_Actinobacteria_Corynebacteriales_Mycobacteriaceae_Mycobacterium	Mycobacterium vulneris																												FALSE
GCF_002104765.1	NZ_NCXM01000073.1	region001	TRUE	FALSE	FALSE	FALSE	0..2099	TRUE	Bacteria_Actinobacteria_Corynebacteriales_Mycobacteriaceae_Mycobacterium	Mycobacterium vulneris																												FALSE
GCF_002104765.1	NZ_NCXM01000075.1	region001	TRUE	FALSE	FALSE	FALSE	0..1604	TRUE	Bacteria_Actinobacteria_Corynebacteriales_Mycobacteriaceae_Mycobacterium	Mycobacterium vulneris																												FALSE
GCF_002104765.1	NZ_NCXM01000077.1	region001	TRUE	FALSE	FALSE	FALSE	0..1489	TRUE	Bacteria_Actinobacteria_Corynebacteriales_Mycobacteriaceae_Mycobacterium	Mycobacterium vulneris																												FALSE
GCF_002104765.1	NZ_NCXM01000088.1	region001	TRUE	FALSE	FALSE	FALSE	0..1199	TRUE	Bacteria_Actinobacteria_Corynebacteriales_Mycobacteriaceae_Mycobacterium	Mycobacterium vulneris																												FALSE
GCF_002116635.1	NZ_LQPW01000009.1	region001	TRUE	FALSE	FALSE	FALSE	0..18077	TRUE	Bacteria_Actinobacteria_Corynebacteriales_Mycobacteriaceae_Mycobacterium	Mycobacterium szulgai																												FALSE
GCF_002116635.1	NZ_LQPW01000010.1	region001	TRUE	FALSE	FALSE	FALSE	18071..75030	FALSE	Bacteria_Actinobacteria_Corynebacteriales_Mycobacteriaceae_Mycobacterium	Mycobacterium szulgai																												FALSE
GCF_002116635.1	NZ_LQPW01000019.1	region002	TRUE	FALSE	FALSE	FALSE	200237..252381	FALSE	Bacteria_Actinobacteria_Corynebacteriales_Mycobacteriaceae_Mycobacterium	Mycobacterium szulgai																												FALSE
GCF_002086775.1	NZ_MVIL01000039.1	region001	TRUE	TRUE	FALSE	TRUE	0..41673	TRUE	Bacteria_Actinobacteria_Corynebacteriales_Mycobacteriaceae_Mycobacterium_Mycobacterium avium complex (MAC)	Mycobacterium timonense					763.6																							FALSE
GCF_002116635.1	NZ_LQPW01000032.1	region001	FALSE	FALSE	FALSE	FALSE	0..22584	TRUE	Bacteria_Actinobacteria_Corynebacteriales_Mycobacteriaceae_Mycobacterium	Mycobacterium szulgai																												FALSE
GCF_002116635.1	NZ_LQPW01000057.1	region001	TRUE	FALSE	FALSE	FALSE	0..12030	TRUE	Bacteria_Actinobacteria_Corynebacteriales_Mycobacteriaceae_Mycobacterium	Mycobacterium szulgai																												FALSE
GCF_002116635.1	NZ_LQPW01000075.1	region001	TRUE	FALSE	FALSE	FALSE	0..34988	TRUE	Bacteria_Actinobacteria_Corynebacteriales_Mycobacteriaceae_Mycobacterium	Mycobacterium szulgai																												FALSE
GCF_002116635.1	NZ_LQPW01000094.1	region001	FALSE	FALSE	FALSE	FALSE	0..2257	TRUE	Bacteria_Actinobacteria_Corynebacteriales_Mycobacteriaceae_Mycobacterium	Mycobacterium szulgai																												FALSE
GCF_002116635.1	NZ_LQPW01000103.1	region001	TRUE	FALSE	FALSE	FALSE	0..4646	TRUE	Bacteria_Actinobacteria_Corynebacteriales_Mycobacteriaceae_Mycobacterium	Mycobacterium szulgai																												FALSE
GCF_002116635.1	NZ_LQPW01000122.1	region001	FALSE	FALSE	FALSE	FALSE	0..18630	TRUE	Bacteria_Actinobacteria_Corynebacteriales_Mycobacteriaceae_Mycobacterium	Mycobacterium szulgai																												FALSE
GCF_002116635.1	NZ_LQPW01000123.1	region001	TRUE	FALSE	FALSE	FALSE	0..49813	TRUE	Bacteria_Actinobacteria_Corynebacteriales_Mycobacteriaceae_Mycobacterium	Mycobacterium szulgai																												FALSE
GCF_002116635.1	NZ_LQPW01000125.1	region001	TRUE	FALSE	FALSE	FALSE	24000..71137	FALSE	Bacteria_Actinobacteria_Corynebacteriales_Mycobacteriaceae_Mycobacterium	Mycobacterium szulgai																												FALSE
GCF_002116635.1	NZ_LQPW01000125.1	region002	FALSE	FALSE	FALSE	FALSE	91055..112975	TRUE	Bacteria_Actinobacteria_Corynebacteriales_Mycobacteriaceae_Mycobacterium	Mycobacterium szulgai																												FALSE
GCF_002116635.1	NZ_LQPW01000126.1	region001	TRUE	FALSE	FALSE	FALSE	0..9708	TRUE	Bacteria_Actinobacteria_Corynebacteriales_Mycobacteriaceae_Mycobacterium	Mycobacterium szulgai																												FALSE
GCF_002116635.1	NZ_LQPW01000153.1	region001	TRUE	FALSE	FALSE	FALSE	13483..45511	TRUE	Bacteria_Actinobacteria_Corynebacteriales_Mycobacteriaceae_Mycobacterium	Mycobacterium szulgai																												FALSE
GCF_002116635.1	NZ_LQPW01000158.1	region001	FALSE	FALSE	FALSE	FALSE	0..33383	TRUE	Bacteria_Actinobacteria_Corynebacteriales_Mycobacteriaceae_Mycobacterium	Mycobacterium szulgai																												FALSE
GCF_002116635.1	NZ_LQPW01000160.1	region001	TRUE	FALSE	FALSE	FALSE	0..19584	TRUE	Bacteria_Actinobacteria_Corynebacteriales_Mycobacteriaceae_Mycobacterium	Mycobacterium szulgai																												FALSE
GCF_002116635.1	NZ_LQPW01000162.1	region001	TRUE	FALSE	FALSE	FALSE	0..13211	TRUE	Bacteria_Actinobacteria_Corynebacteriales_Mycobacteriaceae_Mycobacterium	Mycobacterium szulgai																												FALSE
GCF_002116635.1	NZ_LQPW01000165.1	region001	FALSE	FALSE	FALSE	FALSE	12984..56467	FALSE	Bacteria_Actinobacteria_Corynebacteriales_Mycobacteriaceae_Mycobacterium	Mycobacterium szulgai																												FALSE
GCF_002285715.1	NZ_CP023147.1	region007	TRUE	TRUE	FALSE	TRUE	1789855..1850800	FALSE	Bacteria_Actinobacteria_Corynebacteriales_Mycobacteriaceae_Mycobacterium_Mycobacterium avium complex (MAC)	Mycobacterium marseillense					772.1																							FALSE
GCF_002116635.1	NZ_LQPW01000178.1	region001	FALSE	FALSE	FALSE	FALSE	115793..159321	FALSE	Bacteria_Actinobacteria_Corynebacteriales_Mycobacteriaceae_Mycobacterium	Mycobacterium szulgai																												FALSE
GCF_002157835.1	NZ_CP020809.1	region001	TRUE	FALSE	FALSE	FALSE	221544..278950	FALSE	Bacteria_Actinobacteria_Corynebacteriales_Mycobacteriaceae_Mycobacterium	Mycobacterium dioxanotrophicus																												FALSE
GCF_010731775.1	NZ_AP022590.1	region009	TRUE	TRUE	FALSE	TRUE	2217080..2278025	FALSE	Bacteria_Actinobacteria_Corynebacteriales_Mycobacteriaceae_Mycobacterium_Mycobacterium avium complex (MAC)	Mycobacterium mantenii					759.5																							FALSE
GCF_002157835.1	NZ_CP020809.1	region007	TRUE	FALSE	FALSE	FALSE	3113627..3160147	FALSE	Bacteria_Actinobacteria_Corynebacteriales_Mycobacteriaceae_Mycobacterium	Mycobacterium dioxanotrophicus																												FALSE
GCF_002157835.1	NZ_CP020809.1	region008	FALSE	FALSE	FALSE	FALSE	3411016..3454271	FALSE	Bacteria_Actinobacteria_Corynebacteriales_Mycobacteriaceae_Mycobacterium	Mycobacterium dioxanotrophicus																												FALSE
GCF_002157835.1	NZ_CP020809.1	region010	FALSE	FALSE	FALSE	FALSE	4010959..4057974	FALSE	Bacteria_Actinobacteria_Corynebacteriales_Mycobacteriaceae_Mycobacterium	Mycobacterium dioxanotrophicus																												FALSE
GCF_002157835.1	NZ_CP020809.1	region011	FALSE	FALSE	FALSE	FALSE	4716034..4756888	FALSE	Bacteria_Actinobacteria_Corynebacteriales_Mycobacteriaceae_Mycobacterium	Mycobacterium dioxanotrophicus																												FALSE
GCF_002157835.1	NZ_CP020809.1	region012	TRUE	FALSE	FALSE	FALSE	5818586..5861865	FALSE	Bacteria_Actinobacteria_Corynebacteriales_Mycobacteriaceae_Mycobacterium	Mycobacterium dioxanotrophicus																												FALSE
GCF_002245615.1	NZ_NKCO01000001.1	region001	FALSE	FALSE	FALSE	FALSE	85453..127832	FALSE	Bacteria_Actinobacteria_Corynebacteriales_Mycobacteriaceae_Mycobacterium	Mycobacterium neumannii																												FALSE
GCF_002245615.1	NZ_NKCO01000001.1	region002	FALSE	FALSE	FALSE	FALSE	389257..431753	FALSE	Bacteria_Actinobacteria_Corynebacteriales_Mycobacteriaceae_Mycobacterium	Mycobacterium neumannii																												FALSE
GCF_016756055.1	NZ_AP024251.1	region007	TRUE	TRUE	FALSE	TRUE	1969078..2030029	FALSE	Bacteria_Actinobacteria_Corynebacteriales_Mycobacteriaceae_Mycobacterium_Mycobacterium avium complex (MAC)	Mycobacterium paraintracellulare					766.1																							FALSE
GCF_002245615.1	NZ_NKCO01000010.1	region001	TRUE	FALSE	FALSE	FALSE	16696..71921	FALSE	Bacteria_Actinobacteria_Corynebacteriales_Mycobacteriaceae_Mycobacterium	Mycobacterium neumannii																												FALSE
[truncated: 30,030 more rows]

## Sheet: 1d - ornicorrugatin fragm
Fragment composition	Experimental mass (m/z)	Calculated mass (m/z)
C19H34N5O3+	380.2681	380.2662
C23H38N7O4+	476.3011	476.2985
[truncated: 5 more rows]
